# Supplementary material for: Novel brain-penetrant inhibitor of G9a methylase blocks Alzheimer’s disease proteopathology for precision medication
Source: Research Square preprint supplement (doi:10.21203/rs.3.rs-2743792/v1), 2023-11-21
Supplement: Supplementary file 1 [file 1a8c14ae76cd33f8ec769e60.xlsx]

## Sheet: list
List of tables
Table A	ChaC-UNC0965 with human organoids
Table B	ChaC-UNC0965 with hippocampus of WT, 5xFAD and MS1262-treated 5xFAD mice
Table C	Proteomics and phospho-proteomics data from age matched controls (WT), 5xFAD/APP-NLGF (AD) and AD mice treated with MS1262 (AD-tr)
Table D	Tables of overall pathway and Disease/bio-function enrichment results
Table E	Summary of correlation between AD/G9a-corregulated proteins and Abeta peptides (6-28) in AD patients

## Sheet: Table S1A
Table 1. ChaC-UNC0965 with human organoids
													Experiment #1											Experiment #2
Gene names	Protein IDs	Majority protein IDs	Protein names	Razor + unique peptides	Unique peptides	Unique + razor sequence coverage [%]	Unique sequence coverage [%]	Mol. weight [kDa]	Q-value	Score	Intensity	MS/MS count	-Log p-value exp1_UNC965_ctrl/emp_ctrl	log2 exp1_UNC965_ctrl/emp_ctrl	exp1_UNC965_ctrl/emp_ctrl_p0.05	-Log p-value exp1_UNC965_AD/emp_AD	q-value exp1_UNC965_AD/emp_AD	log2 exp1_UNC965_AD/emp_AD	exp1_UNC965_AD/emp_AD_p0.05	-Log p-value exp1_UNC965_AD/ctrl	q-value exp1_UNC965_AD/ctrl	log2 exp1_UNC965_AD/ctrl	exp1_UNC965_AD/ctrl	-Log p-value exp2_UNC965_ctrl/emp_ctrl	q-value exp2_UNC965_ctrl/emp_ctrl	log2 exp2_UNC965_ctrl/emp_ctrl	exp2_UNC965_ctrl/emp_ctrl_p0.05	-Log p-value exp2_UNC965_AD/emp_AD	q-value exp2_UNC965_AD/emp_AD	log2 exp2_UNC965_AD/emp_AD	exp2_UNC965_AD/emp_AD_p0.05	-Log p-value exp2_UNC965_AD/ctrl	q-value exp2_UNC965_AD/ctrl	log2 exp2_UNC965_AD/ctrl	exp2_UNC965_AD/ctrl
HIST1H1E	P10412	P10412	Histone H1.4	4	4	13.2	13.2	21.865	0	95.788	214950000000	206	8.38226	8.32142	ctrl_spe	5.17815	0.000712329	8.23643	AD_spe	2.47013	0.152516	1.05208	up1	6.06297	0.000231884	3.22541	ctrl_spe	7.89179	0	4.44232	AD_spe	5.94315	0.001	1.50544	up1
RALY	Q9UKM9	Q9UKM9	RNA-binding protein Raly	24	1	70.3	16.7	32.463	0	307	68325000000	388	9.19092	7.37048	ctrl_spe	10.5601	0	7.56742	AD_spe	0.614585	0.569101	-0.27334		6.68617	0.000156863	5.54435	ctrl_spe	7.57609	0	5.85508	AD_spe	0.295396	0.715735	-0.168307
SYNCRIP	O60506;F6UXX1	O60506	Heterogeneous nuclear ribonucleoprotein Q	30	4	45.4	12.4	69.602	0	323.31	45523000000	525	9.48225	7.28799	ctrl_spe	7.11772	0	7.66731	AD_spe	0.480965	0.640352	-0.203001		10.9031	0	5.44155	ctrl_spe	6.47493	0	4.78132	AD_spe	1.42625	0.211377	-0.274782
RPL26	P61254;J3QRI7;J3QQQ9;J3QQV1;J3QRC4;J3KSS0;J3KS10	P61254;J3QRI7;J3QQQ9;J3QQV1;J3QRC4	60S ribosomal protein L26	20	5	66.9	15.9	17.258	0	141.43	303120000000	495	6.51034	7.28741	ctrl_spe	8.71032	0	8.785	AD_spe	1.60821	0.249697	1.00264	up1	9.44699	0	7.22387	ctrl_spe	8.84089	0	7.46084	AD_spe	0.958082	0.343529	0.332804
YBX1	P67809;H0Y449;C9J5V9	P67809;H0Y449;C9J5V9	Nuclease-sensitive element-binding protein 1	28	20	77.2	69.8	35.924	0	323.31	350070000000	911	6.51192	7.13413	ctrl_spe	9.01232	0	6.64002	AD_spe	2.06442	0.196679	0.584166	up0.5	8.46242	0	7.43205	ctrl_spe	8.70843	0	7.80651	AD_spe	0.910825	0.363333	0.405305
HNRNPUL2;HNRNPUL2-BSCL2	Q1KMD3;H3BQZ7	Q1KMD3;H3BQZ7	Heterogeneous nuclear ribonucleoprotein U-like protein 2	42	42	36.7	36.7	85.104	0	210.18	35635000000	586	8.16118	7.02056	ctrl_spe	6.33274	0.000607595	6.18019	AD_spe	0.828404	0.475865	-0.418046		5.76805	0.00048	4.03482	ctrl_spe	6.05763	0	4.20756	AD_spe	0.000659563	0.998383	-0.000526746
RPL23A	P62750;H7BY10;K7ERT8;A8MUS3;K7EJV9;K7EMA7	P62750;H7BY10;K7ERT8;A8MUS3;K7EJV9	60S ribosomal protein L23a	18	18	53.2	53.2	17.695	0	139.98	236440000000	470	5.53763	6.46825	ctrl_spe	8.11786	0	9.03215	AD_spe	1.46228	0.279932	0.912999	up0.5	6.36821	0.000137931	6.19338	ctrl_spe	4.5485	0.000448	5.5613	AD_spe	1.29576	0.247885	0.570294	up0.5
RPS13	P62277;J3KMX5;E9PS50	P62277;J3KMX5	40S ribosomal protein S13	16	16	60.3	60.3	17.222	0	50.813	196960000000	306	4.91869	6.30199	ctrl_spe	7.78567	0	8.26652	AD_spe	1.02866	0.39167	0.967359		5.67163	0.000439024	4.96265	ctrl_spe	4.87978	0.00027451	4.39863	AD_spe	0.941312	0.349119	0.449524
HNRNPA0	Q13151	Q13151	Heterogeneous nuclear ribonucleoprotein A0	20	20	58.4	58.4	30.84	0	323.31	111560000000	470	4.79093	6.14851	ctrl_spe	7.82714	0	7.11786	AD_spe	0.965668	0.412053	0.729824		7.9075	0	6.10577	ctrl_spe	7.12176	0	5.99304	AD_spe	0.225965	0.790958	0.143349
DHX9	Q08211	Q08211	ATP-dependent RNA helicase A	62	62	42.7	42.7	140.96	0	323.31	176470000000	1094	10.6817	6.14814	ctrl_spe	8.23305	0	8.67433	AD_spe	0.489248	0.647374	0.10598		8.25595	0	6.99877	ctrl_spe	6.5009	0	6.69811	AD_spe	1.20003	0.275031	0.269426
HIST1H1D	P16402	P16402	Histone H1.3	8	7	25.3	19	22.35	0	64.088	60916000000	175	4.66228	6.03498	ctrl_spe	5.67592	0.000881356	6.14565	AD_spe	0.0891193	0.908833	0.137509		5.95429	0.000225352	4.88117	ctrl_spe	5.76709	0	4.98633	AD_spe	2.1783	0.0841143	1.06302	up1
RPL6	Q02878;F8VZ45;U3KQR5;F8VR69;F8VZA3;F8VWR1;F8VU16	Q02878	60S ribosomal protein L6	27	27	58	58	32.728	0	294.58	269840000000	699	3.79769	6.01319	ctrl_spe	5.69841	0.000912281	7.08839	AD_spe	0.244424	0.799281	0.413274		9.71256	0	7.48992	ctrl_spe	5.98525	0	4.03805	AD_spe	0.294833	0.713916	0.151256
HNRNPR	O43390;B4DT28;A0A286YEZ8	O43390;B4DT28	Heterogeneous nuclear ribonucleoprotein R	47	33	55.8	44.5	70.942	0	323.31	225400000000	1086	7.16946	5.91893	ctrl_spe	5.90503	0.000489796	9.41629	AD_spe	0.627658	0.568092	0.333477		9.58889	0	6.94976	ctrl_spe	9.15225	0	6.95237	AD_spe	0.523786	0.535727	-0.153725
HNRNPA3	P51991;H7C1J8	P51991	Heterogeneous nuclear ribonucleoprotein A3	31	31	57.4	57.4	39.594	0	323.31	95899000000	478	5.11058	5.89277	ctrl_spe	12.1082	0	8.97849	AD_spe	0.374176	0.714	0.222122		10.2322	0	5.1907	ctrl_spe	5.64818	0	5.03559	AD_spe	3.16376	0.0231429	0.446926	up0.3
STAU2	Q9NUL3;E7EPX0;E7EVJ4;E5RJN7;E7EVI1;E5RJ67;H0YBY0;E5RFK1;E5RGT3;E5RGQ5	Q9NUL3;E7EPX0;E7EVJ4;E5RJN7;E7EVI1	Double-stranded RNA-binding protein Staufen homolog 2	34	29	58.4	55.4	62.608	0	323.31	25874000000	484	10.2475	5.57595	ctrl_spe	7.32978	0	6.69861	AD_spe	0.930691	0.428409	0.294628		9.22457	0	4.12427	ctrl_spe	6.13178	0	4.33985	AD_spe	3.08622	0.0243871	0.54515	up0.5
ZNF326	Q5BKZ1;A0A0A0MRN4	Q5BKZ1;A0A0A0MRN4	DBIRD complex subunit ZNF326	20	20	41.6	41.6	65.653	0	168.04	12196000000	294	8.45488	5.51784	ctrl_spe	6.49468	0	4.94821	AD_spe	0.394995	0.690572	0.164717		3.7183	0.00130612	2.7448	ctrl_spe	7.91394	0	3.61106	AD_spe	1.53217	0.180333	0.785097	up0.5
RPS24	E7ETK0;A0A2R8Y849;A0A2R8YD14;P62847;A0A2R8Y8A0	E7ETK0;A0A2R8Y849;A0A2R8YD14;P62847	40S ribosomal protein S24	11	11	53.4	53.4	15.197	0	76.108	59242000000	200	4.58507	5.44387	ctrl_spe	4.32656	0.00131313	3.48887	AD_spe	0.204791	0.836035	0.26906		4.81287	0.000485981	4.63429	ctrl_spe	3.77197	0.00172121	4.17016	AD_spe	0.795362	0.400223	0.651992
DHX30	Q7L2E3;H7BXY3;F6R0H4	Q7L2E3;H7BXY3	Putative ATP-dependent RNA helicase DHX30	53	53	44.2	44.2	133.94	0	189.44	33773000000	634	7.12965	5.43139	ctrl_spe	6.73637	0	5.85045	AD_spe	0.909099	0.4394	0.384881		9.67261	0	4.41294	ctrl_spe	6.32595	0	4.24207	AD_spe	2.06917	0.0884706	0.281281
ZFR	Q96KR1;H0Y8W1	Q96KR1	Zinc finger RNA-binding protein	34	34	30.1	30.1	117.01	0	323.31	12316000000	374	6.39939	5.31613	ctrl_spe	4.90713	0.00102994	5.30117	AD_spe	1.65852	0.243696	0.757779	up0.5	2.09955	0.011776	1.81103	ctrl_spe	3.23022	0.0032	2.8762	AD_spe	1.27315	0.251444	0.950269
FAU	P62861;E9PR30;E9PM49	P62861;E9PR30	40S ribosomal protein S30	6	6	33.9	33.9	6.6478	0	17.857	73208000000	144	4.42277	5.23873	ctrl_spe	3.81732	0.00219835	4.27486	AD_spe	0.644177	0.560779	0.587709		1.84407	0.0185755	1.99158	ctrl_spe	4.38427	0.000962406	3.9263	AD_spe	1.01146	0.330733	0.835592
HNRNPDL	A0A087WUK2;O14979	A0A087WUK2;O14979	Heterogeneous nuclear ribonucleoprotein D-like	22	22	59.2	59.2	40.04	0	145.19	45436000000	405	8.13934	5.2382	ctrl_spe	4.40784	0.00126316	5.22488	AD_spe	0.0348592	0.967124	-0.0198765		9.15974	0	4.86036	ctrl_spe	6.46157	0	4.83946	AD_spe	2.27438	0.0761935	-0.326408	down0.3
RPL27A	E9PLL6;P46776;E9PJD9;E9PLX7;H0YF34	E9PLL6;P46776;E9PJD9	60S ribosomal protein L27a	7	7	62	62	12.201	0	28.831	100500000000	162	3.77844	5.19073	ctrl_spe	7.32436	0	6.21224	AD_spe	0.478345	0.636216	0.621496		5.55044	0.000413793	5.27306	ctrl_spe	4.85879	0.000271845	2.90611	AD_spe	0.949649	0.344554	0.703183
RPL36A;RPL36A-HNRNPH2	J3KQN4;P83881;H0Y5B4;H7BZ11;H7BY91;H0Y3V9;R4GN19	J3KQN4;P83881;H0Y5B4;H7BZ11;H7BY91;H0Y3V9	60S ribosomal protein L36a	15	5	39.4	8.5	16.378	0	71.31	26848000000	179	5.91995	5.18109	ctrl_spe	8.64918	0	5.73101	AD_spe	0.780175	0.504543	0.492071		5.12506	0.00052	4.01346	ctrl_spe	4.74859	0.000259259	4.3416	AD_spe	0.119002	0.868868	0.123587
RPL17;RPL17-C18orf32	A0A087WXM6;J3QQT2;J3KRX5;A0A0A6YYL6;P18621;J3QLC8;A0A0A0MRF8;J3KRB3;A0A087WWH0;J3QS96;A0A087WY81;J3KSJ0	A0A087WXM6;J3QQT2;J3KRX5;A0A0A6YYL6;P18621;J3QLC8;A0A0A0MRF8;J3KRB3;A0A087WWH0;J3QS96;A0A087WY81	60S ribosomal protein L17	17	17	68	68	19.586	0	101.48	102130000000	326	2.98439	5.12723	ctrl_spe	7.18305	0	7.23226	AD_spe	1.29881	0.307486	1.29008	up1	3.97728	0.00100763	4.88051	ctrl_spe	5.73767	0	3.88478	AD_spe	0.70437	0.438431	0.6447
RPL35	P42766;F2Z388	P42766;F2Z388	60S ribosomal protein L35	11	11	52	52	14.551	0	226.92	179950000000	307	3.63091	5.12188	ctrl_spe	5.10698	0.000688742	5.67118	AD_spe	1.14079	0.345749	1.03623		5.4664	0.000494382	3.45394	ctrl_spe	5.65797	0	3.06272	AD_spe	0.830837	0.385312	-0.428849
RPL29	A0A3B3ITT5;P47914;F8WF43;C9IYI4	A0A3B3ITT5;P47914	60S ribosomal protein L29	6	6	26.3	26.3	18.512	0	17.276	139000000000	192	5.67599	5.08289	ctrl_spe	6.08761	0.000516129	7.33553	AD_spe	2.10728	0.19312	0.802145	up0.5	7.38701	0	5.43764	ctrl_spe	6.51926	0	3.98142	AD_spe	2.59932	0.049	0.949403	up0.5
ILF3	Q12906;K7EKJ9;K7EQR9;K7ER69;K7EM82;K7EJ09;K7ERM6;K7ENK6;K7ELV3;K7EKY0;K7EQ75	Q12906	Interleukin enhancer-binding factor 3	53	47	58.9	57	95.337	0	323.31	125740000000	985	8.57115	5.0784	ctrl_spe	10.6919	0	8.60654	AD_spe	0.350617	0.729372	-0.141046		11.1201	0	6.19488	ctrl_spe	8.01291	0	5.76358	AD_spe	0.174343	0.816554	0.0535114
RPS6	P62753;A2A3R5;A2A3R7	P62753;A2A3R5	40S ribosomal protein S6	23	23	47.8	47.8	28.68	0	247.48	181520000000	520	4.06748	5.0541	ctrl_spe	6.78115	0	7.51333	AD_spe	0.886209	0.451821	0.748112		3.81489	0.00121127	4.58218	ctrl_spe	5.50908	0	3.26408	AD_spe	0.388573	0.620712	0.269966
HNRNPUL1	Q9BUJ2;A0A0A0MRA5;B7Z4B8;M0R3F1;M0QYZ0;M0QZV6;M0R0K8;M0R203;M0QYI8;M0R247;A0A087X1I2;M0QYM5	Q9BUJ2;A0A0A0MRA5;B7Z4B8;M0R3F1;M0QYZ0	Heterogeneous nuclear ribonucleoprotein U-like protein 1	27	27	30.3	30.3	95.737	0	323.31	28085000000	360	10.04	5.03537	ctrl_spe	5.87904	0.000475248	6.09796	AD_spe	0.128474	0.878835	0.0422011		8.73948	0	3.50397	ctrl_spe	5.73204	0	4.31831	AD_spe	0.237586	0.777007	-0.0705557
TRA2B	P62995;H7BXF3;H7C2L4	P62995;H7BXF3;H7C2L4	Transformer-2 protein homolog beta	18	14	34	30.9	33.665	0	53.968	19776000000	212	9.12621	4.96375	ctrl_spe	6.70167	0	5.90394	AD_spe	1.63644	0.243667	0.49399	up0.3	4.32848	0.000547009	3.04709	ctrl_spe	3.61716	0.00217544	2.5561	AD_spe	1.04258	0.315412	-0.401009
HNRNPD	Q14103;H0Y8G5;H0YA96;D6RAF8;D6RF44;D6RD83	Q14103;H0Y8G5;H0YA96;D6RAF8;D6RF44	Heterogeneous nuclear ribonucleoprotein D0	24	14	45.6	29.9	38.434	0	323.31	42309000000	343	6.19381	4.87741	ctrl_spe	7.64714	0	6.74419	AD_spe	0.923488	0.429697	0.304551		9.38174	0	4.49495	ctrl_spe	3.37391	0.0028172	3.08471	AD_spe	3.29755	0.019	-1.05111	down1
RPS2	P15880;H0YEN5;E9PQD7;E9PMM9;I3L404;E9PPT0;E9PM36;H3BNG3;H0YE27	P15880;H0YEN5;E9PQD7;E9PMM9;I3L404	40S ribosomal protein S2	17	17	54.9	54.9	31.324	0	40.511	123400000000	312	4.13126	4.85771	ctrl_spe	10.6702	0	7.32311	AD_spe	0.767675	0.511521	0.558039		3.59074	0.00161039	3.4251	ctrl_spe	4.40277	0.000969697	3.73431	AD_spe	0.697763	0.437717	0.653514
IGF2BP1	Q9NZI8	Q9NZI8	Insulin-like growth factor 2 mRNA-binding protein 1	37	34	54.6	49.9	63.48	0	323.31	137830000000	669	3.55505	4.83869	ctrl_spe	4.54788	0.00115217	5.70112	AD_spe	0.557386	0.610688	0.759622		6.14938	0.000242424	5.77904	ctrl_spe	7.31414	0	6.34669	AD_spe	1.0811	0.306631	0.709862
MRPS22	G5E9W7;G5E9V5;P82650;H7C5L9;H7C5F2;C9J5D8	G5E9W7;G5E9V5;P82650;H7C5L9	28S ribosomal protein S22, mitochondrial	23	10	58.6	22.9	36.805	0	79.308	9006600000	296	7.99175	4.75048	ctrl_spe	3.48079	0.0027218	4.05529	AD_spe	0.992353	0.40247	-0.572207		1.66072	0.0280137	2.53058	ctrl_spe	1.49287	0.0455657	1.39194	AD_spe	0.890389	0.36938	-1.14184
ILF2	B4DY09;Q12905;X6R6Z1;A0A0A0MRL0	B4DY09;Q12905	Interleukin enhancer-binding factor 2	15	15	40.1	40.1	38.91	0	78.422	19713000000	289	3.98499	4.73889	ctrl_spe	4.55339	0.00115847	4.7644	AD_spe	0.0128144	0.991193	-0.0191614		5.30265	0.000494845	3.02534	ctrl_spe	4.05865	0.00115068	3.17728	AD_spe	0.497076	0.549246	-0.290609
RSL1D1	O76021;J3QSV6;I3L3U9;I3L3C4;I3L1A3;I3L234;J3KPU7;I3L2F2;I3L4T8;I3L1Y4	O76021;J3QSV6	Ribosomal L1 domain-containing protein 1	33	33	50.6	50.6	54.972	0	323.31	83819000000	558	2.63297	4.69616	ctrl_spe	7.74181	0	6.47899	AD_spe	0.761792	0.514657	1.14933		7.87887	0	5.65627	ctrl_spe	6.33605	0	6.07891	AD_spe	0.178032	0.812265	0.10624
RPL15	P61313;E7EQV9;A0A2R8YEM3;E7ENU7;E7EX53;A0A2R8Y738;E7ERA2	P61313;E7EQV9;A0A2R8YEM3;E7ENU7;E7EX53;A0A2R8Y738	60S ribosomal protein L15;Ribosomal protein L15	18	18	59.8	59.8	24.146	0	151.17	93463000000	295	3.30305	4.67021	ctrl_spe	5.50169	0.0008125	5.71228	AD_spe	0.246721	0.801543	0.363354		5.45238	0.000488889	4.87924	ctrl_spe	9.04438	0	6.34013	AD_spe	1.09186	0.305213	0.383108
RPL10A	P62906	P62906	60S ribosomal protein L10a	17	17	47	47	24.831	0	111.26	142460000000	330	2.41752	4.66894	ctrl_spe	5.60474	0.000859504	5.29412	AD_spe	0.154367	0.864447	0.335731		7.69382	0	5.88536	ctrl_spe	6.29184	0	5.02468	AD_spe	1.38048	0.219195	0.488358	up0.3
SNRNP70	P08621;M0QYR1;M0QX04	P08621	U1 small nuclear ribonucleoprotein 70 kDa	20	20	37.8	37.8	51.556	0	96.683	14910000000	290	8.14473	4.65426	ctrl_spe	4.75314	0.00100585	4.82082	AD_spe	1.3609	0.289496	0.54749	up0.5	7.20178	0	3.33748	ctrl_spe	5.04211	0.00028866	3.36202	AD_spe	2.12769	0.0855584	0.488997	up0.3
RPS8	P62241;Q5JR95	P62241;Q5JR95	40S ribosomal protein S8	16	16	53.8	53.8	24.205	0	200.57	292650000000	538	3.94583	4.64445	ctrl_spe	9.15374	0	7.81835	AD_spe	0.600353	0.571781	0.636626		7.19077	0	4.8387	ctrl_spe	5.88673	0	4.09145	AD_spe	0.0467953	0.9445	0.031631
H1FX	Q92522	Q92522	Histone H1x	24	24	62	62	22.487	0	255.52	789630000000	860	4.67622	4.62868	ctrl_spe	7.64979	0	10.4658	AD_spe	0.86531	0.464446	0.703446		10.2234	0	5.96017	ctrl_spe	8.16675	0	6.61981	AD_spe	2.87779	0.0317895	0.566424	up0.5
HNRNPC	B2R5W2;B4DY08;G3V4W0;G3V4C1;P07910;G3V2Q1;G3V576;G3V2D6;G3V555;G3V575;G3V5V7;G3V251;B2RXH8;O60812;A0A0G2JNQ3;G3V3K6;G3V5X6;B7ZW38;A0A0G2JPF8;P0DMR1;B4DSU6;G3V4M8;G3V2H6	B2R5W2;B4DY08;G3V4W0;G3V4C1;P07910;G3V2Q1;G3V576;G3V2D6;G3V555;G3V575;G3V5V7	Heterogeneous nuclear ribonucleoproteins C1/C2	29	28	61	58.3	31.948	0	260.39	261790000000	692	8.23747	4.61212	ctrl_spe	7.32903	0	5.75159	AD_spe	1.45775	0.277467	-0.412943	down0.3	6.0485	0.000228571	6.09187	ctrl_spe	7.90754	0	4.28272	AD_spe	0.250689	0.766819	0.115395
DDX21	Q9NR30	Q9NR30	Nucleolar RNA helicase 2	43	41	44.2	42.3	87.343	0	297.06	33417000000	547	4.8782	4.60304	ctrl_spe	8.44194	0	5.29445	AD_spe	1.29479	0.30616	0.676676		6.86826	0.000163265	4.02264	ctrl_spe	7.96292	0	4.45422	AD_spe	0.200008	0.809264	0.0960817
EHMT1	Q9H9B1;A0A1B0GV09;A0A1B0GU48;A0A0C4DGF8;A0A1B0GUD1;A0A1B0GVZ8;A0A0D9SEQ1;A0A1W2PPZ7;A0A1B0GWF6;A0A1B0GW79;A0A0D9SFX4;A0A0D9SER9;A0A1B0GW12;A0A1B0GV89;A0A0D9SF38;A0A1B0GTP4;A0A0D9SFG7;A0A0D9SER3;A0A0D9SFS4;A0A0D9SEP2;A0A0D9SFD7;A0A0D9SFM6;A0A0D9SEY2	Q9H9B1;A0A1B0GV09;A0A1B0GU48;A0A0C4DGF8	Histone-lysine N-methyltransferase EHMT1	37	36	32.6	32	141.46	0	273.68	14713000000	296	6.46644	4.55733	ctrl_spe	5.7345	0.000678571	5.21103	AD_spe	0.10977	0.897685	-0.0852351		1.48674	0.0409338	2.81708	ctrl_spe	4.714	0.000254545	2.9397	AD_spe	0.846442	0.378911	1.24927
RPL31	P62899;H7C2W9;C9JU56;B7Z4E3;B7Z4C8;B8ZZK4	P62899;H7C2W9;C9JU56;B7Z4E3;B7Z4C8;B8ZZK4	60S ribosomal protein L31	10	10	56.8	56.8	14.463	0	89.14	237750000000	232	6.06489	4.46465	ctrl_spe	10.1161	0	8.07202	AD_spe	2.16585	0.193244	0.936829	up0.5	6.42557	0.000140351	7.18429	ctrl_spe	7.271	0	4.38294	AD_spe	1.60312	0.168636	0.55548	up0.5
IGF2BP2	F8W930;Q9Y6M1	F8W930;Q9Y6M1	Insulin-like growth factor 2 mRNA-binding protein 2	31	31	46.1	46.1	66.785	0	275.27	40964000000	431	4.28375	4.43427	ctrl_spe	4.56624	0.00116484	5.35672	AD_spe	0.38667	0.701348	0.432894		6.21088	0.000246154	4.15734	ctrl_spe	5.48008	0	4.64734	AD_spe	1.20049	0.276207	0.583462
DDX3X	A0A2R8YFS5;A0A2R8Y4A4;O00571;A0A0D9SF53;A0A2U3TZJ9;A0A2R8YFR4;A0A0D9SG12;A0A2R8YCW1;A0A2R8YF78;A0A0D9SFB3;A0A2R8Y645;A0A2R8Y5G6;F6S8Q4;A0A2R8Y7T2;A0A2R8YDT5;A0A2R8YDH3;A0A0J9YVQ7;A0A087WVZ1;A0A2R8Y650;A0A2R8YCU0;A0A2R8YF89;A0A087WX09;A0A2R8Y4D2;D6RCM4;Q9NQI0	A0A2R8YFS5;A0A2R8Y4A4;O00571;A0A0D9SF53;A0A2U3TZJ9;A0A2R8YFR4;A0A0D9SG12;A0A2R8YCW1;A0A2R8YF78;A0A0D9SFB3;A0A2R8Y645;A0A2R8Y5G6;F6S8Q4;A0A2R8Y7T2;A0A2R8YDT5;A0A2R8YDH3	ATP-dependent RNA helicase DDX3X	25	8	34.9	12	73.155	0	106.64	21658000000	341	8.64009	4.42197	ctrl_spe	6.48267	0	4.39937	AD_spe	1.15832	0.342831	0.348662		5.78225	0.000486486	3.07617	ctrl_spe	5.42269	0	3.93707	AD_spe	0.320549	0.693728	-0.12448
RPL19	J3QR09;J3KTE4;P84098	J3QR09;J3KTE4;P84098	Ribosomal protein L19;60S ribosomal protein L19	23	23	58.5	58.5	23.134	0	186.02	223750000000	546	3.61066	4.40693	ctrl_spe	8.1148	0	8.10869	AD_spe	1.27023	0.313455	1.18717		3.72298	0.00131507	5.80431	ctrl_spe	4.91327	0.000277228	3.87173	AD_spe	0.320303	0.692746	0.459763
NOP56	O00567;A0A494C128;H0YDU4;H0Y653;Q5JXT2	O00567;A0A494C128;H0YDU4	Nucleolar protein 56	28	28	51.3	51.3	66.049	0	271.94	29628000000	393	3.13192	4.33389	ctrl_spe	8.88475	0	5.30086	AD_spe	1.44924	0.277475	1.29048	up1	8.57747	0	4.41997	ctrl_spe	6.20973	0	4.20018	AD_spe	2.90463	0.032	0.372013	up0.3
ADAR	P55265;A0A3B3IRQ9;A0A3B3ISX1;A0A3B3ITG9;A0A3B3ISU1	P55265;A0A3B3IRQ9	Double-stranded RNA-specific adenosine deaminase	45	45	35.4	35.4	136.06	0	214.48	15466000000	441	6.86771	4.33358	ctrl_spe	9.28908	0	3.74072	AD_spe	1.01639	0.396612	0.298719		6.98156	9.09091e-05	3.20555	ctrl_spe	3.9666	0.00149333	2.98072	AD_spe	0.517246	0.539874	-0.21341
RPS7	P62081;B5MCP9	P62081;B5MCP9	40S ribosomal protein S7	17	6	58.8	22.7	22.127	0	323.31	88781000000	278	1.96047	4.33198	ctrl_spe	6.51388	0	6.65958	AD_spe	0.927468	0.429356	1.60749		5.69304	0.000461538	5.39696	ctrl_spe	5.19038	0	4.87822	AD_spe	0.109491	0.877169	0.110521
RPL3	P39023;G5E9G0;H7C422;H7C3M2;Q92901	P39023;G5E9G0;H7C422	60S ribosomal protein L3	39	13	62	17.6	46.108	0	323.31	324350000000	629	2.52927	4.27804	ctrl_spe	5.88583	0.000484848	6.57007	AD_spe	0.879353	0.457328	1.16058		9.60914	0	7.74991	ctrl_spe	9.02611	0	6.93901	AD_spe	0.431601	0.591508	0.195107
HP1BP3	Q5SSJ5;B0QZK4;Q5SWC8;B0QZK9;B0QZK8	Q5SSJ5;B0QZK4;Q5SWC8	Heterochromatin protein 1-binding protein 3	34	34	40.7	40.7	61.206	0	131.99	95231000000	594	4.34243	4.27759	ctrl_spe	8.56982	0	7.20625	AD_spe	1.80289	0.22161	1.20609	up1	6.93415	8.51064e-05	5.2734	ctrl_spe	6.7498	0	4.9162	AD_spe	1.73737	0.144	0.780248	up0.5
HNRNPU	Q00839;A0A1X7SBS1;A0A1W2PRI6	Q00839;A0A1X7SBS1	Heterogeneous nuclear ribonucleoprotein U	52	4	44.8	2.9	90.583	0	323.31	573970000000	1310	6.8719	4.24499	ctrl_spe	9.90054	0	4.30587	AD_spe	1.08887	0.367482	0.423947		9.3179	0	3.79593	ctrl_spe	5.31929	0	4.40488	AD_spe	3.01607	0.028625	0.446399	up0.3
RPL22	K7ERI7;P35268;K7EMH1;K7ELC4;K7EP65;K7EKS7;K7EJT5;C9JYQ9;H0Y8C2;Q6P5R6	K7ERI7;P35268;K7EMH1;K7ELC4;K7EP65;K7EKS7	60S ribosomal protein L22	8	8	65.3	65.3	11.168	0	105.09	98623000000	233	3.75905	4.15648	ctrl_spe	6.66287	0	3.88548	AD_spe	1.07833	0.368406	0.727919		3.19616	0.00251685	3.43127	ctrl_spe	6.20841	0	3.19911	AD_spe	2.804	0.0357	1.32891	up1
RPS4X	P62701	P62701	40S ribosomal protein S4, X isoform	26	10	60.1	29.3	29.597	0	88.945	151730000000	458	2.56354	4.15567	ctrl_spe	5.71284	0.000920354	3.53887	AD_spe	0.328028	0.736103	0.470114		2.2903	0.00912069	3.28115	ctrl_spe	5.04123	0.000285714	3.61062	AD_spe	0.65606	0.462073	0.826521
HIST1H1C	P16403	P16403	Histone H1.2	24	8	46.9	15.5	21.364	0	268.67	1723300000000	1003	6.95345	4.1491	ctrl_spe	6.44439	0	6.11078	AD_spe	2.95132	0.10125	0.905292	up0.5	7.95044	0	2.41686	ctrl_spe	9.21906	0	4.07241	AD_spe	6.97175	0	1.04645	up1
HNRNPAB	D6R9P3;D6RD18;D6RBZ0;Q99729	D6R9P3;D6RD18;D6RBZ0;Q99729	Heterogeneous nuclear ribonucleoprotein A/B	20	20	46.8	46.8	30.302	0	89.14	32188000000	206	6.249	4.1343	ctrl_spe	7.21705	0	4.52082	AD_spe	0.716839	0.523729	-0.273697		7.84467	0	4.76578	ctrl_spe	5.24336	0	4.14484	AD_spe	0.338033	0.682703	-0.188194
HIST1H1B	P16401	P16401	Histone H1.5	14	14	27.4	27.4	22.58	0	244.01	371630000000	562	5.80702	4.08428	ctrl_spe	3.69738	0.00231076	7.72907	AD_spe	0.472303	0.641093	0.524697		5.20628	0.000489796	3.13009	ctrl_spe	4.01257	0.00133333	4.53397	AD_spe	1.28339	0.253006	0.836682
RBMX	P38159;H3BT71;H0Y6E7;H3BUY5;H3BR27;O75526;H3BNC1;Q8N7X1	P38159;H3BT71;H0Y6E7;H3BUY5	RNA-binding motif protein, X chromosome;RNA-binding motif protein, X chromosome, N-terminally processed	50	18	73.9	32	42.331	0	323.31	151820000000	1071	7.6096	3.97723	ctrl_spe	5.77046	0.000690909	7.1137	AD_spe	1.11082	0.358766	-0.244614		6.57093	0.000153846	4.99832	ctrl_spe	5.74394	0	4.27069	AD_spe	0.403784	0.609797	-0.251673
HNRNPL	P14866	P14866	Heterogeneous nuclear ribonucleoprotein L	27	6	50.4	10.4	64.132	0	323.31	49206000000	377	7.36537	3.97196	ctrl_spe	4.47339	0.0012766	5.74957	AD_spe	2.34845	0.167556	-0.338466	down0.3	3.8553	0.00118841	3.43027	ctrl_spe	4.61406	0.000470588	4.71788	AD_spe	0.491546	0.554626	0.47238
RPL26L1	Q9UNX3;E5RIT6;E5RHH1	Q9UNX3;E5RIT6	60S ribosomal protein L26-like 1	3	3	13.1	13.1	17.256	0	15.249	19274000000	93	2.20296	3.92923	ctrl_spe	5.3719	0.000776119	5.65048	AD_spe	1.21271	0.32788	1.539		5.68033	0.00045	3.4376	ctrl_spe	5.35543	0	3.41321	AD_spe	0.329505	0.687916	0.151856
IGF2BP3	O00425;F8WD15	O00425	Insulin-like growth factor 2 mRNA-binding protein 3	30	29	49.4	48.4	63.704	0	304.77	42921000000	402	1.88978	3.92655	ctrl_spe	6.81554	0	5.45257	AD_spe	0.689984	0.532681	1.19449		6.53782	0.000150943	4.35515	ctrl_spe	6.10323	0	5.31349	AD_spe	0.402426	0.609283	0.250519
RPL4	P36578;H3BM89;H3BTP7;H3BU31	P36578;H3BM89	60S ribosomal protein L4	42	42	63.9	63.9	47.697	0	323.31	185170000000	563	1.91666	3.92505	ctrl_spe	5.11532	0.000697987	7.36667	AD_spe	0.316598	0.746016	0.579396		5.30626	0.0005	4.77182	ctrl_spe	6.23254	0	3.51105	AD_spe	1.62007	0.166512	0.721067	up0.5
MRPL15	Q9P015;E5RIZ4;E5RHF4	Q9P015;E5RIZ4;E5RHF4	39S ribosomal protein L15, mitochondrial	19	19	66.9	66.9	33.419	0	71.755	9180900000	291	5.49244	3.83764	ctrl_spe	5.22514	0.000727273	4.36721	AD_spe	0.102028	0.901048	-0.0828214		3.54353	0.0016962	2.70589	ctrl_spe	3.12781	0.0041393	2.15025	AD_spe	0.91398	0.361876	-0.49331
H1F0	P07305	P07305	Histone H1.0;Histone H1.0, N-terminally processed	16	16	40.7	40.7	20.863	0	85.396	58068000000	252	2.68242	3.77279	ctrl_spe	1.45692	0.0297698	3.36579	AD_spe	1.45912	0.279025	2.02419	up1	2.9745	0.00311795	3.59413	ctrl_spe	3.40291	0.00289503	5.22893	AD_spe	0.792028	0.399325	1.03844
RPS9	P46781;B5MCT8;C9JM19;F2Z3C0;A8MXK4	P46781;B5MCT8;C9JM19	40S ribosomal protein S9	23	23	61.9	61.9	22.591	0	100.84	291340000000	681	2.54594	3.74593	ctrl_spe	6.49411	0	6.74183	AD_spe	1.38772	0.287489	1.10474	up1	5.70412	0.000467532	5.65792	ctrl_spe	7.29215	0	5.22643	AD_spe	0.343664	0.675706	0.286855
RPS3A	P61247;H0Y9Y4;E9PFI5;D6RAT0;H0Y8L7;D6R9B6;D6RI02;D6RAS7	P61247;H0Y9Y4;E9PFI5;D6RAT0;H0Y8L7;D6R9B6	40S ribosomal protein S3a	33	11	70.5	20.1	29.945	0	323.31	548480000000	817	2.47124	3.70474	ctrl_spe	9.9796	0	7.92227	AD_spe	1.00178	0.400168	1.19074		6.25602	0.000190476	6.89217	ctrl_spe	4.93914	0.00028	6.09321	AD_spe	0.508309	0.543385	0.377746
LARP7	Q4G0J3;H0YA82;D6RFF0;D6R9Z6;D6RF22;D6RF49;D6RAF3;D6RBH8	Q4G0J3;H0YA82	La-related protein 7	38	38	52.9	52.9	66.898	0	264.98	15189000000	353	10.599	3.68345	ctrl_spe	7.95623	0	4.0753	AD_spe	2.89953	0.101333	0.403243	up0.3	2.58731	0.00591705	2.89045	ctrl_spe	4.43054	0.000732824	3.52128	AD_spe	0.634501	0.474903	0.638476
SRPK2	P78362;C9J2M4;H7C5L6;C9JWF7;H7C521;F8WBW4;H7C2I2;E7ETV6;Q9UPE1	P78362	SRSF protein kinase 2;SRSF protein kinase 2 N-terminal;SRSF protein kinase 2 C-terminal	21	17	27.5	23.7	77.526	0	74.218	12833000000	226	2.19656	3.64842	ctrl_spe	7.92593	0	5.53676	AD_spe	1.77351	0.2256	2.01627	up1	7.59898	0	2.29022	ctrl_spe	3.82032	0.00174233	3.1947	AD_spe	6.99241	0	1.16148	up1
RPLP0;RPLP0P6	P05388;F8VU65;F8VWS0;F8VPE8;G3V210;F8VQY6;F8VRK7;F8VW21;Q8NHW5;F8VWV4;F8VS58;F8VZS0;F8W1K8	P05388;F8VU65;F8VWS0;F8VPE8;G3V210;F8VQY6;F8VRK7;F8VW21;Q8NHW5;F8VWV4;F8VS58;F8VZS0	60S acidic ribosomal protein P0;60S acidic ribosomal protein P0-like	13	13	47	47	34.273	0	146.52	47595000000	201	2.09344	3.5652	ctrl_spe	4.35421	0.00123077	4.4928	AD_spe	0.281262	0.768497	-0.491151		9.06545	0	4.49983	ctrl_spe	7.82356	0	4.84134	AD_spe	0.0276366	0.967085	-0.0120074
RPL10	F8W7C6;A0A087WV22;H7C123;H7C2C5;H7C2U2	F8W7C6;A0A087WV22;H7C123;H7C2C5		12	2	44.2	7.4	18.565	0	63.343	61203000000	262	1.73829	3.56288	ctrl_spe	3.97878	0.002	4.89049	AD_spe	0.407231	0.688782	0.740816		4.83018	0.000490566	4.77443	ctrl_spe	5.60008	0	4.26957	AD_spe	0.0198197	0.978855	0.024156
SF3B2	Q13435;E9PPJ0;H0YCG1;E9PJ04;E9PJT3;H0YEX5;E9PIL8	Q13435;E9PPJ0	Splicing factor 3B subunit 2	37	37	48.7	48.7	100.23	0	323.31	21988000000	453	5.11533	3.5567	ctrl_spe	6.53946	0	4.32724	AD_spe	1.08416	0.367774	0.522831		8.07581	0	3.82294	ctrl_spe	5.79918	0	4.02974	AD_spe	0.459162	0.570933	0.139926
RPL27	P61353;K7ELC7;K7EQQ9;K7ERY7	P61353;K7ELC7	60S ribosomal protein L27	12	12	60.3	60.3	15.798	0	101.14	105260000000	315	2.53267	3.52947	ctrl_spe	2.95197	0.00447525	4.64754	AD_spe	0.108577	0.897339	-0.175866		4.25931	0.000622951	3.02055	ctrl_spe	4.51582	0.000440945	5.22677	AD_spe	0.787789	0.397184	0.438745
CHTOP	Q9Y3Y2;A0A087X1B7;X6R700;Q5T7Y7	Q9Y3Y2;A0A087X1B7;X6R700	Chromatin target of PRMT1 protein	8	8	33.5	33.5	26.396	0	93.297	34686000000	189	4.0358	3.41458	ctrl_spe	8.87436	0	3.42816	AD_spe	0.286157	0.76497	0.251987		6.07269	0.000238806	4.02276	ctrl_spe	6.94087	0	4.5738	AD_spe	1.53429	0.181577	0.588236	up0.5
STAU1	O95793;Q5JW30;A0A087X1A5;F6UDC6	O95793;Q5JW30;A0A087X1A5	Double-stranded RNA-binding protein Staufen homolog 1	28	19	52.5	36.2	63.182	0	173	20927000000	409	2.32361	3.39364	ctrl_spe	3.92522	0.00194828	3.60494	AD_spe	0.343959	0.733377	0.507338		9.47603	0	3.86779	ctrl_spe	5.75318	0	3.91506	AD_spe	0.176979	0.813065	-0.0618706
H2AFY2	Q9P0M6;Q5SQT3	Q9P0M6;Q5SQT3	Core histone macro-H2A.2;Histone H2A	20	18	53.8	46.8	40.058	0	235.05	38560000000	324	2.07947	3.36701	ctrl_spe	6.38896	0.00064	4.85148	AD_spe	1.00216	0.401728	1.26356		6.51665	0.000148148	4.23898	ctrl_spe	4.30157	0.000941176	4.47426	AD_spe	0.189973	0.809626	-0.140568
LSM14B	Q9BX40;Q5TBQ0;Q5TBQ1;A0A0C4DFV2	Q9BX40;Q5TBQ0;Q5TBQ1	Protein LSM14 homolog B	14	5	39.2	15.1	42.07	0	204.99	9031500000	172	2.42888	3.36508	ctrl_spe	5.30512	0.000753623	5.02785	AD_spe	0.278521	0.770109	0.417623		2.65782	0.00513208	1.69986	ctrl_spe	4.43493	0.000744186	2.26327	AD_spe	1.37246	0.221358	0.666224	up0.5
H2AFY	O75367;B4DJC3;D6RCF2	O75367;B4DJC3	Core histone macro-H2A.1;Histone H2A	10	10	32.3	32.3	39.617	0	243.19	18932000000	184	1.94787	3.34944	ctrl_spe	5.88034	0.00048	4.18649	AD_spe	0.229746	0.814552	0.40465		5.37148	0.000510638	2.65237	ctrl_spe	2.46532	0.010378	2.84393	AD_spe	1.72092	0.144542	-0.947757	down0.5
PRCP	P42785;E9PNF7;E9PQB5;E9PL85;E9PQN3;E9PKN6;E9PIG4;E9PNJ1;E9PL49;E9PLY4	P42785;E9PNF7;E9PQB5;E9PL85;E9PQN3;E9PKN6;E9PIG4	Lysosomal Pro-X carboxypeptidase	10	10	15.3	15.3	55.799	0	27.178	5219700000	132	2.696	3.21146	ctrl_spe	6.04979	0.000505263	3.16856	AD_spe	0.0808504	0.912326	0.11671		1.8517	0.0183971	1.37145	ctrl_spe	1.99594	0.0194	2.21589	AD_spe	0.543913	0.530047	-0.405839
DHX15	O43143	O43143	Pre-mRNA-splicing factor ATP-dependent RNA helicase DHX15	25	25	28.4	28.4	90.932	0	83.953	8612200000	261	5.33602	3.21099	ctrl_spe	7.62429	0	4.48877	AD_spe	1.78171	0.228103	0.710379	up0.5	4.23821	0.000612903	1.96125	ctrl_spe	7.31357	0	2.78138	AD_spe	0.753067	0.408621	0.188989
FBL	P22087;M0R299;M0QXL5;M0R0P1;M0R2Q4;M0R2U2;M0R1H0;M0R2B0	P22087;M0R299;M0QXL5;M0R0P1;M0R2Q4	rRNA 2-O-methyltransferase fibrillarin	14	13	41.7	38.3	33.784	0	94.17	25596000000	238	3.90068	3.03497	ctrl_spe	6.70869	0	3.31829	AD_spe	0.735078	0.518272	0.494708		3.62918	0.00157895	3.16929	ctrl_spe	2.81016	0.0064	2.42461	AD_spe	0.514031	0.541429	0.267682
RPL5	P46777;A0A2R8Y6J3;Q5T7N0;A0A2R8Y4A2;R4GNJ2	P46777;A0A2R8Y6J3	60S ribosomal protein L5	17	17	42.1	42.1	34.362	0	70.964	13223000000	237	4.59911	3.02683	ctrl_spe	4.2821	0.00139303	4.68463	AD_spe	1.68478	0.245149	0.984128	up0.5	4.71204	0.000518519	2.83852	ctrl_spe	4.10019	0.00115862	3.2944	AD_spe	0.760832	0.407592	0.314319
RPL7	P18124;A8MUD9;C9JIJ5;C9JZ88	P18124;A8MUD9	60S ribosomal protein L7	25	25	65.3	65.3	29.225	0	273.7	299240000000	585	1.59287	2.97347	ctrl_spe	6.89311	0	6.76002	AD_spe	0.466508	0.643564	0.788857		8.10998	0	4.64626	ctrl_spe	5.79517	0	4.00571	AD_spe	0.58593	0.502205	0.270785
RPL7A	P62424;Q5T8U3;Q5T8U2	P62424;Q5T8U3	60S ribosomal protein L7a	26	26	56	56	29.995	0	289.51	254380000000	451	1.66059	2.90761	ctrl_spe	6.48595	0	7.31694	AD_spe	0.412604	0.687149	0.680511		7.16599	0	6.24873	ctrl_spe	6.80198	0	4.28198	AD_spe	1.2303	0.269557	0.435418
SF3B1	O75533;H7C341;B4DGZ4;A0A494C1M2;F8WC19	O75533	Splicing factor 3B subunit 1	39	39	35.9	35.9	145.83	0	242.42	6317600000	296	1.70771	2.86464	ctrl_spe	5.59134	0.000852459	4.18264	AD_spe	1.2118	0.324429	1.47708		4.18215	0.000704	2.06361	ctrl_spe	3.92945	0.0016732	1.64163	AD_spe	0.560172	0.517948	-0.244047
DDX5	P17844;J3KTA4;J3QRQ7;J3QSF1;J3KRZ1;J3QR02;J3KRX8;J3KTQ4;X6RLV5;J3QKN9;J3QS79;J3QRN5	P17844;J3KTA4	Probable ATP-dependent RNA helicase DDX5	44	34	51.8	41.5	69.147	0	165.85	167010000000	824	6.16193	2.82318	ctrl_spe	6.26551	0.000578313	3.34825	AD_spe	0.100428	0.902911	-0.0522828		4.0986	0.000850394	3.77101	ctrl_spe	5.32891	0	6.27852	AD_spe	0.872758	0.377606	0.654234
HNRNPA2B1	P22626;A0A087WUI2	P22626;A0A087WUI2	Heterogeneous nuclear ribonucleoproteins A2/B1	32	32	69.7	69.7	37.429	0	323.31	377780000000	895	3.18263	2.78565	ctrl_spe	8.13752	0	4.38603	AD_spe	0.184987	0.85106	-0.182136		7.5802	0	4.49671	ctrl_spe	7.93775	0	4.11048	AD_spe	0.0900803	0.895894	0.037758
MRPL3	H0Y9G6;E7ETU7;P09001;D6RC14;E9PF06	H0Y9G6;E7ETU7;P09001;D6RC14;E9PF06	39S ribosomal protein L3, mitochondrial	8	8	23.7	23.7	40.47	0	65.82	4972500000	138	2.08438	2.77686	ctrl_spe	1.89148	0.0130435	3.23457	AD_spe	0.18037	0.853618	-0.339258		4.58808	0.0005	2.85514	ctrl_spe	2.55698	0.00868016	1.51303	AD_spe	3.17096	0.0234074	-1.25257	down1
MYBBP1A	Q9BQG0;I3L1L3;I3L2H8	Q9BQG0;I3L1L3	Myb-binding protein 1A	36	36	28.5	28.5	148.85	0	100.14	5349800000	189	2.15638	2.73968	ctrl_spe	4.02004	0.00188341	3.46036	AD_spe	0.779987	0.502918	0.871597		2.51282	0.00658182	1.0984	ctrl_spe	2.94347	0.00576744	1.55253	AD_spe	0.012792	0.982501	0.00815678
NOP58	Q9Y2X3;F8WED0;H7BZ72	Q9Y2X3	Nucleolar protein 58	21	21	41.4	41.4	59.578	0	176.79	14709000000	238	1.98082	2.68196	ctrl_spe	6.58174	0	3.61196	AD_spe	0.94316	0.424852	0.993084		6.29279	0.000129032	2.94361	ctrl_spe	4.73545	0.000256881	3.74308	AD_spe	0.336313	0.683961	0.148088
HNRNPK	P61978;S4R457;S4R359	P61978	Heterogeneous nuclear ribonucleoprotein K	24	5	55.7	11	50.976	0	183.31	56121000000	474	7.41188	2.47988	ctrl_spe	3.45054	0.00269145	3.50995	AD_spe	1.82229	0.231493	-0.321699	down0.3	8.13315	0	4.88364	ctrl_spe	3.38253	0.00286339	2.83842	AD_spe	0.284291	0.722664	-0.144737
HNRNPH3	P31942	P31942	Heterogeneous nuclear ribonucleoprotein H3	13	13	58.4	58.4	36.926	0	270.4	19235000000	241	4.68057	2.30167	ctrl_spe	4.05454	0.00188991	3.10032	AD_spe	2.97308	0.107714	-0.841025	down0.5	5.11828	0.000514851	3.47078	ctrl_spe	3.03497	0.00423077	3.31442	AD_spe	0.0292478	0.967563	-0.0257005
RPS23	P62266;D6RD47;D6RDJ2;D6RIX0;D6R9I7	P62266;D6RD47;D6RDJ2;D6RIX0;D6R9I7	40S ribosomal protein S23	8	8	37.1	37.1	15.807	0	23.552	64134000000	224	3.10443	2.28381	ctrl_spe	8.32875	0	3.26251	AD_spe	0.805234	0.487737	0.503012		1.51216	0.0379556	1.98606	ctrl_spe	3.73167	0.00169048	3.66446	AD_spe	0.849701	0.378627	0.887211
SRSF9	Q13242;H0YIB4;S4R3G0	Q13242;H0YIB4;S4R3G0	Serine/arginine-rich splicing factor 9	9	9	41.2	41.2	25.542	0	21.901	4020200000	112	5.17717	2.25523	ctrl_spe	3.85063	0.00210084	3.07805	AD_spe	0.0589292	0.939646	-0.0254773		3.88885	0.00117647	1.44276	ctrl_spe	4.36737	0.000955224	1.21666	AD_spe	2.53582	0.0548	-0.608694	down0.5
RPS14	P62263;A0A2R8Y811;E5RH77	P62263;A0A2R8Y811;E5RH77	40S ribosomal protein S14	11	11	43	43	16.273	0	209.04	135310000000	376	1.31804	2.24186	ctrl_spe	5.05351	0.0008	2.96453	AD_spe	0.155189	0.864429	0.271809		2.18115	0.0108235	2.94316	ctrl_spe	6.80626	0	2.40754	AD_spe	0.823837	0.386197	0.912346
RRP12	Q5JTH9;A0A087X0G0;A0A087X1U8;H7C1M8	Q5JTH9	RRP12-like protein	22	21	18.1	18.1	143.7	0	59.574	6090900000	180	3.45264	2.21169	ctrl_spe	4.04418	0.00191781	2.73592	AD_spe	1.90564	0.2185	0.889406	up0.5	4.32637	0.000542373	1.50744	ctrl_spe	1.70697	0.0313865	2.22073	AD_spe	1.28181	0.252682	0.440948
SUGP2	M0R2Z9;Q8IX01;M0R3F6;M0R216;M0R065;M0R2Y3	M0R2Z9;Q8IX01;M0R3F6	SURP and G-patch domain-containing protein 2	32	32	30.6	30.6	121.54	0	227.9	7738600000	337	4.05814	2.1799	ctrl_spe	5.85356	0.000730769	4.39619	AD_spe	2.80549	0.103455	0.685478	up0.5	4.97261	0.000504854	2.84328	ctrl_spe	6.42846	0	2.99333	AD_spe	0.20531	0.805592	-0.122231
DDX17	A0A1X7SBZ2;A0A5H1ZRQ2;Q92841;A0A0U1RQJ0	A0A1X7SBZ2;A0A5H1ZRQ2;Q92841	Probable ATP-dependent RNA helicase DDX17	33	33	43.9	43.9	80.253	0	323.31	94601000000	619	10.9157	2.14097	ctrl_spe	6.23129	0.000551724	2.40084	AD_spe	0.651852	0.552793	-0.0963		4.71101	0.000513761	2.06369	ctrl_spe	6.63263	0	2.53326	AD_spe	0.887408	0.369147	0.314063
LARP1	Q6PKG0;A0A0B4J210;E5RH50;H0YC33;H0YBW1;E5RHK4;H0YAN4;H0YBM7;H0YC73;A0A3B3ISF0;Q659C4;H0YBR8;H0YAX9	Q6PKG0;A0A0B4J210	La-related protein 1	28	28	32	32	123.51	0	112.68	5032900000	151	2.34324	2.13993	ctrl_spe	3.82093	0.00215768	2.60805	AD_spe	0.711788	0.524064	0.560142		2.95727	0.00324873	1.62703	ctrl_spe	3.87244	0.00164103	1.50661	AD_spe	0.18912	0.809848	0.113697
MYEF2	A0A0A0MR39;A0A087WUT0;Q9P2K5	A0A0A0MR39;A0A087WUT0;Q9P2K5	Myelin expression factor 2	32	2	53.8	7.5	64.149	0	241.54	19362000000	365	2.59788	2.10471	ctrl_spe	2.7923	0.0050828	1.33633	AD_spe	0.218688	0.826721	-0.207892		8.03598	0	3.33167	ctrl_spe	3.95785	0.00148344	3.29739	AD_spe	1.22108	0.270766	0.297688
DDX50	Q9BQ39;A0A087WVC1	Q9BQ39;A0A087WVC1	ATP-dependent RNA helicase DDX50	23	23	28.4	28.4	82.564	0	67.097	14775000000	282	1.42647	2.04536	ctrl_spe	6.07215	0.000510638	4.11369	AD_spe	1.66519	0.245956	1.33122	up1	4.17638	0.000793651	3.40748	ctrl_spe	6.13854	0	3.84203	AD_spe	0.914863	0.363853	0.577535
HNRNPF	P52597;A0A1B0GW42	P52597	Heterogeneous nuclear ribonucleoprotein F;Heterogeneous nuclear ribonucleoprotein F, N-terminally processed	9	9	23.6	23.6	45.671	0	152.32	9113100000	137	1.77591	2.03128	ctrl_spe	2.61233	0.00608333	2.99899	AD_spe	0.0827797	0.909598	-0.0963651		3.55227	0.00165605	2.14771	ctrl_spe	5.56853	0	3.242	AD_spe	0.928408	0.357274	0.50537
DDX24	G3V529;Q9GZR7;F5GYL3;A0A087WXU8;A0A1W2PRR2	G3V529;Q9GZR7;F5GYL3;A0A087WXU8;A0A1W2PRR2	ATP-dependent RNA helicase DDX24	20	20	25.4	25.4	91.48	0	95.237	5203900000	206	1.46058	1.93157	ctrl_spe	3.55428	0.00254406	3.19672	AD_spe	1.44531	0.270571	1.20051	up1	3.04408	0.00283938	1.53275	ctrl_spe	6.29523	0	1.89139	AD_spe	1.36478	0.221238	0.484749	up0.3
FAM120A	Q9NZB2;A0A0C4DG79;A0A0C4DH52;A0A494C0Y9;Q5T035	Q9NZB2	Constitutive coactivator of PPAR-gamma-like protein 1	28	28	30.6	30.6	121.89	0	194.73	6544600000	233	1.45618	1.90345	ctrl_spe	5.59112	0.000845528	3.38525	AD_spe	1.21145	0.32284	1.1086		6.31858	0.000135593	2.69445	ctrl_spe	4.13574	0.00102778	2.18094	AD_spe	0.799823	0.398542	-0.143719
RPL24	P83731;C9JXB8;C9JNW5	P83731;C9JXB8;C9JNW5	60S ribosomal protein L24	19	19	66.9	66.9	17.779	0	60.258	72215000000	232	1.48492	1.89635	ctrl_spe	4.86623	0.00101176	5.7408	AD_spe	0.537274	0.615186	0.591915		3.43536	0.00196407	2.36811	ctrl_spe	2.19388	0.0153188	1.25225	AD_spe	1.16197	0.288657	-0.707655
SNRNP200	O75643;A0A494C1A5	O75643;A0A494C1A5	U5 small nuclear ribonucleoprotein 200 kDa helicase	25	25	13.2	13.2	244.5	0	134.94	5248400000	220	1.6441	1.887	ctrl_spe	4.39055	0.00124352	2.61732	AD_spe	1.28302	0.309105	1.03497		4.40001	0.000561404	2.0287	ctrl_spe	3.38645	0.00287912	1.7921	AD_spe	0.826866	0.386096	-0.356065
CKAP4	Q07065	Q07065	Cytoskeleton-associated protein 4	26	26	51.8	51.8	66.022	0	323.31	13563000000	323	1.43205	1.81341	ctrl_spe	3.83271	0.00208333	3.83993	AD_spe	1.55595	0.253889	1.366	up1	7.95182	0	4.43093	ctrl_spe	2.39628	0.0112308	2.02668	AD_spe	3.41019	0.0178	-1.32306	down1
SURF6	O75683	O75683	Surfeit locus protein 6	13	13	24.1	24.1	41.45	0	68.023	6550500000	109	1.501	1.49928	ctrl_spe	4.46523	0.00126984	2.87476	AD_spe	2.83399	0.101905	1.38561	up1	5.8272	0.000328767	1.99759	ctrl_spe	5.07822	0.000297872	2.52894	AD_spe	1.37045	0.221108	0.37969	up0.3
HIST1H2AJ;HIST2H2AC;H2AFJ;HIST1H2AG;HIST2H2AA3;HIST1H2AH;HIST1H2AD;HIST1H2AA	Q99878;Q16777;Q9BTM1;P0C0S8;Q6FI13;Q96KK5;A0A0U1RR32;P20671;A0A0U1RRH7;H0YFX9;Q96QV6;REV__H0Y672;REV__E7EQ67;REV__H7BY63;REV__H0YBA5;REV__A0A087X2A7;REV__Q8NB25	Q99878;Q16777;Q9BTM1;P0C0S8;Q6FI13;Q96KK5;A0A0U1RR32;P20671;A0A0U1RRH7;H0YFX9;Q96QV6	Histone H2A type 1-J;Histone H2A type 2-C;Histone H2A.J;Histone H2A type 1;Histone H2A type 2-A;Histone H2A type 1-H;Histone H2A type 1-D;Histone H2A;Histone H2A type 1-A	9	2	42.2	14.1	13.936	0	119.68	304110000000	237	1.69213	1.43373	ctrl_spe	7.50075	0	2.65738	AD_spe	0.0637596	0.932086	0.0638687		3.80183	0.0012028	4.21713	ctrl_spe	7.04324	0	7.5034	AD_spe	0.215626	0.799489	0.115749
SON	P18583;J3QSZ5	P18583	Protein SON	26	8	13.5	3.9	263.83	0	65.767	3374000000	185	1.57045	1.38642	ctrl_spe	4.22193	0.00149515	2.81094	AD_spe	1.57128	0.250642	0.931824	up0.5	3.10765	0.00264516	1.12062	ctrl_spe	1.55893	0.0415627	1.18414	AD_spe	0.307431	0.703368	0.162799
DKC1	O60832;C9IYT0;H7C0M1;H7BZF2;H7C2Q9;H7C2Q2	O60832;C9IYT0	H/ACA ribonucleoprotein complex subunit 4	12	12	28.8	28.8	57.673	0	107.61	5713100000	136	1.68533	1.34453	ctrl_spe	3.37102	0.00289051	2.79007	AD_spe	1.51791	0.265286	0.90818	up0.5	5.56667	0.000428571	2.2133	ctrl_spe	2.59399	0.00854321	1.66778	AD_spe	0.308827	0.703761	-0.161831
RPS17	H3BNC9;P08708;H0YN88;A0A075B716;H0YN73;A0A0J9YYC4	H3BNC9;P08708;H0YN88;A0A075B716	40S ribosomal protein S17	13	13	17.1	17.1	64.532	0	65.822	81388000000	250	1.34019	1.12907	ctrl_spe	5.0567	0.000805195	1.68178	AD_spe	0.966717	0.412875	0.59312		2.07866	0.0121434	1.6181	ctrl_spe	1.89699	0.0235016	3.66972	AD_spe	0.0664541	0.918773	0.0703176
SSB	P05455;E7ERC4;E9PFL9;E9PGX9	P05455	Lupus La protein	31	31	59.1	59.1	46.836	0	303.15	32243000000	310	4.64084	5.29932	ctrl_spe	6.36236	0.000631579	6.43432	AD_spe	2.13971	0.19075	1.53997	up1	1.14773	0.0888086	2.78667		1.7199	0.0304615	3.42045	AD_spe	0.0349328	0.961989	0.111413
EHMT2	A0A0G2JIS2;Q96KQ7;A2ABF8;A0A0G2JIR1;A2ABF9;A0A0G2JK64;A0A0G2JRR0;A0A0G2JRN8;H0Y4K5	A0A0G2JIS2;Q96KQ7;A2ABF8;A0A0G2JIR1;A2ABF9;A0A0G2JK64;A0A0G2JRR0;A0A0G2JRN8	Histone-lysine N-methyltransferase EHMT2	33	33	27.4	27.4	129.03	0	323.31	17753000000	424	5.74758	4.833	ctrl_spe	6.90891	0	4.48064	AD_spe	0.302895	0.751484	-0.129867		1.05938	0.105134	2.25246		5.84629	0	3.47829	AD_spe	0.966606	0.343845	1.39078
UPF1	Q92900	Q92900	Regulator of nonsense transcripts 1	39	39	36.3	36.3	124.34	0	135.79	8980200000	322	5.59433	4.57973	ctrl_spe	4.40623	0.00125654	4.78643	AD_spe	0.0492859	0.950591	-0.0523535		0.421639	0.443284	0.370006		3.86937	0.00163057	1.70737	AD_spe	1.21268	0.271686	0.530761
THUMPD1	Q9NXG2;H3BNW0	Q9NXG2	THUMP domain-containing protein 1	12	12	31.7	31.7	39.315	0	77.858	4862700000	144	3.14157	4.10053	ctrl_spe	6.65491	0	3.9862	AD_spe	0.35916	0.723716	-0.475876		0.908592	0.142524	1.55602		5.20707	0	2.65051	AD_spe	0.563104	0.516964	0.719202
MRPL28	A2IDC6;Q13084;A2IDC7;Q4TT37	A2IDC6;Q13084;A2IDC7;Q4TT37	39S ribosomal protein L28, mitochondrial	11	11	40	40	28.506	0	26.382	3303900000	152	4.95178	3.68371	ctrl_spe	3.71545	0.002208	3.79178	AD_spe	0.214306	0.825293	-0.129821		0.501818	0.359993	0.852183		1.6043	0.0380653	1.37137	AD_spe	0.151047	0.840523	-0.236315
CTCF	A0A2R8Y595;A0A2R8YFL0;P49711;V9GY73;Q8NI51;A0A2R8Y6Z6;A0A2R8Y6C1;F5H2V8;V9GYX4;V9GZ46	A0A2R8Y595;A0A2R8YFL0;P49711	Transcriptional repressor CTCF	16	16	17.4	17.4	72.999	0	39.276	7313200000	223	2.72844	3.48258	ctrl_spe	6.62075	0	5.2107	AD_spe	1.42912	0.27726	1.27508	up1	0.956057	0.131115	1.29596		3.37531	0.00283243	2.50496	AD_spe	0.606467	0.490693	0.61808
SRSF1	J3KTL2;Q07955;J3KSR8;J3QQV5;J3KSW7	J3KTL2;Q07955	Serine/arginine-rich splicing factor 1	15	15	49.8	49.8	28.329	0	40.765	20551000000	371	5.89271	3.40199	ctrl_spe	4.92569	0.00104242	5.57994	AD_spe	1.44665	0.274355	0.546336	up0.5	7.29464	0	0.889574		2.94728	0.00579439	1.72693	AD_spe	0.827926	0.386487	-0.132526
CMSS1	Q9BQ75;C9J384;H7C515	Q9BQ75;C9J384	Protein CMSS1	12	12	35.8	35.8	31.884	0	25.918	8894000000	114	5.46422	3.01229	ctrl_spe	3.79573	0.00218033	3.44204	AD_spe	1.22089	0.330593	0.490616		0.125212	0.810498	0.468154		3.59159	0.00229885	2.73197	AD_spe	1.71207	0.146118	2.68379	up1
FXR2	P51116;I3L1Z2	P51116	Fragile X mental retardation syndrome-related protein 2	19	17	40.6	38.6	74.222	0	229.74	5574100000	137	1.74983	2.9144	ctrl_spe	4.65349	0.00121839	2.95669	AD_spe	0.240928	0.802401	0.412252		0.0600974	0.907447	0.119605		2.7106	0.00749153	2.03447	AD_spe	1.6348	0.161781	1.3066	up1
DHX57	Q6P158;H7C109;A0A087WZ11;A0A087WW12	Q6P158;H7C109	Putative ATP-dependent RNA helicase DHX57	25	23	20.5	19.8	155.6	0	323.31	4694500000	182	1.94759	2.63587	ctrl_spe	2.76387	0.00529154	3.65708	AD_spe	1.0848	0.369072	1.20309		0.139902	0.790116	0.335425		3.83598	0.001775	1.72549	AD_spe	0.676345	0.451305	0.850106
ERH	P84090;G3V279	P84090;G3V279	Enhancer of rudimentary homolog	8	8	46.2	46.2	12.259	0	108.89	23798000000	229	2.11262	2.54986	ctrl_spe	6.29728	0.000592593	3.02316	AD_spe	0.501665	0.639762	0.542744		1.99538	0.0143385	0.791359		2.05667	0.0177808	2.18009	AD_spe	0.824744	0.386637	0.417073
GNL3	Q9BVP2;C9JYH9;C9JZT7;B4DMU5	Q9BVP2	Guanine nucleotide-binding protein-like 3	14	14	29	29	61.992	0	146.69	5335100000	140	1.91954	2.34822	ctrl_spe	5.11316	0.000693333	2.35309	AD_spe	0.722754	0.523804	0.665641		0.975375	0.126073	1.35819		4.62797	0.000239316	2.21429	AD_spe	1.6788	0.149143	1.38079	up1
MRPL48	Q96GC5;F5H702;F5H8D0	Q96GC5;F5H702;F5H8D0	39S ribosomal protein L48, mitochondrial	6	6	27.8	27.8	23.934	0	32.606	4035600000	119	3.80832	2.19422	ctrl_spe	3.11812	0.00371134	2.6534	AD_spe	0.185676	0.851215	0.142219		0.564119	0.299091	0.896806		1.75752	0.0290966	1.17397	AD_spe	0.0543679	0.934571	0.0843035
KRR1	Q13601	Q13601	KRR1 small subunit processome component homolog	13	13	29.7	29.7	43.664	0	33.192	5235800000	127	2.41736	2.08137	ctrl_spe	5.63862	0.00087395	3.51932	AD_spe	0.996624	0.403014	0.682316		0.284032	0.586414	0.60073		2.92852	0.00574074	2.45779	AD_spe	1.28028	0.252249	1.36206
SRP14	P37108;H0YLA2;H0YLW0	P37108;H0YLA2	Signal recognition particle 14 kDa protein	11	11	51.5	51.5	14.57	0	95.525	6976700000	132	1.59036	2.01353	ctrl_spe	4.23098	0.0015098	3.29167	AD_spe	0.235345	0.807554	0.313498		0.916194	0.140579	1.69793		4.65415	0.000243478	3.35476	AD_spe	1.26575	0.253385	1.50322
H2AFV;H2AFZ	Q71UI9;P0C0S5;C9J0D1;A0A494C189;C9J386	Q71UI9;P0C0S5;C9J0D1;A0A494C189;C9J386	Histone H2A.V;Histone H2A.Z;Histone H2A	2	2	18.8	18.8	13.509	0	13.925	8740800000	75	1.63046	1.37948	ctrl_spe	1.53828	0.0255814	2.50767	AD_spe	0.768046	0.512947	-0.823296		0.534927	0.328015	1.39601		3.65188	0.002	2.27688	AD_spe	0.500515	0.5483	0.914024
SRSF2	Q01130;J3KP15;J3QL05;Q9BRL6	Q01130;J3KP15;J3QL05	Serine/arginine-rich splicing factor 2	16	16	49.8	49.8	25.476	0	79.467	19672000000	176	6.42626	4.87117	ctrl_spe	7.72834	0	7.49004	AD_spe	5.25908	0.006	0.97262	up0.5	0.0263477	0.953031	-0.138554		2.4044	0.0111969	3.11297	AD_spe	1.16482	0.28854	2.63793
RPL36AL	Q969Q0	Q969Q0	60S ribosomal protein L36a-like	2	2	9.4	9.4	12.469	0	3.3008	8760900000	52	1.42224	2.95571	ctrl_spe	5.84167	0.00071028	4.34644	AD_spe	1.10584	0.360656	1.6389		0.0107951	0.978519	0.0366294		4.84035	0.000266667	3.0179	AD_spe	2.61054	0.05	3.01784	up1
MEPCE	Q7L2J0	Q7L2J0	7SK snRNA methylphosphate capping enzyme	13	13	21.6	21.6	74.354	0	54.016	3871000000	120	1.35015	1.27141	ctrl_spe	5.5113	0.000818898	2.01777	AD_spe	0.815153	0.483763	0.588766		0.702518	0.215052	0.509764		4.63429	0.000241379	1.6345	AD_spe	0.726411	0.424393	0.340059
KIF2A	O00139;D6R9M0;H0Y8H2;A0A669KBE9;H0Y5Z9	O00139	Kinesin-like protein KIF2A	18	17	26.5	25.2	79.954	0	66.736	4531700000	146	2.40843	0.9845		2.78505	0.00513924	1.93057	AD_spe	1.88094	0.222061	0.740594	up0.5	2.11157	0.0116466	1.44388	ctrl_spe	2.66837	0.00789916	1.9166	AD_spe	0.123253	0.864921	-0.110179
PES1	B5MCF9;O00541;B3KXD6;H7C267	B5MCF9;O00541;B3KXD6	Pescadillo homolog	14	14	20.8	20.8	66.077	0	26.662	4178900000	118	1.28035	1.0831		1.8499	0.0134378	1.93898	AD_spe	0.609024	0.570919	0.565359		3.12475	0.00265217	1.35729	ctrl_spe	3.69796	0.00184615	1.6132	AD_spe	0.0432042	0.948313	-0.0238259
HIST1H2BM	Q99879	Q99879	Histone H2B type 1-M	14	1	83.3	8.7	13.989	0	96.118	757810000000	498	1.27472	0.740634		5.36154	0.000764706	1.78267	AD_spe	0.553887	0.610138	0.264681		4.97285	0.000509804	5.42991	ctrl_spe	7.2673	0	4.09816	AD_spe	0.447387	0.58253	-0.150472
TOP2B	Q02880;E9PCY5;J3KTB7	Q02880;E9PCY5	DNA topoisomerase 2-beta;DNA topoisomerase 2	45	34	27.7	21.7	183.26	0	136.45	9557700000	358	1.25745	2.3913		3.72641	0.00221687	3.46192	AD_spe	0.88656	0.453355	1.28283		9.62851	0	2.56427	ctrl_spe	6.034	0	2.94512	AD_spe	0.775132	0.40013	-0.113744
RPL36	Q9Y3U8;J3QSB5;J3KTD3	Q9Y3U8;J3QSB5	60S ribosomal protein L36	6	6	34.3	34.3	12.254	0	24.251	25601000000	107	1.24197	2.81562		1.39868	0.0337316	3.17243	AD_spe	0.114323	0.891332	0.337844		5.3961	0.000521739	3.36603	ctrl_spe	5.05455	0.000294737	4.48021	AD_spe	2.08721	0.0870361	0.790754	up0.5
CHD4	Q14839;A0A2R8Y425;A0A0C4DGG9;A0A2R8Y521;A0A2R8Y212;F5GWX5;A0A2R8YFD8;A0A2U3TZM0;A0A2R8YFK9;A0A2R8YD40;A0A2R8YDJ9;A0A2R8Y5J0;A0A2R8Y4X2;A0A2R8YDW2;A0A2R8Y8C1;A0A2R8YER1;A0A2R8Y445;A0A2R8Y5Z7;A0A2R8Y685;A0A2R8Y8B3;A0A2R8Y7I0;A0A2R8Y7M9;A0A2R8Y5M9;A0A2R8YE38;A0A2R8Y795	Q14839;A0A2R8Y425;A0A0C4DGG9;A0A2R8Y521;A0A2R8Y212;F5GWX5;A0A2R8YFD8;A0A2U3TZM0;A0A2R8YFK9;A0A2R8YD40;A0A2R8YDJ9;A0A2R8Y5J0;A0A2R8Y4X2;A0A2R8YDW2;A0A2R8Y8C1;A0A2R8YER1;A0A2R8Y445;A0A2R8Y5Z7;A0A2R8Y685	Chromodomain-helicase-DNA-binding protein 4	27	22	16.4	14.2	218	0	110.12	4977600000	190	1.13022	1.36247		2.31581	0.00843931	1.56779	AD_spe	0.993332	0.403648	0.853851		2.66338	0.00508057	1.24932	ctrl_spe	1.6476	0.0347066	1.20442	AD_spe	0.42357	0.596122	0.220671
RPL21	P46778;M0R181;G3V1B3;M0R3I5	P46778;M0R181;G3V1B3	60S ribosomal protein L21	15	15	55	55	18.565	0	93.154	69573000000	239	1.10313	3.45053		6.50608	0	4.24744	AD_spe	0.309303	0.749879	0.867514		3.19462	0.00250279	3.86958	ctrl_spe	4.66109	0.000245614	4.87019	AD_spe	0.896738	0.366312	0.934535
CHD3	Q12873;A0A5F9ZHX5;H7C2H0;H7C3H7;A0A5F9ZHM2	Q12873;A0A5F9ZHX5	Chromodomain-helicase-DNA-binding protein 3	49	31	26.9	16.6	226.59	0	233.59	8042000000	287	1.00197	2.32895		4.26269	0.00137931	4.47156	AD_spe	1.68377	0.242682	2.43501	up1	1.94634	0.0150701	1.84451	ctrl_spe	1.90998	0.0231023	1.67977	AD_spe	0.243661	0.774018	-0.23883
HNRNPM	A0A087X0X3;P52272;M0R2T0;M0R0N3;M0QYQ7;M0R2I7;M0R0Y6;M0QY96;M0QYL3	A0A087X0X3;P52272	Heterogeneous nuclear ribonucleoprotein M	52	4	63.8	7.7	77.569	0	323.31	85391000000	825	0.981021	0.53709		4.28009	0.00138614	1.41335	AD_spe	1.09312	0.367665	0.426371		5.82851	0.000333333	1.59379	ctrl_spe	3.82822	0.00176398	1.08208	AD_spe	2.19277	0.0847761	0.399239	up0.3
RPS15A	P62244;I3L3P7;I3L246;H3BN98;H3BV27;H3BT37;I3L303;H3BVC7	P62244;I3L3P7;I3L246;H3BN98	40S ribosomal protein S15a	13	13	81.5	81.5	14.839	0	88.195	54799000000	178	0.979189	2.12076		5.03787	0.000917197	5.34198	AD_spe	0.130864	0.882629	0.257938		3.79627	0.00119444	4.493	ctrl_spe	6.06198	0	4.76464	AD_spe	0.0457441	0.945644	0.0681799
RPL32	D3YTB1;F8W727;P62910;D3YTI8	D3YTB1;F8W727;P62910	60S ribosomal protein L32	12	12	48.9	48.9	15.616	0	114.04	105830000000	254	0.961905	3.34379		7.3945	0	5.3803	AD_spe	1.16693	0.338463	2.59461		4.34771	0.000551724	4.99551	ctrl_spe	4.56616	0.000451613	5.72381	AD_spe	0.939879	0.348848	0.833571
RPL8	P62917;E9PKZ0;G3V1A1;E9PKU4;E9PP36	P62917;E9PKZ0;G3V1A1;E9PKU4;E9PP36	60S ribosomal protein L8	17	17	39.7	39.7	28.024	0	323.31	160120000000	349	0.945636	2.03276		6.20498	0.000539326	6.0217	AD_spe	0.511954	0.640193	0.881808		6.23846	0.00025	3.60518	ctrl_spe	4.58832	0.000455285	4.13625	AD_spe	3.56331	0.0168	1.08495	up1
EBNA1BP2	H7C2Q8;Q99848	H7C2Q8;Q99848	Probable rRNA-processing protein EBP2	17	17	42.7	42.7	40.684	0	102.73	12343000000	160	0.940477	1.87066		1.98399	0.0118895	1.66501	AD_spe	0.0564996	0.940683	0.12184		4.92866	0.0005	3.04297	ctrl_spe	4.961	0.000282828	3.81283	AD_spe	0.514109	0.542577	0.253682
RRS1	Q15050	Q15050	Ribosome biogenesis regulatory protein homolog	20	20	44.4	44.4	41.193	0	70.898	9229300000	212	0.900045	1.2211		5.56663	0.000832	1.92029	AD_spe	0.67852	0.532628	0.675098		8.08583	0	2.67273	ctrl_spe	3.91132	0.00166234	2.5043	AD_spe	0.166946	0.824595	-0.0443378
NAT10	Q9H0A0;A0A087WV29;E9PMU0;E9PJN6	Q9H0A0;A0A087WV29	N-acetyltransferase 10	25	25	24.6	24.6	115.73	0	171	8132800000	177	0.882318	1.53062		3.46103	0.00270149	2.46377	AD_spe	0.786639	0.503004	0.940107		2.83259	0.0039803	2.26454	ctrl_spe	4.53232	0.000444444	2.45216	AD_spe	0.862986	0.374121	0.581299
CAPRIN1	Q14444;E9PLA9;G3V153	Q14444;E9PLA9;G3V153	Caprin-1	11	11	20.9	20.9	78.365	0	301.87	12075000000	134	0.838027	-0.449633		6.23614	0.00055814	3.59446	AD_spe	3.27769	0.0625455	1.02404	up1	3.23964	0.00246857	2.64208	ctrl_spe	3.12925	0.00416	2.25199	AD_spe	0.214667	0.798437	-0.223328
RPL18	J3QQ67;Q07020;G3V203;H0YHA7;F8VYV2;A0A075B7A0;F8VUA6;F8VXR6	J3QQ67;Q07020;G3V203;H0YHA7;F8VYV2;A0A075B7A0;F8VUA6	60S ribosomal protein L18	13	13	51.6	51.6	21.728	0	146.64	192870000000	352	0.819656	1.9542		5.67912	0.000888889	5.39584	AD_spe	0.38108	0.706829	0.750763		4.87047	0.000495238	3.02039	ctrl_spe	6.21639	0	3.0154	AD_spe	1.00668	0.329886	0.494339
RPL35A	P18077;C9K025;F8WBS5;F8WB72	P18077;C9K025;F8WBS5;F8WB72	60S ribosomal protein L35a	16	16	55.5	55.5	12.538	0	71.344	55699000000	210	0.766445	2.75326		4.97635	0.00105521	4.10105	AD_spe	0.719331	0.523961	1.79398		6.95325	8.69565e-05	5.11485	ctrl_spe	9.09786	0	5.68246	AD_spe	0.897644	0.366833	0.418769
RPL13A;RPL13a	P40429;M0QYS1;Q8J015;Q6NVV1;M0QZU1;A0A096LPE0	P40429;M0QYS1;Q8J015	60S ribosomal protein L13a	20	20	51.7	51.7	23.577	0	59.208	123860000000	353	0.701877	2.55851		5.57835	0.00083871	4.52064	AD_spe	0.70045	0.528503	1.74609		5.46945	0.0005	5.34529	ctrl_spe	5.20091	0	5.40271	AD_spe	2.18162	0.0848116	1.2945	up1
CDC5L	Q99459	Q99459	Cell division cycle 5-like protein	33	33	45.5	45.5	92.25	0	128.73	7855000000	232	0.690585	1.46819		4.57723	0.00117127	2.60899	AD_spe	0.499222	0.63998	0.786552		6.31825	0.000133333	2.30939	ctrl_spe	4.28388	0.000927536	2.45951	AD_spe	1.99348	0.0979565	0.458296	up0.3
HIST1H4A	P62805	P62805	Histone H4	17	17	68.9	68.9	11.367	0	79.766	257280000000	486	0.679786	0.792757		2.73616	0.00538272	1.32193	AD_spe	0.161774	0.863303	-0.178047		5.42868	0.000483516	3.56302	ctrl_spe	2.5963	0.00846281	1.78484	AD_spe	1.14329	0.292232	-0.651633
RPL12	P30050	P30050	60S ribosomal protein L12	8	8	64.8	64.8	17.818	0	80.036	41426000000	102	0.675298	2.27006		3.78251	0.0022439	3.95976	AD_spe	0.476387	0.637012	1.18244		1.59921	0.0323867	4.04739	ctrl_spe	5.36327	0	4.67491	AD_spe	0.187533	0.808571	0.496577
NCL	P19338;H7BY16;C9JYW2;C9JLB1;C9J1H7;C9JWL1	P19338;H7BY16	Nucleolin	52	52	46.6	46.6	76.613	0	323.31	200500000000	688	0.656166	3.02707		6.4472	0	5.1426	AD_spe	0.542561	0.616554	1.76538		1.83045	0.0189571	5.52687	ctrl_spe	4.34543	0.000948148	6.87894	AD_spe	0.465318	0.566951	1.34854
PSIP1	O75475;V9GYT7;M0R0J3	O75475	PC4 and SFRS1-interacting protein	20	19	34.9	33	60.103	0	96.275	9867500000	186	0.629177	1.43118		1.98947	0.0118449	2.0072	AD_spe	0.0558886	0.939387	0.126781		1.95532	0.0148848	2.22998	ctrl_spe	4.13978	0.00103497	3.43892	AD_spe	0.837391	0.384508	0.782516
HNRNPA1;HNRNPA1L2	P09651;F8W6I7;F8VZ49;Q32P51;F8VTQ5;F8W646;F8VYN5	P09651;F8W6I7;F8VZ49;Q32P51;F8VTQ5	Heterogeneous nuclear ribonucleoprotein A1;Heterogeneous nuclear ribonucleoprotein A1, N-terminally processed;Heterogeneous nuclear ribonucleoprotein A1-like 2	37	12	73.4	27.7	38.746	0	323.31	229860000000	388	0.543382	1.96032		4.22878	0.00150244	4.37244	AD_spe	0.397234	0.691965	1.0462		3.6705	0.00144	3.04195	ctrl_spe	5.91697	0	3.30981	AD_spe	0.211353	0.801297	0.198851
RPL14	P50914;E7EPB3	P50914;E7EPB3	60S ribosomal protein L14	15	15	51.6	51.6	23.432	0	43.915	66047000000	232	0.530097	2.22331		6.34397	0.000623377	4.46028	AD_spe	0.805899	0.488645	2.09642		7.56739	0	5.14447	ctrl_spe	3.3039	0.00312042	3.71634	AD_spe	0.294624	0.712923	0.166645
RPL13	P26373;J3QSB4;J3KS98;H3BTH3;H3BUK8	P26373;J3QSB4	60S ribosomal protein L13	24	24	59.7	59.7	24.261	0	162.51	200910000000	557	0.525561	1.60085		7.4802	0	5.8185	AD_spe	0.538732	0.616487	1.12206		3.40922	0.00204762	3.31282	ctrl_spe	6.06998	0	3.2629	AD_spe	1.3351	0.229434	0.95105	up0.5
HIST2H3A;HIST3H3;HIST1H3A	Q71DI3;Q16695;P68431	Q71DI3;Q16695;P68431	Histone H3.2;Histone H3.1t;Histone H3.1	11	0	38.2	0	15.388	0	20.898	144880000000	153	0.491503	0.394316		3.04652	0.00389226	1.45325	AD_spe	0.619671	0.569352	-0.341484		5.55552	0.000423529	5.32941	ctrl_spe	2.46463	0.0102969	1.35536	AD_spe	3.10315	0.0248	-1.03652	down1
PRPF19	Q9UMS4;F5GY56;H0YGF3;F5H2I0;H0YGZ5	Q9UMS4;F5GY56	Pre-mRNA-processing factor 19	12	12	28.8	28.8	55.18	0	29.346	6055900000	102	0.427008	0.630027		6.43584	0	2.37154	AD_spe	1.51604	0.263752	1.11843	up1	3.52884	0.001725	2.06184	ctrl_spe	5.09935	0.000301075	2.5868	AD_spe	2.2259	0.0811077	0.58836	up0.5
RPL30	P62888;E5RI99;A0A0C4DH44;E5RJH3;A0A0B4J213	P62888;E5RI99;A0A0C4DH44	60S ribosomal protein L30	9	9	74.8	74.8	12.784	0	42.791	36245000000	136	0.420434	1.60663		3.69018	0.00230159	3.70493	AD_spe	0.436973	0.669664	1.14922		5.64278	0.000433735	4.44189	ctrl_spe	4.59615	0.000459016	4.35489	AD_spe	0.056946	0.931807	-0.0540542
RPL18A	M0R117;Q02543;M0R1A7;M0R3D6;M0R0P7	M0R117;Q02543;M0R1A7;M0R3D6;M0R0P7	60S ribosomal protein L18a	19	19	76.6	76.6	18.079	0	55.442	81304000000	228	0.416158	1.71125		5.61816	0.000866667	5.76146	AD_spe	0.692531	0.531168	1.70926		4.27546	0.000633333	5.38957	ctrl_spe	6.76608	0	5.21781	AD_spe	0.459721	0.571444	0.54808
GTPBP4	Q9BZE4;Q5T3R7	Q9BZE4	Nucleolar GTP-binding protein 1	25	25	38.5	38.5	73.964	0	70.001	18935000000	271	0.331984	0.822741		3.89312	0.00190717	2.85011	AD_spe	0.887545	0.456165	1.22511		5.68335	0.000455696	3.35322	ctrl_spe	6.41822	0	4.20341	AD_spe	0.727571	0.425864	0.235155
SMARCA4	P51532;Q9HBD4;A0A2R8Y4P4;A0A2R8Y7S2;A0A0A0MT49;A0A2R8YGG3;A0A2R8Y440;A0A2R8YG32;A0A2R8Y7F3;A0A2R8Y4C5;A0A2R8Y6N0;A0A2R8YF58;A0A2R8Y6V2;A0A2R8YF80;A0A2R8Y526;A0A2R8Y7Y7;A0A2R8YGP5;A0A2R8YDA1;A0A2R8Y523;A0A2R8Y5K3;A0A2R8YCY3;A0A2R8YFV8;K7EQF0;A0A2R8YFK5;A0A2R8Y4R6;K7EP28;A0A0U1RQW7;B1ALF6;A0A0U1RRD6;A0A0U1RRF8;A0A0A0MSS5;F6UH26;A0A0U1RQU0;A0A0U1RR09;F6XE55;A0A0U1RRN2;B1ALG1;A0A0U1RR83;A0A0U1RQX3;F6…	P51532;Q9HBD4;A0A2R8Y4P4;A0A2R8Y7S2;A0A0A0MT49;A0A2R8YGG3;A0A2R8Y440;A0A2R8YG32;A0A2R8Y7F3;A0A2R8Y4C5;A0A2R8Y6N0;A0A2R8YF58;A0A2R8Y6V2;A0A2R8YF80;A0A2R8Y526;A0A2R8Y7Y7;A0A2R8YGP5;A0A2R8YDA1;A0A2R8Y523	Transcription activator BRG1	25	15	18	11.5	184.64	0	74.626	7061700000	181	0.303449	0.590206		6.20622	0.000545455	3.34618	AD_spe	1.29679	0.306765	1.24051	up1	7.52249	0	2.55142	ctrl_spe	2.92215	0.00571429	1.92591	AD_spe	0.312925	0.70015	-0.141867
SMARCA5	O60264;A0A0A0MRP6;B7ZLQ5;P28370	O60264	SWI/SNF-related matrix-associated actin-dependent regulator of chromatin subfamily A member 5	37	37	37.8	37.8	121.9	0	323.31	16064000000	321	0.217046	0.53177		2.90397	0.00464262	2.46216	AD_spe	1.34153	0.296794	1.5615	up1	5.55281	0.000418605	4.00186	ctrl_spe	5.56692	0	3.26017	AD_spe	0.0387385	0.954806	-0.0326437
RPL11	P62913;Q5VVC8	P62913;Q5VVC8	60S ribosomal protein L11	10	10	39.9	39.9	20.252	0	63.814	81464000000	208	0.365358	0.760898		5.50033	0.000806202	1.46623	AD_spe	0.133076	0.880252	0.220863		1.58358	0.0333642	1.48534	ctrl_spe	4.15039	0.00104225	2.11096	AD_spe	0.624177	0.477139	0.514667
RPL28	P46779;H0YKD8;H0YMF4;H0YLP6	P46779;H0YKD8;H0YMF4;H0YLP6	60S ribosomal protein L28	16	16	63.5	63.5	15.747	0	206.36	60475000000	227	0.234262	0.916151		6.89969	0	4.71792	AD_spe	0.642779	0.560882	1.41669		3.05517	0.0028125	2.46354	ctrl_spe	2.25495	0.0137122	1.94353	AD_spe	0.0818903	0.902139	0.0999711
CMAS	Q8NFW8;F5GYM0;F5H296	Q8NFW8	N-acylneuraminate cytidylyltransferase	14	14	32.5	32.5	48.379	0	79.907	5060200000	118	1.15513	1.56926		5.03383	0.00108861	3.57872	AD_spe	0.844045	0.471135	0.848463		0.596188	0.275298	0.643254		3.41229	0.00291111	2.02008	AD_spe	2.33448	0.0717241	1.23357	up1
FXR1	B4DXZ6;P51114;E7EU85;E9PFF5;C9JZE0;C9JY20;C9JAJ4;C9IZ22;H7C4S4;C9J5B4	B4DXZ6;P51114;E7EU85;E9PFF5	Fragile X mental retardation syndrome-related protein 1	15	15	30.3	30.3	68.326	0	66.849	4797400000	134	1.11774	1.96014		5.0749	0.000684211	3.19065	AD_spe	1.23973	0.321775	1.43908		0.37723	0.48517	0.489422		2.77799	0.00678947	1.8237	AD_spe	2.27982	0.0763279	1.48515	up1
SRSF3	P84103;A0A087X2D0	P84103;A0A087X2D0	Serine/arginine-rich splicing factor 3	11	10	44.5	44.5	19.329	0	75.397	57116000000	197	7.32573	0.894645		1.7972	0.0144787	1.34679	AD_spe	0.677148	0.532627	0.308961		1.70784	0.0245793	0.760917		2.72464	0.00755556	1.137	AD_spe	0.847471	0.379303	-0.346126
ZFP62	Q8NB50;D6RBG3;D6RCF6;D6R9C0	Q8NB50	Zinc finger protein 62 homolog	16	15	20	19	102.51	0	28.842	2651200000	90	1.19423	1.86082		1.39461	0.0338841	2.42785	AD_spe	0.331597	0.733341	0.603283		0.573017	0.291618	-1.23284		2.39063	0.011249	1.20016	AD_spe	1.69214	0.146742	1.94307	up1
NOP16	Q9Y3C1;D6RIC3;A0A0C4DGU5;A0A087X2G6;D6RC60;A0A087WU10	Q9Y3C1;D6RIC3;A0A0C4DGU5;A0A087X2G6	Nucleolar protein 16	10	10	48.9	48.9	21.188	0	48.386	4100600000	99	0.933828	1.46626		3.52826	0.00263636	2.65682	AD_spe	0.662589	0.546934	0.758004		0.156791	0.763589	0.31238		2.59073	0.0085082	1.47637	AD_spe	0.747074	0.41184	0.778629
RSBN1	A0A087WWP8;Q5VWQ0;A0A0C4DGT8;A0A0C4DH79	A0A087WWP8;Q5VWQ0;A0A0C4DGT8;A0A0C4DH79	Round spermatid basic protein 1	21	20	29.7	28.8	84.975	0	118.54	2812300000	100	0.881756	1.24016		3.00259	0.00396013	2.10049	AD_spe	1.58016	0.248838	1.34882	up1	0.623811	0.257461	0.514387		2.31746	0.0121955	1.34729	AD_spe	2.78612	0.0354286	1.1771	up1
POP1	Q99575;E5RK39	Q99575	Ribonucleases P/MRP protein subunit POP1	19	19	23.9	23.9	114.71	0	46.186	4177000000	125	0.758548	1.07366		2.24262	0.00888	2.20314	AD_spe	0.737805	0.518849	0.825606		0.51299	0.347879	0.486029		3.85388	0.00161006	1.49125	AD_spe	0.907876	0.362993	0.49548
C7orf50	C9JQV0;Q9BRJ6;H7C0T1;H7C2R9	C9JQV0;Q9BRJ6	Uncharacterized protein C7orf50	9	9	42.2	42.2	21.883	0	90.281	5109200000	87	0.462614	0.738243		4.11999	0.00183178	1.74205	AD_spe	1.47012	0.278085	1.20232	up1	0.704106	0.214658	1.25416		2.84706	0.00618018	1.80698	AD_spe	0.559041	0.516671	0.744324
U2AF2	P26368;K7ELP8;K7ENG2	P26368	Splicing factor U2AF 65 kDa subunit	7	7	11.6	11.6	53.5	0	14.845	8427400000	103	0.462221	-1.1272		1.75594	0.015565	3.87901	AD_spe	0.634427	0.564849	1.29593		0.99886	0.119229	1.09326		2.41555	0.0110233	2.31833	AD_spe	0.179482	0.81101	0.136832
RPS19	P39019;A0A075B6E2;M0R2L9;M0QYF7;M0R140	P39019;A0A075B6E2	40S ribosomal protein S19	20	20	79.3	79.3	16.06	0	114.14	150630000000	408	0.424155	1.21043		2.38294	0.00803499	1.44337	AD_spe	0.511058	0.638101	0.970273		0.430614	0.435092	1.10952		4.60427	0.000466667	3.92424	AD_spe	0.181348	0.811389	0.379794
DDX54	Q8TDD1;H0YHH7;F8VRX4	Q8TDD1	ATP-dependent RNA helicase DDX54	21	21	26.1	26.1	98.594	0	123.14	4935200000	131	0.396244	0.690945		5.69814	0.000904348	2.07902	AD_spe	0.409337	0.687419	0.485344		0.506513	0.354777	1.15276		1.87738	0.0241948	1.32173	AD_spe	0.0134811	0.982206	0.0300358
DDX18	Q9NVP1;H7C452	Q9NVP1	ATP-dependent RNA helicase DDX18	18	18	31.3	31.3	75.406	0	230.26	6633000000	126	0.388225	0.835529		6.24007	0.000564706	2.68684	AD_spe	1.04269	0.383784	1.17956		0.367018	0.495903	0.832609		1.65755	0.0336867	1.67538	AD_spe	0.95961	0.346108	1.30852
NPM1	P06748;E5RI98;E5RGW4	P06748	Nucleophosmin	26	26	66.3	66.3	32.575	0	323.31	105480000000	335	0.301359	1.24762		2.25904	0.00872206	3.24631	AD_spe	0.192927	0.845425	0.602313		0.788726	0.180378	3.08654		6.29781	0	5.38777	AD_spe	1.08118	0.307964	2.6528
RPF2	Q9H7B2;Q5VXN0;U3KQN5;Q5VXM9	Q9H7B2;Q5VXN0	Ribosome production factor 2 homolog	9	9	28.1	28.1	35.582	0	26.767	5953500000	90	0.224161	-0.478093		2.73889	0.00534579	2.68965	AD_spe	1.6371	0.246021	1.54249	up1	0.71416	0.209291	1.54652		2.80248	0.00646696	2.3583	AD_spe	0.437908	0.588331	0.746433
RPS15	K7EQJ5;P62841;K7EM56;A0A0B4J2B4;K7EJ78;S4R417;K7ELC2;S4R456	K7EQJ5;P62841;K7EM56;A0A0B4J2B4;K7EJ78;S4R417;K7ELC2;S4R456	40S ribosomal protein S15	8	8	45.4	45.4	16.57	0	30.887	40782000000	157	1.5951	3.64077	ctrl_spe	0.622068	0.40265	1.51697		0.75631	0.513352	1.38865		6.45431	0.000142857	4.9807	ctrl_spe	6.30431	0	4.90794	AD_spe	0.83675	0.382485	0.475587
CCDC86	Q9H6F5;H0YG79	Q9H6F5	Coiled-coil domain-containing protein 86	11	11	31.7	31.7	40.235	0	37.496	4752000000	86	2.39759	1.79375	ctrl_spe	0.869727	0.163804	1.15594		0.635856	0.564641	-0.615118		2.60517	0.00569014	1.22814	ctrl_spe	3.85612	0.00162025	2.05391	AD_spe	0.0290176	0.96544	0.0175836
SART1	O43290;E9PQI8	O43290	U4/U6.U5 tri-snRNP-associated protein 1	19	19	31.5	31.5	90.254	0	243.26	6041500000	159	1.64305	1.52612	ctrl_spe	NaN	1	0		1.91597	0.218095	-1.31046	down1	3.35596	0.00217544	2.30593	ctrl_spe	5.25499	0	2.19304	AD_spe	1.33765	0.229302	0.684158	up0.5
ALYREF	Q86V81	Q86V81	THO complex subunit 4	15	2	49.8	6.2	26.888	0	323.31	99698000000	313	3.15077	2.39564	ctrl_spe	4.65939	0.00122543	0.753767		0.624918	0.567759	0.429097		0.451162	0.415269	1.34002		3.34313	0.00295745	4.35908	AD_spe	0.794031	0.398905	1.42326
HNRNPH1	P31943;G8JLB6;E9PCY7;D6RBM0;H0YB39;E7EN40;H0YBD7;D6RIU0;E7EQJ0;D6RIH9;D6RJ04;D6RAM1;D6RDU3;D6RIT2;D6RFM3;D6R9T0;D6RDL0;H0YBG7;D6RF17;D6R9D3;E5RGH4;H0YAQ2;E5RJ94	P31943;G8JLB6;E9PCY7;D6RBM0;H0YB39;E7EN40;H0YBD7	Heterogeneous nuclear ribonucleoprotein H;Heterogeneous nuclear ribonucleoprotein H, N-terminally processed	17	4	45.9	16.7	49.229	0	262.99	39695000000	356	5.54235	1.69038	ctrl_spe	4.21394	0.00162319	0.985336		2.95931	0.1056	-0.565811	down0.5	2.36193	0.00824561	0.802331		2.7674	0.00706494	1.41638	AD_spe	0.537175	0.532902	-0.168745
DDX56	Q9NY93;G3V0G3;F8WDT8;H7C3E9;F8WEI3;H7BZN7	Q9NY93;G3V0G3;F8WDT8;H7C3E9	Probable ATP-dependent RNA helicase DDX56	11	11	21.8	21.8	61.589	0	45.563	2077300000	70	1.52575	1.29295	ctrl_spe	NaN	1	0		1.64213	0.246511	-0.908597	down0.5	0.438019	0.427045	-0.653638		4.80741	0.000261682	1.06761	AD_spe	1.57742	0.172029	1.19015	up1
RPS25	P62851;E9PQK3;E9PK60	P62851	40S ribosomal protein S25	12	12	53.6	53.6	13.742	0	87.707	142560000000	236	0.814731	0.76242		3.17634	0.00353846	0.684136		0.659234	0.547667	0.43979		1.6853	0.0262329	1.96564	ctrl_spe	2.1913	0.0154513	3.70344	AD_spe	0.432069	0.592148	0.461093
SRSF6	Q13247;A0A590UJK4;A0A590UK01;A0A590UJP7;A0A590UK80	Q13247;A0A590UJK4;A0A590UK01;A0A590UJP7;A0A590UK80	Serine/arginine-rich splicing factor 6	5	5	15.7	15.7	39.586	0	34.143	6525800000	93	0.770261	1.05196		0.726866	0.308367	1.32295		0.264566	0.782822	0.419774		3.83227	0.00123741	1.92867	ctrl_spe	2.88781	0.00604566	1.24076	AD_spe	0.431492	0.590389	-0.162523
MTDH	Q86UE4;E5RJU9;H0YB56;H0YBJ8;H0YBE0	Q86UE4;E5RJU9	Protein LYRIC	24	24	43.6	43.6	63.836	0	157.66	11722000000	170	0.672717	1.69403		1.01424	0.0931841	1.87899		0.161677	0.862148	-0.413204		6.95843	8.88889e-05	3.1993	ctrl_spe	5.50487	0	3.15785	AD_spe	0.927867	0.356413	0.312063
RPL34	P49207	P49207	60S ribosomal protein L34	10	10	42.7	42.7	13.293	0	21.395	65626000000	117	0.630012	2.64601		0.929401	0.128851	3.9186		0.0888345	0.906675	0.448976		1.54528	0.0359612	4.02989	ctrl_spe	5.04338	0.000291667	2.54057	AD_spe	0.55912	0.517773	1.24939
NOP2	P46087;F5GWB7;F5H709;F5H5X6;F5H359;F5GYR3;F5H8G6	P46087	Probable 28S rRNA (cytosine(4447)-C(5))-methyltransferase	24	24	33.9	33.9	89.301	0	150.56	15953000000	229	0.532562	1.16316		0.621182	0.402281	0.686877		0.35013	0.728784	-0.60887		2.15196	0.0112397	2.64321	ctrl_spe	6.79158	0	3.58734	AD_spe	0.672533	0.452766	0.716352
FTSJ3	Q8IY81	Q8IY81	pre-rRNA processing protein FTSJ3	18	18	21.8	21.8	96.557	0	91.951	8007900000	120	0.48	0.922535		0.905548	0.141145	0.724158		0.021962	0.981736	0.0415572		4.5717	0.000495575	2.34401	ctrl_spe	3.82212	0.00175309	2.83666	AD_spe	0.0807012	0.900722	0.0551962
DDX27	B7Z6D5;Q96GQ7;A0A087X059;A0A087WYH5	B7Z6D5;Q96GQ7	Probable ATP-dependent RNA helicase DDX27	22	22	27.6	27.6	86.604	0	64.237	6224400000	193	0.462563	0.729882		0.765872	0.267096	1.06396		0.214053	0.82426	-0.325169		3.59174	0.00162092	1.49985	ctrl_spe	3.73441	0.0017006	2.17148	AD_spe	0.482015	0.558618	0.199414
CIRBP	Q14011;K7EMY9;K7EPM4;K7EQR7;D6W5Y5;K7EJV1;K7EJV5;K7ER40;K7ENX8;K7ELV6;K7ELT6;F6WMK9	Q14011;K7EMY9;K7EPM4;K7EQR7;D6W5Y5;K7EJV1;K7EJV5;K7ER40	Cold-inducible RNA-binding protein	11	11	59.3	59.3	18.648	0	140.13	21584000000	183	0.860009	1.8533		2.43361	0.00740828	-2.89351		0.613053	0.56958	-1.04174		5.6765	0.000444444	3.79772	ctrl_spe	1.86924	0.0241419	1.64349	AD_spe	2.29735	0.0759322	-0.966077	down0.5
RBM28	Q9NW13;C9JE21;C9JAA9;H7C5G8	Q9NW13	RNA-binding protein 28	19	19	28.7	28.7	85.737	0	75.612	6421200000	146	0.583716	1.04456		0.568447	0.436444	0.874353		0.120175	0.886722	-0.21918		3.49377	0.00177778	1.91599	ctrl_spe	6.38422	0	1.99184	AD_spe	0.083246	0.900511	0.049328
RPL9	D6RAN4;P32969;A0A2R8Y5Y7;E7ESE0;H0Y9R4;H0Y9V9	D6RAN4;P32969;A0A2R8Y5Y7;E7ESE0;H0Y9R4	60S ribosomal protein L9	9	9	44.2	44.2	20.775	0	28.897	24257000000	79	0.362455	1.00483		0.334396	0.552754	-0.506273		1.1762	0.337517	-1.84779		2.69491	0.00488889	3.39143	ctrl_spe	7.56228	0	3.88078	AD_spe	0.0651654	0.920359	0.101259
EIF2S2	P20042	P20042	Eukaryotic translation initiation factor 2 subunit 2	15	15	31.8	31.8	38.388	0	59.847	4369400000	88	NaN	0		NaN	1	0		NaN	1	0		3.92557	0.00114286	1.75323	ctrl_spe	2.72839	0.00758798	1.33916	AD_spe	0.7774	0.399098	-0.332851
SLC25A5	P05141;Q9H0C2	P05141	ADP/ATP translocase 2;ADP/ATP translocase 2, N-terminally processed	4	4	14.4	14.4	32.852	0	10.408	3577400000	117	1.15551	-1.1118		5.01231	0.00108176	-1.27986		0.307335	0.751572	-0.26606		2.00991	0.014062	2.02619	ctrl_spe	2.29977	0.0123569	1.27687	AD_spe	0.212364	0.800969	-0.228842
RPLP2	P05387;H0YDD8	P05387	60S acidic ribosomal protein P2	10	9	97.4	82.6	11.665	0	183.93	7531800000	89	0.30151	0.959549		NaN	1	0		0.951714	0.422079	-1.63349		3.18552	0.00251111	1.88992	ctrl_spe	3.2383	0.00323316	2.69669	AD_spe	0.372352	0.639384	0.217626
CUTA	C9IZG4	C9IZG4		4	1	27.4	6.7	14.401	0	33.829	8425500000	81	0.183487	0.197837		NaN	1	0		0.00901603	0.990968	-0.0113619		3.16346	0.00257923	2.81759	ctrl_spe	2.10351	0.0167778	1.71385	AD_spe	0.249364	0.767729	-0.235769
SRPK1	Q96SB4;H3BLV9;D6RBF8;D6RBM8	Q96SB4;H3BLV9	SRSF protein kinase 1	14	14	20.5	20.5	74.324	0	96.436	4311600000	104	0.750541	1.16085		1.24704	0.047335	2.04381		0.621779	0.568262	0.878055		0.501672	0.359478	0.544488		5.71621	0	2.19821	AD_spe	1.18461	0.28	0.657348
PHF6	Q8IWS0;A0A0D9SGE8;Q5JRC6;REV__J3QSD7;REV__Q9NYV4	Q8IWS0;A0A0D9SGE8;Q5JRC6	PHD finger protein 6	9	9	31.2	31.2	41.29	0	160.66	5518800000	61	0.231061	0.516082		0.59003	0.42682	1.68094		0.0411879	0.962155	0.112836		0.391286	0.470376	0.870793		2.69399	0.00767932	2.14468	AD_spe	0.468164	0.56686	0.72397
TUBB2A	Q13885	Q13885	Tubulin beta-2A chain	2	2	3.6	3.6	49.906	0	74.397	8386500000	87	3.28202	-0.829808		4.61591	0.00117778	-1.97489		1.30808	0.30891	-0.321351		1.12841	0.0915789	-3.57433		3.14949	0.0041809	1.83301	AD_spe	0.872489	0.376538	2.00599
NXF1	Q9UBU9;E9PIN3;B4E227;H0YDU0;E9PLA7;E9PMV7;E9PQA4	Q9UBU9;E9PIN3	Nuclear RNA export factor 1	15	15	23.3	23.3	70.182	0	50.91	3775600000	109	0.822993	1.06919		0.31168	0.564541	0.644417		0.014672	0.992521	0.0283513		0.330457	0.537392	0.433665		3.00394	0.00479245	2.02728	AD_spe	1.40593	0.21519	1.00667	up1
RPL37A	P61513;G5E9R3;C9J4Z3;Q6P4E4;E9PEL3;M0R0A1;M0R2L6;A6NKH3	P61513;G5E9R3;C9J4Z3;Q6P4E4;E9PEL3	60S ribosomal protein L37a	6	6	52.2	52.2	10.275	0	65.559	25143000000	67	0.709996	2.38793		NaN	1	0		1.67792	0.242697	-3.13944		0.0540143	0.912389	0.304842		4.62478	0.000237288	4.47738	AD_spe	1.51947	0.179919	3.40702	up1
RPL23	P62829;C9JD32;J3KT29;B9ZVP7;J3KTJ3;J3QQT9	P62829;C9JD32;J3KT29;B9ZVP7	60S ribosomal protein L23	9	9	54.3	54.3	14.865	0	24.824	11183000000	68	0.6476	1.42953		0.0908154	0.756348	-0.228061		0.693406	0.531639	-1.16762		0.608243	0.267619	1.52031		4.67281	0.00025	3.08968	AD_spe	0.698493	0.438082	1.13996
EIF2S1	P05198;H0YJS4;G3V4T5	P05198;H0YJS4;G3V4T5	Eukaryotic translation initiation factor 2 subunit 1	9	9	20.6	20.6	36.112	0	16.103	4578600000	55	0.235813	0.315696		0.0357896	0.88094	0.0875565		0.72115	0.5237	-0.714834		0.265321	0.610117	0.667732		2.47021	0.010419	1.3968	AD_spe	0.388941	0.621506	0.635765
RRP1B	Q14684	Q14684	Ribosomal RNA processing protein 1 homolog B	16	16	29.7	29.7	84.427	0	206.03	7065500000	145	0.0872889	0.231715		0.709721	0.327788	0.823336		0.451421	0.659217	-0.718683		0.526876	0.33386	1.29219		1.80188	0.0264528	1.79913	AD_spe	0.288646	0.719693	0.574107
ELAVL1	Q15717;M0QZR9;M0R055	Q15717;M0QZR9	ELAV-like protein 1	21	21	51.8	51.8	36.091	0	261.39	23976000000	240	3.66409	5.44013	ctrl_spe	5.16562	0.000707483	4.40969	AD_spe	0.38592	0.700857	-0.579852		3.89215	0.00118519	3.17655	ctrl_spe	0.756512	0.277336	1.79255		1.39967	0.2153	-1.61457	down1
PABPC1;PABPC3	P11940;E7EQV3;E7ERJ7;A0A087WTT1;H0YAR2;Q9H361;H0YAP2;H0YBN4;H0YB75;H0YAS6;H0YB86;E5RJB9;E5RH24;E5RGH3;Q4VXU2;H0YAS7;A0A6I8PS38;H0YAW6;A0A6I8PLA1;H0YC10;E5RHG7;Q96DU9;E5RGC4;E5RFD8	P11940;E7EQV3;E7ERJ7;A0A087WTT1;H0YAR2;Q9H361	Polyadenylate-binding protein 1;Polyadenylate-binding protein;Polyadenylate-binding protein 3	36	27	54.6	40.3	70.67	0	320.03	19852000000	318	3.7687	5.42742	ctrl_spe	4.17219	0.0018756	4.43819	AD_spe	0.500408	0.639911	-0.650518		3.31701	0.00221965	2.41139	ctrl_spe	0.164262	0.719349	0.351713		2.70866	0.0411818	-2.14915	down1
MRPS23	J3QLR8;Q9Y3D9	J3QLR8;Q9Y3D9	28S ribosomal protein S23, mitochondrial	13	13	57.9	57.9	17.517	0	112.2	6832400000	195	8.51964	4.62967	ctrl_spe	2.77846	0.00512303	3.62044	AD_spe	1.15294	0.342756	-0.705493		4.05219	0.000930233	2.13823	ctrl_spe	0.101274	0.799511	0.301985		2.56632	0.0516735	-2.35533	down1
MRPS5	P82675	P82675	28S ribosomal protein S5, mitochondrial	17	17	35.6	35.6	48.006	0	53.466	5221100000	194	5.42169	4.55665	ctrl_spe	3.8977	0.00191525	4.06223	AD_spe	0.528237	0.624226	-0.35316		4.23869	0.000617886	2.31534	ctrl_spe	0.627327	0.389192	1.25182		1.04198	0.314477	-1.04044
MRPL12	P52815;B4DLN1	P52815;B4DLN1	39S ribosomal protein L12, mitochondrial	8	8	47	47	21.348	0	23.611	5744100000	145	6.73793	4.48444	ctrl_spe	4.14467	0.00184906	4.23014	AD_spe	0.157724	0.862463	-0.134588		2.17109	0.0110126	1.65134	ctrl_spe	1.19727	0.0840521	1.86015		0.304484	0.705156	-0.331673
RPS12	P25398	P25398	40S ribosomal protein S12	8	8	59.8	59.8	14.515	0	77.197	62269000000	136	2.20984	4.25053	ctrl_spe	5.13455	0.000702703	6.2838	AD_spe	0.287584	0.764008	0.541196		4.07181	0.00090625	5.09984	ctrl_spe	0.768193	0.266971	3.35865		0.679257	0.450871	-1.7349
SRSF4	Q08170;A0A0D9SEM4;B4DJK0;B4DUA4	Q08170;A0A0D9SEM4	Serine/arginine-rich splicing factor 4	13	10	18.4	14.2	56.678	0	59.347	13463000000	158	9.81407	3.99087	ctrl_spe	5.68216	0.000896552	4.35075	AD_spe	2.04848	0.196	0.451859	up0.3	10.5073	0	2.78614	ctrl_spe	0.341087	0.576233	1.18849		1.35345	0.222433	-1.83121	down1
SRSF10	O75494;Q5JRI1;Q6IQ42;R4GMP8	O75494;Q5JRI1	Serine/arginine-rich splicing factor 10	13	10	32.8	28.2	31.3	0	41.837	8306300000	141	6.85782	3.90522	ctrl_spe	5.28408	0.000737589	4.66061	AD_spe	4.06084	0.033	0.739099	up0.5	5.75208	0.000473684	2.71435	ctrl_spe	0.512923	0.463904	1.08492		1.12935	0.296629	-1.06381
MRPL38	Q96DV4	Q96DV4	39S ribosomal protein L38, mitochondrial	18	18	35.5	35.5	44.596	0	34.815	4630700000	226	6.26467	3.89194	ctrl_spe	3.9178	0.00193162	3.90035	AD_spe	0.0242645	0.984022	-0.024669		1.34827	0.0558084	1.18076	ctrl_spe	0.400052	0.535846	0.543957		1.84637	0.12936	-1.29147	down1
MRPS33	Q9Y291;C9JBY7	Q9Y291;C9JBY7	28S ribosomal protein S33, mitochondrial	4	4	45.3	45.3	12.629	0	13.601	4188900000	94	5.81271	3.61569	ctrl_spe	3.54888	0.00265649	3.20263	AD_spe	0.518323	0.632916	-0.334259		1.62789	0.0299394	1.03608	ctrl_spe	0.135622	0.758687	0.209895		1.86641	0.125592	-1.15508	down1
MRPL46	Q9H2W6;A0A087WT90	Q9H2W6	39S ribosomal protein L46, mitochondrial	9	9	29.7	29.7	31.705	0	42.632	5596000000	140	4.78536	3.38388	ctrl_spe	4.9534	0.00104878	4.90749	AD_spe	0.342447	0.732841	0.286198		2.73178	0.00469903	2.35557	ctrl_spe	0.315856	0.593911	0.845787		0.534167	0.535035	-0.78549
MRPL27	Q9P0M9;D6RAN8;H7C5U8;D6RE11;B3KN43	Q9P0M9;D6RAN8;H7C5U8	39S ribosomal protein L27, mitochondrial	8	8	50.7	50.7	16.073	0	27.664	4294000000	130	4.52353	3.38081	ctrl_spe	3.10382	0.00368601	3.52545	AD_spe	0.00866355	0.990348	-0.00828467		3.09246	0.00263102	1.63011	ctrl_spe	0.0464069	0.896088	0.133485		1.86712	0.126557	-1.69413	down1
MRPL17	Q9NRX2;E9PKV2	Q9NRX2;E9PKV2	39S ribosomal protein L17, mitochondrial	11	11	57.1	57.1	20.05	0	16.004	3252600000	115	4.54857	2.64758	ctrl_spe	3.95592	0.00198246	3.21487	AD_spe	0.11088	0.89685	0.092932		3.82319	0.00121986	1.32107	ctrl_spe	0.0765025	0.84058	-0.14966		1.38753	0.220422	-0.889679	down0.5
PRKRA	O75569;G5E9Q4;F8WEG8;C9JMM3	O75569;G5E9Q4	Interferon-inducible double-stranded RNA-dependent protein kinase activator A	12	12	33.2	33.2	34.404	0	59.523	9020100000	172	5.13849	2.53584	ctrl_spe	5.86457	0.000745098	4.17415	AD_spe	1.19861	0.327228	0.358024		4.65091	0.000509091	2.2483	ctrl_spe	0.746067	0.288157	2.04132		0.396376	0.613756	-0.621049
PRPF8	Q6P2Q9;I3L0J9;I3L3Z8;I3L1T8	Q6P2Q9	Pre-mRNA-processing-splicing factor 8	46	46	21.5	21.5	273.6	0	88.718	3987000000	263	2.91094	2.25652	ctrl_spe	5.20919	0.000722222	3.85735	AD_spe	2.45349	0.153875	0.811482	up0.5	1.30848	0.0615385	1.63279	ctrl_spe	0.866564	0.191771	0.89286		0.170437	0.819551	-0.219213
TCOF1	A0A6I8PRA0;Q13428;A0A3B3IS06;E7ETY2;H0YA99	A0A6I8PRA0;Q13428;A0A3B3IS06;E7ETY2	Treacle protein	10	10	7.9	7.9	125.18	0	113.83	3599500000	103	2.4673	1.95034	ctrl_spe	5.36816	0.00077037	3.66161	AD_spe	1.37118	0.286058	0.823211	up0.5	1.33754	0.057409	1.29473	ctrl_spe	1.00561	0.128605	1.26819		0.152245	0.840929	0.200481
MRPS28	Q9Y2Q9;H7C5V3;H0YAT2;E5RGC7;E5RFT8;E5RK86;E5RFH3;H0YC42;U3KQQ8	Q9Y2Q9;H7C5V3;H0YAT2;E5RGC7	28S ribosomal protein S28, mitochondrial	9	9	35.3	35.3	20.843	0	31.419	5354800000	128	7.17382	4.57515	ctrl_spe	4.14541	0.00186667	4.48825	AD_spe	0.451498	0.660628	-0.334961		1.56392	0.0346667	2.14492	ctrl_spe	0.246408	0.644607	-0.816785		2.15503	0.0835676	-2.97196	down1
EIF4A3	P38919;I3L3H2	P38919;I3L3H2	Eukaryotic initiation factor 4A-III;Eukaryotic initiation factor 4A-III, N-terminally processed	19	16	36.5	30.4	46.871	0	89.862	3280800000	174	3.3742	3.81584	ctrl_spe	4.88145	0.00101775	4.03269	AD_spe	0.0277071	0.979555	0.0406271		3.20688	0.00254545	1.77696	ctrl_spe	0.786478	0.249584	-1.52708		5.97261	0.00133333	-3.50148	down1
GADD45GIP1	Q8TAE8	Q8TAE8	Growth arrest and DNA damage-inducible proteins-interacting protein 1	10	10	46.8	46.8	25.384	0	45.027	2479700000	121	6.11291	2.96626	ctrl_spe	2.70297	0.00565644	3.06312	AD_spe	0.846799	0.473875	-0.444626		1.37418	0.0528389	1.27472	ctrl_spe	0.201607	0.68488	-0.401233		1.72129	0.145709	-1.52598	down1
MRPL22	J3KQY1;E7ESL0;Q9NWU5	J3KQY1;E7ESL0;Q9NWU5	39S ribosomal protein L22, mitochondrial	7	7	34.5	34.5	26.475	0	27.528	3485100000	103	4.58791	2.61126	ctrl_spe	4.34651	0.00122449	2.91565	AD_spe	0.348296	0.728337	-0.235374		2.87215	0.00384158	1.64795	ctrl_spe	0.239082	0.650947	-0.546182		3.65962	0.0145714	-2.85922	down1
PARP1	P09874;Q5VX84;Q5VX85	P09874	Poly [ADP-ribose] polymerase 1	54	54	48.3	48.3	113.08	0	220.62	13245000000	578	4.46289	6.31597	ctrl_spe	6.99603	0	6.83661	AD_spe	0.33594	0.733903	0.460635		0.579552	0.287014	1.31304		0.0456746	0.896907	-0.0466468		1.10721	0.299706	-1.49392
FYTTD1	Q96QD9;H9KVC6;H9KVD1;H9KVC1;H9KVD5	Q96QD9	UAP56-interacting factor	23	23	58.5	58.5	35.818	0	51.785	4509200000	211	3.3057	4.92945	ctrl_spe	6.94028	0	5.52002	AD_spe	0.00151489	0.997917	0.00300588		0.126148	0.811024	0.21734		1.10267	0.105154	1.1644		0.632554	0.474531	0.673717
RPS27A	P62979;J3QTR3;P0CG48;B4DV12;Q96C32;Q5PY61;J3QKN0;F5GXK7;F5H747;A0A2R8Y422;F5H388;F5H2Z3;F5H265;F5GYU3;F5H6Q2;J3QS39;P0CG47;M0R1M6;Q49A90;M0R1V7;F5GZ39;J3QSA3	P62979;J3QTR3	Ubiquitin-40S ribosomal protein S27a;Ubiquitin;40S ribosomal protein S27a	13	7	57.1	25.6	17.965	0	80.537	52407000000	231	3.49982	4.39844	ctrl_spe	3.27874	0.00317986	5.9839	AD_spe	1.30583	0.307753	0.570272	up0.5	0.485357	0.377526	0.204301		1.52459	0.0430202	0.550124		0.575755	0.511359	0.171027
MRPS15	P82914	P82914	28S ribosomal protein S15, mitochondrial	14	14	35	35	29.842	0	25.058	3888600000	165	5.32772	4.01015	ctrl_spe	3.75641	0.00223482	4.35067	AD_spe	0.355768	0.724315	-0.324244		0.940201	0.135542	1.16026		0.216863	0.672487	0.640734		0.531728	0.534046	-0.850092
MRPS2	Q9Y399;Q5T8A0	Q9Y399;Q5T8A0	28S ribosomal protein S2, mitochondrial	14	14	38.9	38.9	33.249	0	39.866	4628600000	112	6.88182	3.70803	ctrl_spe	2.46682	0.00720475	4.19348	AD_spe	0.659386	0.54911	-0.523565		0.822093	0.169025	1.39706		0.077623	0.839284	-0.157091		0.909377	0.363249	-1.20355
MRPS30	Q9NP92	Q9NP92	28S ribosomal protein S30, mitochondrial	7	7	15.9	15.9	50.364	0	19.802	2867300000	97	4.09204	3.27487	ctrl_spe	4.4035	0.00125	4.29612	AD_spe	0.144685	0.875402	0.15173		1.02138	0.114913	1.53971		0.0733818	0.845348	-0.135897		0.903108	0.3637	-1.11061
FMR1	A8MQB8;G3V0J0;A0A087WXI3;R9WNI0;Q8IXW7;A0A087WY29;A0A087WWR6;A0A087X1M7;A0A087WWU4	A8MQB8;G3V0J0;A0A087WXI3;R9WNI0		24	3	39.9	4.8	65.821	0	96.317	8479100000	206	1.5215	2.67761	ctrl_spe	7.59746	0	5.20474	AD_spe	2.06947	0.198615	2.24271	up1	1.16841	0.0851366	1.95381		1.17799	0.0879067	1.39919		0.123231	0.863641	-0.236391
SRSF7	Q16629;A0A0B4J1Z1;C9JAB2;F8WEA1;H7BZZ6	Q16629;A0A0B4J1Z1;C9JAB2	Serine/arginine-rich splicing factor 7	9	9	34.5	34.5	27.366	0	70.617	10684000000	134	3.02013	2.12272	ctrl_spe	4.20828	0.00161538	1.95441	AD_spe	1.55412	0.250109	0.339566	up0.3	1.7583	0.021831	0.440847		1.02313	0.123695	2.51547		0.605526	0.490577	-0.867694
FARP1	C9JME2;Q9Y4F1;A0A1B0GV68;M0QYB0;M0QXT1;H0Y783;M0R262	C9JME2;Q9Y4F1;A0A1B0GV68	FERM, RhoGEF and pleckstrin domain-containing protein 1	17	17	20.1	20.1	122.09	0	89.927	7310200000	110	1.32283	1.80213	ctrl_spe	5.55258	0.000825397	3.22695	AD_spe	1.01257	0.396152	0.980924		0.932066	0.136679	1.73062		0.549914	0.440769	1.39246		0.180208	0.812058	0.429613
WIZ	B9EGQ5;A0A669KBG4;M0QXA7;A0A669KBH9;A0A2R8YFV2;A0A669KAV7;O95785	B9EGQ5;A0A669KBG4;M0QXA7;A0A669KBH9;A0A2R8YFV2;A0A669KAV7;O95785	Protein Wiz	14	14	22	22	89.054	0	43.361	2005900000	113	3.13458	1.86646	ctrl_spe	2.96236	0.00449007	2.10414	AD_spe	0.0857674	0.90624	-0.0626647		0.0461334	0.919525	0.0819306		0.50612	0.466186	0.659969		0.306367	0.70357	0.38429
STRBP	Q96SI9;H0YC91;Q5JPA5;E9PKQ0	Q96SI9	Spermatid perinuclear RNA-binding protein	23	23	36.9	36.9	73.652	0	67.627	5641000000	244	5.42968	4.2465	ctrl_spe	5.33437	0.000759124	5.04514	AD_spe	1.58858	0.250019	0.750325	up0.5	2.04858	0.0130866	-1.46796		0.247541	0.644458	-0.355445		2.0227	0.0940444	1.30951
SRRM1	A9Z1X7;Q8IYB3;E9PCT1;M0R088;M0R1E7;M0QXG5	A9Z1X7;Q8IYB3;E9PCT1;M0R088	Serine/arginine repetitive matrix protein 1	34	34	35	35	103.39	0	124.31	4862400000	162	2.25586	2.87849	ctrl_spe	6.2969	0.000585366	4.95767	AD_spe	1.6201	0.24932	1.42674	up1	NaN	1	0		0.197901	0.688118	0.68567		1.8655	0.124727	2.44107
SNRPD2	P62316;K7ERG4;K7EJB5	P62316;K7ERG4	Small nuclear ribonucleoprotein Sm D2	7	7	38.1	38.1	13.527	0	22.922	9207600000	85	3.23937	2.67442	ctrl_spe	4.12355	0.00184038	4.72162	AD_spe	0.976789	0.408995	0.670436		0.189874	0.714444	-0.645278		0.456309	0.500141	1.28634		0.866001	0.376653	1.8555
MRPL9	Q9BYD2;Q5SZR1;A0A1W2PPE5;A0A1W2PQB6;A0A1W2PS92;A0A1W2PPK1;A0A1W2PRK9	Q9BYD2;Q5SZR1	39S ribosomal protein L9, mitochondrial	14	14	37.8	37.8	30.243	0	41.799	2056100000	148	3.79738	2.55742	ctrl_spe	3.79213	0.00225306	2.82279	AD_spe	0.158693	0.862251	0.137078		0.578881	0.287031	-0.788605		0.104379	0.795314	-0.18431		0.486275	0.556165	0.581954
SNRPD1	P62314;J3QLR7;J3QLI9	P62314	Small nuclear ribonucleoprotein Sm D1	3	3	37.8	37.8	13.281	0	20.648	2661300000	69	1.82192	2.22973	ctrl_spe	3.64651	0.0023937	3.48596	AD_spe	0.486747	0.644726	0.594875		0.0240156	0.954494	-0.0917411		0.176384	0.704756	0.350628		0.228838	0.787622	0.549352
MRPS16	Q9Y3D3;A6ND22	Q9Y3D3;A6ND22	28S ribosomal protein S16, mitochondrial	6	6	40.9	40.9	15.345	0	19.387	2558500000	73	1.44945	2.04723	ctrl_spe	2.85564	0.00487742	3.39765	AD_spe	0.75864	0.512692	0.831607		0.114572	0.82419	-0.161901		0.690053	0.341356	0.746057		0.131432	0.865354	-0.150756
RBM4	Q9BWF3;E9PB51	Q9BWF3;E9PB51	RNA-binding protein 4	10	2	28.8	12.1	40.313	0	105.94	1348200000	96	4.15153	1.8903	ctrl_spe	5.44829	0.000793893	2.64874	AD_spe	0.568055	0.601118	0.240164		0.24279	0.63826	-0.411473		0.229547	0.659186	-0.406749		0.0812051	0.900977	0.135576
HMGB1;HMGB1P1	P09429;Q5T7C4;B2RPK0;P23497	P09429;Q5T7C4;B2RPK0	High mobility group protein B1;Putative high mobility group protein B1-like 1	10	9	36.3	32.1	24.893	0	22.983	3063700000	96	1.34643	1.75626	ctrl_spe	2.43043	0.00748083	3.58673	AD_spe	1.03607	0.387063	1.27451		0.170514	0.746261	0.560803		0.0393271	0.910502	0.131508		0.158345	0.835739	-0.440909
RTCB	Q9Y3I0	Q9Y3I0	tRNA-splicing ligase RtcB homolog	11	11	22.8	22.8	55.21	0	31.887	1851600000	91	3.91153	1.62307	ctrl_spe	3.64498	0.00238431	2.33033	AD_spe	0.172519	0.863239	0.0666289		0.37247	0.49001	-0.79605		0.437425	0.514	0.508446		0.603875	0.491266	0.859576
XRCC6	B1AHC9;P12956	B1AHC9;P12956	X-ray repair cross-complementing protein 6	8	8	18.6	18.6	64.283	0	23.036	1803300000	89	4.06108	1.79854	ctrl_spe	3.57845	0.00250193	2.0492	AD_spe	0.302933	0.752865	0.137443		1.09366	0.0973333	0.550201		0.0971889	0.803935	-0.169929		1.57896	0.173867	-0.955539
MRPS7	J3QLS3;Q9Y2R9;J3QQS1;J3KSI8;J3QKW2	J3QLS3;Q9Y2R9;J3QQS1;J3KSI8;J3QKW2	28S ribosomal protein S7, mitochondrial	14	14	46.5	46.5	31.704	0	141.85	6152000000	184	6.83308	4.77072	ctrl_spe	3.92661	0.00195671	4.37291	AD_spe	0.553509	0.608971	-0.332812		0.783337	0.181319	1.25328		NaN	1	0		3.91453	0.0103333	-3.50638
PTCD3	Q96EY7;B8ZZQ4;F8WE76	Q96EY7	Pentatricopeptide repeat domain-containing protein 3, mitochondrial	19	19	30.3	30.3	78.549	0	61.817	5061300000	197	5.77909	4.73358	ctrl_spe	3.13957	0.00373702	4.16979	AD_spe	0.686105	0.532086	-0.58612		0.263428	0.612104	0.453222		0.157659	0.727622	-0.375175		0.757324	0.407306	-1.00391
MRPS26	Q9BYN8	Q9BYN8	28S ribosomal protein S26, mitochondrial	19	19	60.5	60.5	24.211	0	43.782	3590700000	197	5.86473	4.54245	ctrl_spe	3.55771	0.00255385	4.1676	AD_spe	0.283095	0.768393	-0.244665		0.0036852	0.992753	-0.0111109		0.941293	0.15529	-1.37949		1.12586	0.295868	-1.55691
DAP3	P51398;V9GZ03;V9GYL9;V9GYJ9;V9GYA7;V9GZ61;V9GYC9;V9GYW1;V9GY11;V9GYJ3;V9GYF7	P51398;V9GZ03;V9GYL9;V9GYJ9;V9GYA7;V9GZ61;V9GYC9	28S ribosomal protein S29, mitochondrial	18	18	38.2	38.2	45.566	0	71.065	3180100000	148	6.2588	4.25333	ctrl_spe	2.86537	0.00480259	3.64663	AD_spe	1.07174	0.369648	-0.82098		0.132319	0.801015	0.288976		2.89911	0.00577982	-2.13193		2.15084	0.0833067	-1.96356
MRPS34	C9JJ19;P82930	C9JJ19;P82930	28S ribosomal protein S34, mitochondrial	13	13	55.1	55.1	26.332	0	55.015	4014600000	114	7.82121	4.24756	ctrl_spe	1.38153	0.03479	3.3299	AD_spe	0.852524	0.469678	-1.17284		0.0509003	0.915147	0.142328		0.341646	0.576925	-0.596896		0.154101	0.83857	-0.308474
MRPS9	P82933	P82933	28S ribosomal protein S9, mitochondrial	21	21	46	46	45.834	0	99.757	3870300000	159	6.66516	4.22142	ctrl_spe	4.49651	0.00128342	3.77606	AD_spe	1.41466	0.279508	-0.514386	down0.5	0.136908	0.794042	0.520536		1.08252	0.10788	-1.88521		0.959578	0.344812	-1.91511
MRPS31	Q92665	Q92665	28S ribosomal protein S31, mitochondrial	16	16	37.2	37.2	45.318	0	101.31	3817000000	168	10.4088	3.99582	ctrl_spe	2.85409	0.00486174	3.11661	AD_spe	1.1283	0.353913	-0.638873		0.839969	0.163267	1.24611		0.345898	0.573883	-0.831462		1.77089	0.13967	-2.11868
MRPL1	Q9BYD6;H0Y8N7	Q9BYD6;H0Y8N7	39S ribosomal protein L1, mitochondrial	13	13	41.5	41.5	36.908	0	78.496	3275000000	122	6.05569	3.74871	ctrl_spe	2.7026	0.00563914	3.13708	AD_spe	0.540535	0.617354	-0.359628		0.309582	0.557913	0.653847		0.431608	0.516848	-1.34046		1.12059	0.292276	-1.89771
MRPL19	P49406;S4R3W9;H7C2J0;A0A0A0MRF4;S4R455	P49406;S4R3W9	39S ribosomal protein L19, mitochondrial	15	15	42.8	42.8	33.535	0	40.372	3437800000	146	6.02253	3.69342	ctrl_spe	3.94818	0.0019738	3.89901	AD_spe	0.194514	0.843972	-0.161036		0.216158	0.675867	0.702188		0.66084	0.364498	-1.35051		0.995378	0.333056	-1.88288
MRPL39	Q9NYK5;C9JG87	Q9NYK5;C9JG87	39S ribosomal protein L39, mitochondrial	13	13	39.6	39.6	38.711	0	29.994	2460800000	144	4.38438	3.32356	ctrl_spe	4.52912	0.0012973	4.15254	AD_spe	0.00503681	0.992741	-0.00520081		0.33564	0.532116	0.748447		NaN	1	0		2.38632	0.068	-2.36475
MRPS14	O60783	O60783	28S ribosomal protein S14, mitochondrial	5	5	31.2	31.2	15.139	0	17.698	2209800000	74	5.80816	3.28497	ctrl_spe	3.2502	0.00315714	2.65574	AD_spe	0.205098	0.836993	-0.143678		0.00322676	0.992481	-0.00791974		0.996251	0.131758	-1.47263		0.914606	0.362715	-1.16047
MRPL24	Q96A35;X6RJ73;X6RHI2;X6RIR5	Q96A35;X6RJ73	39S ribosomal protein L24, mitochondrial	12	12	50.9	50.9	24.915	0	53.431	3462100000	126	6.22338	3.22182	ctrl_spe	2.87613	0.00475325	2.74645	AD_spe	0.161271	0.86002	0.121004		0.934165	0.136512	1.52632		0.167285	0.715919	-0.593564		1.50324	0.182623	-2.33612
SRP68	Q9UHB9;K7EN53;K7EQC2	Q9UHB9	Signal recognition particle subunit SRP68	16	16	29.3	29.3	70.729	0	126.73	1723900000	114	2.22891	1.66405	ctrl_spe	2.6426	0.00607808	1.24014	AD_spe	0.712071	0.525449	-0.457384		0.025437	0.952419	0.0795403		0.435942	0.514121	0.670357		0.286558	0.720349	0.557826
EFTUD2	Q15029;K7EP67;K7EJ74	Q15029;K7EP67	116 kDa U5 small nuclear ribonucleoprotein component	15	14	18.1	17.1	109.43	0	28.442	1675200000	119	1.35903	1.07974	ctrl_spe	3.46699	0.00271161	1.9233	AD_spe	0.940445	0.423897	0.523115		0.520459	0.339706	0.3649		0.0560392	0.875082	0.040631		0.820199	0.387899	-0.350724
DDX6	P26196;Q8IV96	P26196;Q8IV96	Probable ATP-dependent RNA helicase DDX6	19	19	46	46	54.416	0	319.8	12288000000	217	2.35226	4.9439	ctrl_spe	6.91029	0	5.43867	AD_spe	0.482609	0.645971	0.953884		0.86268	0.155708	-0.993116		0.583521	0.422012	-1.01565		0.110915	0.877161	-0.174038
MRPS25	P82663;E7EPW2	P82663;E7EPW2	28S ribosomal protein S25, mitochondrial	14	14	64.7	64.7	20.116	0	59.447	2948500000	113	8.45916	4.66217	ctrl_spe	5.84858	0.00072381	5.08295	AD_spe	0.145527	0.875072	-0.0936934		NaN	1	0		NaN	1	0		NaN	1	0
MRPL43	H0Y6Y8;B1AL05;Q8N983;H0YBU8;M0R051	H0Y6Y8;B1AL05;Q8N983;H0YBU8	39S ribosomal protein L43, mitochondrial	8	8	53.8	53.8	18.657	0	34.909	2459400000	101	5.78508	4.26608	ctrl_spe	4.91037	0.00103614	4.91984	AD_spe	0.013333	0.994134	0.0127331		0.897917	0.145589	-1.65603		NaN	1	0		0.856282	0.376867	-1.23689
MRPL13	Q9BYD1;E5RJI7;H0YAX3;E5RFI2	Q9BYD1;E5RJI7	39S ribosomal protein L13, mitochondrial	11	11	71.3	71.3	20.692	0	38.939	2979600000	121	5.97061	4.10309	ctrl_spe	4.31669	0.00140704	2.96679	AD_spe	0.397271	0.693414	-0.216907		0.274571	0.598566	-0.539832		0.0837703	0.8291	-0.194082		0.498104	0.550379	0.757427
MRPS24	Q96EL2;F8VYR5	Q96EL2	28S ribosomal protein S24, mitochondrial	7	7	35.9	35.9	19.015	0	30.197	1712000000	88	9.00796	3.59567	ctrl_spe	3.20233	0.00326761	2.66025	AD_spe	1.10228	0.361768	-0.500024		0.683216	0.222029	-0.853478		NaN	1	0		0.416857	0.602659	-0.440068
ELAVL4	B1APY9;P26378;A0A494C015;A0A494C0F8;A0A494C147;A0A0R4J2E6;A0A494BZW4	B1APY9;P26378;A0A494C015;A0A494C0F8;A0A494C147;A0A0R4J2E6	ELAV-like protein;ELAV-like protein 4	26	1	61.2	7.3	41.007	0	199.05	18255000000	202	2.11374	3.26008	ctrl_spe	3.59091	0.00243411	3.74961	AD_spe	0.201175	0.841073	-0.354158		0.323785	0.543486	0.584758		0.825975	0.217928	-1.54665		1.12234	0.292407	-1.43868
SAFB	Q15424;K7EII0;K7ES42	Q15424	Scaffold attachment factor B1	13	9	18.6	14.4	102.64	0	49.548	1464300000	122	3.53818	3.1888	ctrl_spe	5.77213	0.000697248	4.24982	AD_spe	0.146481	0.874703	0.156764		0.399197	0.463951	-1.22176		NaN	1	0		0.667075	0.456212	-1.25803
ICT1	Q14197;J3KS15;J3QRF8	Q14197;J3KS15	Peptidyl-tRNA hydrolase ICT1, mitochondrial	7	7	38.3	38.3	23.63	0	38.651	2366100000	71	3.48844	3.10907	ctrl_spe	3.03315	0.00387919	3.6782	AD_spe	0.142285	0.871796	-0.189774		0.0841713	0.866076	-0.271946		0.928507	0.161197	-1.11553		0.596719	0.496573	-1.06045
FN3K	Q9H479	Q9H479	Fructosamine-3-kinase	8	8	27.2	27.2	35.171	0	20.589	1676800000	84	3.94036	3.0357	ctrl_spe	5.47092	0.0008	2.69074	AD_spe	0.373524	0.713546	0.224404		0.87625	0.15137	-1.26253		0.86703	0.191632	-1.7601		0.860989	0.374502	-1.22076
MRPL2	Q5T653;A0A669KAX9;C9IY40;C9JZW2;C9JZG7	Q5T653;A0A669KAX9	39S ribosomal protein L2, mitochondrial	9	9	27.2	27.2	33.3	0	44.755	1715600000	83	3.73192	2.98388	ctrl_spe	3.07588	0.00383673	3.21454	AD_spe	0.070133	0.92169	0.06926		0.175563	0.739421	-0.590111		1.36369	0.059211	-1.86651		0.654073	0.460561	-1.29438
MRPL44	Q9H9J2	Q9H9J2	39S ribosomal protein L44, mitochondrial	10	10	30.4	30.4	37.535	0	40.177	942320000	79	4.54503	2.96028	ctrl_spe	2.76734	0.00528302	2.49341	AD_spe	0.303574	0.754822	-0.233239		NaN	1	0		NaN	1	0		NaN	1	0
SRRM2	Q9UQ35;I3L182;I3L4D8;I3L1I8;A0A087X1W1;I3L1C0	Q9UQ35;I3L182;I3L4D8	Serine/arginine repetitive matrix protein 2	17	17	8.7	8.7	299.61	0	67.318	1901500000	93	6.49515	2.91788	ctrl_spe	2.74713	0.005275	3.43884	AD_spe	0.759235	0.513833	0.54436		NaN	1	0		NaN	1	0		NaN	1	0
SRM	P19623;K7EL89;K7EKM4;K7ESL0;K7EQ47	P19623	Spermidine synthase	8	8	25.8	25.8	33.824	0	15.413	672920000	92	2.34583	2.75462	ctrl_spe	4.6221	0.00118436	3.3192	AD_spe	0.057418	0.940142	-0.0815535		NaN	1	0		0.521603	0.45711	-0.842927		1.1749	0.284707	0.886506
MRPL49	Q13405;H0YDP7;E9PNF1;E9PI78	Q13405;H0YDP7;E9PNF1	39S ribosomal protein L49, mitochondrial	8	8	45.2	45.2	19.198	0	39.794	999720000	63	3.61185	2.7239	ctrl_spe	2.68696	0.00571429	2.48728	AD_spe	0.099602	0.903297	-0.0952953		1.46225	0.0428037	-1.27776		NaN	1	0		0.351386	0.665504	-0.351058
RAC1;RAC2	P63000;B1AH77;B1AH80;P15153;J3KSC4;J3QLK0;B1AH78;P60763	P63000;B1AH77;B1AH80;P15153	Ras-related C3 botulinum toxin substrate 1;Ras-related C3 botulinum toxin substrate 2	4	4	16.7	16.7	21.45	0	6.4099	1025400000	46	1.47722	2.61055	ctrl_spe	6.03806	0.0005	3.91433	AD_spe	0.68281	0.532451	0.938402		NaN	1	0		NaN	1	0		NaN	1	0
MYO5A	Q9Y4I1;A0A087WY00;F8W6H6;G3V394;F8WE88;E7ERV5;O95317;Q9UES5;G3V3C9;Q9NQX4;Q9ULV0;H0YMK3;H0YM93;H0YM96;A0A0A0MR36	Q9Y4I1;A0A087WY00;F8W6H6;G3V394;F8WE88	Unconventional myosin-Va	68	68	37.8	37.8	215.4	0	322.19	9433900000	497	2.8366	2.57181	ctrl_spe	6.10391	0.000527473	5.75756	AD_spe	2.51678	0.144	1.56845	up1	1.57299	0.034165	-1.28316		3.56476	0.00227273	-2.44889		2.35089	0.0705263	-1.2326
MRPS18A	Q9NVS2;Q5QPA5	Q9NVS2;Q5QPA5	28S ribosomal protein S18a, mitochondrial	4	4	19.4	19.4	22.184	0	6.0177	562640000	35	3.89895	2.56229	ctrl_spe	1.34105	0.0374581	1.97268	AD_spe	0.264741	0.783889	-0.326147		NaN	1	0		NaN	1	0		NaN	1	0
MRPL53	Q96EL3	Q96EL3	39S ribosomal protein L53, mitochondrial	4	4	25.9	25.9	12.107	0	9.1698	1237600000	51	2.84126	2.48626	ctrl_spe	2.73645	0.00531269	3.03112	AD_spe	0.633889	0.563988	0.425108		NaN	1	0		NaN	1	0		NaN	1	0
MRPL45	A0A087X2D5;Q9BRJ2;A0A0G2JMS5;A0A087WU62	A0A087X2D5;Q9BRJ2;A0A0G2JMS5;A0A087WU62	39S ribosomal protein L45, mitochondrial	12	12	40.8	40.8	35.29	0	30.427	2031700000	74	1.7303	2.27543	ctrl_spe	4.36652	0.00123711	3.95838	AD_spe	0.134265	0.880682	0.2027		1.00086	0.118924	-1.38205		0.199628	0.686836	-0.600513		0.00695557	0.991127	-0.0169554
SNRPA	P09012;M0R268;M0QZG7;M0R221;M0R2B8;M0QXK2;M0R0G9	P09012;M0R268;M0QZG7;M0R221;M0R2B8;M0QXK2	U1 small nuclear ribonucleoprotein A	11	9	42.9	37.6	31.279	0	60.322	2358300000	84	1.72295	2.09984	ctrl_spe	2.38291	0.00801163	2.65545	AD_spe	0.841676	0.46826	0.958801		0.0489594	0.916692	0.169481		NaN	1	0		1.8216	0.131385	-2.44278
MAGOHB	Q96A72;F5H6N1;F5H124	Q96A72;F5H6N1	Protein mago nashi homolog 2	6	1	30.4	6.1	17.276	0	13.395	387910000	64	2.22229	2.09775	ctrl_spe	4.28921	0.0014	2.63582	AD_spe	0.0803387	0.911959	-0.0876486		NaN	1	0		NaN	1	0		NaN	1	0
SF3B3	Q15393;J3QRB2;J3QL37;I3L4G7;H3BMB0	Q15393	Splicing factor 3B subunit 3	20	20	19.4	19.4	135.58	0	61.792	1726000000	140	1.49474	2.00391	ctrl_spe	2.29737	0.00850575	1.55831	AD_spe	0.184978	0.849626	0.262318		0.716978	0.208067	-0.78528		1.67546	0.0324606	-1.82991		0.474653	0.563845	-0.486433
HSD17B10	Q99714;Q5H928	Q99714;Q5H928	3-hydroxyacyl-CoA dehydrogenase type-2	6	6	31	31	26.923	0	107.91	884550000	85	1.37569	1.86035	ctrl_spe	4.65303	0.00121143	2.63929	AD_spe	0.0702811	0.922642	-0.105506		1.31853	0.0604643	-1.21816		2.10784	0.0168362	-0.901825		0.034919	0.960718	0.0371898
RNPS1	H3BMM9;H3BTC0;Q15287;H3BMS0;H3BV80;H3BPG5;H3BUG0;H3BTY0;H3BUL0;H3BTR6;H3BNU7	H3BMM9;H3BTC0;Q15287;H3BMS0;H3BV80	RNA-binding protein with serine-rich domain 1	7	7	32.4	32.4	31.7	0	97.288	828560000	57	2.76509	1.82265	ctrl_spe	3.30667	0.00309025	2.10676	AD_spe	0.23867	0.80478	0.160421		0.318189	0.550074	-0.649281		NaN	1	0		0.600728	0.493327	-0.838966
NKRF	O15226	O15226	NF-kappa-B-repressing factor	15	15	30.4	30.4	77.672	0	46.007	1642100000	92	1.51297	1.62484	ctrl_spe	2.87986	0.00470358	2.40722	AD_spe	0.686382	0.533378	0.620798		0.387623	0.47408	-1.00229		0.425085	0.519597	-0.646995		0.225578	0.790108	0.470526
CELF2	E9PC62;A0A0J9YXJ0;Q5VZZ6;A0A0J9YX66;A0A1B0GU44;A0A1B0GUN8;O95319;V9GYD9;V9GY47;A0A0J9YXK1	E9PC62;A0A0J9YXJ0;Q5VZZ6;A0A0J9YX66;A0A1B0GU44;A0A1B0GUN8;O95319;V9GYD9	CUGBP Elav-like family member 2	11	9	22.1	18	55.731	0	28.555	922870000	56	1.44899	1.56295	ctrl_spe	2.16269	0.00948023	1.24298	AD_spe	0.0176376	0.98861	0.0224822		NaN	1	0		NaN	1	0		NaN	1	0
POLDIP3	Q9BY77;F6VRR5;F8WCX5;Q8WUT1;Q6R954;F8WEE2	Q9BY77;F6VRR5;F8WCX5	Polymerase delta-interacting protein 3	11	11	37.1	37.1	46.089	0	127.73	1920800000	113	1.75153	1.43707	ctrl_spe	3.10508	0.00369863	1.53435	AD_spe	0.327242	0.735873	-0.26026		0.0985107	0.844528	-0.163986		0.0296143	0.933103	-0.0693111		0.0232339	0.972735	0.0391123
NCBP1	Q09161;X6R941	Q09161	Nuclear cap-binding protein subunit 1	8	8	11.6	11.6	91.838	0	26.58	1305200000	61	1.89644	1.38686	ctrl_spe	3.41123	0.00274539	1.68786	AD_spe	0.217295	0.824693	0.170202		0.816745	0.171408	-1.11217		0.017298	0.961972	-0.0444991		1.02394	0.324299	1.18491
EEF1D	A0A087X1X7;E9PRY8;E9PIZ1;H0YCK7;E9PQR8;E9PJV8;E9PN56;E9PN71;E9PRL0;E9PQC9;H0YE58;E9PKH7;E9PNC8;H0YE72;E9PPY1	A0A087X1X7;E9PRY8		10	4	21.2	7.9	69.282	0	53.412	798820000	61	1.51141	1.25369	ctrl_spe	4.64781	0.00119774	1.49616	AD_spe	1.65104	0.244602	0.837386	up0.5	1.23743	0.0732011	-1.96904		1.44108	0.0507079	-1.89522		0.733397	0.421076	-0.996002
SDCBP	O00560;B4DHN5;E9PBU7;G5EA09	O00560;B4DHN5;E9PBU7;G5EA09	Syntenin-1	6	6	20.1	20.1	32.444	0	44.852	858370000	77	2.33806	1.21947	ctrl_spe	2.08009	0.0106704	2.42828	AD_spe	4.13712	0.036	1.13627	up1	0.944508	0.134571	-1.62357		1.35501	0.060153	-1.62535		0.105023	0.882239	-0.202911
C17orf85	Q53F19;K7ELP6	Q53F19	Uncharacterized protein C17orf85	10	10	18.1	18.1	70.592	0	52.453	1449800000	89	2.41951	1.19042	ctrl_spe	2.72366	0.00536615	1.65719	AD_spe	0.0224721	0.982036	-0.0137132		0.52935	0.332084	-0.783757		0.11805	0.778281	-0.180198		0.0722939	0.912241	0.113923
YTHDF2	Q9Y5A9;S4R3V3;S4R3J8	Q9Y5A9	YTH domain-containing family protein 2	5	4	9.5	7.9	62.333	0	17.181	594690000	48	2.1543	1.17242	ctrl_spe	1.35623	0.0366567	1.67946	AD_spe	0.190007	0.846507	0.188229		NaN	1	0		NaN	1	0		NaN	1	0
MRPL41	Q8IXM3	Q8IXM3	39S ribosomal protein L41, mitochondrial	5	5	38.7	38.7	15.383	0	9.4974	737330000	48	2.5206	1.10921	ctrl_spe	1.39421	0.0338492	1.68616	AD_spe	0.369884	0.711588	-0.2713		1.71234	0.024346	-1.72486		NaN	1	0		1.22615	0.269348	-1.019
RPS16	P62249;M0R210;M0R3H0;M0R1M5;Q6IPX4;M0QX76	P62249;M0R210;M0R3H0;M0R1M5;Q6IPX4	40S ribosomal protein S16	16	16	76	76	16.445	0	58.197	49799000000	370	1.13213	1.10376		7.02391	0	2.27567	AD_spe	0.237614	0.805146	0.219367		3.12398	0.00263784	2.77558	ctrl_spe	1.03009	0.121832	0.495474		0.434594	0.591456	-0.312929
MRPL18	Q9H0U6	Q9H0U6	39S ribosomal protein L18, mitochondrial	6	6	27.8	27.8	20.576	0	14.741	4569400000	85	1.02994	2.21061		3.96798	0.00199119	4.04244	AD_spe	0.449063	0.660947	0.804368		3.3082	0.00225287	2.36502	ctrl_spe	0.00572214	0.985756	-0.0231686		2.0702	0.0892381	-2.47367	down1
RPN1	P04843;B7Z4L4;F8WF32	P04843;B7Z4L4	Dolichyl-diphosphooligosaccharide--protein glycosyltransferase subunit 1	11	11	19.3	19.3	68.569	0	31.921	1945100000	134	0.955368	1.04009		2.37925	0.00798841	1.92389	AD_spe	0.441698	0.666155	0.395203		1.99273	0.0142989	1.08546	ctrl_spe	0.757748	0.277088	0.346746		2.1656	0.0836667	-0.752096	down0.5
ZNF512	G3XAG1;Q96ME7	G3XAG1;Q96ME7	Zinc finger protein 512	15	15	27.6	27.6	64.594	0	46.815	4068700000	123	0.627555	1.39295		5.74351	0.000684685	3.80415	AD_spe	0.806461	0.489926	1.16881		3.53301	0.00171069	1.21815	ctrl_spe	0.0232085	0.946995	0.0608883		1.02294	0.323835	-0.890546
MATR3	P43243;A8MXP9;A0A0R4J2E8;D6REM6;D6R991;H0Y8T4;B3KM87;D6RBK5;D6R8Z5;D6RBI2;D6RE02;D6RIA2;Q68E03;D6RAY2;D6RAM9;D6REK4;A0A1B0GX04;D6RCM3;D6RBS2;D6R9F3;D6RB45	P43243;A8MXP9;A0A0R4J2E8;D6REM6;D6R991	Matrin-3	34	34	35.5	35.5	94.622	0	113.08	39690000000	622	4.89348	0.820223		6.89685	0	2.41531	AD_spe	0.934662	0.426376	-0.128145		6.47236	0.000145455	1.06196	ctrl_spe	0.919375	0.165566	0.18316		2.16694	0.0846197	-0.234833
RPS11	P62280;M0QZC5;M0R1H6;M0R1H5	P62280;M0QZC5	40S ribosomal protein S11	17	17	70.9	70.9	18.431	0	82.83	76250000000	360	0.614835	0.860372		6.62314	0	4.2685	AD_spe	0.375347	0.713646	0.400889		1.55559	0.0352443	1.42107	ctrl_spe	1.29283	0.0685606	0.761414		0.0342961	0.96055	-0.0403245
AP2M1	A0A087WY71;E9PFW3;Q96CW1;C9JJ47;C9JTK4;C9JGT8;C9JJD3;C9JPV8;H7C4C3	A0A087WY71;E9PFW3;Q96CW1;C9JJ47	AP-2 complex subunit mu	11	11	27.6	27.6	49.526	0	24.257	3436300000	131	1.07656	1.13812		4.09148	0.00182326	3.25216	AD_spe	2.53976	0.143724	1.54558	up1	0.792954	0.179453	0.809507		0.179959	0.700642	0.442634		0.199231	0.807886	-0.302178
C11orf98	E9PRG8;E9PLD3;A0A494BXY3	E9PRG8	Uncharacterized protein C11orf98	7	7	48.8	48.8	14.234	0	59.215	5659500000	68	0.854481	1.54097		1.40413	0.0334518	2.55251	AD_spe	0.921978	0.429138	1.34549		0.122817	0.814117	0.318581		0.704016	0.331052	1.38747		0.635103	0.475527	1.06428
SCAF1	Q9H7N4	Q9H7N4	Splicing factor, arginine/serine-rich 19	10	10	10.4	10.4	139.27	0	95.768	1519800000	70	0.757679	1.04918		3.63389	0.00236576	2.55996	AD_spe	1.73152	0.233048	1.41613	up1	1.24096	0.0730743	-1.60323		0.14644	0.745538	0.238274		1.56628	0.173727	1.46463
MBD1	A0A0A0MS90;Q9UIS9;K7EPZ6;K7EN65;K7EMA9	A0A0A0MS90;Q9UIS9;K7EPZ6;K7EN65	Methyl-CpG-binding domain protein 1	6	6	9.9	9.9	62.4	0	15.188	1158600000	50	0.438764	0.421754		3.80425	0.0021893	2.00753	AD_spe	1.04661	0.384554	0.589434		2.11921	0.0114818	-1.55216		0.716768	0.316536	0.49958		3.46926	0.0162105	1.63683
ZNF22	P17026	P17026	Zinc finger protein 22	5	5	24.6	24.6	25.915	0	27.051	3488200000	80	0.436015	0.561331		4.03284	0.00190045	1.70397	AD_spe	2.68953	0.11037	1.60013	up1	0.58259	0.285239	0.874791		0.328233	0.584201	0.822719		0.287702	0.719949	-0.515851
THRAP3	A0A3B3ITZ9;Q9Y2W1	A0A3B3ITZ9;Q9Y2W1	Thyroid hormone receptor-associated protein 3	36	36	35.3	35.3	103.52	0	231.37	9117200000	361	0.426926	0.488631		3.98206	0.00200889	1.98449	AD_spe	0.680109	0.532533	0.51342		4.0319	0.000923077	-1.59441		0.281462	0.61192	0.203457		4.68856	0.00285714	1.45688
BCLAF1	Q9NYF8;E9PK91;E9PQN2;E9PKI6;E9PK09;A0A1W2PQ43;E9PJA7;H0YF00;H0YF14;H0YF63	Q9NYF8;E9PK91;E9PQN2;E9PKI6;E9PK09;A0A1W2PQ43;E9PJA7	Bcl-2-associated transcription factor 1	23	23	28.3	28.3	106.12	0	64.649	4499300000	233	0.408914	0.548055		6.30546	0.0006	4.81917	AD_spe	0.812527	0.484708	0.670849		0.332445	0.535844	-0.89531		0.770735	0.26511	1.2397		1.63627	0.162551	2.13877
TEX10	Q9NXF1;A0A0A0MSR3	Q9NXF1	Testis-expressed sequence 10 protein	17	17	21.5	21.5	105.67	0	58.465	1429300000	106	0.35071	0.594115		4.88504	0.00102381	2.53956	AD_spe	1.8114	0.22384	1.41689	up1	NaN	1	0		0.373655	0.555496	-0.183346		3.3826	0.0170909	2.29217
GNL2	Q13823;H0YG10	Q13823	Nucleolar GTP-binding protein 2	19	19	29.8	29.8	83.654	0	45.68	2268600000	110	0.280853	0.607068		3.12929	0.00372414	1.66245	AD_spe	0.865747	0.46568	1.0185		0.377394	0.485865	-0.582153		0.602954	0.406923	0.618877		0.117473	0.867873	0.166107
EWSR1	B0QYK0;Q01844;H7BY36;A0A0D9SFL3;C9JGE3	B0QYK0;Q01844;H7BY36;A0A0D9SFL3;C9JGE3	RNA-binding protein EWS	6	6	15.9	15.9	64.929	0	84.176	4290300000	97	0.141023	0.0522995		2.66725	0.00575758	1.60886	AD_spe	0.00993799	0.993053	0.00402387		0.452323	0.414396	0.768952		1.01202	0.126863	1.37807		0.854368	0.377422	0.921839
RPS3	P23396;E9PL09;E9PPU1;F2Z2S8;H0YCJ7;H0YF32;E9PQ96;E9PJH4;E9PK82;H0YEU2;E9PSF4;E9PQX2;H0YES8	P23396;E9PL09;E9PPU1;F2Z2S8;H0YCJ7;H0YF32;E9PQ96;E9PJH4;E9PK82	40S ribosomal protein S3	23	23	73.3	73.3	26.688	0	69.68	39604000000	345	0.0754296	0.0715917		3.92234	0.00193991	1.49695	AD_spe	1.92213	0.219161	0.719689	up0.5	1.16056	0.0864457	0.824173		1.53025	0.0430377	0.636624		0.40524	0.610307	0.217078
LSM14A	Q8ND56;K7EMZ9;A0A140TA76;A0A140TA66;I3L4Q1;A0A0G2JQ95;A0A096LP11	Q8ND56;K7EMZ9;A0A140TA76	Protein LSM14 homolog A	13	13	23.3	23.3	50.529	0	40.653	3215000000	71	0.0632765	0.141427		5.28742	0.000748201	4.07707	AD_spe	1.58243	0.250462	1.40066	up1	0.892778	0.147143	-1.80668		0.082934	0.829351	-0.246082		0.402638	0.610119	0.832141
TRA2A	Q13595;F8WEH2	Q13595	Transformer-2 protein homolog alpha	8	8	25.5	25.5	32.688	0	27.46	2491800000	95	1.07937	1.56876		3.14912	0.00369444	2.88723	AD_spe	0.593246	0.575707	0.693714		1.13588	0.0902599	1.03924		0.181623	0.70166	-0.484655		2.20933	0.0824242	-2.14415
RPS20	P60866;E5RJX2;E5RIP1;G3XAN0	P60866;E5RJX2;E5RIP1	40S ribosomal protein S20	7	7	37.8	37.8	13.373	0	43.829	25769000000	186	0.749869	1.40561		1.80062	0.0143893	1.0132	AD_spe	1.07061	0.36868	1.03127		0.363312	0.499168	0.298918		0.860725	0.194478	0.636247		0.203674	0.804284	0.131384
SOGA3	E9PJP2;Q5TF21;H3BRB8;J3QL92;Q9Y4B5	E9PJP2;Q5TF21;H3BRB8	Protein SOGA3	12	12	15.7	15.7	102.88	0	26.156	288150000	56	3.22066	0.890981		1.38933	0.0339749	1.04236	AD_spe	2.36997	0.166171	0.427486	up0.3	NaN	1	0		NaN	1	0		NaN	1	0
MRPS21	P82921	P82921	28S ribosomal protein S21, mitochondrial	4	4	42.5	42.5	10.688	0	26.055	445890000	24	NaN	0		1.52706	0.0261546	1.87636	AD_spe	2.2991	0.175158	1.9299	up1	NaN	1	0		NaN	1	0		NaN	1	0
NHP2L1	P55769;B1AHD1;A0A3B3IUA2;A0A3B3IRU2	P55769;B1AHD1;A0A3B3IUA2	NHP2-like protein 1;NHP2-like protein 1, N-terminally processed	4	4	25	25	14.173	0	12.255	857640000	43	1.24004	1.14532		1.83415	0.0137587	1.43859	AD_spe	0.395365	0.691371	0.308439		NaN	1	0		NaN	1	0		NaN	1	0
EEF2	P13639	P13639	Elongation factor 2	10	10	12.9	12.9	95.337	0	28.351	2753800000	102	1.22834	1.3274		2.13336	0.00982022	2.21671	AD_spe	0.333867	0.734281	0.347042		0.492575	0.369432	1.1915		0.192058	0.688427	-0.612787		0.787913	0.398279	-1.545
PGAM5	Q96HS1;F5GXG4	Q96HS1	Serine/threonine-protein phosphatase PGAM5, mitochondrial	10	10	31.1	31.1	32.004	0	16.659	2257700000	58	1.14948	1.11586		1.97652	0.0119451	2.46327	AD_spe	1.39246	0.28974	1.0774	up1	0.589666	0.279403	-1.294		0.88155	0.184872	-1.46113		0.103866	0.880612	-0.239182
TOP1	P11387;E5RIC7;Q969P6;E5RJ95;E5RFS0;E5RJ33;H0YBR3;H0YC03;E5RGE7;E5RGR4;E5RFE3;E5RGR2	P11387	DNA topoisomerase 1	24	24	31.6	31.6	90.725	0	62.469	3657700000	119	1.02387	2.07386		2.05806	0.0109638	1.58178	AD_spe	0.259343	0.785346	-0.491586		0.160184	0.759858	-0.286355		0.0149082	0.96628	0.0358416		0.14961	0.840509	-0.239325
ELAVL3	Q14576;K7EPB5	Q14576	ELAV-like protein 3	13	13	37.9	37.9	39.547	0	176.86	8514400000	107	0.988961	2.4727		3.05897	0.00381081	2.709	AD_spe	0.0951799	0.907498	-0.248867		NaN	1	0		1.51855	0.0432529	-1.82537		0.0846192	0.898994	-0.11474
BYSL	Q13895;H7BY94;F8WBL2	Q13895	Bystin	12	12	31.4	31.4	49.601	0	50.229	1194100000	83	0.860955	0.904645		1.37565	0.0350324	1.90684	AD_spe	0.168435	0.863853	-0.211794		0.531264	0.331739	-0.688387		1.42163	0.0527709	-0.911968		0.0922016	0.892828	-0.115321
PABPC4	B1ANR0;Q13310;H0Y5F5;H0YEU6;H0YCC8;H0YEQ8;B1ANR1;H0YER0;H0Y6X6;P0CB38	B1ANR0;Q13310;H0Y5F5	Polyadenylate-binding protein;Polyadenylate-binding protein 4	13	12	24.9	23.4	67.97	0	44.996	3124000000	79	0.811787	1.56747		2.94545	0.00452632	2.12093	AD_spe	0.12781	0.878787	-0.236624		0.23295	0.650452	-0.517198		1.00006	0.130384	-1.21934		1.06458	0.313526	-1.32988
LBR	A0A494C1L1;Q14739;C9JXK0;C9JES9	A0A494C1L1;Q14739;C9JXK0	Lamin-B receptor	10	10	23.4	23.4	46.925	0	21.712	2401700000	74	0.779097	-0.648539		4.50189	0.00129032	1.99472	AD_spe	3.73986	0.0473333	1.49882	up1	0.98029	0.125168	0.848313		0.0575126	0.872355	-0.125624		0.517931	0.540271	-0.568501
AP2A1	O95782	O95782	AP-2 complex subunit alpha-1	12	8	12.6	8.8	107.54	0	22.68	936480000	76	0.743783	0.562098		1.90353	0.0129071	1.46916	AD_spe	0.359411	0.724812	0.273308		0.972636	0.12686	-0.8828		0.920829	0.165545	-1.21549		0.438187	0.589308	-0.46706
ZNF462	Q96JM2;H3BLX4;H0Y6H9	Q96JM2;H3BLX4	Zinc finger protein 462	35	35	17.5	17.5	284.68	0	96.884	2893700000	148	0.689033	1.29681		1.47099	0.0291722	2.30892	AD_spe	0.245011	0.799855	0.460123		0.133016	0.800823	-0.34356		0.125208	0.771028	0.354751		0.122191	0.86417	0.286507
NCBP2	P52298;C9JQX9;B3KSB0;F8WE41;A6PVI3	P52298;C9JQX9;B3KSB0	Nuclear cap-binding protein subunit 2	7	7	38.5	38.5	18.001	0	15.778	2060000000	75	0.670108	1.69031		3.43701	0.00268148	2.79837	AD_spe	0.481452	0.642854	0.88973		0.0573004	0.909136	0.135109		NaN	1	0		1.74957	0.141522	-1.6898
EIF2A	Q9BY44;F8WAE5;C9IZE1;H7C5R5;H7C5Q3;F8WF18;F8WAT3	Q9BY44;F8WAE5	Eukaryotic translation initiation factor 2A;Eukaryotic translation initiation factor 2A, N-terminally processed	15	15	37.4	37.4	64.989	0	93.595	2634600000	87	0.618583	0.887648		3.39029	0.00272527	1.3574	AD_spe	1.26238	0.316826	0.887082		0.416759	0.447096	-0.648781		0.096598	0.803961	-0.379447		0.0881505	0.897152	-0.218595
LYAR	Q9NX58	Q9NX58	Cell growth-regulating nucleolar protein	12	12	30.9	30.9	43.614	0	63.995	1774500000	78	0.607325	0.968222		1.67113	0.0193927	2.14555	AD_spe	0.198835	0.840749	0.300101		0.104032	0.839722	0.162082		1.22266	0.0808211	-1.65002		2.09042	0.0875122	-1.74836
PURB	Q96QR8	Q96QR8	Transcriptional activator protein Pur-beta	8	5	22.8	16.3	33.24	0	21.465	966690000	68	0.538512	0.650881		2.61832	0.00610149	2.39337	AD_spe	2.23995	0.178095	1.48529	up1	0.80776	0.174536	-0.916786		NaN	1	0		0.811633	0.392629	-0.678156
TRIM28	Q13263;M0R0K9;M0R3C0;M0R2I3	Q13263	Transcription intermediary factor 1-beta	27	27	30.7	30.7	88.549	0	281.15	11253000000	333	0.513005	0.155263		6.13627	0.000533333	1.80874	AD_spe	1.23395	0.323503	0.227096		0.146454	0.779963	-0.213435		2.43648	0.0108171	-0.708171		0.76002	0.407221	-0.573602
ZNF667	Q5HYK9;A0A0D9SFC3;K7EIE0;K7EQ15;M0QX02;K7ERY5;Q8NA42	Q5HYK9;A0A0D9SFC3	Zinc finger protein 667	10	10	16.6	16.6	70.16	0	16.28	479210000	37	0.493073	0.48056		1.83733	0.0137634	1.91469	AD_spe	2.10547	0.190118	1.03322	up1	NaN	1	0		NaN	1	0		NaN	1	0
MRPL21	Q7Z2W9;H3BUY0;F5H7V8	Q7Z2W9;H3BUY0	39S ribosomal protein L21, mitochondrial	7	7	32.2	32.2	22.814	0	16.698	1044700000	42	0.469794	0.697244		1.73545	0.0163492	2.77643	AD_spe	1.54281	0.254054	1.69368	up1	NaN	1	0		NaN	1	0		NaN	1	0
DNAJC9	Q8WXX5	Q8WXX5	DnaJ homolog subfamily C member 9	6	6	26.9	26.9	29.909	0	16.154	1056100000	38	0.306072	0.491264		1.97943	0.011978	1.08432	AD_spe	1.82696	0.232914	1.3285	up1	0.776158	0.183342	-0.907311		0.282192	0.613212	-0.81195		0.277196	0.73106	0.498027
RRP15	Q9Y3B9	Q9Y3B9	RRP15-like protein	7	7	20.2	20.2	31.484	0	24.482	2673000000	62	0.263865	0.339034		2.1219	0.00990476	1.77454	AD_spe	0.00946637	0.992802	0.0123207		0.0493829	0.917028	0.0950207		0.013154	0.968928	0.0296739		0.423745	0.597081	-0.574403
PPAT	Q06203;D6RCC8;D6RE15	Q06203	Amidophosphoribosyltransferase	5	5	12.2	12.2	57.398	0	18.349	175040000	53	0.20829	0.497384		2.31569	0.00841499	1.08341	AD_spe	0.0880909	0.9068	0.157932		NaN	1	0		1.32752	0.0636957	-1.19928		0.497712	0.549618	0.489025
MRPL33	O75394	O75394	39S ribosomal protein L33, mitochondrial	2	2	20	20	7.6191	0	6.6394	1037000000	44	0.156383	0.321257		1.54768	0.0249534	1.57868	AD_spe	0.626916	0.567253	0.733844		0.618528	0.259928	-0.838916		1.40949	0.0541717	-1.6455		0.42055	0.598915	-0.491088
ZNF362	Q5T0B9;F5H055;O43309	Q5T0B9	Zinc finger protein 362	10	6	26.7	17.9	45.814	0	21.354	1300500000	53	0.139261	0.171156		2.84171	0.00492013	1.77663	AD_spe	2.23072	0.176186	0.739236	up0.5	0.743875	0.195677	-0.974016		NaN	1	0		1.76384	0.140764	-1.5321
MAP7D1	Q3KQU3;H0YF21;C9JIR3;E9PLH3	Q3KQU3	MAP7 domain-containing protein 1	17	17	22.1	22.1	92.819	0	55.159	1206200000	73	0.12513	0.214257		2.04392	0.0109556	1.3322	AD_spe	1.81781	0.226849	1.31819	up1	NaN	1	0		0.352218	0.570518	-0.780409		0.975522	0.340878	1.10507
HIST2H2BE;HIST1H2BB;HIST1H2BO;HIST1H2BJ	Q16778;P33778;P23527;P06899;Q6DRA6;Q6DN03	Q16778;P33778;P23527;P06899	Histone H2B type 2-E;Histone H2B type 1-B;Histone H2B type 1-O;Histone H2B type 1-J	3	1	9.5	9.5	13.92	0	7.1539	36702000000	73	0.0981273	0.266931		5.78842	0.000703704	1.84354	AD_spe	0.33824	0.733255	0.53914		0.672806	0.2277	2.41656		0.363822	0.563893	1.72376		0.243012	0.773546	-0.977125
HIST1H2AC;HIST3H2A;HIST1H2AB	Q93077;Q7L7L0;P04908;A0A3B3IS11	Q93077;Q7L7L0;P04908	Histone H2A type 1-C;Histone H2A type 3;Histone H2A type 1-B/E	2	2	13.8	13.8	14.105	0	14.922	12475000000	67	0.0390921	0.178978		6.09216	0.000521739	4.44112	AD_spe	1.32776	0.302873	2.41768	up1	1.21325	0.0769805	2.50633		0.0300538	0.933454	0.168832		1.05295	0.316448	-2.45734
MRPL47	Q9HD33	Q9HD33	39S ribosomal protein L47, mitochondrial	13	13	46	46	29.45	0	33.215	2447000000	99	6.09862	3.39669	ctrl_spe	0.918312	0.133468	1.87966		1.37583	0.287941	-1.34927	down1	2.27478	0.00925957	1.48577	ctrl_spe	0.313685	0.593341	-0.894207		1.81257	0.130981	-1.89753	down1
FUS	H3BPE7;P35637	H3BPE7;P35637	RNA-binding protein FUS	8	6	14	14	53.496	0	116.64	9719800000	146	2.44037	2.17994	ctrl_spe	0.454191	0.495536	0.852619		1.19622	0.326814	0.707938		3.08835	0.00273016	2.28349	ctrl_spe	0.938795	0.15622	1.8396		0.566779	0.515319	-0.737554
SNRPD3	P62318;H3BT13	P62318	Small nuclear ribonucleoprotein Sm D3	5	5	24.6	24.6	13.916	0	14.398	5069800000	70	6.51097	3.94525	ctrl_spe	0.29229	0.574906	1.05628		1.98896	0.207103	-2.43866	down1	0.0854073	0.866058	-0.242914		0.183768	0.69932	0.458078		0.0503563	0.940135	0.126019
MRPS35	P82673;H0YG82	P82673	28S ribosomal protein S35, mitochondrial	13	13	47.4	47.4	36.844	0	89.623	1965500000	118	8.05018	3.30276	ctrl_spe	0.833878	0.194102	1.85853		0.946265	0.423721	-1.04767		0.0268097	0.953212	-0.0808078		0.00316929	0.991927	0.00849533		0.0708281	0.913576	-0.168503
MRPL4	K7ELQ0;K7ES61;X6RAY8;Q9BYD3;K7EKI4;K7ELF1;K7EJ73	K7ELQ0;K7ES61;X6RAY8;Q9BYD3;K7EKI4;K7ELF1	39S ribosomal protein L4, mitochondrial	7	7	40.5	40.5	24.446	0	66.745	1983000000	95	5.65449	2.29193	ctrl_spe	0.583513	0.428415	0.822665		3.02044	0.102462	-1.32136	down1	0.31892	0.549949	0.748883		0.919593	0.165806	-1.09912		0.53962	0.532542	-0.862476
SUPT16H	Q9Y5B9;G3V5A4;G3V401;G3V2X0	Q9Y5B9	FACT complex subunit SPT16	16	16	15.9	15.9	119.91	0	50.388	2917100000	93	2.96924	2.24942	ctrl_spe	0.644471	0.385458	-0.764963		2.70784	0.109385	-1.65276	down1	0.266473	0.608959	0.55309		1.09693	0.106242	0.89668		0.180116	0.811015	0.266073
SRP72	O76094;D6RDY6;R4GNC1	O76094	Signal recognition particle subunit SRP72	14	14	22.5	22.5	74.605	0	80.785	1984900000	95	2.54279	1.74705	ctrl_spe	1.21293	0.0515317	1.41336		1.88992	0.221477	-1.25513	down1	0.364351	0.498568	0.558445		0.523535	0.457315	-1.20618		1.42375	0.210968	-1.68165
HIST2H3PS2	Q5TEC6;A0A590UJL8	Q5TEC6	Histone H3	1	1	8.1	8.1	15.43	0	2.9453	10699000000	49	2.17875	3.3996	ctrl_spe	0.270437	0.586459	1.18909		1.60468	0.24888	-3.01993	down1	0.125698	0.810671	-0.411778		0.18157	0.700459	-0.733434		0.0814922	0.901638	0.269039
MRPL37	Q9BZE1;S4R369;A6NHR2;H0Y4J2	Q9BZE1;S4R369	39S ribosomal protein L37, mitochondrial	18	18	43.3	43.3	48.117	0	51.255	1982800000	124	5.00365	3.08625	ctrl_spe	1.07388	0.0766651	2.96549		0.719203	0.522498	-1.16521		0.400924	0.462641	-0.712319		0.619831	0.39395	-0.69145		0.0776031	0.905516	0.124768
MRPS18B	Q9Y676;A0A0G2JIC6	Q9Y676;A0A0G2JIC6	28S ribosomal protein S18b, mitochondrial	13	13	49.2	49.2	29.395	0	72.274	2870700000	94	7.72279	3.03573	ctrl_spe	0.754355	0.279437	1.97122		1.04339	0.385064	-1.31835		0.346268	0.518879	-0.756079		0.58021	0.423934	-1.61132		0.440755	0.587178	-0.909343
MRPS6	P82932	P82932	28S ribosomal protein S6, mitochondrial	6	6	40.8	40.8	14.226	0	9.2314	1323900000	61	3.99733	2.31174	ctrl_spe	0.674893	0.361777	2.00658		0.619447	0.568023	-0.962385		0.525542	0.334939	-0.852293		1.46253	0.0484533	-1.61982		0.54719	0.527548	-0.676398
RALYL	B3KT61;Q86SE5;E5RG71;E5RIX9;E5RJ39	B3KT61;Q86SE5;E5RG71	RNA-binding Raly-like protein	7	7	28.2	28.2	31.074	0	20.402	658910000	43	1.99438	1.94164	ctrl_spe	0.908508	0.139112	2.1271		0.166259	0.863488	0.328066		NaN	1	0		NaN	1	0		NaN	1	0
MRPS27	G5EA06;Q92552;D6RH20;D6RJC7;E5RJ73	G5EA06;Q92552;D6RH20;D6RJC7	28S ribosomal protein S27, mitochondrial	11	11	24.6	24.6	41.329	0	47.555	853010000	87	4.34681	1.93509	ctrl_spe	0.521934	0.464854	1.36831		0.486926	0.646136	-0.705764		0.496992	0.364931	-0.878232		0.396345	0.538111	-0.520152		0.199911	0.80804	-0.320059
ELAVL2	A0A0A0MRX1;Q12926;B1AM48;C9JB16	A0A0A0MRX1;Q12926;B1AM48	ELAV-like protein;ELAV-like protein 2	6	6	20.8	20.8	42.632	0	117.11	1413300000	47	1.46309	1.86722	ctrl_spe	1.18613	0.0546053	1.06946		1.06057	0.374985	-1.06469		1.09487	0.0973059	-0.972677		0.999633	0.130408	-1.1808		0.197427	0.805679	-0.226217
PCBP1	Q15365	Q15365	Poly(rC)-binding protein 1	8	5	30.3	20.2	37.497	0	87.819	3549700000	146	1.9245	1.77555	ctrl_spe	4.99951	0.00106832	-1.65437		3.18666	0.0746667	-0.522266	down0.5	1.03126	0.113015	-0.868354		0.208932	0.677835	0.231676		0.511033	0.542479	0.328698
KHDRBS3	O75525;E5RJZ9;E5RG12;H0YAQ1;H0YAQ3;E5RHD3	O75525;E5RJZ9;E5RG12;H0YAQ1;H0YAQ3	KH domain-containing, RNA-binding, signal transduction-associated protein 3	8	8	30.9	30.9	38.799	0	28.811	1826900000	56	2.27684	1.7333	ctrl_spe	0.231045	0.611627	0.516019		1.48031	0.277983	-1.38696	down1	0.976215	0.126087	-1.30306		0.505204	0.466079	-0.969448		0.865782	0.375525	1.09724
MRPL57	Q9BQC6	Q9BQC6	Ribosomal protein 63, mitochondrial	4	4	31.4	31.4	12.266	0	17.077	2008500000	59	2.29964	1.70962	ctrl_spe	0.737689	0.29767	1.14457		1.38412	0.285363	-1.19918	down1	0.0190829	0.962626	-0.0294361		1.61726	0.037	-1.45088		2.79835	0.0355122	-1.75093
ZCCHC3	Q9NUD5	Q9NUD5	Zinc finger CCHC domain-containing protein 3	15	15	44.2	44.2	43.547	0	95.407	2501100000	99	1.39159	1.54413	ctrl_spe	0.957068	0.116556	1.06265		0.358966	0.722475	0.438621		0.0207308	0.960674	0.0442552		0.309246	0.595926	0.632693		0.377552	0.633805	0.568644
SLC25A4	P12235;V9GYG0	P12235;V9GYG0	ADP/ATP translocase 1	3	3	9.1	9.1	33.064	0	5.0283	437440000	35	2.12666	1.44782	ctrl_spe	0.873198	0.161862	0.659016		1.80745	0.222474	-0.86322	down0.5	NaN	1	0		NaN	1	0		NaN	1	0
RPSA	C9J9K3;A0A0C4DG17;P08865;F8WD59	C9J9K3;A0A0C4DG17;P08865;F8WD59	40S ribosomal protein SA	6	6	31.2	31.2	29.404	0	33.284	749330000	49	5.79703	1.43987	ctrl_spe	NaN	1	0		3.34535	0.0684444	-1.35904	down1	NaN	1	0		NaN	1	0		NaN	1	0
SNRPB;SNRPN	P14678;J3QLE5;P63162;J3KRY3;S4R3P3	P14678;J3QLE5;P63162	Small nuclear ribonucleoprotein-associated proteins B and B;Small nuclear ribonucleoprotein-associated protein N	6	6	24.2	24.2	24.61	0	15.877	629570000	51	1.36022	1.32572	ctrl_spe	0.253666	0.59671	0.621617		0.41214	0.68623	-0.583379		0.44007	0.425051	-0.626678		NaN	1	0		0.965823	0.343089	-0.794551
WBP11	Q9Y2W2;F5H5G4;F5GXS9	Q9Y2W2;F5H5G4	WW domain-binding protein 11	8	8	13.7	13.7	69.997	0	26.207	2059600000	61	1.90275	1.27728	ctrl_spe	0.667082	0.368899	1.16543		0.0385145	0.962098	-0.0551364		0.238318	0.644218	-0.500133		0.106332	0.792321	-0.332736		0.109535	0.878408	-0.247798
CCAR2	Q8N163;G3V119;H0YB24;H0YC69;E5RFJ3;H0YC58;E5RGU7;E5RHJ4	Q8N163;G3V119;H0YB24	Cell cycle and apoptosis regulator protein 2	10	10	13.4	13.4	102.9	0	29.234	829130000	64	2.07901	1.20368	ctrl_spe	NaN	1	0		2.90722	0.105882	-1.7005	down1	0.527016	0.334365	-0.412861		1.135	0.0975385	-1.15886		2.40141	0.0699231	-1.23418
PPAN-P2RY11;PPAN	A0A0A6YYI3;A0A0B4J1V8;Q9NQ55;A8MV53;H7C446;C9JHF7;C9J3W3	A0A0A6YYI3;A0A0B4J1V8;Q9NQ55;A8MV53	Suppressor of SWI4 1 homolog	7	7	12.9	12.9	58.199	0	18.956	1681700000	52	1.578	1.1819	ctrl_spe	0.563766	0.439139	0.821726		0.399806	0.693002	-0.404299		0.112496	0.827049	-0.160148		0.539583	0.445694	-1.33367		0.969449	0.344297	-1.25622
SENP3;SENP3-EIF4A1	Q9H4L4;A0A087X0R7;J3QRE4;A0A087WV50;J3QL36;J3KSF5	Q9H4L4;A0A087X0R7;J3QRE4;A0A087WV50;J3QL36	Sentrin-specific protease 3	6	6	12	12	65.009	0	27.492	303520000	28	2.18857	1.15088	ctrl_spe	0.0820636	0.772333	0.173872		0.924423	0.430565	-0.738504		NaN	1	0		NaN	1	0		NaN	1	0
TRIP12	Q14669;H7C2Y1	Q14669	E3 ubiquitin-protein ligase TRIP12	19	14	11.4	8.7	220.43	0	143.1	1185900000	97	1.68628	1.09656	ctrl_spe	NaN	1	0		1.75372	0.225831	-0.896102	down0.5	0.709884	0.21159	-0.328629		0.565225	0.431202	-0.298729		1.00941	0.330738	0.254131
CAMKV	Q8NCB2;B4DM24;E7ETR1;C9J9E2;C9JSB2;F8WDJ4;B4DSW8	Q8NCB2;B4DM24;E7ETR1;C9J9E2	CaM kinase-like vesicle-associated protein	6	6	16.4	16.4	54.353	0	30.341	325160000	29	1.39877	1.09055	ctrl_spe	NaN	1	0		1.35418	0.291429	-0.939576	down0.5	NaN	1	0		NaN	1	0		NaN	1	0
ZNF574	A0A0C4DFM2;Q6ZN55	A0A0C4DFM2;Q6ZN55	Zinc finger protein 574	11	11	12.9	12.9	108.7	0	94.102	721670000	47	1.37223	1.06212	ctrl_spe	0.129564	0.7009	0.181603		0.786124	0.499957	-0.633302		NaN	1	0		0.70185	0.332327	-1.38655		0.0727787	0.912506	0.121881
RRP1	P56182;D6RE82	P56182	Ribosomal RNA processing protein 1 homolog A	9	9	21.7	21.7	52.839	0	33.368	2864800000	78	1.38197	1.03179	ctrl_spe	0.15281	0.67778	0.296461		0.990453	0.402716	-0.67903		0.55816	0.304178	0.301114		1.85649	0.0245751	0.845161		0.172478	0.817047	0.0757669
PTBP1	P26599;A6NLN1;A0A0U1RRM4;A0A0D9SF20;K7EKJ7;A0A087WUW5;K7ES59;A0A087WU68;K7EK45;K7ELW5	P26599;A6NLN1;A0A0U1RRM4;A0A0D9SF20	Polypyrimidine tract-binding protein 1	13	12	22.6	22.6	57.221	0	96.668	9817900000	132	0.760313	1.55763		1.19244	0.0540341	1.19723		0.011695	0.990636	0.0258378		2.5928	0.00587907	2.09535	ctrl_spe	0.917943	0.165901	1.83595		0.612523	0.48561	-0.810062
FBLL1	A6NHQ2	A6NHQ2	rRNA/tRNA 2-O-methyltransferase fibrillarin-like protein 1	13	13	46.1	46.1	34.803	0	102.43	6831100000	80	0.990198	1.5226		0.848943	0.180346	1.98399		0.619097	0.566734	-1.06125		4.38352	0.000556522	1.64909	ctrl_spe	0.0248907	0.943795	-0.102199		1.19644	0.275897	-1.59304
NONO	Q15233;H7C367;C9JYS8;C9IZL7;C9J4X2	Q15233;H7C367	Non-POU domain-containing octamer-binding protein	19	19	45.6	45.6	54.231	0	177.31	8882900000	202	0.764656	-0.392363		0.487114	0.479945	0.223461		0.0353633	0.96733	-0.0203682		3.69679	0.00137838	2.92274	ctrl_spe	0.0400356	0.910154	-0.12771		1.77255	0.14037	-1.60519	down1
RBM34	P42696;A2A2V2;Q5TCT4;H7C5M1	P42696;A2A2V2	RNA-binding protein 34	14	14	36.5	36.5	48.564	0	42.892	15975000000	56	0.466232	1.47965		NaN	1	0		0.70521	0.526684	-1.40228		3.97533	0.001	3.47998	ctrl_spe	0.0184944	0.959796	0.102497		2.39568	0.0695849	-3.7518	down1
MRPL11	Q9Y3B7;E9PQB6;H0YCD5	Q9Y3B7	39S ribosomal protein L11, mitochondrial	13	13	64.6	64.6	20.683	0	70.386	5770800000	138	0.42484	0.893662		0.0465967	0.854597	0.16483		0.0901241	0.908195	-0.227544		4.29497	0.000605042	2.28937	ctrl_spe	0.929118	0.1614	1.03508		1.23321	0.269065	-0.74963
RPL37	P61927;D6RG19;D6R9X9	P61927;D6RG19	60S ribosomal protein L37;Ribosomal protein L37	6	6	41.2	41.2	11.078	0	9.4274	12096000000	41	NaN	0		NaN	1	0		NaN	1	0		1.63046	0.0297703	3.27164	ctrl_spe	0.0635752	0.862057	-0.303679		1.86803	0.127625	-3.58139	down1
GTF2I	P78347;A0A494C1K3;A0A494C0Q7;C9J6M0	P78347;A0A494C1K3	General transcription factor II-I	25	25	25.2	25.2	112.42	0	66.729	4284700000	190	0.758812	-0.601323		1.35048	0.0368317	-1.29936		1.006	0.399925	-0.710637		1.43846	0.0450864	1.44823	ctrl_spe	0.577659	0.425355	0.793276		0.416064	0.602581	0.388496
RPS27	P42677	P42677	40S ribosomal protein S27	4	2	40.5	15.5	9.461	0	15.612	5926600000	69	0.636182	-1.24643		0.582389	0.428414	1.27624		0.610079	0.571307	1.01915		5.31874	0.000505263	2.07314	ctrl_spe	0.494787	0.472489	-1.32291		3.11119	0.0249655	-2.95391	down1
SPATS2L	Q9NUQ6;B8ZZZ7;F8VT91;F8W6C2;C9JKE4;F8VZ02;C9JGM8;F2Z2S1;C9JW67;Q4ZFW0;F8WAV0;C9IZC3;C9J8M7	Q9NUQ6;B8ZZZ7	SPATS2-like protein	15	15	29.4	29.4	61.728	0	46.052	3838100000	86	0.240922	-0.393042		0.662308	0.372268	0.866748		0.751322	0.512	0.813406		1.52919	0.0366134	1.9832	ctrl_spe	0.546089	0.44278	-1.12342		2.24026	0.0795	-2.45042	down1
RPS26;RPS26P11	P62854;Q5JNZ5	P62854;Q5JNZ5	40S ribosomal protein S26;Putative 40S ribosomal protein S26-like 1	3	3	27	27	13.015	0	35.669	29469000000	49	0.13435	0.521804		0.77081	0.263098	3.00064		0.858809	0.468841	2.32596		3.91409	0.00113433	3.99693	ctrl_spe	0.109307	0.789005	0.658442		2.1276	0.0845128	-4.11476	down1
WIBG	Q9BRP8	Q9BRP8	Partner of Y14 and mago	17	17	77	77	22.655	0	323.31	23644000000	173	0.835796	2.14646		1.02898	0.0885327	2.36432		0.156126	0.864143	0.457189		0.523611	0.336499	1.76785		0.677575	0.351363	2.09412		0.0591406	0.929191	0.227538
PRDX2	P32119;A6NIW5	P32119;A6NIW5	Peroxiredoxin-2	11	11	32.3	32.3	21.892	0	26.094	3351900000	153	0.276636	-0.290396		0.924235	0.130609	1.30271		1.21836	0.330086	-0.63621		0.0768532	0.88	0.275468		2.162	0.0158007	0.774978		0.360222	0.653996	0.719003
PRRC2C	E7EPN9;Q9Y520;H7C5N8;A0A0A0MS30;A0A2R8Y7F4;A0A2R8YET2	E7EPN9;Q9Y520	Protein PRRC2C	22	21	8.8	8.5	308.77	0	43.001	2239700000	91	0.178594	0.320034		1.12392	0.0653971	2.00402		0.554876	0.610536	0.80777		0.236266	0.64662	-0.514748		1.69217	0.0321216	0.841523		1.41635	0.213103	1.46857	up1
G3BP2	Q9UN86;D6RGJ4;D6RAC7;D6RB17;D6RBM9;D6REX8;D6RBR0;D6RE13;D6RBW8;D6R9X5;D6R9A4	Q9UN86;D6RGJ4;D6RAC7;D6RB17	Ras GTPase-activating protein-binding protein 2	13	11	28.8	26.1	54.12	0	138.73	12305000000	135	1.20775	2.20067		1.10632	0.0689451	2.73901		0.0132161	0.993005	0.0368675		1.07734	0.101089	2.11503		0.300655	0.600132	1.07427		0.270904	0.737482	-0.712184
GATAD2B	A0A0U1RRM1;Q8WXI9;A0A0U1RR30;A0A1B0GW07	A0A0U1RRM1;Q8WXI9;A0A0U1RR30	Transcriptional repressor p66-beta	7	5	18	13.9	63.461	0	38.644	699970000	28	1.97063	0.962686		0.0987247	0.743473	0.168158		0.249081	0.799399	-0.192657		NaN	1	0		NaN	1	0		NaN	1	0
SMCHD1	A6NHR9;J3KTL8;A0A2R8YCU7	A6NHR9;J3KTL8	Structural maintenance of chromosomes flexible hinge domain-containing protein 1	7	7	5	5	226.37	0	22.138	372010000	33	1.35275	0.899303		NaN	1	0		1.59598	0.250812	-0.74822	down0.5	3.48785	0.00176687	-1.78445		1.26388	0.074134	-1.37241		0.204258	0.804651	-0.17306
TARDBP;TDP43	Q13148;K7EJM5;A0A087WX29;A0A0A0N0M3;K7EN94;B1AKP7;G3V162;A0A087X260;A0A087WYY0;A0A087WXQ5;A0A087WV68;A0A087WW61;A0A087WX67;A0A087WXV3;A0A087WZC9	Q13148;K7EJM5;A0A087WX29;A0A0A0N0M3;K7EN94;B1AKP7;G3V162;A0A087X260;A0A087WYY0;A0A087WXQ5;A0A087WV68	TAR DNA-binding protein 43	6	6	14.5	14.5	44.739	0	113.15	2594500000	78	1.56207	0.616919		0.942187	0.123889	1.58966		0.766007	0.511565	-0.725977		0.247125	0.632071	-0.566302		2.34147	0.0115455	-2.90517		1.56187	0.1738	-1.80807
AHDC1	Q5TGY3	Q5TGY3	AT-hook DNA-binding motif-containing protein 1	8	8	7.3	7.3	168.35	0	80.549	313670000	34	1.3595	0.45367		NaN	1	0		1.12522	0.354119	-0.824228		NaN	1	0		NaN	1	0		NaN	1	0
LRRC47	Q8N1G4	Q8N1G4	Leucine-rich repeat-containing protein 47	9	9	19.2	19.2	63.472	0	44.111	1029700000	62	NaN	0		NaN	1	0		NaN	1	0		2.01196	0.0140545	0.749746		1.89298	0.0236078	-1.97228		3.21424	0.0216923	-1.58529	down1
IQGAP1	H0YLE8;P46940;A0A0J9YXZ5	H0YLE8;P46940	Ras GTPase-activating-like protein IQGAP1	10	10	9.1	9.1	124.79	0	43.296	1935000000	52	NaN	0		NaN	1	0		NaN	1	0		1.79035	0.020539	0.734704		0.93544	0.157967	0.387504		0.589284	0.502369	-0.208044
MORF4L2	Q5JXX1;Q5JXX2;Q15014;A0A0A0MT59;Q5JXX6	Q5JXX1;Q5JXX2;Q15014;A0A0A0MT59	Mortality factor 4-like protein 2	3	3	20.3	20.3	17.617	0	4.8697	514460000	8	NaN	0		NaN	1	0		NaN	1	0		NaN	1	0		0.196182	0.688201	0.41241		2.00995	0.0955604	1.35618
SMC3	Q9UQE7	Q9UQE7	Structural maintenance of chromosomes protein 3	15	15	14.1	14.1	141.54	0	32.511	670510000	45	NaN	0		NaN	1	0		NaN	1	0		2.16029	0.0112531	-1.87124		1.28281	0.0700753	-0.33839		2.3928	0.0685185	1.31208
PRPF40A	O75400;F5H578;H0YG38	O75400	Pre-mRNA-processing factor 40 homolog A	10	10	12	12	108.8	0	17.161	580540000	42	NaN	0		NaN	1	0		NaN	1	0		3.44939	0.00193939	-2.27485		4.71124	0.000252252	-1.96138		4.00378	0.00977778	1.27476
SERPINH1	P50454;E9PKH2;H0YEP8;E9PQ34;E9PJH8;E9PIG2;E9PRS3;E9PNX1;E9PK86;E9PMI5;E9PR70;E9PPV6	P50454;E9PKH2	Serpin H1	3	3	9.1	9.1	46.44	0	12.262	575930000	29	NaN	0		NaN	1	0		NaN	1	0		1.60101	0.0322676	-1.73473		2.03292	0.0182508	-0.645735		1.75861	0.141117	1.23585
CAT	P04040	P04040	Catalase	2	2	7	7	59.755	0	4.059	5956600	6	NaN	0		5.27356	0.000732394	-2.1716		NaN	1	0		NaN	1	0		NaN	1	0		NaN	1	0
GAR1	Q9NY12	Q9NY12	H/ACA ribonucleoprotein complex subunit 1	3	3	10.6	10.6	22.348	0	3.898	477110000	20	NaN	0		1.09716	0.070381	1.58198		1.21741	0.32861	1.2633		NaN	1	0		NaN	1	0		NaN	1	0
FSCN1	Q16658;C9JFC0;A0A0A0MSB2	Q16658	Fascin	6	6	13.6	13.6	54.529	0	8.3421	135150000	29	NaN	0		0.886467	0.153268	1.5246		0.747102	0.514847	0.994265		NaN	1	0		NaN	1	0		NaN	1	0
PPIG	Q13427;E9PG73;C9JN15;C9JM79	Q13427;E9PG73	Peptidyl-prolyl cis-trans isomerase G	6	6	7.6	7.6	88.616	0	9.2297	155330000	14	NaN	0		0.271251	0.587131	0.85418		0.741254	0.518101	1.21134		NaN	1	0		NaN	1	0		NaN	1	0
TRIM2	Q9C040;A0A0J9YX34	Q9C040;A0A0J9YX34	Tripartite motif-containing protein 2	6	6	9.1	9.1	81.529	0	12.208	69720000	14	NaN	0		0.280375	0.582563	0.348578		0.682477	0.531246	0.86848		NaN	1	0		NaN	1	0		NaN	1	0
SF3A3	Q12874	Q12874	Splicing factor 3A subunit 3	4	4	10	10	58.848	0	13.201	170980000	28	NaN	0		0.541044	0.45404	-0.696065		0.527718	0.623223	-0.556119		NaN	1	0		NaN	1	0		NaN	1	0
ATP6V1A	P38606;C9JVW8;C9JA17;F8WDJ3	P38606;C9JVW8	V-type proton ATPase catalytic subunit A	7	7	13	13	68.303	0	14.648	93790000	28	NaN	0		3.19939	0.00325614	-1.48369		0.300025	0.751985	0.334114		NaN	1	0		NaN	1	0		NaN	1	0
NPEPPS	E9PLK3;P55786;H0YDG0;H0YCQ5;E9PP11;A6NEC2	E9PLK3;P55786	Puromycin-sensitive aminopeptidase	8	8	10.2	10.2	102.99	0	16.085	69305000	33	NaN	0		0.163423	0.669215	-0.168792		0.170692	0.863785	0.223805		NaN	1	0		NaN	1	0		NaN	1	0
CRIP2	P52943;H0YFA4;H0YHD8	P52943;H0YFA4	Cysteine-rich protein 2	5	5	38	38	22.492	0	120.25	564370000	39	NaN	0		2.84761	0.00484615	-3.72263		0.00633727	0.991376	-0.00993019		NaN	1	0		NaN	1	0		NaN	1	0
HIST1H1T	P22492	P22492	Histone H1t	4	4	18.8	18.8	22.019	0	6.774	158720000	14	NaN	0		0.193358	0.64056	0.167932		0.00480942	0.991984	0.00581455		NaN	1	0		NaN	1	0		NaN	1	0
HSD17B4	A0A2R8YD50;P51659;A0A2R8YEG2;A0A2R8YDT8;A0A2R8YF45;E7EPL9;E7ER27;A0A2R8Y7L2;E7ET17	A0A2R8YD50;P51659;A0A2R8YEG2;A0A2R8YDT8;A0A2R8YF45;E7EPL9;E7ER27;A0A2R8Y7L2;E7ET17	Peroxisomal multifunctional enzyme type 2;(3R)-hydroxyacyl-CoA dehydrogenase;Enoyl-CoA hydratase 2	2	2	3.5	3.5	76.837	0	5.2609	10092000	6	NaN	0		NaN	1	0		NaN	1	0		3.08195	0.00271579	-1.87317		NaN	1	0		NaN	1	0
CPS1	P31327;A0A669KBF2;Q5R211	P31327	Carbamoyl-phosphate synthase [ammonia], mitochondrial	9	9	6.6	6.6	164.94	0	22.225	273350000	25	NaN	0		NaN	1	0		NaN	1	0		5.38367	0.000516129	-4.8706		NaN	1	0		NaN	1	0
TRAFD1	O14545;F8VNX8;F8VWK2;F8VVF3	O14545;F8VNX8	TRAF-type zinc finger domain-containing protein 1	3	3	5.5	5.5	64.84	0	6.1112	20714000	10	NaN	0		NaN	1	0		NaN	1	0		NaN	1	0		3.94451	0.00165789	-2.75344		NaN	1	0
DYNLRB1;DYNLRB2	Q9NP97;Q8TF09;H3BNG9;H3BPA0;Q7Z4M1;H3BQI1;B1AKR6	Q9NP97;Q8TF09;H3BNG9;H3BPA0;Q7Z4M1;H3BQI1;B1AKR6	Dynein light chain roadblock-type 1;Dynein light chain roadblock-type 2	2	2	21.9	21.9	10.921	0	7.9754	373220000	30	NaN	0		1.03461	0.0867887	-1.48418		NaN	1	0		NaN	1	0		5.35714	0	-4.391		NaN	1	0
TOP2A	P11388	P11388	DNA topoisomerase 2-alpha	7	7	5.2	5.2	174.38	0	18.349	270720000	21	NaN	0		NaN	1	0		NaN	1	0		2.88433	0.0038191	-1.48408		NaN	1	0		2.05201	0.0912093	-0.729371
ZC3H15	Q8WU90;F8WB26;H7C466;F8WF67	Q8WU90;F8WB26	Zinc finger CCCH domain-containing protein 15	5	5	13.6	13.6	48.602	0	10.797	445280000	32	NaN	0		NaN	1	0		NaN	1	0		1.2128	0.0768667	-0.505554		2.25749	0.013763	-1.64898		1.81386	0.132	-0.77667
AIMP1	Q12904;D6R937;A0A5F9ZHC5	Q12904;D6R937;A0A5F9ZHC5	Aminoacyl tRNA synthase complex-interacting multifunctional protein 1;Endothelial monocyte-activating polypeptide 2	2	2	7.1	7.1	34.352	0	7.8335	39484000	6	NaN	0		NaN	1	0		NaN	1	0		NaN	1	0		3.02938	0.00421053	-1.87255		1.61244	0.167908	-0.791962
NOP9	A0A3B3ISH6;Q86U38	A0A3B3ISH6;Q86U38	Nucleolar protein 9	3	3	7.7	7.7	49.714	0	8.0648	497960000	21	NaN	0		NaN	1	0		NaN	1	0		1.5143	0.0379236	-1.11663		2.31671	0.0121498	-2.58362		1.35496	0.222988	-0.996708
UTP20	O75691	O75691	Small subunit processome component 20 homolog	6	6	2.2	2.2	318.38	0	13.194	413370000	27	NaN	0		NaN	1	0		NaN	1	0		0.966175	0.128376	-0.661896		NaN	1	0		1.75383	0.141679	-1.00754
SLK	Q9H2G2;A0A5F9ZH68	Q9H2G2	STE20-like serine/threonine-protein kinase	10	10	8	8	142.69	0	19.389	570290000	32	NaN	0		NaN	1	0		NaN	1	0		1.36657	0.0537885	-0.672013		NaN	1	0		1.69514	0.146829	-1.02888
ZNF638	Q14966;A0A096LPB4;A0A096LPI0;A0A096LNR2;A0A096LNX0;A0A096LNQ0;C9JWN0	Q14966	Zinc finger protein 638	15	15	8.7	8.7	220.62	0	23.515	886040000	50	NaN	0		NaN	1	0		NaN	1	0		1.6357	0.0295458	-0.425885		0.839591	0.207386	-1.32054		1.51366	0.179653	-1.04064
KARS	Q15046;H3BRC9	Q15046;H3BRC9	Lysine--tRNA ligase	2	2	5	5	68.047	0	26.405	396460000	9	NaN	0		NaN	1	0		NaN	1	0		1.14988	0.0885946	-0.915916		3.05332	0.00427184	-2.70414		1.88757	0.123368	-1.07916
SMAD2	K7EJX0;B7Z5N5;Q15796;K7ESI8;K7EL92;K7ERC7;H0YMP2;H0YL71;H3BP09;H3BVD1;P84022;O15198	K7EJX0;B7Z5N5;Q15796;K7ESI8;K7EL92;K7ERC7	Mothers against decapentaplegic homolog;Mothers against decapentaplegic homolog 2	3	3	12	12	24.494	0	10.542	130740000	18	NaN	0		NaN	1	0		NaN	1	0		2.9284	0.00361616	-1.68297		3.21839	0.00330612	-2.83632		2.04832	0.0901818	-1.10294
SPATA5	Q8NB90	Q8NB90	Spermatogenesis-associated protein 5	6	5	8.7	7.4	97.903	0	12.929	544480000	32	NaN	0		NaN	1	0		NaN	1	0		1.28731	0.0651496	-0.877415		NaN	1	0		1.53025	0.179834	-1.17842
CENPV	Q7Z7K6	Q7Z7K6	Centromere protein V	5	3	28.4	18.9	29.946	0	46.484	432990000	19	NaN	0		NaN	1	0		NaN	1	0		2.8774	0.0038408	-1.28091		NaN	1	0		2.713	0.0418605	-1.2288
KIF21A	A0A1B0GV47;Q7Z4S6;H0YIM7;H0YHT2;H0YIM6;Q2M1P5;Q86VH2	A0A1B0GV47;Q7Z4S6;H0YIM7	Kinesin-like protein KIF21A;Kinesin-like protein	9	6	5.9	3.9	184.71	0	38.568	575720000	27	NaN	0		NaN	1	0		NaN	1	0		1.00637	0.117842	-0.83213		NaN	1	0		2.09258	0.0881481	-1.2537
NEMF	O60524;G3V5V3;G3V4D9	O60524;G3V5V3	Nuclear export mediator factor NEMF	8	8	8.9	8.9	122.95	0	30.57	1519800000	57	NaN	0		NaN	1	0		NaN	1	0		0.0574609	0.911424	-0.0521274		1.23414	0.0791323	-0.774209		3.93642	0.0112	-1.27342
HADHB	P55084;B5MD38;F5GZQ3;C9JEY0;C9JE81;C9K0M0	P55084;B5MD38;F5GZQ3	Trifunctional enzyme subunit beta, mitochondrial;3-ketoacyl-CoA thiolase	8	8	17.5	17.5	51.294	0	17.596	550850000	29	NaN	0		NaN	1	0		NaN	1	0		0.646828	0.242744	-0.767235		NaN	1	0		1.36894	0.220407	-1.30588
RFC2	P35250;H7C5S7;H7C5P1;H7C5Q7;F8WC37;H7C5A0;H7C5G4;H7C5P4;A0A087WVY3	P35250	Replication factor C subunit 2	3	3	11	11	39.157	0	11.876	374710000	12	NaN	0		NaN	1	0		NaN	1	0		1.38647	0.0515854	-0.943144		NaN	1	0		2.10222	0.0871	-1.45587
PDCD6IP	Q8WUM4;F8WDK9;A0A3B3IT07	Q8WUM4	Programmed cell death 6-interacting protein	6	6	7.8	7.8	96.022	0	19.085	161370000	20	NaN	0		NaN	1	0		NaN	1	0		0.933084	0.136501	-1.09432		NaN	1	0		2.10241	0.0882025	-1.4885
PGD	K7EMN2;K7EM49;K7EPF6;P52209	K7EMN2;K7EM49;K7EPF6;P52209	6-phosphogluconate dehydrogenase, decarboxylating	5	5	31.9	31.9	17.293	0	6.2211	204050000	14	NaN	0		NaN	1	0		NaN	1	0		0.157326	0.763613	-0.377865		NaN	1	0		1.41518	0.212204	-1.53457
WDR46	O15213;H0Y6G3	O15213	WD repeat-containing protein 46	8	7	17.9	14.4	68.07	0	19.301	987550000	27	NaN	0		NaN	1	0		NaN	1	0		0.411778	0.451993	-0.386569		NaN	1	0		2.91107	0.0323429	-1.65503
FHL1	A0A0D9SFI6;A0A0D9SFB0;Q5JXH9;A0A0D9SFZ9;Q5JXH8;Q5JXH7;Q5JXI3;Q5JXI2;Q5JXI8;A0A494C0D6;Q13642;A0A0D9SGB2;Q5JXI0;A0A0D9SEY7;A0A494C0J3;A0A0D9SGD1	A0A0D9SFI6;A0A0D9SFB0;Q5JXH9;A0A0D9SFZ9;Q5JXH8;Q5JXH7;Q5JXI3;Q5JXI2;Q5JXI8;A0A494C0D6;Q13642;A0A0D9SGB2;Q5JXI0	Four and a half LIM domains protein 1	3	3	21.1	21.1	16.824	0	9.3865	637900000	33	NaN	0		NaN	1	0		NaN	1	0		0.191337	0.71287	-0.450982		NaN	1	0		1.45848	0.197882	-1.68654
RFC4	C9JZI1;P35249;C9JXZ7;C9JTT7;C9J8M3;C9JGY5;F8WE44;C9JW34	C9JZI1;P35249;C9JXZ7;C9JTT7;C9J8M3;C9JGY5;F8WE44	Replication factor C subunit 4	4	4	16.1	16.1	36.877	0	7.8901	104690000	24	NaN	0		NaN	1	0		NaN	1	0		NaN	1	0		4.26001	0.000914286	-3.05467		3.51426	0.0171765	-1.76107
LLPH	Q9BRT6	Q9BRT6	Protein LLP homolog	3	3	23.3	23.3	15.225	0	30.429	965530000	18	NaN	0		NaN	1	0		NaN	1	0		0.0610589	0.906736	-0.133696		NaN	1	0		2.14708	0.0827368	-1.77414
CLU	P10909;E5RJZ5;E7ERK6;E7ETB4;H0YLK8;E5RG36;E5RGB0;E5RH61;H0YAS8;H0YC35	P10909;E5RJZ5;E7ERK6;E7ETB4;H0YLK8;E5RG36;E5RGB0;E5RH61	Clusterin;Clusterin beta chain;Clusterin alpha chain	10	10	19.2	19.2	52.494	0	29.462	756890000	53	NaN	0		NaN	1	0		NaN	1	0		1.14165	0.0895508	-2.22374		5.56313	0	-3.46106		1.40498	0.214264	-1.77977
CNN3	Q15417;E9PDU6	Q15417;E9PDU6	Calponin-3;Calponin	6	6	27.7	27.7	36.413	0	32.007	485510000	23	NaN	0		NaN	1	0		NaN	1	0		0.231704	0.651485	-0.592844		NaN	1	0		1.82921	0.130291	-2.09064
RBM10	P98175	P98175	RNA-binding protein 10	8	6	8.9	6.9	103.53	0	13.458	837990000	26	NaN	0		NaN	1	0		NaN	1	0		0.701367	0.215303	-0.5149		NaN	1	0		5.47228	0.0016	-2.15279
ATAD3A	Q9NVI7;Q5SV16;Q5T2N8;A0A5K1VW56	Q9NVI7	ATPase family AAA domain-containing protein 3A	11	5	16.6	8.8	71.368	0	23.136	679880000	67	NaN	0		NaN	1	0		NaN	1	0		0.0574008	0.910213	0.0940113		1.86197	0.0243987	-2.21296		3.00548	0.0287273	-2.15589
LAMA1	P25391	P25391	Laminin subunit alpha-1	4	4	1.3	1.3	337.08	0	6.9493	772680000	33	NaN	0		NaN	1	0		NaN	1	0		0.214244	0.677801	-0.199994		NaN	1	0		3.52568	0.01775	-2.3748
	A0A1W2PPS1	A0A1W2PPS1		2	0	2.4	0	88.317	0	10.737	2726700000	31	NaN	0		NaN	1	0		NaN	1	0		0.392567	0.469445	1.013		NaN	1	0		2.18805	0.0845294	-2.69556
FLNA	P21333;A0A087WWY3;Q60FE5;F8WE98;H0Y5F3	P21333;A0A087WWY3;Q60FE5	Filamin-A	18	17	9.5	9.2	280.74	0	111.54	1529400000	73	NaN	0		NaN	1	0		NaN	1	0		0.599052	0.274115	-1.52457		4.66407	0.000247788	-4.73855		1.99266	0.0971613	-2.71931
DLD	E9PEX6;P09622;F8WDM5;A0A1W2PR83;F2Z2E3	E9PEX6;P09622	Dihydrolipoyl dehydrogenase;Dihydrolipoyl dehydrogenase, mitochondrial	6	6	13	13	51.815	0	12.156	252780000	20	NaN	0		NaN	1	0		NaN	1	0		0.696914	0.217149	-1.36652		NaN	1	0		1.25777	0.25659	-1.51816
ACTA1;ACTC1;ACTG2;ACTA2	P68133;P68032;P63267;P62736;A6NL76;C9JFL5;F6UVQ4;F6QUT6;F8WB63;B8ZZJ2	P68133;P68032;P63267;P62736;A6NL76;C9JFL5;F6UVQ4;F6QUT6	Actin, alpha skeletal muscle;Actin, alpha cardiac muscle 1;Actin, gamma-enteric smooth muscle;Actin, aortic smooth muscle	2	2	9	9	42.051	0	68.429	1258400000	29	NaN	0		NaN	1	0		NaN	1	0		0.450049	0.414958	-0.757339		2.61006	0.00844813	-2.78583		1.22658	0.270516	-1.13192
ZNF316	A6NFI3;C9JVC3;A0A494C0W3;Q8N9L1;Q14872;Q9BY31	A6NFI3	Zinc finger protein 316	10	9	11.3	10.4	108.44	0	21.388	444580000	26	NaN	0		NaN	1	0		NaN	1	0		NaN	1	0		0.694392	0.33865	-0.57319		1.21423	0.271853	0.775448
HADHA	H0YFD6;P40939;A0A2R8Y4F5;A0A2R8YG21;A0A2R8Y688	H0YFD6;P40939;A0A2R8Y4F5	Trifunctional enzyme subunit alpha, mitochondrial;Long-chain enoyl-CoA hydratase;Long chain 3-hydroxyacyl-CoA dehydrogenase	10	10	15.2	15.2	86.371	0	59.786	1192700000	63	NaN	0		NaN	1	0		NaN	1	0		0.109807	0.830341	0.1896		2.46486	0.0103373	-1.53794		1.20705	0.273792	-0.918499
IARS	J3KR24;A0A0A0MSX9;P41252	J3KR24;A0A0A0MSX9;P41252	Isoleucine--tRNA ligase, cytoplasmic	7	7	6.8	6.8	131.76	0	14.868	453870000	34	NaN	0		NaN	1	0		NaN	1	0		NaN	1	0		3.06086	0.00419512	-1.96897		1.1681	0.287698	0.860388
PRPF6	O94906	O94906	Pre-mRNA-processing factor 6	12	12	13.3	13.3	106.92	0	37.579	1362300000	56	NaN	0		NaN	1	0		NaN	1	0		0.0736783	0.885107	-0.0607681		0.0749454	0.842469	-0.133266		1.15881	0.289248	-0.719783
DRG1	Q9Y295;H0YI06;F8WEE0	Q9Y295	Developmentally-regulated GTP-binding protein 1	6	6	21.8	21.8	40.542	0	16.12	872350000	23	NaN	0		NaN	1	0		NaN	1	0		0.312541	0.554707	-0.531457		0.878651	0.185515	-1.31861		1.15625	0.289537	-1.25748
DNTTIP2	Q5QJE6;J3KP30	Q5QJE6;J3KP30	Deoxynucleotidyltransferase terminal-interacting protein 2	4	4	9.7	9.7	84.468	0	6.2033	250950000	9	NaN	0		NaN	1	0		NaN	1	0		NaN	1	0		0.893524	0.178093	-0.898528		1.14938	0.292725	0.905391
ACP1	P24666;G5E9R5;F2Z2Q9;D3YTI2	P24666;G5E9R5	Low molecular weight phosphotyrosine protein phosphatase	3	3	24.1	24.1	18.042	0	13.268	537650000	37	NaN	0		NaN	1	0		NaN	1	0		1.83677	0.0188244	-1.83039		NaN	1	0		1.14369	0.293359	-0.892123
RARS	P54136;E5RH09;E5RJM9	P54136	Arginine--tRNA ligase, cytoplasmic	6	6	10	10	75.378	0	11.051	160390000	16	NaN	0		NaN	1	0		NaN	1	0		1.00826	0.11762	-1.42318		NaN	1	0		1.1396	0.293442	-1.20282
MEST	C9JWU9;C9JW74;Q5EB52;R4GN52	C9JWU9;C9JW74;Q5EB52;R4GN52	Mesoderm-specific transcript homolog protein	2	2	9.4	9.4	24.362	0	3.7363	313460000	18	NaN	0		NaN	1	0		NaN	1	0		3.37545	0.00220118	-1.48236		NaN	1	0		1.1059	0.298977	-0.597166
MTHFSD	H3BVG2;A0A087WX22	H3BVG2;A0A087WX22		2	1	16.1	6.2	12.455	0.0012129	2.331	242740000	8	NaN	0		NaN	1	0		NaN	1	0		NaN	1	0		0.915314	0.167286	-1.16496		1.10347	0.299055	0.902962
MYL12A;MYL12B;MYL9	J3QRS3;P19105;O14950;P24844;J3KTJ1	J3QRS3;P19105;O14950;P24844	Myosin regulatory light chain 12A;Myosin regulatory light chain 12B;Myosin regulatory light polypeptide 9	4	4	23.2	23.2	20.457	0	10.303	1055200000	43	NaN	0		NaN	1	0		NaN	1	0		0.530909	0.331495	-0.635163		1.51446	0.0435874	-1.41248		1.09176	0.303874	-0.893214
EXOSC3	Q9NQT5	Q9NQT5	Exosome complex component RRP40	5	5	26.9	26.9	29.572	0	10.832	902490000	27	NaN	0		NaN	1	0		NaN	1	0		0.471569	0.394861	-0.614247		1.41986	0.0529471	-2.00492		1.08573	0.306009	-1.08457
C9orf114	Q5T280;R4GNG4	Q5T280	Putative methyltransferase C9orf114	6	6	15.4	15.4	42.008	0	19.394	1239200000	27	NaN	0		NaN	1	0		NaN	1	0		1.14339	0.0892869	-1.46158		0.144149	0.748081	0.255125		1.06969	0.31292	1.14377
DDX1	A0A087X2G1;F1T0B3;Q92499	A0A087X2G1;F1T0B3;Q92499	ATP-dependent RNA helicase DDX1	6	6	10.9	10.9	73.975	0	34.778	498180000	32	NaN	0		NaN	1	0		NaN	1	0		0.430672	0.435783	-0.654567		3.0695	0.00421569	-2.12665		1.06834	0.312564	-0.956238
ZCCHC9	Q8N567	Q8N567	Zinc finger CCHC domain-containing protein 9	2	2	5.2	5.2	30.477	0	4.3417	295170000	17	NaN	0		NaN	1	0		NaN	1	0		2.4954	0.00671493	-1.93099		NaN	1	0		1.06254	0.313659	-0.888295
WDR3	Q9UNX4	Q9UNX4	WD repeat-containing protein 3	5	5	6.7	6.7	106.1	0	10.17	285450000	18	NaN	0		NaN	1	0		NaN	1	0		2.43286	0.00758929	-1.12394		2.80284	0.00649558	-2.40957		1.0607	0.313774	-0.493206
NOL6	A0A0A0MRW6;Q9H6R4	A0A0A0MRW6;Q9H6R4	Nucleolar protein 6	7	7	7.9	7.9	112.16	0	14.921	324270000	16	NaN	0		NaN	1	0		NaN	1	0		NaN	1	0		1.25605	0.0756257	-1.26998		1.05247	0.315399	0.83793
PRPF31	Q8WWY3;E7EVX8;E7EU94;E7ESX0;E7EN72	Q8WWY3;E7EVX8	U4/U6 small nuclear ribonucleoprotein Prp31	5	5	15.2	15.2	55.455	0	26.349	966270000	36	NaN	0		NaN	1	0		NaN	1	0		0.0527145	0.913752	-0.0548322		0.359307	0.567384	-0.661711		1.04737	0.31735	-0.815837
ATP2A2	P16615;H7C5W9;O14983	P16615;H7C5W9	Sarcoplasmic/endoplasmic reticulum calcium ATPase 2	6	6	6.3	6.3	114.76	0	15.918	535040000	42	NaN	0		0.134165	0.696254	-0.233421		0.272206	0.776291	0.323701		1.09796	0.0969716	-1.03359		2.21053	0.0148905	-2.34439		0.988141	0.336701	-0.862857
POLR2A	P24928	P24928	DNA-directed RNA polymerase II subunit RPB1	8	8	5	5	217.17	0	16.733	422730000	25	NaN	0		NaN	1	0		NaN	1	0		1.46678	0.04275	-1.43117		NaN	1	0		0.958686	0.344275	-0.820888
NELFE	A2ABK4;A0A0A0MT02;P18615;A0A0G2JI50;E9PD43;A0A0A0MSN9;E7ENC7;E7EWR7	A2ABK4;A0A0A0MT02;P18615;A0A0G2JI50;E9PD43;A0A0A0MSN9	Negative elongation factor E	6	6	54.7	54.7	17.291	0	18.93	347590000	15	NaN	0		NaN	1	0		NaN	1	0		1.56474	0.0347541	-1.35457		NaN	1	0		0.955734	0.344061	-0.775361
RALA	P11233;H7C3P7;C9JPE8;P11234;F8WEQ6;C9JYR1;C9J6B1;C9JQB3	P11233;H7C3P7	Ras-related protein Ral-A	6	6	37.9	37.9	23.567	0	74.47	277040000	45	NaN	0		NaN	1	0		NaN	1	0		1.73772	0.0229167	-1.96897		2.95377	0.0058216	-1.9031		0.953402	0.344694	-0.724295
BRD1	O95696;J3KQ61;A8WI62;A8WI61;H0Y7B4;F6XDC4;E9PSF3;E9PI60;Q9ULD4	O95696;J3KQ61	Bromodomain-containing protein 1	4	4	3.4	3.4	119.52	0	4.4943	187440000	17	NaN	0		NaN	1	0		NaN	1	0		1.73935	0.0229686	-1.5277		2.00738	0.0188725	-2.18944		0.893615	0.36783	-0.819183
DSP	P15924	P15924	Desmoplakin	38	38	13.2	13.2	331.77	0	72.744	1745400000	175	NaN	0		0.828311	0.198388	2.6607		1.58926	0.251961	2.47332		1.636	0.0296327	-4.46442		4.27874	0.000920863	-4.35207		0.888152	0.369811	-1.92119
UBA1	P22314;Q5JRR6;Q5JRS1;Q5JRS3;Q5JRS2;Q5JRR9;Q5JRS0	P22314	Ubiquitin-like modifier-activating enzyme 1	7	7	8.7	8.7	117.85	0	16.585	271290000	25	NaN	0		NaN	1	0		NaN	1	0		0.495985	0.365494	-1.00086		NaN	1	0		0.868488	0.378502	-1.08353
CCDC59	Q9P031;F8VNY5	Q9P031;F8VNY5	Thyroid transcription factor 1-associated protein 26	3	3	12	12	28.669	0	6.0295	436010000	13	NaN	0		NaN	1	0		NaN	1	0		NaN	1	0		0.663829	0.362461	-0.850444		0.867117	0.377024	0.852
SUCLA2	A0A2R8YDQ9;A0A2R8Y6Y7;Q9P2R7;Q5T9Q5;Q5T9Q8;A0A0U1RQL1;A0A0U1RRI1;A0A0U1RQF8;A0A2R8Y5P6;A0A2R8Y6E6	A0A2R8YDQ9;A0A2R8Y6Y7;Q9P2R7;Q5T9Q5;Q5T9Q8	Succinyl-CoA ligase [ADP-forming] subunit beta, mitochondrial	4	4	9.1	9.1	43.841	0	6.9755	199690000	21	NaN	0		NaN	1	0		NaN	1	0		1.2452	0.0724943	-2.01426		NaN	1	0		0.835955	0.38191	-1.00906
GSTP1	P09211;A8MX94;A0A2R8Y5E5;A0A087X243;A0A087X2E9	P09211;A8MX94	Glutathione S-transferase P	5	5	31.4	31.4	23.356	0	56.754	443450000	36	NaN	0		NaN	1	0		NaN	1	0		1.20358	0.0784022	-1.47741		NaN	1	0		0.81666	0.389502	-0.789942
LDHB	A0A5F9ZHM4;P07195;F5H793;C9J7H8;A8MW50;A0A3B3IS95	A0A5F9ZHM4;P07195;F5H793;C9J7H8;A8MW50;A0A3B3IS95	L-lactate dehydrogenase B chain;L-lactate dehydrogenase	5	5	17.3	17.3	37.294	0	14.99	390960000	25	NaN	0		NaN	1	0		NaN	1	0		0.302071	0.564259	-0.83527		3.24617	0.00325	-3.54611		0.796667	0.400174	-1.28278
ACAA2	P42765;A0A0B4J2A4;K7EME0;K7ER88;K7EJB1;K7EJ68	P42765;A0A0B4J2A4;K7EME0	3-ketoacyl-CoA thiolase, mitochondrial	9	9	27.5	27.5	41.924	0	74.313	837830000	60	NaN	0		NaN	1	0		NaN	1	0		2.35858	0.00826201	-2.39768		2.34481	0.0115894	-4.22299		0.783808	0.39715	-1.06377
EMD	P50402;Q5HY57	P50402;Q5HY57	Emerin	5	5	25.6	25.6	28.994	0	25.446	357800000	45	NaN	0		0.356151	0.54297	-0.697971		0.0888429	0.907988	-0.176573		1.20148	0.0786154	-1.68839		3.34848	0.00297326	-3.28346		0.782433	0.397206	-0.924286
DDX23	Q9BUQ8;F8VVA2;F8W1J5;H0YI52;H0YIL9	Q9BUQ8	Probable ATP-dependent RNA helicase DDX23	19	19	22	22	95.581	0	23.98	994200000	73	NaN	0		NaN	1	0		NaN	1	0		0.158618	0.762037	-0.117935		1.57941	0.0404118	-0.945727		0.780173	0.397964	-0.343639
SOX15;SOX14;SOX21;SOX2;SOX1;SOX3	O60248;O95416;Q9Y651;P48431;O00570;P41225	O60248;O95416;Q9Y651;P48431;O00570;P41225	Protein SOX-15;Transcription factor SOX-14;Transcription factor SOX-21;Transcription factor SOX-2;Transcription factor SOX-1;Transcription factor SOX-3	2	2	3.9	3.9	25.251	0	3.8966	155050000	9	NaN	0		NaN	1	0		NaN	1	0		2.11263	0.0116613	-1.75782		NaN	1	0		0.771751	0.402372	-0.566478
COPG1	Q9Y678	Q9Y678	Coatomer subunit gamma-1	4	4	5.3	5.3	97.717	0	5.2321	102560000	9	NaN	0		NaN	1	0		NaN	1	0		1.23683	0.0731977	-1.5715		NaN	1	0		0.767689	0.405247	-0.778225
CHMP4B	Q9H444;P59074	Q9H444	Charged multivesicular body protein 4b	6	6	23.7	23.7	24.95	0	25.694	471780000	33	NaN	0		NaN	1	0		NaN	1	0		NaN	1	0		0.402896	0.535992	-0.890904		0.737072	0.420137	0.995223
UTP3	Q9NQZ2	Q9NQZ2	Something about silencing protein 10	3	3	5.6	5.6	54.557	0	4.0533	1162300000	26	NaN	0		NaN	1	0		NaN	1	0		0.117854	0.820316	-0.112866		1.11169	0.102891	-1.39802		0.736607	0.419386	-0.609035
DARS	P14868;C9J7S3;C9JLC1;H7BZ35;C9JQM9;H7C278	P14868	Aspartate--tRNA ligase, cytoplasmic	7	7	13.8	13.8	57.136	0	10.937	403560000	24	NaN	0		NaN	1	0		NaN	1	0		0.427609	0.437914	-0.930066		NaN	1	0		0.726873	0.425194	-1.04331
CEBPZ	Q03701;C9J9W7	Q03701	CCAAT/enhancer-binding protein zeta	13	13	13.1	13.1	120.97	0	26.572	1385000000	63	NaN	0		NaN	1	0		NaN	1	0		0.450927	0.41481	-1.0566		0.400967	0.536108	0.365871		0.717786	0.428858	1.06375
LUC7L	Q9NQ29;A8MYV2;B8ZZ10;B8ZZ09;F8WBC1;F2Z322;B8ZZ08;B8ZZ12	Q9NQ29;A8MYV2;B8ZZ10	Putative RNA-binding protein Luc7-like 1	8	8	22.9	22.9	43.727	0	32.545	2017200000	55	NaN	0		NaN	1	0		NaN	1	0		0.386038	0.475583	-0.695078		0.0328389	0.92615	0.1085		0.709201	0.435091	1.10047
LAMB1	P07942;G3XAI2;E7EPA6	P07942;G3XAI2	Laminin subunit beta-1	6	6	4	4	198.04	0	15.654	471050000	34	NaN	0		NaN	1	0		NaN	1	0		0.739095	0.197042	-0.890052		2.01073	0.0188418	-2.30104		0.701338	0.439099	-0.723723
LCA5	Q86VQ0;S4R3K6	Q86VQ0;S4R3K6	Lebercilin	5	5	7.9	7.9	80.553	0	39.355	311190000	14	NaN	0		NaN	1	0		NaN	1	0		3.82801	0.00122857	-1.72025		2.04618	0.0180478	-0.99415		0.699834	0.439211	0.339203
CRABP1	P29762;B5MCB5;Q5SYZ4;P29373	P29762;B5MCB5	Cellular retinoic acid-binding protein 1	8	8	46.7	46.7	15.565	0	23.632	1399600000	48	NaN	0		NaN	1	0		NaN	1	0		0.63634	0.249283	-1.35087		1.88555	0.0239609	-3.09307		0.699474	0.438339	-1.20239
GTPBP1	O00178;B0QY59;F5H716	O00178	GTP-binding protein 1	8	8	15.4	15.4	72.453	0	19.185	1730200000	54	NaN	0		NaN	1	0		NaN	1	0		0.327917	0.539376	0.527324		0.308384	0.595838	-0.552651		0.678562	0.45037	-0.83263
DHX37	Q8IY37;F5H3Y4	Q8IY37;F5H3Y4	Probable ATP-dependent RNA helicase DHX37	11	11	11.2	11.2	129.54	0	27.419	699460000	32	NaN	0		NaN	1	0		NaN	1	0		0.944069	0.134478	-0.915035		0.378157	0.552581	-0.56577		0.674162	0.452341	0.643564
GRWD1	Q9BQ67;M0QX71	Q9BQ67;M0QX71	Glutamate-rich WD repeat-containing protein 1	5	5	11.2	11.2	49.419	0	8.1351	659650000	22	NaN	0		NaN	1	0		NaN	1	0		0.934455	0.136703	-1.13553		2.65465	0.00805	-1.8742		0.668097	0.45652	-0.644361
PDHB	P11177	P11177	Pyruvate dehydrogenase E1 component subunit beta, mitochondrial	3	3	10.9	10.9	39.233	0	6.9861	104980000	12	NaN	0		NaN	1	0		NaN	1	0		2.82274	0.004	-2.18126		NaN	1	0		0.659044	0.46043	-0.523719
JUP	P14923;C9J826;C9JK18;C9JKY1;C9JTX4;C9JPI2;K7ERP3;A0A2R8Y6G0	P14923	Junction plakoglobin	12	11	16.8	15.8	81.744	0	19.317	573420000	64	NaN	0		0.463442	0.492755	-0.923964		1.07885	0.369918	1.20215		1.56744	0.0345658	-3.06484		3.46114	0.00256983	-4.01472		0.655483	0.461567	-1.14162
DDX41	Q9UJV9;H0Y8L8;A0A499FJW5	Q9UJV9	Probable ATP-dependent RNA helicase DDX41	3	3	5.6	5.6	69.837	0	5.7856	342210000	21	NaN	0		NaN	1	0		NaN	1	0		NaN	1	0		0.637713	0.380493	-1.05266		0.654312	0.46149	0.453777
CHD7	Q9P2D1;H0YJG4;A0A2R8Y840;Q9HCK8	Q9P2D1	Chromodomain-helicase-DNA-binding protein 7	6	6	2.6	2.6	335.92	0	21.282	388020000	23	NaN	0		NaN	1	0		NaN	1	0		NaN	1	0		1.23803	0.0781326	-1.25724		0.63987	0.472848	0.622775
MSH6	A0A494C0M1;P52701;A0A087WWJ1;A0A087WYT6	A0A494C0M1;P52701;A0A087WWJ1	DNA mismatch repair protein Msh6	6	6	4.8	4.8	142.85	0	14.075	1069200000	37	NaN	0		NaN	1	0		NaN	1	0		0.392712	0.470042	-0.365756		0.429851	0.517095	-0.155784		0.631267	0.474555	-0.364332
RBM47	D6R9D6;A0AV96;D6RBS9;B7Z8Z7;D6REZ6;D6R9M7;D6RCT1;D6RBP6;D6RA49;D6RFL5;Q5T0W7;F8W9F8;Q8TBY0;Q9NQ94	D6R9D6;A0AV96;D6RBS9;B7Z8Z7;D6REZ6;D6R9M7	RNA-binding protein 47	6	6	19.1	19.1	43.987	0	25.75	901320000	22	NaN	0		NaN	1	0		NaN	1	0		0.251176	0.628271	-0.621994		NaN	1	0		0.625789	0.476616	-0.885733
POF1B	Q8WVV4	Q8WVV4	Protein POF1B	2	2	3.6	3.6	68.064	0	4.4035	67206000	10	NaN	0		NaN	1	0		NaN	1	0		3.16819	0.00259341	-2.08594		NaN	1	0		0.620196	0.480432	-0.500603
ATP5J2-PTCD1	C9JJT5;G3V325	C9JJT5;G3V325		4	2	63	18.5	5.9149	0	8.1506	340220000	38	NaN	0		NaN	1	0		NaN	1	0		2.66771	0.00502857	-3.05996		2.31602	0.0121045	-2.96431		0.571426	0.512867	-0.698101
POLR2B	C9J4M6;C9J2Y9;P30876	C9J4M6;C9J2Y9;P30876	DNA-directed RNA polymerase;DNA-directed RNA polymerase II subunit RPB2	7	7	8.8	8.8	121.37	0	18.503	494980000	22	NaN	0		NaN	1	0		NaN	1	0		0.68841	0.220682	-0.964527		1.30028	0.0676865	-1.34476		0.558583	0.515953	-0.631097
MYH9	P35579;Q5BKV1	P35579	Myosin-9	8	6	5.3	3.7	226.53	0	40.228	271400000	20	NaN	0		NaN	1	0		NaN	1	0		0.595166	0.275488	-1.44646		NaN	1	0		0.533706	0.534343	-0.98389
C19orf53	Q9UNZ5;K7ESE5;A0A0A0MQS3	Q9UNZ5;K7ESE5;A0A0A0MQS3	Leydig cell tumor 10 kDa protein homolog	5	5	36.4	36.4	10.576	0	9.3505	1922000000	35	NaN	0		0.275817	0.584273	-0.452163		0.166674	0.864106	-0.233305		0.805732	0.175127	-1.29312		0.108494	0.789607	0.293096		0.53324	0.533543	0.86725
TPM3	A0A087WWU8;D6R904;J3KN67;Q5VU61;A0A494C0P6;A0A2R2Y2Q3;K7ENT6;A0A2R8YHD2;A0A2R8YE05;A0A2R8YH90;P06753;A0A2R8YEU4;A0A494C0G0;A0A494BZZ2;P07951;P09493;Q5TCU3;A0A0S2Z4G6;A7XZE4;CON__Q3SX28;B7Z596;H7BYY1;H0YKJ4;H0YL80;H0YK48;Q6ZN40;H0YKX5;H0YKP3;F5H7S3;A0A5F9UN72	A0A087WWU8;D6R904;J3KN67		9	6	43.6	27.8	26.42	0	20.251	362720000	37	NaN	0		NaN	1	0		NaN	1	0		0.301808	0.563689	-0.628568		3.31728	0.00303158	-3.22339		0.529296	0.534174	-0.742879
RAI1	A0A1W2PQJ7;Q7Z5J4	A0A1W2PQJ7;Q7Z5J4	Retinoic acid-induced protein 1	4	4	3.2	3.2	183.94	0	14.493	468240000	22	NaN	0		NaN	1	0		NaN	1	0		0.925244	0.137621	-1.01633		2.88514	0.00610909	-1.89071		0.525976	0.535671	-0.431027
PSMC6	A0A087X2I1;P62333;H0YJX2;H0YJC0	A0A087X2I1;P62333	26S protease regulatory subunit 10B	3	3	8.7	8.7	45.796	0	6.9454	213840000	16	NaN	0		NaN	1	0		NaN	1	0		0.768855	0.186367	-1.0724		NaN	1	0		0.512786	0.541857	-0.585512
DCAKD	K7ESP4;Q8WVC6	K7ESP4;Q8WVC6	Dephospho-CoA kinase domain-containing protein	2	2	11	11	24.177	0	4.7113	267870000	20	NaN	0		NaN	1	0		NaN	1	0		2.0762	0.0121429	-1.55559		NaN	1	0		0.506777	0.543938	-0.416058
RNH1	E9PMJ3;E9PLZ3;E9PIM9;P13489;E9PMA9;E9PMN0;E9PIK5	E9PMJ3;E9PLZ3;E9PIM9;P13489;E9PMA9;E9PMN0;E9PIK5	Ribonuclease inhibitor	2	2	13.8	13.8	20.475	0	20.022	239900000	9	NaN	0		NaN	1	0		NaN	1	0		0.459419	0.407346	-0.94841		NaN	1	0		0.5057	0.544062	-0.855181
NOLC1	Q14978;A0A0A0MRM9;S4R349	Q14978;A0A0A0MRM9	Nucleolar and coiled-body phosphoprotein 1	6	6	7.4	7.4	73.602	0	8.7823	604460000	28	NaN	0		NaN	1	0		NaN	1	0		2.59905	0.00571963	-1.18315		1.11002	0.10335	-1.19146		0.504892	0.543805	-0.368795
WDR1	O75083;D6RD66	O75083;D6RD66	WD repeat-containing protein 1	5	5	8.4	8.4	66.193	0	22.659	317480000	15	NaN	0		NaN	1	0		NaN	1	0		0.751239	0.19335	-1.74767		NaN	1	0		0.489217	0.556314	-0.844692
NSF	I3L0N3;P46459;I3L2G1;K7EQD6	I3L0N3;P46459	Vesicle-fusing ATPase	7	7	10.6	10.6	82.091	0	17.717	184260000	33	NaN	0		3.16944	0.00362369	-2.57708		NaN	1	0		1.03973	0.110579	-1.48605		2.75752	0.0072931	-2.29633		0.488922	0.555407	-0.591983
SLC2A1	P11166	P11166	Solute carrier family 2, facilitated glucose transporter member 1	3	3	10.4	10.4	54.083	0	32.454	823670000	28	NaN	0		NaN	1	0		NaN	1	0		1.2178	0.0765378	-1.65737		2.07338	0.0172595	-3.486		0.480726	0.558966	-0.701858
ALDH1A3	H0Y2X5;P47895;H0YMG7;O94788	H0Y2X5;P47895	Aldehyde dehydrogenase family 1 member A3	4	4	12.3	12.3	44.256	0	6.4859	208840000	10	NaN	0		NaN	1	0		NaN	1	0		1.48121	0.0414969	-1.81781		NaN	1	0		0.474459	0.562887	-0.508582
SULF1	Q8IWU6;A0A087WWR8;H0YDR1	Q8IWU6;A0A087WWR8	Extracellular sulfatase Sulf-1	10	10	12.2	12.2	101.03	0	45.491	1989200000	41	NaN	0		NaN	1	0		NaN	1	0		0.0945031	0.85152	-0.323237		0.0417162	0.90683	0.134463		0.46548	0.567932	1.04731
PHIP	Q8WWQ0;H7C409;H7BZR9;Q9NSI6	Q8WWQ0	PH-interacting protein	5	5	4.2	4.2	206.69	0	24.606	494940000	22	NaN	0		NaN	1	0		NaN	1	0		1.44654	0.0447329	-1.65723		0.307989	0.595204	-0.311279		0.452786	0.578088	0.493452
NOL10	Q9BSC4;H7C1Z3	Q9BSC4	Nucleolar protein 10	8	8	13.2	13.2	80.301	0	18.605	475050000	29	NaN	0		NaN	1	0		NaN	1	0		1.75982	0.0218657	-1.37436		2.85563	0.00620814	-0.97603		0.449808	0.580418	-0.304688
MSH2	P43246;A0A2R8Y7S8;A0A2R8YFH0;E9PHA6;A0A2R8Y6P0;A0A2R8YG02	P43246	DNA mismatch repair protein Msh2	3	3	3.3	3.3	104.74	0	6.7808	267030000	22	NaN	0		NaN	1	0		NaN	1	0		1.99156	0.0142053	-1.32933		1.95284	0.0208874	-1.6805		0.428602	0.591756	-0.344296
UBE2N;UBE2NL	P61088;Q5JXB2;F8VZ29;F8VSD4;F8VV71;F8VQQ8	P61088;Q5JXB2;F8VZ29;F8VSD4;F8VV71	Ubiquitin-conjugating enzyme E2 N;Putative ubiquitin-conjugating enzyme E2 N-like	3	3	19.7	19.7	17.138	0	10.932	274700000	18	NaN	0		NaN	1	0		NaN	1	0		1.13354	0.0906878	-1.77102		0.977197	0.140019	-1.19707		0.415817	0.601706	0.608868
UBTF	E9PKP7;P17480;E9PMM2;E9PLT2	E9PKP7;P17480	Nucleolar transcription factor 1	8	8	10.7	10.7	87.435	0	20.449	706860000	27	NaN	0		NaN	1	0		NaN	1	0		0.889973	0.147789	-1.31062		0.574226	0.425783	-0.829167		0.40865	0.607584	0.569656
EIF3CL;EIF3C	B5ME19;Q99613;H3BPE4	B5ME19;Q99613	Eukaryotic translation initiation factor 3 subunit C-like protein;Eukaryotic translation initiation factor 3 subunit C	7	7	6.8	6.8	105.47	0	11.124	244050000	40	NaN	0		NaN	1	0		NaN	1	0		2.69181	0.00486538	-2.31909		2.18031	0.0156259	-2.21031		0.33595	0.683231	0.369704
POLR1C	O15160;A0A2R8YEY5;E7EQB9;A0A2R8YEZ4;A0A2R8Y5D3;D6RDJ3;A0A2R8Y8D6;H0Y723	O15160;A0A2R8YEY5;E7EQB9;A0A2R8YEZ4;A0A2R8Y5D3	DNA-directed RNA polymerases I and III subunit RPAC1	5	5	17.3	17.3	39.249	0	11.486	452000000	24	NaN	0		NaN	1	0		NaN	1	0		2.28021	0.00926496	-1.66281		1.84944	0.0248408	-1.87555		0.332387	0.684795	0.308922
GTF3C3	A0A494C1S7;Q9Y5Q9;H7C0C0;F8WC64;H0YFI7	A0A494C1S7;Q9Y5Q9;H7C0C0	General transcription factor 3C polypeptide 3	4	4	7.4	7.4	71.458	0	10.878	513110000	34	NaN	0		0.614252	0.407177	-0.601034		0.0853797	0.905664	-0.107276		1.91186	0.0161026	-1.19939		3.05331	0.00425121	-1.96692		0.323596	0.6926	-0.243931
RBM8A	Q9Y5S9;A0A0J9YW13	Q9Y5S9	RNA-binding protein 8A	5	5	28.7	28.7	19.889	0	11.454	345250000	23	NaN	0		NaN	1	0		NaN	1	0		0.679975	0.223886	-0.979919		NaN	1	0		0.310282	0.702998	-0.430949
MYH3	P11055;P13535;Q9Y623;P12882;Q9UKX2	P11055	Myosin-3	4	4	2.4	2.4	223.9	0	10.442	133530000	9	NaN	0		NaN	1	0		NaN	1	0		0.926174	0.137634	-0.899599		NaN	1	0		0.300561	0.70907	-0.269537
DECR1	Q16698;E5RJG7;E5RFV2;E5RID6;E5RJD2;H0YAW3	Q16698;E5RJG7;E5RFV2	2,4-dienoyl-CoA reductase, mitochondrial	10	10	30.4	30.4	36.067	0	48.364	3430900000	49	NaN	0		NaN	1	0		NaN	1	0		0.0455575	0.919333	0.121884		0.953809	0.149144	1.40629		0.289922	0.719079	0.522166
SND1	Q7KZF4;H7C597	Q7KZF4;H7C597	Staphylococcal nuclease domain-containing protein 1	6	6	7.8	7.8	102	0	28.855	572330000	38	NaN	0		NaN	1	0		NaN	1	0		NaN	1	0		2.04368	0.0180136	-1.64136		0.281993	0.724841	0.301184
PDS5B	Q9NTI5;A9IYQ1	Q9NTI5;A9IYQ1	Sister chromatid cohesion protein PDS5 homolog B	10	10	10.1	10.1	164.67	0	135.8	1584500000	48	NaN	0		NaN	1	0		NaN	1	0		0.101651	0.842091	-0.139625		0.695963	0.337576	0.523712		0.265042	0.745573	0.246023
C8orf33	A0A3B3IRR6;A0A3B3IT54;A0A3B3ITA3;Q9H7E9	A0A3B3IRR6;A0A3B3IT54;A0A3B3ITA3;Q9H7E9	UPF0488 protein C8orf33	7	7	26.1	26.1	24.465	0	43.207	2104600000	32	NaN	0		NaN	1	0		NaN	1	0		0.127108	0.810353	-0.272971		0.125422	0.771993	0.372301		0.239294	0.776883	0.478359
DDX47	Q9H0S4;F5H1N9	Q9H0S4	Probable ATP-dependent RNA helicase DDX47	5	5	16.7	16.7	50.646	0	60.733	1071800000	43	NaN	0		NaN	1	0		NaN	1	0		0.412403	0.452007	-0.480629		0.313721	0.594419	-0.214759		0.229265	0.788344	0.201816
FASN	P49327;A0A0U1RQF0;A0A0U1RRG3	P49327;A0A0U1RQF0	Fatty acid synthase;[Acyl-carrier-protein] S-acetyltransferase;[Acyl-carrier-protein] S-malonyltransferase;3-oxoacyl-[acyl-carrier-protein] synthase;3-oxoacyl-[acyl-carrier-protein] reductase;3-hydroxyacyl-[acyl-carrier-protein] dehydratase;Enoyl-[acyl-carrier-protein] reductase;Oleoyl-[acyl-carrier-protein] hydrolase	11	11	4.5	4.5	273.42	0	44.963	767610000	53	NaN	0		NaN	1	0		NaN	1	0		0.687901	0.220049	-1.58762		1.40212	0.054865	-2.29942		0.216316	0.799612	-0.500226
DDX52	Q9Y2R4;A0A087X1P7;A0A087WTD6;A0A087X069;A0A087X121	Q9Y2R4	Probable ATP-dependent RNA helicase DDX52	3	3	5.7	5.7	67.497	0	9.0618	359030000	15	NaN	0		NaN	1	0		NaN	1	0		1.08782	0.0987519	-1.1641		2.17426	0.0155429	-1.52588		0.209027	0.80116	-0.231638
NMT1	P30419;K7EN82;B7Z8J4;Q5VUC6;O60551	P30419;K7EN82;B7Z8J4	Glycylpeptide N-tetradecanoyltransferase 1	4	4	8.1	8.1	56.806	0	14.721	1154100000	17	NaN	0		NaN	1	0		NaN	1	0		1.00195	0.118784	-1.49826		0.0132568	0.970129	0.0392332		0.208463	0.800777	0.393091
RRP9	O43818	O43818	U3 small nucleolar RNA-interacting protein 2	6	6	14.5	14.5	51.84	0	11.112	2373200000	50	NaN	0		NaN	1	0		NaN	1	0		0.804119	0.175413	0.820744		0.569489	0.428865	0.574341		0.205153	0.804496	-0.192962
RPS27L	H0YMV8;Q71UM5;C9JLI6;C9J1C5	H0YMV8;Q71UM5;C9JLI6	40S ribosomal protein S27;40S ribosomal protein S27-like	1	1	13	13	11.345	0	9.0719	1460100000	18	NaN	0		NaN	1	0		NaN	1	0		0.0520702	0.914108	-0.141013		0.549957	0.441663	-1.23593		0.198968	0.806971	-0.414611
SMC1A	Q14683;G8JLG1;H0Y7K8;V9GY57;V9GYN9	Q14683;G8JLG1	Structural maintenance of chromosomes protein 1A;Structural maintenance of chromosomes protein	11	11	8.9	8.9	143.23	0	20.722	1141300000	67	NaN	0		0.487735	0.480627	0.467447		0.105109	0.895964	0.169323		0.304978	0.561943	-0.265446		0.181102	0.699966	-0.327797		0.198424	0.806557	-0.201057
TP53BP1	A6NNK5;Q12888;M0R142;H7BZY0;H7C3N7;C9JXV0	A6NNK5;Q12888	Tumor suppressor p53-binding protein 1	5	5	3.6	3.6	209.02	0	20.207	311710000	24	NaN	0		0.0375031	0.878113	0.0619891		0.420222	0.682327	0.477344		1.2431	0.0728711	-1.32815		1.45222	0.0491977	-1.08956		0.198276	0.805454	-0.232318
MORC2	Q9Y6X9;H7C3M1;H7C1V1	Q9Y6X9	MORC family CW-type zinc finger protein 2	3	3	3.9	3.9	117.82	0	6.4008	167430000	19	NaN	0		NaN	1	0		NaN	1	0		2.32194	0.00867532	-1.43102		NaN	1	0		0.19071	0.80951	-0.146398
COLEC12	Q5KU26	Q5KU26	Collectin-12	7	7	11.3	11.3	81.514	0	19.861	1520500000	38	NaN	0		NaN	1	0		NaN	1	0		0.196207	0.704934	-0.310188		0.23006	0.659468	-0.512639		0.188384	0.809806	-0.304098
RSPO2	Q6UXX9	Q6UXX9	R-spondin-2	1	1	5.3	5.3	28.315	0	11.356	850650000	13	NaN	0		NaN	1	0		NaN	1	0		0.93972	0.13539	-1.69068		0.195928	0.687412	-0.501811		0.182593	0.811739	0.393404
YTHDC2	Q9H6S0;D6RA70;D6R9T8;D6RF50	Q9H6S0;D6RA70	Probable ATP-dependent RNA helicase YTHDC2	11	11	9	9	160.25	0	23.234	555170000	27	NaN	0		NaN	1	0		NaN	1	0		1.99216	0.0142443	-1.54208		1.59538	0.0390888	-1.37519		0.158441	0.836944	0.148774
ASPH	Q12797;E5RHK2;A0A087WW51;E5RHJ2;G3XAN5;A0A087WUJ2;E5RG29;E5RG56	Q12797	Aspartyl/asparaginyl beta-hydroxylase	12	12	16.9	16.9	85.862	0	25.878	1443400000	36	NaN	0		NaN	1	0		NaN	1	0		0.761341	0.189135	-1.48314		0.139818	0.753553	-0.488842		0.155598	0.838324	0.396771
ABCF1	Q8NE71;H0YGW7;A0A0G2JIC2;F5GYK6	Q8NE71;H0YGW7	ATP-binding cassette sub-family F member 1	14	10	19.1	12.2	95.925	0	110.05	2987300000	74	NaN	0		NaN	1	0		NaN	1	0		0.296442	0.569081	0.499802		0.523014	0.457024	0.929962		0.151112	0.841703	0.256187
PFKM	P08237;F8VZI0;A0A2R8Y891;F8VP00;F8VSF7;F8VW30;F8VX13;F8VZQ1;F8VTQ3;F8VUB8;F8VYK8;F8VVE3;F8VZ53;F8VSF5	P08237;F8VZI0;A0A2R8Y891	ATP-dependent 6-phosphofructokinase, muscle type	11	9	17.6	15.3	85.182	0	56.921	723650000	53	NaN	0		NaN	1	0		NaN	1	0		0.784699	0.181278	-0.944456		1.77143	0.0282375	-1.53571		0.150526	0.840157	-0.184448
G3BP1	Q13283;E5RI46;E5RIF8;E5RH42;E5RIZ6;E5RJU8;E5RH00	Q13283	Ras GTPase-activating protein-binding protein 1	8	8	27.7	27.7	52.164	0	71.183	3065100000	36	NaN	0		NaN	1	0		NaN	1	0		0.205822	0.690551	-0.585937		0.195319	0.686971	-0.603651		0.13509	0.861265	-0.362436
RAB1B	Q9H0U4;E9PLD0	Q9H0U4;E9PLD0	Ras-related protein Rab-1B	5	2	25.4	12.4	22.171	0	5.7062	147900000	22	NaN	0		NaN	1	0		NaN	1	0		2.39627	0.0080177	-1.96726		NaN	1	0		0.116489	0.868513	-0.16273
CENPC	Q03188;H0Y8J2;H0Y9W1	Q03188;H0Y8J2	Centromere protein C	8	8	10.2	10.2	106.83	0	18.453	803650000	39	NaN	0		NaN	1	0		NaN	1	0		1.06131	0.104914	-1.11099		0.355648	0.569298	-0.421429		0.108197	0.878557	0.135787
PA2G4	Q9UQ80;F8VR77	Q9UQ80	Proliferation-associated protein 2G4	12	12	24.9	24.9	43.786	0	67.807	1803900000	48	NaN	0		NaN	1	0		NaN	1	0		0.0550944	0.912499	0.131153		0.213671	0.67425	0.270311		0.104994	0.879661	0.181741
DDX10	Q13206;E9PIF2;A0A3B3ISR7	Q13206;E9PIF2;A0A3B3ISR7	Probable ATP-dependent RNA helicase DDX10	15	15	20.2	20.2	100.89	0	32.683	1577900000	51	NaN	0		NaN	1	0		NaN	1	0		0.175501	0.738333	-0.282649		0.275585	0.61748	-0.390397		0.086754	0.897417	-0.117094
RBM15B	Q8NDT2	Q8NDT2	Putative RNA-binding protein 15B	7	7	8.8	8.8	97.204	0	12.771	405840000	25	NaN	0		NaN	1	0		NaN	1	0		1.59657	0.0324917	-1.50093		1.73918	0.0295062	-1.45569		0.0681583	0.918003	0.0747748
PSMC2	P35998;C9JLS9	P35998;C9JLS9	26S protease regulatory subunit 7	2	2	5.5	5.5	48.633	0	13.742	97768000	14	NaN	0		NaN	1	0		NaN	1	0		1.20979	0.0773961	-1.35908		NaN	1	0		0.0500242	0.939398	-0.0715615
RUVBL1	Q9Y265;E7ETR0;H7C4G5;J3QLR1;H7C4I3	Q9Y265;E7ETR0	RuvB-like 1	6	6	16.4	16.4	50.227	0	13.508	556010000	48	NaN	0		0.264094	0.589048	-0.436842		0.105343	0.898257	-0.129827		1.08002	0.100867	-1.79226		1.22027	0.0808819	-1.67788		0.0158991	0.982316	-0.0346874
DCAF13	A0A087WT20;Q9NV06;B3KME9;E5RHM4;A0A087X1F8	A0A087WT20;Q9NV06;B3KME9	DDB1- and CUL4-associated factor 13	5	5	8	8	67.55	0	6.6934	598850000	21	NaN	0		NaN	1	0		NaN	1	0		1.10893	0.0949714	-1.18216		1.69468	0.0320976	-1.61426		0.0143122	0.981851	0.0206735
MPHOSPH10	O00566;U3KQ48	O00566;U3KQ48	U3 small nucleolar ribonucleoprotein protein MPP10	5	5	9	9	78.863	0	29.468	1407600000	39	NaN	0		NaN	1	0		NaN	1	0		0.29809	0.568212	-0.346065		0.0294877	0.932019	0.0614456		0.0115129	0.982559	-0.016953
TUBB2B	Q9BVA1	Q9BVA1	Tubulin beta-2B chain	7	2	19.6	3.6	49.953	0	180.53	37244000000	268	2.30889	-0.384503		7.35194	0	-3.58444		7.17036	0	-1.12488		0.699423	0.216	-0.724042		3.31975	0.00304762	-1.22191		0.0409798	0.95138	0.0429467
HSPA8	P11142;E9PKE3;E9PN89;E9PNE6;E9PLF4;E9PQQ4;E9PQK7;E9PK54;A8K7Q2;E9PPY6;P54652;E9PN25;E9PI65;E9PM13;E9PS65	P11142;E9PKE3;E9PN89;E9PNE6;E9PLF4	Heat shock cognate 71 kDa protein	24	20	36.1	32	70.897	0	178.49	17781000000	503	1.86883	-0.466448		3.67754	0.00240316	-0.916401		0.716054	0.522894	-0.174791		0.32688	0.539946	0.177169		1.741	0.0295604	-0.603223		1.73356	0.144035	-0.46153
CAND1	Q86VP6;A0A0C4DGH5;H0YH27;F5H6I6;A0A3B3ISC4;F8WBB8;O75155	Q86VP6;A0A0C4DGH5	Cullin-associated NEDD8-dissociated protein 1	11	11	10.8	10.8	136.37	0	37.672	214180000	67	1.45504	-0.487773		0.73139	0.304094	-0.85183		2.30146	0.179135	-0.94591		NaN	1	0		NaN	1	0		NaN	1	0
HSP90AB1	P08238;Q58FF7;Q58FF8;Q14568	P08238	Heat shock protein HSP 90-beta	21	15	30.1	20.6	83.263	0	147.76	6240700000	304	1.51192	-0.735584		0.579162	0.43017	-0.440928		0.310938	0.75027	0.18966		0.420019	0.443729	-0.431149		2.55349	0.00887097	-1.45717		0.76256	0.407193	-0.521997
RPS5	M0R0F0;M0R0R2;P46782;M0QZN2	M0R0F0;M0R0R2;P46782;M0QZN2	40S ribosomal protein S5;40S ribosomal protein S5, N-terminally processed	13	13	44.5	44.5	22.391	0	104.07	7987500000	208	2.74623	-0.766691		3.00931	0.00390667	-0.632942		0.37207	0.712727	-0.113173		3.56635	0.00165161	-1.67678		2.71376	0.0075234	-1.65925		0.326874	0.690331	-0.208379
KHDRBS1	Q07666	Q07666	KH domain-containing, RNA-binding, signal transduction-associated protein 1	13	8	32.1	23.9	48.227	0	235.42	26885000000	328	2.63654	-0.892491		1.88322	0.0131382	-0.294618		0.615881	0.569104	-0.190756		1.1675	0.0851444	-0.322926		1.63117	0.0359881	-0.607275		0.103185	0.880534	0.0290125
TUBB	Q5JP53;P07437;Q5ST81;A0A075B736;Q5SQY0;A6NNZ2;CON__ENSEMBL:ENSBTAP00000025008;Q9H4B7	Q5JP53;P07437;Q5ST81	Tubulin beta chain	6	6	17.8	17.8	47.766	0	67.258	35811000000	145	4.30632	-1.12067		6.50421	0	-2.96523		3.41861	0.064	-0.6559		0.335863	0.532833	-0.353523		2.14697	0.0159018	-1.40982		0.985975	0.335621	-0.63514
LUC7L2	Q9Y383;A0A0A6YYJ8;V9GZ75;F8WEU3	Q9Y383;A0A0A6YYJ8	Putative RNA-binding protein Luc7-like 2	15	9	34.2	21.7	46.513	0	62.064	3888800000	164	4.52984	-1.15627		0.922793	0.130824	0.696173		1.32182	0.30428	0.476771		1.39535	0.0505399	-1.6427		0.0118008	0.969838	-0.0228214		0.95023	0.345609	0.784355
UQCRC2	P22695;H3BRG4;H3BSJ9;H3BP04;A0A087WVZ4;H3BUE4;H3BUI9	P22695;H3BRG4;H3BSJ9	Cytochrome b-c1 complex subunit 2, mitochondrial	14	14	37.1	37.1	48.442	0	78.887	941140000	129	1.29959	-1.1631		7.15612	0	-3.63132		1.77398	0.228354	-0.970337		1.30151	0.0626706	-2.05167		1.82196	0.0256582	-3.06251		0.00556999	0.991462	-0.00933562
TUBA1A;TUBA1C;TUBA3E	Q71U36;F5H5D3;Q9BQE3;P0DPH8;P0DPH7;A0A1W2PQM2;Q6PEY2;C9J2C0;Q9NY65;V9GZ17;C9JEV8;C9JQ00;C9JJQ8;C9JDL2	Q71U36;F5H5D3;Q9BQE3;P0DPH8;P0DPH7;A0A1W2PQM2;Q6PEY2	Tubulin alpha-1A chain;Tubulin alpha-1C chain;Tubulin alpha-3E chain	30	1	53.7	2.9	50.135	0	323.31	212290000000	821	4.95966	-1.18778		6.012	0.000494845	-2.23676		0.728363	0.52264	-0.155304		0.228433	0.655271	-0.247006		2.38886	0.0112824	-0.419079		0.539093	0.531888	-0.3385
ATP5B	P06576;H0YH81;F8W079;F8W0P7;H0YI37	P06576;H0YH81;F8W079	ATP synthase subunit beta, mitochondrial;ATP synthase subunit beta	17	17	42.5	42.5	56.559	0	57.594	2711800000	217	2.17232	-1.22344		6.33574	0.000615385	-3.84365		1.76744	0.22558	-0.735072		3.45056	0.00195122	-2.03641		2.47855	0.0103016	-3.93339		1.98649	0.097617	-1.67462
PRPF38B	Q5VTL8;A0A0A0MRN0	Q5VTL8;A0A0A0MRN0	Pre-mRNA-splicing factor 38B	5	5	7.9	7.9	64.467	0	11.324	105270000	15	1.45667	-1.27703		NaN	1	0		1.8131	0.225946	-0.935767		NaN	1	0		NaN	1	0		NaN	1	0
PCCA	P05165;A0A1B0GU58;A0A1B0GWI4;A0A1B0GUX9;A0A1B0GWA1;A0A1B0GTR1;H0Y5U0;Q5JTW6;Q5JVH2	P05165;A0A1B0GU58;A0A1B0GWI4;A0A1B0GUX9;A0A1B0GWA1	Propionyl-CoA carboxylase alpha chain, mitochondrial	57	57	64.7	64.7	80.058	0	323.31	129990000000	1632	1.29513	-1.3729		4.02057	0.00189189	-2.21171		0.300324	0.752898	-0.314524		3.6446	0.00153642	-2.09104		4.60279	0.00046281	-2.469		0.333531	0.685512	-0.220932
SLC25A3	Q00325;F8VVM2;F8VZL5;F8VWR4;F8VWQ0	Q00325;F8VVM2	Phosphate carrier protein, mitochondrial	14	14	26.2	26.2	40.094	0	23.861	9028100000	138	2.18718	-1.44278		3.93583	0.00196522	-0.940046		0.265506	0.784126	-0.184725		0.141927	0.788287	-0.553577		1.30586	0.0664173	-3.95282		0.748778	0.411564	-1.87092
PHB2	F5GY37;J3KPX7;Q99623;F5GWA7;F5H3X6;F5H2D2;F5H0C5;U3KPZ5	F5GY37;J3KPX7;Q99623;F5GWA7;F5H3X6	Prohibitin-2	13	13	52.1	52.1	29.723	0	22.489	1098900000	124	2.31598	-1.46461		4.05988	0.00189862	-1.54604		0.427858	0.677851	-0.256783		1.043	0.109939	-1.76896		3.56326	0.00225989	-3.55724		2.16367	0.0828493	-2.22849
ZNF292	O60281;J3KNV1;H0YB79	O60281;J3KNV1	Zinc finger protein 292	5	5	2.3	2.3	304.81	0	10.838	114010000	21	1.61674	-1.50645		NaN	1	0		0.119375	0.884203	0.171648		NaN	1	0		NaN	1	0		NaN	1	0
TUBB4B	P68371;Q3ZCM7	P68371	Tubulin beta-4B chain	28	2	60	3.6	49.83	0	323.31	181050000000	875	3.35527	-1.52214		5.2868	0.000742857	-2.16179		0.478786	0.637233	-0.227225		1.4315	0.0458092	-0.952075		3.87899	0.00165161	-0.830873		0.0332294	0.961503	0.0260916
SLC25A6	P12236	P12236	ADP/ATP translocase 3;ADP/ATP translocase 3, N-terminally processed	14	4	39.3	14.4	32.866	0	26.91	14148000000	238	1.63632	-1.53426		4.0351	0.00190909	-1.27847		0.162432	0.863493	-0.16596		0.282543	0.587612	-0.391843		3.73652	0.00171084	-1.38284		1.12332	0.293228	-0.812225
TUBB3	Q13509;A0A0B4J269;G3V2A3;G3V5W4;G3V2R8;G3V3R4;G3V2N6;G3V542;G3V3J6;G3V3W7	Q13509;A0A0B4J269	Tubulin beta-3 chain	14	11	41.3	36	50.432	0	143.94	52545000000	426	2.52698	-1.5801		6.51588	0	-2.37908		0.510634	0.636977	-0.304547		1.28206	0.0655233	-1.46463		3.81161	0.00173171	-1.51718		0.129195	0.865632	-0.159084
HSP90B1	P14625;H0YIV0;Q96GW1;A0A1W2PRR1;F8W026;Q58FF3	P14625	Endoplasmin	11	11	13.9	13.9	92.468	0	33.359	839520000	103	1.50098	-1.5869		3.32416	0.00302899	-1.28717		0.227576	0.813718	0.246045		0.628734	0.254456	-1.21501		0.283848	0.612882	-0.569803		0.0157026	0.981382	0.0366218
KRAS	P01116;G3V4K2;G3V5T7	P01116	GTPase KRas;GTPase KRas, N-terminally processed	3	1	16.9	4.8	21.656	0	4.4212	105600000	24	1.48693	-1.60285		NaN	1	0		NaN	1	0		NaN	1	0		NaN	1	0		NaN	1	0
LMNB1	P20700;E9PBF6;A0A0D9SFE5;A0A0D9SFY5;A0A0C4DGC5;Q5TCI8	P20700;E9PBF6;A0A0D9SFE5	Lamin-B1	26	23	42.3	38.4	66.408	0	71.689	2903100000	267	2.49916	-1.66882		1.89564	0.013079	-0.524473		0.13965	0.875434	-0.109011		1.86611	0.0178551	-3.39606		2.65972	0.00808368	-2.00029		0.799905	0.399725	1.22628
HSPA9	P38646;A0A3B3ITI4;D6RJI2;D6RA73;H0YBG6;A0A3B3ITN1	P38646	Stress-70 protein, mitochondrial	15	15	27.1	27.1	73.68	0	41.427	1676500000	115	2.03802	-1.69149		0.679817	0.357857	-1.53467		0.42602	0.678865	-0.563206		2.88233	0.0038	-1.88012		2.13463	0.0158881	-4.28977		1.68179	0.149024	-1.82132
EEF1A1P5;EEF1A1	Q5VTE0;P68104;A0A087WV01;A0A087WVQ9;A0A2U3TZH3;Q05639;A6PW80;Q5JR01;A0A2R8Y488;A0A2R8Y660;A0A2R8YDN5	Q5VTE0;P68104;A0A087WV01;A0A087WVQ9	Putative elongation factor 1-alpha-like 3;Elongation factor 1-alpha 1;Elongation factor 1-alpha	20	20	32.7	32.7	50.184	0	86.505	22543000000	324	3.78526	-1.75793		6.81526	0	-1.61381		0.221477	0.823246	0.112823		2.44241	0.00746188	-2.03538		3.58685	0.00228571	-1.87928		0.231675	0.785399	-0.209778
CEP170	H0Y2V6;Q5SW79;H0Y4T4;E7EWM2;E7EMW0;E5RG47;Q96L14;E5RGW7	H0Y2V6;Q5SW79;H0Y4T4	Centrosomal protein of 170 kDa	13	13	9.8	9.8	171.97	0	27.008	1456100000	95	3.96747	-1.76033		1.12576	0.0650743	0.895641		0.0766171	0.916841	0.0596104		0.822333	0.169734	-0.968273		0.138223	0.755322	-0.0755272		1.26644	0.254232	0.928983
DCX	A0A1B0GWD1;A8K340;O43602;E7EU50;A0A1B0GUE1	A0A1B0GWD1;A8K340;O43602;E7EU50;A0A1B0GUE1	Neuronal migration protein doublecortin	18	17	42.4	39.3	40.143	0	91.726	6306900000	308	4.36858	-1.78092		1.704	0.0177953	-1.30262		1.16897	0.338841	0.589756		1.2323	0.0741296	-1.94812		0.757329	0.276884	-2.07171		0.519674	0.539447	-1.0539
ATP5A1	P25705;K7EK77;K7ENJ4;K7ERX7;K7EJP1;K7EQH4;K7ESA0	P25705;K7EK77	ATP synthase subunit alpha, mitochondrial	35	35	47.6	47.6	59.75	0	182.14	33131000000	646	1.39051	-1.81495		5.05072	0.000794872	-2.53541		0.24514	0.801166	-0.320958		2.5928	0.00585185	-2.33918		3.60921	0.00216279	-2.78489		0.488113	0.555122	-0.471895
TUBB4A	P04350;M0QY85;M0R2D3;M0QZL7;M0QYM7;M0R278;M0R0X0;M0QY37;M0QX14;M0R042;M0R1I1;M0R2T4;A0A075B724	P04350	Tubulin beta-4A chain	5	4	11.7	11.7	49.585	0	58.84	1825800000	100	2.60785	-1.88212		3.33555	0.00304	-2.06859		0.362757	0.72073	0.296687		1.2091	0.0774144	-2.82141		1.75224	0.0292422	-3.15009		0.873042	0.378625	-1.69712
ADD1	E7EV99;E7ENY0;P35611;H0Y9H2;A0A0A0MSR2;H0YFD8;H0YG19;D6RF25	E7EV99;E7ENY0;P35611;H0Y9H2	Alpha-adducin	7	6	13.6	12.3	70.055	0	20.569	669200000	46	1.76747	-1.96656		NaN	1	0		NaN	1	0		0.408695	0.455285	-0.578873		1.7922	0.0270094	-1.70868		1.52311	0.181041	-1.26927
PCCB	E9PDR0;E7EX59;P05166;E7ETT1;C9JQS9;E7ETT4;E7EUY3;E9PEC3;F8WBI9;E7ENC1;H7C5C9;C9JVY9;C9JVW9;C9JAW3	E9PDR0;E7EX59;P05166;E7ETT1;C9JQS9;E7ETT4;E7EUY3;E9PEC3;F8WBI9;E7ENC1	Propionyl-CoA carboxylase beta chain, mitochondrial	30	30	56.5	56.5	59.403	0	323.31	98474000000	845	1.61216	-1.97303		5.00577	0.001075	-2.08589		0.181817	0.854085	-0.238524		6.06428	0.000235294	-3.15785		6.52751	0	-2.83876		0.0989452	0.884514	0.0573852
NNT	A0A590UJM2;A0A590UK29;Q13423;A0A590UK15;A0A590UJI3;E9PCX7;D6RHU2;A0A590UJA4;A0A590UKC7;D6RAI5;D6RCR6	A0A590UJM2;A0A590UK29;Q13423;A0A590UK15;A0A590UJI3;E9PCX7;D6RHU2;A0A590UJA4;A0A590UKC7;D6RAI5	NAD(P) transhydrogenase, mitochondrial	6	6	14.4	14.4	52.178	0	10.606	81983000	32	2.28446	-2.10145		NaN	1	0		NaN	1	0		3.059	0.00278534	-3.10225		NaN	1	0		NaN	1	0
DNAJA1	P31689	P31689	DnaJ homolog subfamily A member 1	4	4	12.6	12.6	44.868	0	35.978	873040000	61	1.30678	-2.1026		0.0272381	0.908886	0.05305		0.572325	0.597423	0.726839		0.709371	0.211457	-1.54026		1.15512	0.0924433	-1.62645		0.560544	0.51879	-0.992334
ATP1A3;ATP1A2	M0R116;A0A2R8YEY8;A0A0A0MT26;P13637;B1AKY9;P50993;H0Y7C1;Q13733;M0QXF2;E9PRA5;P20648;P54707;Q5TC05;A0A669K9X0	M0R116;A0A2R8YEY8;A0A0A0MT26;P13637;B1AKY9;P50993	Sodium/potassium-transporting ATPase subunit alpha-3;Sodium/potassium-transporting ATPase subunit alpha-2	4	4	4.6	4.6	108.28	0	5.2333	78728000	26	1.47165	-2.14741		0.453164	0.495197	-0.828977		0.485604	0.64486	-0.715018		4.27351	0.000628099	-3.0569		NaN	1	0		NaN	1	0
VIM	P08670;B0YJC4;B0YJC5;A0A1B0GTT5;A0A1B0GVG8;P17661;H7C5W5;P41219;A0A1W2PR46;P14136;A0A1X7SBR3;O43790;U3KPR1;CON__Q14533;CON__Q6NT21;CON__P78385;CON__O43790;A0A087X106;CON__Q61726;CON__P78386;A0A1W2PRT3;A0A1X7SCE1;P78386;Q14533;P78385;K7ELP4;F8W835;K7EJU1;K7EKH9;B4DIR1	P08670;B0YJC4	Vimentin	37	33	66.7	62.2	53.651	0	273.83	23576000000	631	4.2029	-2.18185		6.24232	0.000571429	-1.46586		0.773259	0.508865	0.33966		1.69289	0.0255945	-1.62349		3.11942	0.00411881	-2.62983		0.571378	0.511702	-0.554939
YWHAG	P61981;K7EIT4;A2IDB2	P61981	14-3-3 protein gamma;14-3-3 protein gamma, N-terminally processed	6	4	23.9	17.4	28.302	0	26.311	563700000	50	1.68736	-2.28217		0.149645	0.678626	0.340254		0.0428243	0.959932	0.0878279		0.885436	0.149073	-1.89748		NaN	1	0		0.195017	0.8071	-0.397417
MYH10	P35580;E7ERA5;A0A0C4DFM8;A1L2Z2	P35580	Myosin-10	22	18	13.4	11.3	229	0	86.722	1208700000	126	2.59477	-2.30738		0.460265	0.49269	-0.581437		2.02646	0.200143	1.46403		0.0322397	0.945059	0.0391246		3.18017	0.00361616	-3.92458		3.48238	0.0166667	-2.27165
MCCC1	Q96RQ3;E9PHF7;F5GYT8;E9PG35;G5E9X5;F8WDI3	Q96RQ3;E9PHF7;F5GYT8;E9PG35;G5E9X5	Methylcrotonoyl-CoA carboxylase subunit alpha, mitochondrial	42	42	54.3	54.3	80.472	0	323.31	26991000000	600	3.20078	-2.38818		3.73591	0.00222581	-2.49451		0.502644	0.64009	0.405588		5.12744	0.000525253	-3.82429		7.65493	0	-4.27817		0.0969178	0.885567	0.0841844
DYNC1H1	Q14204;A0A2R8Y706;A0A2R8YFZ7;A0A2R8Y5T0;A0A2R8Y542;A0A2R8Y6H2;A0A2R8YGC7;A0A2R8Y6I5;H0YJ21	Q14204	Cytoplasmic dynein 1 heavy chain 1	75	75	17.5	17.5	532.4	0	202.57	15903000000	633	5.72157	-2.45701		5.39585	0.000787879	-1.9193		0.789559	0.501478	0.278098		1.28329	0.0655743	-1.53478		2.83389	0.00636771	-1.47808		0.0319942	0.963036	-0.0460937
RAB6B	Q9NRW1;C9J0I2;J3KR73;C9JB90;C9JU14;Q14964;Q9H0N0	Q9NRW1;C9J0I2;J3KR73	Ras-related protein Rab-6B	4	1	21.2	4.8	23.461	0	7.9097	203970000	33	1.51699	-2.47268		0.0397315	0.872673	0.113543		0.2778	0.769753	0.505215		NaN	1	0		NaN	1	0		NaN	1	0
GAPDH	P04406;E7EUT5;O14556	P04406;E7EUT5	Glyceraldehyde-3-phosphate dehydrogenase	22	22	57.6	57.6	36.053	0	96.216	18923000000	296	3.72966	-2.50732		3.24752	0.00314591	-2.21885		0.960531	0.415363	-0.624416		6.88442	0.000166667	-3.0228		7.528	0	-3.09309		1.55828	0.174156	0.419088
MCCC2	Q9HCC0;D6RD67;D6RDF7;D6R9R1;A0A0G2JM88	Q9HCC0	Methylcrotonoyl-CoA carboxylase beta chain, mitochondrial	31	31	51.9	51.9	61.332	0	323.31	30850000000	744	3.26104	-2.55066		2.90093	0.00462745	-2.16903		0.557758	0.611775	0.478217		7.43914	0	-3.32662		4.85567	0.000269231	-3.28262		0.137729	0.859306	0.0804621
LMNB2	Q03252	Q03252	Lamin-B2	7	7	12.4	12.4	69.948	0	12.625	146180000	26	2.78374	-2.73329		1.56874	0.0237506	-1.74912		NaN	1	0		NaN	1	0		NaN	1	0		NaN	1	0
ATP1A1	P05023;Q5TC01;Q5TC02	P05023	Sodium/potassium-transporting ATPase subunit alpha-1	13	4	15.2	4.2	112.89	0	38.445	353240000	78	2.0644	-2.73915		3.54329	0.00264639	-2.71808		0.496025	0.641209	-0.634565		4.62834	0.000504505	-3.22498		2.5024	0.009696	-2.52108		0.196547	0.805843	0.18672
PC	P11498;A0A494C016;A0A494C101;A0A494C0T2;E9PRE7;A0A494BZT5	P11498;A0A494C016	Pyruvate carboxylase, mitochondrial	65	65	54.8	54.8	129.63	0	323.31	53380000000	1255	4.52718	-2.74011		6.91121	0	-2.99004		0.843415	0.470031	-0.428085		6.73465	0.00016	-3.42479		5.20412	0	-3.196		0.0987638	0.883558	-0.0620527
ACACA	Q13085;Q59FY4;A0A0C4DGT1;A0A087WWN5;S4R3S7;A0A087WYS8;A0A087X2F8;A0A087X126	Q13085;Q59FY4	Acetyl-CoA carboxylase 1;Biotin carboxylase	144	122	49.1	40.8	265.55	0	323.31	100700000000	2428	4.93988	-2.74198		3.39914	0.00273529	-2.23705		0.357145	0.723734	-0.243924		10.6103	0	-4.44182		6.20502	0	-3.17655		5.26366	0.00133333	0.884774
LASP1	Q14847;C9J9W2;J3KSN1	Q14847;C9J9W2	LIM and SH3 domain protein 1	7	7	27.6	27.6	29.717	0	27.092	368000000	61	1.67109	-2.77241		2.66259	0.00574018	-2.4242		0.0235921	0.983945	-0.050888		1.43864	0.0452012	-2.59666		4.00811	0.00132432	-3.82357		0.215377	0.7986	-0.413924
STXBP1	A0A1B0GWF2;A0A1B0GVQ5;A0A2R8Y5D4;A0A0D9SG72;A0A1B0GTP9;P61764;A0A1B0GW76;A0A1B0GTD8;A0A0D9SEH5;A0A1B0GVV9;A0A096LP52;A0A0D9SFQ7;A0A0D9SFW6	A0A1B0GWF2;A0A1B0GVQ5;A0A2R8Y5D4;A0A0D9SG72;A0A1B0GTP9;P61764;A0A1B0GW76	Syntaxin-binding protein 1	5	5	8.9	8.9	65.215	0	11.283	245980000	54	2.16123	-2.86984		3.90786	0.0019234	-3.16549		0.585378	0.583913	-0.740816		0.736211	0.198114	-1.1098		NaN	1	0		1.00046	0.330876	-0.942681
NCAM1	A0A0D9SF98;A0A087WWJ5;A0A087WTF6;A0A087WX77;A0A087WWD4;A0A087WV75;P13591;A0A087WVU1;H7BYX6;A0A087WTE4;A0A087X1V2;A0A087WZS4;A0A0C4DGS4;A0A087WTR3;A0A0D9SF30	A0A0D9SF98;A0A087WWJ5;A0A087WTF6;A0A087WX77;A0A087WWD4;A0A087WV75;P13591;A0A087WVU1;H7BYX6;A0A087WTE4;A0A087X1V2;A0A087WZS4	Neural cell adhesion molecule 1	8	8	29.1	29.1	38.612	0	9.5267	30247000	18	3.07921	-2.89181		NaN	1	0		NaN	1	0		NaN	1	0		NaN	1	0		NaN	1	0
ATP6V1E1	P36543;C9J8H1;Q96A05	P36543;C9J8H1	V-type proton ATPase subunit E 1	8	8	34.1	34.1	26.145	0	16.818	222800000	68	1.95057	-2.93448		2.64147	0.00611976	-3.71007		0.731941	0.520212	-1.09073		3.7377	0.00129655	-4.06789		3.97326	0.00150336	-3.30407		NaN	1	0
MARCKSL1	P49006	P49006	MARCKS-related protein	2	2	14.4	14.4	19.529	0	14.097	205500000	31	2.03635	-3.01366		NaN	1	0		0.046545	0.955102	-0.0904406		NaN	1	0		1.87382	0.0242201	-2.53182		NaN	1	0
TUFM	P49411;H3BNU3	P49411	Elongation factor Tu, mitochondrial	16	16	38.9	38.9	49.541	0	66.9	6209200000	202	2.3081	-3.02962		2.39526	0.00777778	-3.50866		0.37208	0.71422	-0.600599		1.22252	0.0756742	-1.81498		3.60238	0.00215029	-6.591		3.26957	0.01904	-3.55919
PAICS	P22234;E9PBS1;D6RF62	P22234;E9PBS1	Multifunctional protein ADE2;Phosphoribosylaminoimidazole-succinocarboxamide synthase;Phosphoribosylaminoimidazole carboxylase	5	5	11.1	11.1	47.079	0	14.6	1043500000	55	1.79028	-3.07756		2.79107	0.00513016	-2.72181		0.00124158	0.997123	-0.00290733		3.09182	0.00261702	-2.87013		NaN	1	0		NaN	1	0
PCMT1	A0A0A0MRJ6;P22061;F6S8N6;A0A3F2YNX8;F8WDT3;F8WAV5;F8WAX2;C9J0F2;H7C4X2	A0A0A0MRJ6;P22061;F6S8N6;A0A3F2YNX8	Protein-L-isoaspartate O-methyltransferase;Protein-L-isoaspartate(D-aspartate) O-methyltransferase	18	18	46.3	46.3	30.315	0	97.787	21486000000	363	5.41162	-3.24456		4.99109	0.00106173	-2.54268		0.480204	0.63981	0.27884		6.31228	0.000131148	-4.54297		4.44227	0.00075	-2.8723		2.43012	0.0667451	1.01127
USO1	O60763	O60763	General vesicular transport factor p115	7	7	9.6	9.6	107.89	0	23.766	124820000	33	2.76842	-3.24466		1.45923	0.0297436	-1.27242		NaN	1	0		3.36867	0.00218824	-3.33394		NaN	1	0		NaN	1	0
ATP2B1;ATP2B3;ATP2B4;ATP2B2	E7ERY9;P20020;A0A2R8Y4R4;A0A2U3U055;A0A2U3TZI3;Q16720;P23634;Q01814	E7ERY9;P20020;A0A2R8Y4R4;A0A2U3U055;A0A2U3TZI3;Q16720;P23634;Q01814	Calcium-transporting ATPase;Plasma membrane calcium-transporting ATPase 1;Plasma membrane calcium-transporting ATPase 3;Plasma membrane calcium-transporting ATPase 4;Plasma membrane calcium-transporting ATPase 2	4	4	5.2	5.2	106.86	0	7.0026	46591000	22	2.89441	-3.42792		1.70733	0.0178105	-2.00252		0.120048	0.885535	-0.189331		NaN	1	0		NaN	1	0		NaN	1	0
IDH2	P48735;H0YL11	P48735;H0YL11	Isocitrate dehydrogenase [NADP], mitochondrial	9	9	22.3	22.3	50.909	0	13.482	215440000	50	3.20057	-4.77043		NaN	1	0		0.262669	0.781407	0.469179		3.17791	0.00249724	-2.31396		2.57119	0.00868293	-2.12964		0.524151	0.536483	-0.419892
INA	Q16352;P07196;P12036	Q16352	Alpha-internexin	18	17	36.7	35.1	55.39	0	29.073	275010000	80	4.28235	-4.8834		1.03502	0.0869553	-2.3429		0.819901	0.481731	1.2576		NaN	1	0		4.80802	0.000264151	-3.16101		NaN	1	0
ANK2	A0A5F9ZHS1;A0A5F9ZGX3;Q01484;A0A5F9ZHD2;E9PHW9;A0A5F9ZI65;A0A5F9ZHN5;A0A5F9ZGY1;A0A5F9ZI81;A0A5F9ZI40;A0A5F9ZHQ5;A0A5F9ZGS7;A0A5F9ZI15;A0A5F9ZHJ6;A0A5F9ZH39;A0A5F9ZI56;A0A5F9ZH19;A0A5F9ZGZ1;I6L894;A0A5F9ZI30;A0A5F9ZGY4;A0A5F9ZGY3;A0A5F9ZHR8;D6RHE1;A0A5F9ZHE4;A0A5F9ZH30;A0A5F9ZGZ5;A0A0U1RQN6;A0A5F9ZHF7;A0A5F9ZHT4;A0A5F9ZHT8;A0A5F9ZI46;A0A5F9ZHL5;A0A5F9ZGS5;A0A5F9ZH70;A0A5F9ZI18;A0A5F9ZHG3;A0A5F9ZH…	A0A5F9ZHS1;A0A5F9ZGX3;Q01484;A0A5F9ZHD2;E9PHW9;A0A5F9ZI65;A0A5F9ZHN5;A0A5F9ZGY1;A0A5F9ZI81;A0A5F9ZI40;A0A5F9ZHQ5;A0A5F9ZGS7;A0A5F9ZI15;A0A5F9ZHJ6;A0A5F9ZH39;A0A5F9ZI56;A0A5F9ZH19;A0A5F9ZGZ1;I6L894;A0A5F9ZI30;A0A5F9ZGY4;A0A5F9ZGY3;A0A5F9ZHR8;D6RHE1;A0A5F9ZHE4;A0A5F9ZH30;A0A5F9ZGZ5;A0A0U1RQN6;A0A5F9ZHF7;A0A5F9ZHT4;A0A5F9ZHT8;A0A5F9ZI46;A0A5F9ZHL5;A0A5F9ZGS5;A0A5F9ZH70;A0A5F9ZI18;A0A5F9ZHG3;A0A5F9ZH…	Ankyrin-2	14	14	4.3	4.3	437.09	0	28.418	301110000	54	1.28299	1.0558		0.487997	0.481367	0.804285		0.177831	0.857047	0.200604		NaN	1	0		NaN	1	0		NaN	1	0
SRSF5	Q13243	Q13243	Serine/arginine-rich splicing factor 5	6	6	20.2	20.2	31.263	0	49.828	4965100000	61	1.27017	1.73753		0.335793	0.552896	0.711311		0.761419	0.51331	-1.03191		0.315836	0.551248	0.70156		0.875919	0.186341	1.62838		0.541184	0.532009	0.902767
HSPB1	P04792;F8WE04;C9J3N8	P04792;F8WE04	Heat shock protein beta-1	5	5	34.1	34.1	22.782	0	55.999	242600000	48	1.26907	-1.40593		3.83997	0.00209205	-3.65873		0.0261277	0.981494	-0.0331707		1.28571	0.0654503	-1.21626		1.98546	0.0200266	-2.41986		0.794273	0.399914	-0.743833
SLC25A11	I3L1P8;Q02978	I3L1P8;Q02978	Mitochondrial 2-oxoglutarate/malate carrier protein	17	17	55.1	55.1	32.182	0	75.054	3756800000	171	1.25542	-1.02598		5.07261	0.000679739	-1.2368		0.263052	0.782317	-0.206072		0.561993	0.300589	1.1507		0.245406	0.644399	0.600928		0.00355239	0.993249	-0.00903638
RPL38	P63173;J3KT73;J3QL01;J3KSP2	P63173;J3KT73;J3QL01	60S ribosomal protein L38	6	6	57.1	57.1	8.2178	0	25.946	2913100000	59	1.2348	1.30708		NaN	1	0		2.24783	0.179512	-1.4429		0.316607	0.551207	0.642886		0.96304	0.145542	-1.8049		1.57527	0.171681	-2.01007
HSP90AA1	P07900;Q58FG0	P07900	Heat shock protein HSP 90-alpha	9	9	11.6	11.6	84.659	0	38.571	1724400000	114	1.22815	-1.05089		1.44384	0.0303163	0.796782		0.858568	0.467099	0.575275		0.278037	0.59377	0.65959		0.206462	0.679594	0.58023		0.183168	0.813355	-0.420711
CLTC	A0A087WVQ6;Q00610;J3KS13;P53675;J3KSQ2;K7EJJ5;J3QL20;F5H5N6	A0A087WVQ6;Q00610	Clathrin heavy chain;Clathrin heavy chain 1	22	17	15.4	12.6	192.06	0	62.739	3757700000	222	1.22641	-1.06992		5.8553	0.000737864	-1.72125		0.435322	0.670304	-0.328322		0.672807	0.228162	-1.24936		3.23404	0.00321649	-1.79108		0.145127	0.846329	-0.248769
MRPL16	Q9NX20;E9PI14	Q9NX20;E9PI14	39S ribosomal protein L16, mitochondrial	5	5	19.1	19.1	28.449	0	9.8834	675720000	53	1.20992	1.26473		0.131028	0.699686	0.42182		0.658925	0.546398	-0.96393		1.38773	0.0514251	-1.36351		1.85876	0.0245769	-2.58489		0.446062	0.581763	-0.51897
MRPL32	Q9BYC8	Q9BYC8	39S ribosomal protein L32, mitochondrial	3	3	20.7	20.7	21.405	0	50.909	294980000	16	1.18953	1.07585		0.196504	0.638891	0.333587		0.370755	0.71168	-0.312329		NaN	1	0		NaN	1	0		NaN	1	0
BUB3	O43684;J3QT28;J3QSX4	O43684;J3QT28	Mitotic checkpoint protein BUB3	8	8	27.4	27.4	37.154	0	25.52	636410000	45	1.18553	1.179		0.227361	0.613849	0.52032		0.511681	0.638876	-0.66754		NaN	1	0		NaN	1	0		NaN	1	0
THSD7A	A0A087WY08;Q9UPZ6	A0A087WY08;Q9UPZ6	Thrombospondin type-1 domain-containing protein 7A	9	9	5.8	5.8	185.44	0	33.414	1082000000	60	1.18317	1.07196		0.739235	0.296963	1.12574		0.134021	0.879773	-0.165139		1.98045	0.0143245	-1.46093		0.483075	0.479906	-0.327841		2.94757	0.0314118	1.35169
ZNF616	Q08AN1;Q6ZN19;M0R0F3	Q08AN1	Zinc finger protein 616	5	5	6.9	6.9	90.272	0	6.1322	87654000	12	1.15858	-1.0183		NaN	1	0		2.84808	0.1026	-1.29278		NaN	1	0		NaN	1	0		NaN	1	0
EEF1G	P26641	P26641	Elongation factor 1-gamma	13	13	30.4	30.4	50.118	0	35.369	2097900000	161	1.1226	-0.739623		1.64846	0.0205744	-0.531242		0.181026	0.853946	0.117904		0.623679	0.256988	-0.984489		0.791472	0.245982	-0.863113		0.321665	0.693066	-0.410545
XRN2	Q9H0D6	Q9H0D6	5-3 exoribonuclease 2	6	6	8.9	8.9	108.58	0	24.599	881700000	46	1.10657	0.784324		0.0252134	0.914872	0.0466115		0.297064	0.75522	-0.297624		0.0548816	0.911685	-0.0888933		2.17637	0.0155986	-2.73162		2.36801	0.0694286	-1.87329
UCHL1	D6RE83;P09936;D6R974;D6R956	D6RE83;P09936;D6R974;D6R956	Ubiquitin carboxyl-terminal hydrolase;Ubiquitin carboxyl-terminal hydrolase isozyme L1	2	2	11.6	11.6	23.174	0	5.884	249970000	38	1.09928	-2.37444		1.07198	0.076891	-1.62313		0.0638188	0.933274	0.166917		NaN	1	0		NaN	1	0		NaN	1	0
ZNF48	Q96MX3;A0A087WVT1;E9PJ50	Q96MX3;A0A087WVT1	Zinc finger protein 48	9	7	23.1	17.3	67.819	0	13.152	651020000	37	1.09632	0.820057		0.834375	0.193805	-0.555298		1.20672	0.323671	-0.619416		2.17059	0.0109667	-0.720551		NaN	1	0		3.74777	0.0129231	-1.76712
ACTB	P60709;A0A2R8Y793;G5E9R0;E7EVS6;A0A2R8YGF8;C9JUM1;C9JZR7;C9JTX5;A0A2R8YEA7;Q6S8J3;A5A3E0;A0A2R8YFE2;P0CG38;P0CG39;Q9BYX7;F8WCH0	P60709;A0A2R8Y793	Actin, cytoplasmic 1;Actin, cytoplasmic 1, N-terminally processed	29	1	62.7	4.5	41.736	0	323.31	266250000000	1038	1.09623	-1.48103		4.64878	0.00120455	-1.80064		0.215111	0.826914	-0.280859		3.43665	0.0019759	-2.73279		4.28628	0.000934307	-2.5324		0.116087	0.868066	0.118496
IGFBP5	P24593;C9JXX4	P24593;C9JXX4	Insulin-like growth factor-binding protein 5	4	4	15.1	15.1	30.57	0	9.4057	662900000	18	1.0893	1.29749		NaN	1	0		2.716	0.112	-1.92229		1.0101	0.117396	-1.14199		NaN	1	0		0.854073	0.376331	-0.745728
SNRPE	P62304;A6NHK2	P62304;A6NHK2	Small nuclear ribonucleoprotein E	3	3	29.3	29.3	10.803	0	20.037	363110000	17	1.0801	1.07132		NaN	1	0		3.32919	0.064	-1.82003		NaN	1	0		NaN	1	0		NaN	1	0
PLRG1	O43660;D6RA26;B7Z982	O43660;D6RA26;B7Z982	Pleiotropic regulator 1	4	4	11.9	11.9	57.193	0	67.228	341140000	19	1.07624	0.792368		NaN	1	0		2.77258	0.107826	-1.20883		NaN	1	0		NaN	1	0		NaN	1	0
SLC25A1	P53007;B4DP62	P53007;B4DP62	Tricarboxylate transport protein, mitochondrial	10	10	28	28	34.012	0	17.725	847180000	101	1.07036	-0.521854		5.20428	0.000717241	-1.16241		0.974124	0.409568	-0.331457		1.54177	0.0359231	-1.56994		NaN	1	0		0.0880594	0.896012	0.125064
MRPL20	Q9BYC9;I3L2X1	Q9BYC9;I3L2X1	39S ribosomal protein L20, mitochondrial	4	4	21.5	21.5	17.442	0	10.214	328160000	23	1.06822	0.75964		NaN	1	0		1.95421	0.214	-0.700173		NaN	1	0		NaN	1	0		NaN	1	0
MRPS11	P82912;H0YL99	P82912;H0YL99	28S ribosomal protein S11, mitochondrial	6	6	28.9	28.9	20.616	0	32.842	1555200000	59	1.06539	0.978452		0.174261	0.659273	0.458639		0.480087	0.638487	-0.643808		0.840412	0.163447	-1.6742		1.22295	0.0809499	-1.08535		0.0117133	0.983351	-0.0262204
PHGDH	A0A286YF22;A0A2C9F2M7;O43175;A0A286YFA2;A0A286YFM8;A0A286YFL2;A0A286YER3;A0A286YFC8;A0A286YFB2;A0A286YF34;A0A286YFF3;A0A286YFK5;A0A286YF78;A0A286YFE1	A0A286YF22;A0A2C9F2M7;O43175;A0A286YFA2;A0A286YFM8;A0A286YFL2;A0A286YER3;A0A286YFC8;A0A286YFB2	D-3-phosphoglycerate dehydrogenase	11	11	18.6	18.6	55.938	0	51.341	2442800000	142	1.05784	-1.34581		0.172779	0.660226	-0.455191		0.255285	0.790422	-0.404515		2.37521	0.00819383	-3.11382		1.53622	0.0424419	-2.82332		0.217575	0.800319	-0.427197
HSPD1	P10809;E7EXB4;E7ESH4;C9JL25;C9JCQ4;C9JL19	P10809	60 kDa heat shock protein, mitochondrial	19	19	34.7	34.7	61.054	0	63.317	3377300000	244	1.0572	-1.63393		5.84499	0.000716981	-2.25031		0.0947992	0.907015	-0.152714		1.12533	0.0916335	-3.75155		2.23737	0.0139853	-4.14121		0.123512	0.86704	-0.460817
FMNL2	Q96PY5;C9IZY8;F8W1F5;Q8IVF7;F8VYL1	Q96PY5;C9IZY8	Formin-like protein 2	19	17	17.7	16.2	123.32	0	32.883	1268000000	66	1.04735	1.3383		0.149906	0.679386	0.38716		0.0432966	0.960299	0.0846186		NaN	1	0		0.0963068	0.80319	0.239628		1.52291	0.179864	1.55441
DEK	H0Y993;A0A494C028;P35659;B4DFG0;D6RDA2;H0Y8X0;A0A494C198;D6R9L5	H0Y993;A0A494C028;P35659;B4DFG0;D6RDA2;H0Y8X0;A0A494C198	Protein DEK	8	8	22.9	22.9	43.247	0	19.547	565490000	47	1.04506	0.627804		0.36063	0.541054	0.711021		0.119589	0.88512	-0.16107		NaN	1	0		0.855235	0.197836	-0.951729		0.578579	0.509217	0.606819
SRP9;DKFZp564M2223	P49458;Q6P2S0;Q659G3;E9PE20	P49458;Q6P2S0;Q659G3;E9PE20	Signal recognition particle 9 kDa protein	8	8	68.6	68.6	10.112	0	16.222	2737300000	43	1.03911	2.22256		0.655922	0.376626	1.48		0.164356	0.864159	-0.406696		NaN	1	0		NaN	1	0		NaN	1	0
PWP2	A0A0B4J2E5;Q15269;C9J544;A0A096LPI6	A0A0B4J2E5;Q15269	Periodic tryptophan protein 2 homolog	6	6	7.2	7.2	102.45	0	9.5539	281740000	23	1.03902	-1.25871		NaN	1	0		0.0090526	0.992265	-0.0134792		NaN	1	0		NaN	1	0		NaN	1	0
NME1;NME2;NME1-NME2;NME2P1	E7ERL0;J3KPD9;Q32Q12;P22392;P15531;C9K028;F6XY72;E5RHP0;O60361	E7ERL0;J3KPD9;Q32Q12;P22392;P15531;C9K028;F6XY72;E5RHP0;O60361	Nucleoside diphosphate kinase;Nucleoside diphosphate kinase B;Nucleoside diphosphate kinase A;Putative nucleoside diphosphate kinase	2	2	20.9	20.9	15.261	0	4.4831	201260000	27	1.03708	-1.51105		0.156559	0.675484	-0.364424		0.311503	0.750808	-0.489656		2.67052	0.00501435	-1.82438		NaN	1	0		0.248924	0.767216	-0.25919
RPS18	P62269;A0A0G2JQH2;Q5GGW2;J3JS69	P62269	40S ribosomal protein S18	17	17	62.5	62.5	17.718	0	91.08	40823000000	371	1.03562	-0.66958		3.25401	0.00316846	0.917274		0.738685	0.519423	0.360447		0.420154	0.444371	-0.455971		0.810221	0.231139	-0.354074		0.0161836	0.982985	-0.0168942
RRP8	E9PPY3;O43159	E9PPY3;O43159	Ribosomal RNA-processing protein 8	5	5	23.2	23.2	34.2	0	52.231	1145400000	34	1.03383	0.893874		NaN	1	0		2.1338	0.189224	-1.4965		0.39885	0.463593	-0.461135		0.726666	0.308591	-1.19971		0.717177	0.4282	-0.74363
DCLK1	O15075;Q5VZY9	O15075;Q5VZY9	Serine/threonine-protein kinase DCLK1	9	9	14.2	14.2	82.223	0	26.933	793310000	55	1.02832	-0.679667		0.638134	0.390353	1.07715		0.170637	0.862419	0.17472		0.695305	0.217575	-1.15303		0.591122	0.416397	-0.899348		0.00459305	0.992311	-0.00942177
CKB	P12277;G3V4N7;H0YJG0;G3V2I1;G3V461	P12277;G3V4N7	Creatine kinase B-type	6	6	18.4	18.4	42.644	0	12.155	295550000	41	1.01739	-1.60712		0.204888	0.632948	0.514619		1.44903	0.27535	1.65645		NaN	1	0		NaN	1	0		NaN	1	0
CAPZB	B1AK87;B1AK88;P47756;B1AK85;A0A6I8PRV6	B1AK87;B1AK88;P47756;B1AK85	F-actin-capping protein subunit beta	4	4	20.8	20.8	29.295	0	9.3371	362420000	53	1.00441	-1.74357		0.488977	0.482564	-0.221912		0.555141	0.611851	0.761703		1.93048	0.0155441	-2.30283		NaN	1	0		0.510401	0.542143	-0.673698
SFXN1	Q9H9B4;D6RFI0;D6RDG7;S4R2X2;D6RAE9	Q9H9B4;D6RFI0	Sideroflexin-1	14	14	41	41	35.619	0	35.955	1644900000	155	1.00339	-1.74046		4.75021	0.001	-1.83261		0.0385988	0.96335	0.0729303		1.79439	0.0204128	-3.07259		2.81335	0.00642857	-3.93008		0.588026	0.502529	-1.00539
TRMT10C	Q7L0Y3;C9JVB6	Q7L0Y3;C9JVB6	Mitochondrial ribonuclease P protein 1	11	11	27.8	27.8	47.346	0	18.682	289430000	31	0.994746	-0.854689		NaN	1	0		0.793631	0.498473	-0.652053		NaN	1	0		NaN	1	0		NaN	1	0
GNB1;GNB2;GNB4	P62873;P62879;E7EP32;C9JXA5;C9JZN1;F6X3N5;F6UT28;C9JIS1;B1AKQ8;Q9HAV0;E9PCP0;F5H0S8;F5H100;F5H8J8;P16520;B3KVK2;C9JD14	P62873;P62879;E7EP32;C9JXA5;C9JZN1;F6X3N5;F6UT28;C9JIS1;B1AKQ8;Q9HAV0	Guanine nucleotide-binding protein G(I)/G(S)/G(T) subunit beta-1;Guanine nucleotide-binding protein G(I)/G(S)/G(T) subunit beta-2;Guanine nucleotide-binding protein subunit beta-4	5	5	14.4	14.4	37.377	0	6.2268	252700000	42	0.993342	-1.57587		0.28519	0.579501	-0.856121		0.293021	0.758629	-0.585144		NaN	1	0		NaN	1	0		NaN	1	0
GLTSCR2	Q9NZM5;M0QZ34;M0QZU5;M0QYZ9;M0QX73	Q9NZM5	Glioma tumor suppressor candidate region gene 2 protein	9	9	19.5	19.5	54.389	0	25.473	1620800000	44	0.976457	0.817363		NaN	1	0		0.786408	0.501482	-0.681192		0.468041	0.398214	0.356743		0.847169	0.202353	0.320131		0.210575	0.80126	0.11915
WHSC1	O96028;D6R9V2;H0Y9L4;D6RIS1;H0Y9U6	O96028	Histone-lysine N-methyltransferase NSD2	11	11	9.5	9.5	152.26	0	76.356	1894100000	66	0.97572	0.782679		NaN	1	0		1.38493	0.286836	-0.812981		0.255642	0.622917	-0.276667		0.651811	0.370181	0.228629		0.865698	0.374311	0.508068
PDCD11	Q14690;A0A3B3IUD7;S4R3Q4	Q14690;A0A3B3IUD7	Protein RRP5 homolog	15	15	9.6	9.6	208.7	0	52.02	1893800000	89	0.971669	0.94062		0.145882	0.681349	0.248575		1.31506	0.306417	-0.996492		0.530601	0.331336	0.560788		0.626507	0.388848	0.329582		0.145216	0.847505	0.138618
ZNF768	H3BS42;Q9H5H4;K7ERP0;K7EJE2	H3BS42;Q9H5H4	Zinc finger protein 768	9	8	17.3	15.5	56.668	0	20.285	2005200000	71	0.965794	0.92623		0.499152	0.476665	0.734866		0.447155	0.66043	-0.440724		0.394969	0.467727	-0.617093		0.163018	0.72021	-0.449858		0.0290205	0.966773	0.0619432
RBMXL1	Q96E39;A0A1B0GUK8	Q96E39	RNA binding motif protein, X-linked-like-1	6	6	11.8	11.8	42.141	0	11.468	1000900000	47	0.964886	0.896296		0.923747	0.130776	1.25115		0.0394967	0.962799	0.055681		0.691448	0.219235	-1.4304		0.724547	0.309281	-1.09493		0.123466	0.865838	0.262914
hCG_1984214;MRPS17	I3L0E3;Q9Y2R5;E9PE17	I3L0E3;Q9Y2R5;E9PE17	28S ribosomal protein S17, mitochondrial	3	3	12.9	12.9	25.72	0	12.111	2021800000	32	0.951521	1.30465		NaN	1	0		2.42088	0.158545	-2.07079		0.013003	0.974967	0.0166929		1.6559	0.0336697	-2.03012		3.39793	0.0171429	-2.23831
CFL1	P23528;E9PP50;G3V1A4;E9PK25;E9PQB7;E9PS23;Q9Y281;E9PLJ3	P23528;E9PP50;G3V1A4;E9PK25;E9PQB7;E9PS23	Cofilin-1	10	7	40.4	33.1	18.502	0	23.486	3385300000	112	0.950469	-1.47476		2.17835	0.00921246	-1.35528		0.199783	0.840458	0.303619		1.47523	0.0419561	-3.12791		0.896638	0.176606	-2.39496		0.0673192	0.918383	0.186948
MAP2	A0A669KB77;P11137;H7BZB9;E7EV03	A0A669KB77;P11137	Microtubule-associated protein 2	37	37	17.3	17.3	216.9	0	211.84	8906300000	223	0.947469	-1.69456		0.140526	0.687658	-0.276028		0.538639	0.615039	0.870051		1.546	0.036	-0.994935		1.14548	0.0951157	1.49695		1.38427	0.220568	0.876597
SERBP1	Q8NC51	Q8NC51	Plasminogen activator inhibitor 1 RNA-binding protein	13	13	32.4	32.4	44.965	0	106.95	5275600000	137	0.945805	-1.46115		0.911893	0.137088	1.43256		1.45475	0.276694	1.37882		0.791135	0.179991	-0.175654		1.01689	0.125936	-1.00601		1.79072	0.135888	-0.715717
TRIM3	A0A1W2PPI7;O75382;A0A0J9YY97;E9PMK8	A0A1W2PPI7;O75382	Tripartite motif-containing protein 3	9	8	14.9	13.5	76.13	0	16.842	427900000	29	0.938583	0.690491		0.362556	0.540652	0.415929		1.21193	0.326347	-0.557175		NaN	1	0		0.258452	0.635439	-0.234654		2.04982	0.0908506	0.84275
DDX55	F5H5U2;Q8NHQ9	F5H5U2;Q8NHQ9	ATP-dependent RNA helicase DDX55	2	2	4.9	4.9	65.19	0	35.01	72396000	8	0.936688	-1.06605		NaN	1	0		0.417739	0.684	-0.402186		NaN	1	0		NaN	1	0		NaN	1	0
CRMP1	E9PD68;Q14194	E9PD68;Q14194	Dihydropyrimidinase-related protein 1	11	11	22.1	22.1	62.029	0	33.809	1785600000	137	0.930913	-1.06207		3.21081	0.00329078	-1.61314		0.0763421	0.916058	-0.0928414		1.25458	0.0705706	-2.71318		0.0682761	0.853463	0.145825		0.19329	0.808832	0.453089
	A0A1C7CYX9;E5RFU4	A0A1C7CYX9		20	5	33.8	8.9	73.502	0	107.27	6537300000	260	0.930667	-1.04122		1.25275	0.0467745	-0.797727		0.0868348	0.905482	0.107264		0.556418	0.305606	-1.1526		0.0110324	0.970936	-0.0231905		0.124073	0.868681	-0.229231
SLC25A22;SLC25A18	Q9H936;E9PJH7;A0A0D9SFE1;A0A0D9SEI9;K4DIB3;K4DIA8;K4DIB8;K4DIB6;E9PI74;E9PQ36;A0A0D9SG84;K4DIA2;K4DIB0;E9PS95;A0A0D9SFA8;Q9H1K4;E9PJY0;A0A0A6YYN8;K4DIB4	Q9H936;E9PJH7;A0A0D9SFE1;A0A0D9SEI9;K4DIB3;K4DIA8;K4DIB8;K4DIB6;E9PI74;E9PQ36;A0A0D9SG84;K4DIA2;K4DIB0;E9PS95;A0A0D9SFA8;Q9H1K4	Mitochondrial glutamate carrier 1;Mitochondrial glutamate carrier 2	7	7	20.1	20.1	34.47	0	12.842	354490000	87	0.916622	-1.78423		3.52265	0.00262642	-0.886806		0.487626	0.646637	0.7465		1.21594	0.0767374	-1.81245		NaN	1	0		0.75882	0.407235	-0.915302
RAB5C;RAB5B	K7ERI8;K7ERQ8;P51148;F8VVZ0;F8VUA5;F8VVK3;K7ENY4;P61020;F8WCY6;F8WD79;F8VPW9;F8VSF8;F8VWZ7;F8VWU4	K7ERI8;K7ERQ8;P51148;F8VVZ0;F8VUA5;F8VVK3;K7ENY4;P61020	Ras-related protein Rab-5C;Ras-related protein Rab-5B	3	1	21.7	8.7	17.852	0	5.1211	53319000	25	0.885746	-1.1295		1.39714	0.0338182	-1.14966		0.371879	0.711426	-0.414482		NaN	1	0		NaN	1	0		NaN	1	0
GTF3C1	Q12789;H3BU55;H3BRD0;I3L1Z3;H3BU37	Q12789	General transcription factor 3C polypeptide 1	18	18	8.7	8.7	238.87	0	32.988	954640000	67	0.875602	0.907226		0.587433	0.42702	0.629659		0.607027	0.570039	-0.466505		1.12162	0.0922924	-0.818127		0.510403	0.464588	-0.596756		0.304106	0.704481	0.246782
ATP5C1	P36542	P36542	ATP synthase subunit gamma, mitochondrial	12	12	35.9	35.9	32.996	0	49.023	5562500000	221	0.872402	-0.885526		5.39491	0.000781955	-1.86317		0.105166	0.897239	-0.106883		1.01871	0.115176	0.522314		0.0337164	0.925108	-0.041441		4.641	0.0025	-0.91971
MAP1B	P46821;D6RA32;D6RA40;D6RGJ3;D6RCL2	P46821	Microtubule-associated protein 1B;MAP1B heavy chain;MAP1 light chain LC1	55	54	24	23.6	270.63	0	323.31	42463000000	722	0.857097	-0.23946		0.0563771	0.831251	-0.0439698		1.14697	0.343341	0.35652		0.422939	0.443318	-0.251513		0.781487	0.254216	0.174301		0.100799	0.883745	-0.0517535
TMPO	P42167;G5E972;H0YJH7;P42166	P42167;G5E972;H0YJH7	Lamina-associated polypeptide 2, isoforms beta/gamma;Thymopoietin;Thymopentin	7	7	19.6	19.6	50.67	0	19.594	1215300000	67	0.854812	-0.552653		0.155338	0.675953	-0.197792		1.44595	0.272448	-0.788898		0.141272	0.788475	-0.193721		0.0720114	0.847295	0.0648651		0.0253526	0.970801	-0.0279115
CYFIP2	H7C229;E7EVJ5;E7EW33;Q96F07;H0YL50;A0A0G2JRX2;A0A087WU52;A0A0G2JRV9;A0A087WWL1;A0A087WVE1;A0A087WTQ3;A0A087WWZ1	H7C229;E7EVJ5;E7EW33;Q96F07	Cytoplasmic FMR1-interacting protein 2	3	3	3	3	129.7	0	8.2166	168510000	23	0.852454	-1.14059		0.390066	0.526556	0.880841		1.47932	0.275931	1.62312		2.13631	0.0113959	-1.94411		NaN	1	0		0.295274	0.714559	-0.306447
RPS21	Q8WVC2;P63220;Q9BYK1;Q9BYK2	Q8WVC2;P63220;Q9BYK1	40S ribosomal protein S21	5	5	55.6	55.6	8.85	0	20.603	307160000	49	0.837619	0.858401		1.84706	0.0134016	-1.99068		0.218235	0.825979	-0.237232		2.00692	0.0140232	-2.27556		2.49952	0.00965737	-2.56218		NaN	1	0
HNRNPK	Q5T6W2	Q5T6W2		2	2	3.4	3.4	41.807	0	5.8778	1463100000	32	0.823666	1.50547		NaN	1	0		0.735692	0.519467	-0.960055		NaN	1	0		1.17933	0.0878026	-1.62552		1.59248	0.16997	1.13413
MMTAG2	Q9BU76	Q9BU76	Multiple myeloma tumor-associated protein 2	6	6	27	27	29.411	0	22.761	879380000	41	0.820719	0.668868		NaN	1	0		1.95034	0.211344	-0.837755		1.12838	0.0913491	-0.99813		1.02757	0.12237	-0.55291		2.60825	0.0491915	1.28984
MRPL23	Q16540;A6NJD9;A8MVT4;A8MYK1;H7C2P7	Q16540;A6NJD9;A8MVT4;A8MYK1;H7C2P7	39S ribosomal protein L23, mitochondrial	5	5	40.5	40.5	17.781	0	13.98	2014300000	42	0.817876	1.62957		0.343715	0.548699	0.842015		0.581487	0.58707	-1.05161		0.782221	0.181455	-1.00487		0.453523	0.501957	-0.660845		0.0181296	0.981335	-0.0306598
UPF3B	Q9BZI7;A0A087WYC8;A0A1B0GVA2	Q9BZI7;A0A087WYC8	Regulator of nonsense transcripts 3B	9	9	22.8	22.8	57.761	0	36.26	1075700000	39	0.808193	0.664282		NaN	1	0		1.75486	0.227854	-0.9204		0.776393	0.18354	-0.683426		0.787572	0.249233	-1.18859		0.680315	0.450976	-0.687997
GLYR1	Q49A26;K7EMM8;K7EQB2;K7ELL0;K7EPU6	Q49A26;K7EMM8;K7EQB2	Putative oxidoreductase GLYR1	12	12	21.2	21.2	60.547	0	71.263	2641500000	80	0.804276	1.34731		0.519023	0.466351	0.783636		0.741531	0.519649	-0.970172		0.210446	0.683375	0.407277		0.25199	0.6399	-0.619945		0.0563561	0.931864	-0.120332
ETHE1	M0QXB5;O95571;M0QY80;M0QX80	M0QXB5;O95571;M0QY80	Persulfide dioxygenase ETHE1, mitochondrial	5	5	23.5	23.5	28.444	0	9.0482	140080000	53	0.798157	-1.92841		2.20185	0.00905682	-2.62673		0.0709233	0.922836	-0.179258		3.55425	0.00166667	-3.00202		3.01903	0.00464455	-2.96972		NaN	1	0
ATP5F1	Q5QNZ2;P24539	Q5QNZ2;P24539	ATP synthase F(0) complex subunit B1, mitochondrial	6	6	29.7	29.7	22.275	0	38.085	405910000	55	0.784543	-1.76727		2.22548	0.00893447	-2.27844		0.0880834	0.90548	-0.18916		2.14668	0.0112922	-1.32926		NaN	1	0		1.53341	0.180727	-0.933152
NIFK	Q9BYG3;C9J808;C9J6C5;H7BZL0	Q9BYG3;C9J808;C9J6C5	MKI67 FHA domain-interacting nucleolar phosphoprotein	11	11	29.4	29.4	34.222	0	78.742	3581300000	97	0.769359	1.18941		0.464432	0.492756	0.722036		0.948043	0.423526	-1.10019		0.040941	0.927774	0.107634		0.508318	0.465413	0.684915		0.186338	0.8092	0.33582
ZC2HC1A	Q96GY0;H0YAP0	Q96GY0;H0YAP0	Zinc finger C2HC domain-containing protein 1A	15	15	38.8	38.8	35.092	0	31.347	3591100000	97	0.757999	1.86298		0.926934	0.129772	1.87568		0.161609	0.860859	-0.418647		1.35204	0.0557108	-1.3806		0.322405	0.588566	0.678541		1.60062	0.168481	1.60395
SLIT1	Q5T0V0;O75093;Q5T0V4;Q5T0V2	Q5T0V0;O75093;Q5T0V4	Slit homolog 1 protein	11	10	8.8	8	159.66	0	46.179	311520000	28	0.754986	0.72246		0.943374	0.12352	0.923424		0.824198	0.479086	-0.620656		NaN	1	0		NaN	1	0		NaN	1	0
PHB	C9JZ20;E7ESE2;E9PCW0;C9JW96;P35232;D6RBK0	C9JZ20;E7ESE2;E9PCW0;C9JW96;P35232;D6RBK0	Prohibitin	8	8	40.8	40.8	22.27	0	13.041	473710000	56	0.75243	-1.78375		1.18998	0.0541553	-1.75233		0.0870821	0.906199	-0.181012		NaN	1	0		NaN	1	0		NaN	1	0
PAK1IP1	Q9NWT1	Q9NWT1	p21-activated protein kinase-interacting protein 1	8	8	19.1	19.1	43.963	0	11.599	582600000	36	0.7487	0.569401		0.0766212	0.78167	0.09753		0.641183	0.56115	-0.424164		NaN	1	0		0.651681	0.369689	-1.00547		1.57785	0.173118	1.46978
NFIB	A0A1B0GW37;A0A1B0GU97;A0A1B0GWJ4;U3KQE8;A0A1B0GWI9;Q5VW27;A0A0A0MRX8;Q5VW30;Q5VW26;O00712;A0A2R8Y7V8;A0A1B0GTC1;A0A1B0GVN4;U3KPY9;Q5W0Y9;A0A1B0GWB8;A0A087WXP2;A0A286YEX4;S4R308;K7EN08;K7ESG9;C9JWJ8;K7EJB0;K7EKH0;Q14938;P08651	A0A1B0GW37;A0A1B0GU97;A0A1B0GWJ4;U3KQE8;A0A1B0GWI9;Q5VW27;A0A0A0MRX8;Q5VW30;Q5VW26;O00712;A0A2R8Y7V8;A0A1B0GTC1;A0A1B0GVN4;U3KPY9;Q5W0Y9;A0A1B0GWB8;A0A087WXP2	Nuclear factor 1;Nuclear factor 1 B-type	4	3	11.7	9	46.404	0	7.7724	676290000	47	0.744094	0.597192		1.95626	0.0120329	0.971966		0.292113	0.758471	0.202036		NaN	1	0		1.42924	0.0520784	-1.57036		0.217787	0.801252	0.37922
MAPT	I3L170;A0A0G2JQJ7;A0A0G2JPD5;A0A0G2JS76;A0A0G2JMX7;P10636	I3L170;A0A0G2JQJ7;A0A0G2JPD5;A0A0G2JS76;A0A0G2JMX7;P10636	Microtubule-associated protein;Microtubule-associated protein tau	5	5	18.5	18.5	35.671	0	7.2885	266830000	20	0.74337	-1.13208		0.0296721	0.902354	0.0628112		0.214667	0.826134	0.315173		1.96791	0.0146617	-2.05628		NaN	1	0		0.12536	0.868849	0.154292
CAPZA2	P47755;C9JUG7;F8W9N7;A0A0D9SET8	P47755;C9JUG7;F8W9N7;A0A0D9SET8	F-actin-capping protein subunit alpha-2	4	3	16.4	12.9	32.949	0	14.328	534850000	52	0.731948	-0.725959		3.20441	0.00327915	-1.54129		0.192354	0.845148	-0.176989		NaN	1	0		NaN	1	0		NaN	1	0
SFRP1	Q8N474;Q6ZSL4	Q8N474;Q6ZSL4	Secreted frizzled-related protein 1	7	7	20.7	20.7	35.385	0	15.246	2914700000	54	0.731702	1.69551		0.198702	0.637271	0.482004		0.129855	0.879025	-0.308362		1.62571	0.0299329	-1.44869		1.44701	0.0501408	-1.21462		0.321754	0.694288	-0.314151
RBM42	K7EP90;Q9BTD8;K7EQ03;K7EML2;K7ER08	K7EP90;Q9BTD8;K7EQ03;K7EML2;K7ER08	RNA-binding protein 42	4	4	13.3	13.3	48.024	0	19.54	629820000	27	0.725504	0.515957		NaN	1	0		2.15658	0.188085	-0.691849		1.27701	0.0665159	-1.53861		3.20099	0.00349239	-2.18859		0.319608	0.692632	-0.380101
SEMA3C	Q99985	Q99985	Semaphorin-3C	10	10	15.6	15.6	85.206	0	23.965	1245500000	60	0.722865	1.25508		2.66211	0.00572289	0.935082		0.551031	0.608598	-0.687891		1.0036	0.118595	-1.24158		0.911594	0.16874	-1.36791		0.190923	0.810322	-0.278955
DNAJB6;DNAJB8	C9J2C4;A0A0J9YX62;O75190;C9JB42;C9JDR7;C9JDX6;F8WCZ4;C9J2P2;E9PH18;Q8NHS0;C9JN01;Q8WWF6	C9J2C4;A0A0J9YX62;O75190;C9JB42;C9JDR7;C9JDX6;F8WCZ4;C9J2P2;E9PH18;Q8NHS0	DnaJ homolog subfamily B member 6;DnaJ homolog subfamily B member 8	4	3	18.4	14	25.377	0	8.3008	192740000	42	0.719906	-0.793001		1.13131	0.0640288	-1.38567		0.44822	0.660477	0.440202		2.35153	0.00836522	-1.99577		NaN	1	0		0.693765	0.440217	-0.577052
SEMA3A	Q14563;C9J9C4	Q14563	Semaphorin-3A	6	6	9.7	9.7	88.888	0	20.242	80460000	10	0.718599	0.796615		NaN	1	0		1.21691	0.327079	-0.927095		NaN	1	0		NaN	1	0		NaN	1	0
CKAP5	Q14008;H0YDX5;E9PQH5	Q14008	Cytoskeleton-associated protein 5	11	11	6.8	6.8	225.49	0	39.234	224840000	42	0.713351	-0.630095		NaN	1	0		0.59434	0.577377	-0.459533		2.55749	0.00625688	-2.05553		NaN	1	0		0.156178	0.838696	0.148691
PBRM1	Q86U86;E7EVG2;H0Y5B5;C9JPI5;C9JQF1;C9J053	Q86U86;E7EVG2;H0Y5B5	Protein polybromo-1	21	21	13.9	13.9	192.95	0	44.306	1501300000	82	0.713158	0.521634		0.0490999	0.849158	0.0472797		1.15788	0.341207	-0.583617		0.120991	0.815408	-0.167152		0.352933	0.570811	-0.20074		0.260678	0.751484	0.22244
RBM19	Q9Y4C8;H0YIL2	Q9Y4C8	Probable RNA-binding protein 19	14	14	17	17	107.33	0	79.566	1980100000	76	0.709484	0.744442		NaN	1	0		1.42798	0.27575	-0.988506		0.0850909	0.865386	-0.156094		0.195181	0.685959	-0.318511		0.086266	0.897083	-0.132297
STT3B	Q8TCJ2	Q8TCJ2	Dolichyl-diphosphooligosaccharide--protein glycosyltransferase subunit STT3B	6	6	7.1	7.1	93.673	0	18.227	2037100000	54	0.708206	-0.532255		0.241252	0.604615	-0.247654		0.126122	0.880888	0.100648		0.447403	0.417491	0.682412		0.641528	0.377766	0.341838		0.44609	0.582933	-0.467981
SFXN3	Q9BWM7;A0A1P0AYU5;S4R3N9	Q9BWM7;A0A1P0AYU5;S4R3N9	Sideroflexin-3	11	11	40.5	40.5	35.503	0	32.29	750840000	107	0.707353	-0.644685		1.83397	0.0137219	-2.87381		1.39122	0.288091	-1.32026		NaN	1	0		0.12172	0.775276	-0.335876		2.24101	0.0805714	1.99306
CBX5	P45973;F8VNY3	P45973	Chromobox protein homolog 5	5	5	22.5	22.5	22.225	0	20.828	892960000	37	0.696147	0.705288		0.119963	0.714642	-0.241357		0.352001	0.728729	-0.420223		1.74468	0.0225734	-1.34198		NaN	1	0		2.28182	0.0774667	-1.15106
MRPS10	P82664	P82664	28S ribosomal protein S10, mitochondrial	4	4	22.9	22.9	22.999	0	12.345	732930000	31	0.695254	0.585536		NaN	1	0		1.51357	0.262632	-0.810382		NaN	1	0		NaN	1	0		NaN	1	0
IK	Q13123;D6REL4;E7EQZ7	Q13123;D6REL4;E7EQZ7	Protein Red	5	5	9.5	9.5	65.601	0	8.5253	550350000	39	0.689919	-0.65765		0.384744	0.527405	-0.469219		0.0559266	0.940625	-0.0610129		1.49296	0.0401519	-1.01028		1.82408	0.025727	-1.81923		0.919285	0.361662	-0.676256
ZFP91;ZFP91-CNTF	Q96JP5;A0A0A6YYC7;H3BTR0	Q96JP5;A0A0A6YYC7;H3BTR0	E3 ubiquitin-protein ligase ZFP91	6	6	14.7	14.7	63.444	0	87.461	2142300000	56	0.687178	1.01079		0.0880491	0.761469	-0.202039		0.196581	0.84163	-0.316297		0.545009	0.317472	-0.864078		0.21628	0.672239	0.547098		0.410466	0.606333	0.681132
SRFBP1	Q8NEF9	Q8NEF9	Serum response factor-binding protein 1	4	4	11	11	48.633	0	12.159	565670000	27	0.680118	-0.629575		0.119205	0.714744	-0.0828905		0.0720427	0.921928	0.0574783		0.686488	0.220498	-0.711172		1.55916	0.0416842	-1.64222		0.531652	0.532874	-0.490591
KIAA0020	Q15397;S4R3K8	Q15397	Pumilio domain-containing protein KIAA0020	15	15	27.2	27.2	73.584	0	85.528	1766400000	79	0.670987	1.12802		0.332427	0.552199	0.634437		0.559576	0.610853	-0.757449		1.1075	0.0952124	-0.998409		0.299366	0.600212	0.328545		1.12398	0.294168	0.774552
RPS29	A0A2R8Y851;P62273	A0A2R8Y851;P62273	40S ribosomal protein S29	1	1	12.6	12.6	10.256	0	3.472	1532400000	37	0.670853	1.46228		0.332996	0.55293	0.980915		0.332502	0.735006	-0.763917		1.15598	0.0871978	-1.20754		NaN	1	0		0.361402	0.65344	-0.3524
SLC25A12	O75746	O75746	Calcium-binding mitochondrial carrier protein Aralar1	9	6	15.2	10.9	74.761	0	21.366	380090000	59	0.670485	-1.30285		1.34904	0.0367605	-0.810225		0.723312	0.524813	0.961243		NaN	1	0		NaN	1	0		NaN	1	0
MAP4K4;MINK1	C9J840;E7EX83;A0A0D9SG62;H7C0P6;E7ENQ1;G3XAA2;H7C360;G5E948;E7EN19;A0A0D9SEY1;O95819;Q8N4C8;I3L1U1;H7C3Z6	C9J840;E7EX83;A0A0D9SG62;H7C0P6;E7ENQ1;G3XAA2;H7C360;G5E948;E7EN19;A0A0D9SEY1;O95819;Q8N4C8	Mitogen-activated protein kinase kinase kinase kinase 4;Misshapen-like kinase 1	10	5	11.1	6.7	113.56	0	27.047	628560000	39	0.662523	0.854706		0.443368	0.500339	0.757081		0.28277	0.767419	0.386643		NaN	1	0		NaN	1	0		NaN	1	0
TCP1	P17987;E7ERF2;E7EQR6;F5H282;F5GZI8;F5GZ03;F5GYL4;F5H726;F5H676;F5H136	P17987;E7ERF2;E7EQR6;F5H282	T-complex protein 1 subunit alpha	13	13	24.8	24.8	60.343	0	25.369	1490200000	162	0.657612	-0.699588		0.495246	0.479502	-0.669673		0.0126253	0.990231	-0.0183004		0.850774	0.16	-1.49796		1.41514	0.0534556	-0.785975		0.614762	0.484481	0.804776
EXOSC1	Q9Y3B2;B1AMU7;B1AMU3;R4GMQ7;B1AMU4;R4GNH9	Q9Y3B2;B1AMU7;B1AMU3;R4GMQ7;B1AMU4	Exosome complex component CSL4	4	4	22.6	22.6	21.452	0	9.7297	799030000	28	0.645781	0.637424		NaN	1	0		1.24926	0.319519	-0.701667		1.14126	0.0893973	-1.71385		1.20927	0.082534	-1.47929		0.274732	0.733675	-0.442566
BUD31	P41223	P41223	Protein BUD31 homolog	2	2	14.6	14.6	17	0	3.9525	46806000	12	0.641868	-0.979312		NaN	1	0		0.489122	0.645932	0.559265		NaN	1	0		NaN	1	0		NaN	1	0
RPL39P5;RPL39	Q59GN2;P62891	Q59GN2;P62891	Putative 60S ribosomal protein L39-like 5;60S ribosomal protein L39	2	2	23.5	23.5	6.3225	0	3.5677	8821800000	48	0.641121	1.7504		0.267669	0.587513	1.14267		0.0988362	0.903616	-0.35309		0.100134	0.843906	-0.345838		0.424074	0.519296	1.37034		1.0444	0.315274	2.17586
NUMA1	Q14980;A0A087WY61;H0YFY6;K4DIE0;F5H6Y5;F5H4J1	Q14980;A0A087WY61;H0YFY6	Nuclear mitotic apparatus protein 1	22	22	13.1	13.1	238.26	0	71.473	2224500000	126	0.631969	0.77453		0.488858	0.48163	0.712605		0.688093	0.533086	0.704394		0.503662	0.358075	0.332485		0.864204	0.192796	0.617058		0.477648	0.561505	-0.279702
GTF3C4	Q9UKN8	Q9UKN8	General transcription factor 3C polypeptide 4	6	6	7.2	7.2	91.981	0	9.0825	184650000	22	0.63187	0.436388		NaN	1	0		0.398003	0.693843	-0.357515		NaN	1	0		NaN	1	0		NaN	1	0
BRIX1	Q8TDN6	Q8TDN6	Ribosome biogenesis protein BRX1 homolog	8	8	26.1	26.1	41.401	0	31.223	4188000000	47	0.630676	1.02292		NaN	1	0		1.84057	0.229739	-1.72246		0.249742	0.628522	0.564023		0.685276	0.3452	1.02948		0.172729	0.817904	0.33224
U2AF1	P0DN76;Q01081;K7EJH3;A0A1B0GW87;K7EJM7;M0QYK5;M0R2N4;Q8WU68	P0DN76;Q01081	Splicing factor U2AF 35 kDa subunit	6	6	25.8	25.8	27.872	0	26.996	3348900000	59	0.62299	1.26703		0.307819	0.566277	0.973813		0.482292	0.644787	-1.01389		0.168169	0.749848	-0.504019		0.534099	0.449229	-0.961751		1.21479	0.272868	-1.79791
RBM14	Q96PK6;A0A0A6YYI9;F8WDX3;A0A0A0MSL8;B8ZZ74	Q96PK6	RNA-binding protein 14	18	18	28.8	28.8	69.491	0	57.228	5518900000	174	0.615976	-0.904403		0.939725	0.124892	-1.31426		0.396573	0.691171	-0.556636		0.16596	0.752941	-0.392743		0.120098	0.777327	-0.174968		0.594658	0.497645	0.763946
HSPA5	P11021	P11021	78 kDa glucose-regulated protein	22	22	37	37	72.332	0	128.34	3768200000	222	0.603559	-0.419454		2.40625	0.00765882	-1.13448		0.159974	0.861131	-0.110721		0.029667	0.948275	-0.0379793		1.24352	0.0776747	-1.93222		1.71141	0.145133	-1.4824
MRPL40	Q9NQ50	Q9NQ50	39S ribosomal protein L40, mitochondrial	9	9	45.6	45.6	24.49	0	20.83	1972200000	69	0.590837	1.06802		0.424236	0.511409	0.737872		0.168115	0.863073	-0.310941		0.346903	0.518856	0.414449		1.38005	0.0575495	-0.962158		3.32685	0.0187826	-1.77699
MRTO4	Q9UKD2	Q9UKD2	mRNA turnover protein 4 homolog	8	8	31	31	27.56	0	18.77	2080700000	53	0.587054	0.818729		NaN	1	0		1.42604	0.274791	-1.20625		0.407009	0.456898	0.69312		1.09021	0.107426	-2.10855		2.03393	0.0925393	-2.3532
PATZ1	Q9HBE1;J3QSH4;Q14119	Q9HBE1	POZ-, AT hook-, and zinc finger-containing protein 1	6	5	9	8	74.059	0	10.279	1010200000	34	0.569583	-0.618366		0.768014	0.265782	0.67198		0.507447	0.638306	-0.414001		1.2654	0.0685549	-1.18016		1.66108	0.0334985	-2.0324		0.3264	0.689741	-0.382514
	A0A140T9L0;A0A0G2JJL1	A0A140T9L0;A0A0G2JJL1		1	1	6.8	6.8	35.759	0	16.562	187480000	16	0.563571	-0.8135		NaN	1	0		0.898166	0.448846	-0.841962		0.743582	0.195406	-0.721054		2.33685	0.0115472	-2.3259		2.89476	0.0313514	-1.44611
EIF4A1	P60842;J3KT12;J3QL43;J3QS69;J3QR64;J3KSZ0;J3KTB5;J3QLN6;J3QKZ9;J3KS25;J3KTN0;J3QL52	P60842;J3KT12;J3QL43;J3QS69;J3QR64;J3KSZ0;J3KTB5;J3QLN6	Eukaryotic initiation factor 4A-I	9	4	27.1	14	46.153	0	23.303	427160000	77	0.562342	0.919998		4.63261	0.00119101	-1.2956		0.324963	0.737814	-0.382059		1.01949	0.115294	-1.0733		NaN	1	0		2.86619	0.0315897	-1.71761
ARHGEF2	Q92974;V9GYM8;A0A5F9ZI21;V9GYG5;V9GZ14;V9GYF0;Q5VY93;V9GYF5;REV__A0A286YES2;REV__O14715;REV__J3KNE0;REV__A6NKT7;REV__F8VYC4;V9GZ58;REV__P0DJD1;REV__A0A1W2PNU4;REV__P0DJD0;REV__Q99666;REV__J3KQ37	Q92974;V9GYM8;A0A5F9ZI21	Rho guanine nucleotide exchange factor 2	11	11	13.6	13.6	111.54	0	64.395	681690000	44	0.561639	0.521854		0.257252	0.594036	-0.416835		1.15097	0.342541	-0.810728		1.17698	0.0838137	-1.25086		0.10107	0.798678	0.217086		1.19611	0.274714	1.15176
FMR1	Q06787	Q06787	Fragile X mental retardation protein 1	2	2	3.2	3.2	71.174	0	5.4601	948590000	25	0.551847	0.754691		NaN	1	0		1.29936	0.30917	-1.10052		NaN	1	0		NaN	1	0		NaN	1	0
RNMTL1	Q9HC36;I3L0T6;I3L443	Q9HC36;I3L0T6	rRNA methyltransferase 3, mitochondrial	4	4	10.5	10.5	47.019	0	11.561	849820000	22	0.550986	0.641851		NaN	1	0		2.0252	0.196912	-1.33921		1.12845	0.0918206	-1.66868		NaN	1	0		0.0444034	0.947165	-0.0752568
FLII	Q13045;J3KS39;J3KS54	Q13045	Protein flightless-1 homolog	4	4	3.5	3.5	144.75	0	10.639	116850000	20	0.547308	-1.43917		NaN	1	0		0.338408	0.734491	0.681383		2.04673	0.0130667	-2.22273		NaN	1	0		0.105006	0.880966	-0.176585
PTN	P21246;C9JR52	P21246;C9JR52	Pleiotrophin	2	2	16.1	16.1	18.942	0	4.9638	7466900000	37	0.540492	-1.85001		NaN	1	0		0.603646	0.571317	-1.06198		0.148818	0.776465	-0.627118		0.174284	0.707027	-0.669263		0.0151897	0.98125	0.0610936
ZNF384	Q8TF68;E9PHB3;F5H8L7;F5H105	Q8TF68;E9PHB3	Zinc finger protein 384	4	4	10.6	10.6	63.218	0	27.22	1151800000	29	0.536469	-1.03546		0.0220929	0.923348	0.0359828		0.00769486	0.98969	-0.015146		0.106035	0.83684	-0.120813		0.301795	0.600228	-0.485053		0.485196	0.556078	-0.452698
DDX31	F8WAJ0;Q9H8H2	F8WAJ0;Q9H8H2	Probable ATP-dependent RNA helicase DDX31	7	7	10.7	10.7	83.515	0	20.798	531950000	40	0.534944	0.617991		0.502916	0.475254	-0.444032		0.0585945	0.939001	0.0490808		3.35419	0.00216279	-1.61913		3.01976	0.00466667	-1.52879		0.124451	0.86921	-0.0837315
PRDX3	P30048	P30048	Thioredoxin-dependent peroxide reductase, mitochondrial	3	3	14.5	14.5	27.692	0	4.6296	56952000	16	0.527698	-1.28466		NaN	1	0		0.188327	0.847802	0.396853		NaN	1	0		NaN	1	0		NaN	1	0
EXOSC10	Q01780;K7EJ37	Q01780	Exosome component 10	16	16	22.4	22.4	100.83	0	33.809	2198800000	74	0.52485	0.761718		NaN	1	0		1.95934	0.215322	-1.33247		0.115935	0.822748	0.232604		0.222956	0.666226	0.328562		0.686946	0.445665	0.797061
MEX3A	A1L020;M9T4I7;S4R446;Q6ZN04;Q86XN8;Q5U5Q3	A1L020	RNA-binding protein MEX3A	9	9	27.7	27.7	54.173	0	113.56	1946700000	73	0.524279	0.872296		1.15574	0.059441	0.992821		0.191568	0.84516	-0.286951		0.164752	0.754065	-0.229089		0.0608724	0.866754	0.0982059		0.0170309	0.982311	0.0229981
FAM120C	F8W881;Q9NX05	F8W881;Q9NX05	Constitutive coactivator of PPAR-gamma-like protein 2	11	11	14.6	14.6	99.351	0	29.43	303380000	26	0.521312	0.532114		NaN	1	0		2.27437	0.179897	-1.25458		NaN	1	0		NaN	1	0		NaN	1	0
USMG5	Q96IX5	Q96IX5	Up-regulated during skeletal muscle growth protein 5	3	3	44.8	44.8	6.4575	0	6.4196	434150000	40	0.520113	-1.00975		0.304407	0.567825	0.458851		0.640335	0.560444	-0.829962		2.03113	0.0135	-1.45838		NaN	1	0		0.790012	0.399853	-0.602761
RAN	B5MDF5;P62826;J3KQE5;F5H018;H0YFC6;B4DV51;A0A087X0W0	B5MDF5;P62826;J3KQE5;F5H018;H0YFC6	GTP-binding nuclear protein Ran	8	8	24.9	24.9	26.224	0	17.72	3676800000	160	0.509007	-0.8155		1.35499	0.0366154	-0.884864		0.144519	0.874337	-0.208527		1.5446	0.0357814	-2.71267		1.16566	0.0903669	-2.35607		0.432556	0.5927	0.852632
COPA	A0A3B3IT15;P53621;A0A3B3ISC6;A0A3B3IS84;A0A3B3IU89;A0A3B3ITI7;A0A3B3ITV3;A0A3B3ISK1;A0A3B3IU78	A0A3B3IT15;P53621;A0A3B3ISC6;A0A3B3IS84;A0A3B3IU89	Coatomer subunit alpha;Xenin;Proxenin	14	14	13.1	13.1	136.02	0	32.272	1585200000	88	0.508115	-0.518633		0.216688	0.624344	0.357742		0.0165693	0.989657	0.021373		0.688034	0.220451	0.438026		0.000792026	0.997708	-0.000758171		1.70722	0.144328	-0.668135
NOL9	Q5SY16	Q5SY16	Polynucleotide 5-hydroxyl-kinase NOL9	11	11	18.5	18.5	79.322	0	25.545	459280000	44	0.503624	0.545721		0.987829	0.103053	1.28474		0.461966	0.648167	-0.411795		NaN	1	0		NaN	1	0		NaN	1	0
CCT8	P50990;H7C4C8	P50990;H7C4C8	T-complex protein 1 subunit theta	8	8	16.4	16.4	59.62	0	23.436	258050000	51	0.495475	-0.878753		0.164368	0.669251	0.254348		0.233239	0.809695	0.351995		1.09666	0.097	-1.88537		NaN	1	0		0.308456	0.703166	-0.466757
ATP5L	E9PN17;A0A3B3ITX4;O75964;A0A3B3IRW3	E9PN17;A0A3B3ITX4;O75964	ATP synthase subunit g, mitochondrial	4	4	63.2	63.2	8.4518	0	10.785	653360000	65	0.494394	-0.978017		3.07318	0.00382373	-2.07362		0.197663	0.841301	0.287592		NaN	1	0		NaN	1	0		NaN	1	0
SCAF4	O95104	O95104	Splicing factor, arginine/serine-rich 15	3	1	3.1	1.4	125.87	0	4.9738	109960000	16	0.481837	-0.359924		NaN	1	0		0.310537	0.749383	-0.218548		NaN	1	0		NaN	1	0		NaN	1	0
PTBP2	Q9UKA9	Q9UKA9	Polypyrimidine tract-binding protein 2	10	10	24.7	24.7	57.49	0	44.449	896280000	32	0.478964	0.775445		NaN	1	0		2.0591	0.195481	-1.55586		NaN	1	0		1.03523	0.120278	-1.57678		0.333158	0.68472	0.458325
PFN2	C9J712;P35080;C9J0J7;C9JQ45;G5E9Q6;C9J2N0	C9J712;P35080;C9J0J7;C9JQ45;G5E9Q6;C9J2N0	Profilin-2;Profilin	4	4	40.7	40.7	9.7982	0	23.537	492430000	51	0.477551	0.918223		0.589104	0.426691	0.680751		0.663135	0.547976	0.822975		0.30667	0.561389	-0.658038		NaN	1	0		0.76571	0.405912	-1.05396
RNMT	O43148;K7EP06;K7ERH6	O43148;K7EP06	mRNA cap guanine-N7 methyltransferase	8	8	23.1	23.1	54.843	0	17.147	763030000	59	0.474386	-0.584842		0.340682	0.550449	-0.406606		0.217572	0.825671	-0.244107		0.793052	0.179823	-0.901297		1.6969	0.0320612	-1.80276		0.238874	0.776169	-0.28394
NACA	F8W1N5;F8VZJ2;F8VNW4;F8W0W4;H0YHX9;Q13765;E9PAV3;F8VZ58;Q9BZK3	F8W1N5;F8VZJ2;F8VNW4;F8W0W4;H0YHX9;Q13765;E9PAV3	Nascent polypeptide-associated complex subunit alpha;Nascent polypeptide-associated complex subunit alpha, muscle-specific form	3	3	59.2	59.2	7.813	0	46.353	576850000	18	0.472283	0.739009		NaN	1	0		1.2611	0.315718	-1.09739		NaN	1	0		NaN	1	0		NaN	1	0
MRPL14	Q6P1L8	Q6P1L8	39S ribosomal protein L14, mitochondrial	5	5	42.8	42.8	15.947	0	19.283	284150000	33	0.462348	0.565678		0.205146	0.633787	0.369234		1.37143	0.288029	-1.0883		3.69679	0.00136913	-2.40572		NaN	1	0		0.130175	0.866437	-0.113653
HNRNPLL	B7WPG3;C9IYN3;V9GYK2;Q8WVV9;H7C464;C9JJZ7;H7BXH8	B7WPG3;C9IYN3;V9GYK2;Q8WVV9	Heterogeneous nuclear ribonucleoprotein L-like	8	8	23	23	56.45	0	20.359	593660000	38	0.461575	0.590041		0.403624	0.518061	0.583405		0.510079	0.636291	-0.433146		NaN	1	0		NaN	1	0		NaN	1	0
AGO3	Q9H9G7;A0A0U1RR19;Q5TA56	Q9H9G7	Protein argonaute-3	2	2	4.1	4.1	97.359	0	5.5263	12545000	5	0.452806	-1.00748		NaN	1	0		0.0299271	0.976061	0.0619296		NaN	1	0		NaN	1	0		NaN	1	0
KHSRP	A0A087WTP3;Q92945;M0R0I5;M0QYH3;M0QXW7;M0R3J3;E9PEB5;Q96AE4	A0A087WTP3;Q92945;M0R0I5	Far upstream element-binding protein 2	13	12	23.3	22.2	73.027	0	47.507	2143100000	92	0.45189	0.620987		0.0196577	0.929933	0.034482		0.335117	0.733795	-0.390205		0.302732	0.564252	0.638632		0.291961	0.604803	0.64406		0.629703	0.474934	-0.975226
GTF3C5	Q9Y5Q8;Q5T7U1;Q5T7U0;Q5T7U4;H7BY84;H0Y5D2	Q9Y5Q8;Q5T7U1;Q5T7U0;Q5T7U4;H7BY84	General transcription factor 3C polypeptide 5	8	8	18.7	18.7	59.57	0	20.095	258680000	27	0.44722	-0.455524		NaN	1	0		0.602085	0.571473	-0.464003		2.51308	0.00661187	-2.1741		NaN	1	0		0.166166	0.82462	-0.186123
POGZ	Q7Z3K3;M0R2X2;H0YCT3	Q7Z3K3	Pogo transposable element with ZNF domain	10	10	7.7	7.7	155.34	0	44.266	1351400000	69	0.440468	0.406272		0.0247817	0.914682	0.0532732		0.0907283	0.911108	0.0979363		2.12352	0.0114959	-0.627098		0.00919119	0.975579	-0.0242167		1.00278	0.330452	-0.708534
SV2A	Q7L0J3	Q7L0J3	Synaptic vesicle glycoprotein 2A	5	5	8.1	8.1	82.694	0	7.7659	41724000	19	0.439487	-1.09868		2.73673	0.00532919	-1.85544		0.142299	0.873123	0.286616		NaN	1	0		NaN	1	0		NaN	1	0
CBX8	Q9HC52;C9J6K3;C9JM54;B0QXZ6;O95503	Q9HC52	Chromobox protein homolog 8	10	10	32.9	32.9	43.395	0	31.104	1182300000	55	0.423856	0.577872		NaN	1	0		0.878713	0.456161	-0.842732		0.251938	0.628052	-0.29346		0.112	0.785336	0.0754786		0.967976	0.344156	0.594652
ZCCHC17	A0A087WYV3;A0A0D9SEW3;A0A087WXF8;Q9NP64;A0A087WXU5	A0A087WYV3;A0A0D9SEW3;A0A087WXF8;Q9NP64;A0A087WXU5	Nucleolar protein of 40 kDa	5	5	26.3	26.3	20.451	0	30.529	254100000	15	0.417503	0.537753		NaN	1	0		1.18969	0.329503	-0.928854		NaN	1	0		NaN	1	0		NaN	1	0
ZC3H11A	E9PQ61;O75152;E9PBY7;A0A1B0GTU1;A0A494C0C4;A0A1W2PPR9	E9PQ61;O75152;E9PBY7	Zinc finger CCCH domain-containing protein 11A	5	5	10.1	10.1	72.531	0	16.788	312220000	50	0.416966	-0.357691		0.742283	0.293957	-0.449071		0.170723	0.865176	-0.123474		3.02478	0.00292784	-1.15226		NaN	1	0		1.04003	0.31455	-0.463747
FARSA	Q9Y285;K7ER00;K7ER16;K7EPH2;K7ERS0;K7EK06	Q9Y285;K7ER00;K7ER16;K7EPH2	Phenylalanine--tRNA ligase alpha subunit	8	8	15.6	15.6	57.563	0	21.225	797320000	113	0.412861	-0.869012		1.59355	0.0228021	-2.98187		0.130403	0.880683	-0.282449		3.49724	0.00178882	-3.98686		3.55321	0.00251685	-3.7046		0.527091	0.535487	0.646827
BOP1	Q14137;A0A075B729	Q14137;A0A075B729	Ribosome biogenesis protein BOP1	8	8	8.7	8.7	83.629	0	13.436	1620600000	50	0.400022	-0.332958		NaN	1	0		2.38921	0.163765	-0.948341		0.20159	0.697151	0.201297		0.212885	0.673649	0.429438		0.00690635	0.989884	-0.00950771
U2SURP	O15042;E7ET15;E7EW00;H0Y8D9;H7C4V2	O15042;E7ET15;E7EW00;H0Y8D9	U2 snRNP-associated SURP motif-containing protein	10	10	11.7	11.7	118.29	0	38.396	469890000	31	0.399473	0.516398		0.933153	0.127294	0.962885		0.275242	0.772695	0.315988		NaN	1	0		NaN	1	0		NaN	1	0
MDK	E9PPJ5;E9PLM6;P21741	E9PPJ5;E9PLM6;P21741	Midkine	3	3	27.5	27.5	14.374	0	7.0062	981070000	14	0.396577	-0.55262		NaN	1	0		2.89539	0.0962105	-1.52933		NaN	1	0		0.292241	0.605638	-0.702847		1.27791	0.252315	1.36103
RC3H2	A6NHN2;Q9HBD1	A6NHN2;Q9HBD1	Roquin-2	3	2	7.7	5.9	56.823	0	4.5899	12651000	17	0.389943	-1.0399		NaN	1	0		0.279778	0.769692	0.548704		NaN	1	0		NaN	1	0		NaN	1	0
ARGLU1	Q9NWB6	Q9NWB6	Arginine and glutamate-rich protein 1	17	17	42.5	42.5	33.216	0	28.972	2793400000	170	0.388849	-0.262141		0.247508	0.601255	0.407636		0.507039	0.63728	0.39591		2.97426	0.00310204	-4.39635		0.382348	0.550046	-1.31553		0.244168	0.774527	0.598016
PRDX1	Q06830;A0A0A0MSI0;A0A0A0MRQ5	Q06830;A0A0A0MSI0	Peroxiredoxin-1	13	10	52.3	37.2	22.11	0	37.638	8485900000	193	0.387423	0.374881		2.15271	0.00945352	0.28196		0.845534	0.473276	-0.442791		0.641691	0.245855	-0.658932		0.651444	0.369048	-0.696271		1.00321	0.33132	-0.806496
RPS10;RPS10-NUDT3	P46783;F6U211;A0A2R8Y7H1;A0A2R8YFH6;A0A1W2PQS6;A0A2R8Y6L3;S4R435;Q9NQ39	P46783;F6U211;A0A2R8Y7H1;A0A2R8YFH6;A0A1W2PQS6;A0A2R8Y6L3;S4R435	40S ribosomal protein S10	11	10	49.7	45.5	18.898	0	120.08	8261300000	132	0.382273	0.832567		1.03105	0.0879157	0.964122		1.01968	0.3955	1.02311		1.31261	0.0612226	-2.88722		0.487654	0.477134	-0.458508		0.867126	0.378315	1.45953
DSG1	Q02413	Q02413	Desmoglein-1	8	8	10.3	10.3	113.75	0	34.32	477150000	55	0.369748	0.755404		0.321879	0.558664	-1.02298		0.24136	0.803007	0.487999		1.9519	0.0148889	-2.81154		4.43369	0.000738462	-4.10115		0.701809	0.439824	-0.911787
DIMT1	Q9UNQ2;A0A494C0G7;A0A0C4DGB1;D6RCL3	Q9UNQ2;A0A494C0G7;A0A0C4DGB1	Probable dimethyladenosine transferase	8	8	33.5	33.5	35.236	0	11.503	584800000	32	0.366866	0.378063		NaN	1	0		1.862	0.224	-0.942902		1.95826	0.0148806	-1.0934		NaN	1	0		0.979218	0.339228	-0.727473
NCAN	O14594	O14594	Neurocan core protein	4	4	3.9	3.9	143.09	0	13.478	142210000	31	0.366039	0.300767		0.576918	0.430893	-0.205507		1.01476	0.396152	-0.441081		NaN	1	0		1.4875	0.0461311	-1.13796		0.639219	0.47233	0.44451
SFPQ	P23246;H0Y9K7;H0Y9U2	P23246	Splicing factor, proline- and glutamine-rich	22	20	29.7	28.3	76.149	0	88.23	14500000000	312	0.350209	0.161885		3.01584	0.00391973	0.942724		1.24752	0.318642	-0.334823		0.110277	0.8307	-0.110931		0.796334	0.242254	-0.625464		1.35902	0.222462	-0.618568
MECP2	P51608;I6LM39;A0A087X1U4;A0A087WVW7;A0A0D9SFX7;B5MCB4	P51608;I6LM39;A0A087X1U4	Methyl-CpG-binding protein 2	9	9	23.7	23.7	52.44	0	29.338	680250000	30	0.349638	0.285773		NaN	1	0		0.120996	0.886535	-0.102034		1.36939	0.0534909	-1.32402		NaN	1	0		0.987088	0.336238	-0.755985
GRSF1	F5H5I6;Q12849;H0Y8R1;H0YAK1;H0YAM1	F5H5I6;Q12849;H0Y8R1;H0YAK1	G-rich sequence factor 1	8	8	18.9	18.9	47.971	0	13.84	476220000	26	0.343577	-0.699226		NaN	1	0		0.342804	0.733783	0.512769		2.23927	0.00965401	-1.29028		NaN	1	0		1.51654	0.179919	-0.825452
NOC3L	Q8WTT2	Q8WTT2	Nucleolar complex protein 3 homolog	8	8	11.9	11.9	92.547	0	38.186	1040000000	39	0.343421	-0.35628		NaN	1	0		0.817145	0.483242	-0.481852		2.24615	0.00952542	-1.63998		0.128884	0.768669	-0.39365		0.462772	0.568979	0.669628
HDGFRP3	Q9Y3E1;H3BPQ6;H3BPM9	Q9Y3E1;H3BPQ6	Hepatoma-derived growth factor-related protein 3	4	4	17.2	17.2	22.619	0	18.669	130740000	18	0.343023	-0.403433		NaN	1	0		0.987318	0.40347	-0.680385		NaN	1	0		NaN	1	0		NaN	1	0
CAPN1	P07384;E9PL37;E9PIA9;E9PLX0;E9PJJ3;E9PLC9;E9PMC6;E9PJA6;E9PSA6;E9PQB3;E9PRM1	P07384	Calpain-1 catalytic subunit	6	6	8.1	8.1	81.889	0	7.5801	92918000	33	0.338653	-0.741123		0.149521	0.677889	-0.238221		0.303063	0.754135	-0.447146		NaN	1	0		NaN	1	0		NaN	1	0
CBX3	Q13185;S4R2Y4;C9JMM0;B8ZZ43;K7ELA4;B5MD17;J3KS05;P83916	Q13185;S4R2Y4;C9JMM0;B8ZZ43	Chromobox protein homolog 3	6	6	36.6	36.6	20.811	0	37.232	1313400000	57	0.334227	0.443169		0.386103	0.528	0.543778		0.164584	0.865187	-0.193945		1.74871	0.0223298	-1.95733		0.821741	0.221285	-0.940808		0.472993	0.562192	0.562131
MRPL50	Q8N5N7	Q8N5N7	39S ribosomal protein L50, mitochondrial	6	6	47.5	47.5	18.325	0	16.535	615750000	35	0.326873	0.37007		0.0118498	0.957742	-0.0218922		1.55545	0.251817	-1.14652		1.14538	0.0891075	-1.6848		NaN	1	0		0.903118	0.364989	-1.12886
PRRC2A	P48634	P48634	Protein PRRC2A	17	17	12.3	12.3	228.86	0	108.19	2317800000	88	0.3216	0.52472		0.766113	0.26739	0.955272		0.129553	0.87814	-0.185429		0.719749	0.206855	0.776867		1.00741	0.128068	0.320113		1.14687	0.292956	0.712982
SART3	A0A499FI31;Q15020;H0YHU8;A0A494C0L2;F8W667	A0A499FI31;Q15020	Squamous cell carcinoma antigen recognized by T-cells 3	9	9	13.6	13.6	111.96	0	66.262	692470000	34	0.321323	0.264659		NaN	1	0		1.61449	0.24902	-0.729751		NaN	1	0		NaN	1	0		NaN	1	0
TROVE2	P10155;G5E9R9	P10155	60 kDa SS-A/Ro ribonucleoprotein	3	3	5.9	5.9	60.67	0	5.812	31565000	9	0.317546	-0.568065		NaN	1	0		0.0980915	0.903503	-0.150312		NaN	1	0		NaN	1	0		NaN	1	0
ZNF445	P59923;A0A087X0J9	P59923	Zinc finger protein 445	13	11	13.3	11.6	118.96	0	27.382	942380000	45	0.315842	0.183654		0.404789	0.519346	0.686984		0.727054	0.522368	-0.597267		NaN	1	0		NaN	1	0		NaN	1	0
CHD3	I3L229;H7C0J3	I3L229;H7C0J3		2	2	18.1	18.1	27.814	0	24.701	274910000	7	0.311175	0.427166		NaN	1	0		2.21386	0.178091	-1.43816		NaN	1	0		NaN	1	0		NaN	1	0
TDRD3	Q9H7E2;B1AMN9	Q9H7E2	Tudor domain-containing protein 3	5	5	9.5	9.5	73.184	0	13.78	138610000	22	0.304591	-0.410388		0.925775	0.130032	0.826764		0.481741	0.644038	0.456019		NaN	1	0		NaN	1	0		NaN	1	0
MRPL34	M0R226;Q9BQ48	M0R226;Q9BQ48	Ribosomal protein L34;39S ribosomal protein L34, mitochondrial	3	3	12.5	12.5	19.802	0	6.1995	288060000	21	0.30265	0.741741		0.413423	0.515542	0.953663		0.0800288	0.911274	-0.18876		NaN	1	0		NaN	1	0		NaN	1	0
MAP1A	E9PGC8;P78559	E9PGC8;P78559	Microtubule-associated protein 1A;MAP1A heavy chain;MAP1 light chain LC2	9	9	3	3	331.25	0	21.629	981730000	48	0.30094	-0.214967		0.204006	0.632696	0.201271		0.894376	0.45081	-0.477719		1.88377	0.0172263	-0.686089		1.20479	0.083248	-2.38503		1.83521	0.130196	-1.7
EIF2S3;EIF2S3L	P41091;Q2VIR3;H7BZU1	P41091;Q2VIR3;H7BZU1	Eukaryotic translation initiation factor 2 subunit 3;Putative eukaryotic translation initiation factor 2 subunit 3-like protein	6	6	15.9	15.9	51.109	0	41.454	653900000	23	0.300027	0.402577		0.109371	0.726475	-0.200575		1.56686	0.250019	-1.3451		NaN	1	0		NaN	1	0		NaN	1	0
CCT7	Q99832;F8WAM2;F8WBP8	Q99832	T-complex protein 1 subunit eta	9	9	16.9	16.9	59.366	0	12.018	240720000	43	0.298926	-0.519025		0.09735	0.744816	-0.227574		0.0911866	0.911452	-0.166963		0.362383	0.499609	-0.421635		2.1599	0.015689	-1.83983		1.12504	0.294873	-0.817819
SSRP1	Q08945;A0A0U1RRK2	Q08945	FACT complex subunit SSRP1	11	11	12.3	12.3	81.074	0	62.243	859420000	48	0.298474	0.426167		0.921742	0.131242	1.11904		0.263772	0.782499	0.332169		NaN	1	0		NaN	1	0		NaN	1	0
RSBN1L	Q6PCB5;H7C2D3;C9JM20	Q6PCB5	Round spermatid basic protein 1-like protein	12	12	15	15	94.868	0	25.912	930930000	38	0.29705	0.475388		NaN	1	0		0.97381	0.408036	-0.796107		0.765777	0.187526	-0.998917		NaN	1	0		0.837256	0.383312	-0.888826
PRKDC	P78527	P78527	DNA-dependent protein kinase catalytic subunit	47	47	11.3	11.3	469.08	0	246.28	5261300000	202	0.295574	-0.412826		0.297753	0.571361	-0.433756		0.229532	0.813467	-0.284066		0.0464461	0.920096	0.2096		0.233115	0.656789	-0.504233		0.587969	0.50135	-1.39841
SRSF12	Q8WXF0;E5RFT0;E5RJS0	Q8WXF0	Serine/arginine-rich splicing factor 12	2	2	9.6	9.6	30.512	0	8.6589	495580000	32	0.290138	0.670104		0.789739	0.23884	1.7909		0.150859	0.869735	0.350941		NaN	1	0		NaN	1	0		NaN	1	0
NOP14	P78316;E9PFK5	P78316;E9PFK5	Nucleolar protein 14	9	9	12.4	12.4	97.667	0	23.239	363220000	29	0.2875	-0.400272		NaN	1	0		0.301691	0.751931	-0.314725		0.748244	0.194226	-0.877404		2.16086	0.0157447	-1.47787		0.154366	0.839423	-0.17776
ZNF668	Q96K58;C9JCJ0	Q96K58	Zinc finger protein 668	6	6	10.2	10.2	67.889	0	14.89	357960000	22	0.283871	-0.243506		0.319505	0.559392	0.381413		0.14386	0.874308	0.130619		NaN	1	0		NaN	1	0		NaN	1	0
SMARCC2	F8VXC8;Q8TAQ2;F8VZW6;Q92922	F8VXC8;Q8TAQ2	SWI/SNF complex subunit SMARCC2	7	7	5.2	5.2	136.18	0	19.15	666440000	37	0.28336	-0.404008		0.213518	0.626886	-0.266769		0.130828	0.881268	0.163788		1.23793	0.0734701	-1.43705		1.89925	0.0233947	-2.08068		0.315884	0.696841	-0.371616
RPL7L1	Q6DKI1;R4GMU7	Q6DKI1;R4GMU7	60S ribosomal protein L7-like 1	12	12	31.8	31.8	29.669	0	20.728	2035800000	73	0.282887	0.499877		0.633528	0.393851	0.682223		0.831622	0.473917	-0.796872		0.296845	0.569485	-0.435621		0.283439	0.612625	0.337658		0.130071	0.865294	0.160696
NOL7	Q9UMY1;H7C2B1	Q9UMY1;H7C2B1	Nucleolar protein 7	9	9	27.2	27.2	29.426	0	24.276	1782400000	45	0.282548	0.298487		NaN	1	0		3.58938	0.052	-1.79004		0.0997055	0.843454	0.151302		0.117366	0.77771	-0.173193		0.0891657	0.89651	-0.11459
WDR36	A0A0A0MTB8;Q8NI36	A0A0A0MTB8;Q8NI36	WD repeat-containing protein 36	7	7	9.5	9.5	99.365	0	13.313	372990000	37	0.281182	-0.316019		NaN	1	0		0.522679	0.628469	-0.37794		NaN	1	0		NaN	1	0		NaN	1	0
PPIA	P62937;F8WE65;C9J5S7	P62937;F8WE65;C9J5S7	Peptidyl-prolyl cis-trans isomerase A;Peptidyl-prolyl cis-trans isomerase A, N-terminally processed;Peptidyl-prolyl cis-trans isomerase	5	5	30.9	30.9	18.012	0	11.1	246170000	43	0.278861	0.414468		1.7136	0.0173931	-1.44253		0.162838	0.864099	-0.205781		NaN	1	0		NaN	1	0		NaN	1	0
LAS1L	Q9Y4W2	Q9Y4W2	Ribosomal biogenesis protein LAS1L	11	11	18.8	18.8	83.064	0	28.416	336170000	26	0.270772	0.285419		NaN	1	0		0.983376	0.4052	-0.919486		NaN	1	0		NaN	1	0		NaN	1	0
RBFOX2;RBFOX1;RBFOX3	A0A0G2JRA5;O43251;B0QYV1;S4R469;B0QYY4;J3KNW3;B7Z1U7;F8VZY7;F8VR27;Q9NWB1;A0A286YEU2;F8VZG9;A0A087X2B1;S4R3K7;A0A0G2JRD1;B0QYY7;I3L1D4;A0A0G2JSB3;A0A3B3ITL7;J3QRF4;A6NFN3;F8VRS4;J3QQZ2;B0QYY6	A0A0G2JRA5;O43251;B0QYV1;S4R469;B0QYY4;J3KNW3;B7Z1U7;F8VZY7;F8VR27;Q9NWB1;A0A286YEU2;F8VZG9;A0A087X2B1;S4R3K7;A0A0G2JRD1;B0QYY7;I3L1D4;A0A0G2JSB3;A0A3B3ITL7;J3QRF4;A6NFN3	RNA binding protein fox-1 homolog 2;RNA binding protein fox-1 homolog;RNA binding protein fox-1 homolog 1;RNA binding protein fox-1 homolog 3	8	8	20.8	20.8	41.242	0	19.172	891810000	64	0.263603	-0.538699		1.32598	0.0389189	-2.07075		0.479	0.638472	-0.664096		2.75905	0.00440976	-2.4418		NaN	1	0		NaN	1	0
DKFZp434D199;SNRNP40	Q9NSS8;Q96DI7	Q9NSS8;Q96DI7	U5 small nuclear ribonucleoprotein 40 kDa protein	3	3	24.4	24.4	14.262	0	4.7787	331850000	21	0.260819	-0.303071		0.0843035	0.768609	0.0685349		0.271073	0.776626	-0.22608		NaN	1	0		NaN	1	0		NaN	1	0
HNRNPL	A0A3B3ITJ4;M0QXS5;M0QYT0;M0R076;M0QYL7;M0R1W6;B4DVF8	A0A3B3ITJ4;M0QXS5		2	2	3.4	3.4	59.218	0	5.4301	415620000	9	0.256398	0.333245		NaN	1	0		1.81794	0.23	-1.13117		NaN	1	0		NaN	1	0		NaN	1	0
YBX3	P16989;A0A0D9SEI8	P16989	Y-box-binding protein 3	8	8	52.4	52.4	40.089	0	323.31	5114700000	66	0.25541	0.447668		NaN	1	0		1.87002	0.224179	-1.59374		0.269498	0.604902	0.673725		0.128202	0.768381	0.466777		0.473644	0.562598	-1.03788
ARPC4-TTLL3;ARPC4	F8WCF6;P59998;F8WDD7;H7C0A3;A0A0A6YYG9;R4GN08;F8WE39	F8WCF6;P59998;F8WDD7;H7C0A3;A0A0A6YYG9	Actin-related protein 2/3 complex subunit 4	5	5	26	26	21.058	0	5.5131	121370000	32	0.254969	-0.315144		0.111908	0.72363	-0.131398		0.348752	0.729103	-0.322385		2.05106	0.0130593	-1.67838		NaN	1	0		0.07654	0.906337	0.0791104
PPP2R2A	P63151;E5RIY1;E5RFR9;A0A590UJJ1;A0A590UJY3;Q9Y2T4;H0YB06;Q00005;Q66LE6	P63151	Serine/threonine-protein phosphatase 2A 55 kDa regulatory subunit B alpha isoform	5	5	12.3	12.3	51.691	0	15.592	294620000	25	0.253302	-0.483286		NaN	1	0		0.294196	0.758298	-0.460581		0.813137	0.17268	-1.27385		NaN	1	0		1.00893	0.329682	-1.03419
NOC4L	Q9BVI4;F5H303	Q9BVI4	Nucleolar complex protein 4 homolog	5	5	11	11	58.467	0	8.5835	55992000	11	0.250588	-0.350714		NaN	1	0		0.69507	0.531425	-0.697543		NaN	1	0		NaN	1	0		NaN	1	0
ZNF346	Q9UL40;D6RJ07;B7Z6B6;B7Z6Q2;B7Z4J8;B7Z4N4	Q9UL40;D6RJ07	Zinc finger protein 346	7	7	27.9	27.9	32.932	0	27.238	2067600000	47	0.249595	0.331562		0.778619	0.253509	1.12938		0.213478	0.823748	-0.283806		0.250111	0.628865	-0.429122		0.256691	0.635813	-0.713881		0.811473	0.391486	-1.19522
USP10	Q14694;J3KT19;H3BNS8;H3BQP1;H3BNA1	Q14694	Ubiquitin carboxyl-terminal hydrolase 10	7	7	11.8	11.8	87.133	0	16.817	318630000	27	0.245056	-0.292206		NaN	1	0		1.12436	0.352925	-0.83769		3.2015	0.00253107	-1.33397		NaN	1	0		2.70071	0.0412444	-1.30372
PRPF4B	Q13523;H0YDJ3	Q13523	Serine/threonine-protein kinase PRP4 homolog	10	10	10.5	10.5	116.99	0	29.336	699770000	43	0.243632	-0.465378		0.529947	0.46028	1.16917		1.11916	0.354909	1.45356		NaN	1	0		NaN	1	0		NaN	1	0
DDX39B;DDX39A	Q13838;A0A0G2JJZ9;O00148;Q5STU3;A0A140T9X3;H0Y400;A0A140T973;F6WLT2;A0A140TA18;F6UJC5;F6TRA5;A0A0A0MT12;A0A140T996;A0A140T9X9;A0A140T9K1;F6S4E6;K7EQN7;H0YCC6;A0A140T9L4	Q13838;A0A0G2JJZ9;O00148;Q5STU3;A0A140T9X3;H0Y400	Spliceosome RNA helicase DDX39B;ATP-dependent RNA helicase DDX39A	5	5	11.9	11.9	48.991	0	7.2024	758050000	55	0.23444	-0.298217		0.00594263	0.97891	-0.00446288		0.440296	0.666642	0.351486		0.459014	0.407031	-0.748109		1.59387	0.0390442	-1.19683		0.273397	0.734414	-0.355124
NOVA2;NOVA1	Q9UNW9;P51513;F8VYI3;I3L2B5;F8VWX1;F8W659;J3KQU3;M0R1A0	Q9UNW9;P51513	RNA-binding protein Nova-2;RNA-binding protein Nova-1	6	6	14.4	14.4	49.008	0	15.448	131550000	25	0.229329	-0.282404		NaN	1	0		0.403402	0.69236	-0.339064		NaN	1	0		NaN	1	0		NaN	1	0
MAK16	Q9BXY0;H0YBV6	Q9BXY0;H0YBV6	Protein MAK16 homolog	3	3	11.7	11.7	35.368	0	7.1732	545260000	20	0.227732	-0.264387		NaN	1	0		0.842203	0.469287	-0.557514		NaN	1	0		2.0226	0.018473	-1.94415		0.662749	0.458147	-0.453688
DPYSL3	Q14195;H0YBT4;D6RF19;Q14117	Q14195;H0YBT4	Dihydropyrimidinase-related protein 3	14	11	30	23.3	61.963	0	46.782	2341100000	188	0.219022	-0.452446		2.39677	0.00769501	-1.48005		0.0544133	0.941178	0.0918545		0.733085	0.19946	-1.80821		1.0691	0.110627	-1.86184		0.217237	0.799383	-0.534777
DDOST	P39656;A0A0C4DGS1;U3KQ84	P39656;A0A0C4DGS1	Dolichyl-diphosphooligosaccharide--protein glycosyltransferase 48 kDa subunit	3	3	6.8	6.8	50.8	0	4.3136	143930000	28	0.213672	-0.368855		0.461348	0.492909	0.38271		0.138137	0.877352	0.17951		NaN	1	0		NaN	1	0		NaN	1	0
EXOSC4	Q9NPD3;E9PPI9;E9PI41	Q9NPD3;E9PPI9;E9PI41	Exosome complex component RRP41	4	4	19.6	19.6	26.383	0	12.959	500570000	31	0.208671	0.239222		NaN	1	0		0.940935	0.425126	-0.856531		1.86666	0.0179055	-1.89115		1.56702	0.041349	-1.63675		0.663479	0.458744	-0.656152
AGO1	Q5TA58;A0A6I8PTZ8;Q9UL18;Q9HCK5	Q5TA58;A0A6I8PTZ8;Q9UL18	Protein argonaute;Protein argonaute-1	9	3	13.8	5.4	88.878	0	17.46	447580000	40	0.208407	0.205882		0.6169	0.405674	-0.527823		2.58928	0.133714	-0.950615		NaN	1	0		NaN	1	0		NaN	1	0
RCL1	Q9Y2P8;Q5VZU3;Q5VZU2;Q5VYW8	Q9Y2P8	RNA 3-terminal phosphate cyclase-like protein	5	5	15.8	15.8	40.842	0	15.329	664610000	29	0.207949	-0.190251		0.245518	0.601975	0.179779		0.886583	0.455148	-0.45803		NaN	1	0		NaN	1	0		NaN	1	0
PKM	H3BTN5;P14618;H3BQ34;B4DNK4;H3BT25;H3BUW1;H3BTJ2;H3BR70;H3BU13;H3BN34;H3BQZ3;P30613	H3BTN5;P14618;H3BQ34;B4DNK4;H3BT25;H3BUW1;H3BTJ2	Pyruvate kinase;Pyruvate kinase PKM	9	9	21.6	21.6	53.045	0	36.155	1105000000	92	0.206407	-0.646428		0.00729408	0.975435	-0.0167071		0.135623	0.879222	-0.319844		0.754254	0.19236	-1.88426		0.697744	0.33673	-1.78492		0.118602	0.868388	-0.34044
VDAC3	Q9Y277;E5RK27;E5RFP6;E5RJN6;E5RHZ6	Q9Y277	Voltage-dependent anion-selective channel protein 3	3	3	15.5	15.5	30.658	0	14.412	521410000	46	0.204233	0.550603		2.68863	0.00573171	-2.99106		0.142695	0.873744	-0.296634		NaN	1	0		NaN	1	0		NaN	1	0
AP2B1	A0A087X253;P63010;Q10567;A0A087WXS3;K7EKZ5;K7EJX1;K7EN71;K7ERB2;C9J1E7;A0A087WYD1;A0A087WU93;A0A087WZQ6	A0A087X253;P63010	AP-2 complex subunit beta	8	8	8.2	8.2	101.33	0	24.504	993900000	35	0.202849	-0.334257		NaN	1	0		0.87018	0.462972	-0.793156		0.236041	0.645965	-0.241205		0.663967	0.36311	-0.930781		0.838932	0.38434	-0.716932
CYFIP1	Q7L576;A0A0G2JR96;A0A0G2JQT1	Q7L576;A0A0G2JR96;A0A0G2JQT1	Cytoplasmic FMR1-interacting protein 1	11	3	9.3	2.7	145.18	0	23.806	643610000	66	0.202076	0.350353		0.479863	0.483648	0.985698		0.414673	0.6856	0.592683		0.160444	0.760679	-0.473357		1.474	0.0474318	-1.77492		0.128187	0.864746	-0.291202
PHF2	O75151;E7ET14;A0A087WW48;H0Y589	O75151	Lysine-specific demethylase PHF2	9	8	9.9	8.7	120.77	0	27.223	677500000	45	0.196818	-0.216136		0.163224	0.668286	-0.187993		0.59346	0.577035	-0.392754		1.117	0.0930729	-1.18271		0.534675	0.449803	-0.675765		1.04576	0.316936	0.93526
ZNF836	M0QYS4;Q6ZNA1;M0R1N4;A0A0A0MR57	M0QYS4;Q6ZNA1;M0R1N4;A0A0A0MR57	Zinc finger protein 836	2	2	19	19	12.39	0	3.5405	6641900	6	0.192573	-0.694971		NaN	1	0		0.174442	0.861187	0.433635		NaN	1	0		NaN	1	0		NaN	1	0
SPATA5L1	Q9BVQ7;H0YCA5	Q9BVQ7	Spermatogenesis-associated protein 5-like protein 1	6	6	9.3	9.3	80.709	0	15.763	615670000	38	0.191258	-0.327418		NaN	1	0		0.411008	0.686331	-0.418295		2.28916	0.00908155	-0.814148		2.07244	0.0172	-1.46236		0.181886	0.811824	-0.117926
PGAP1	Q75T13;B4DYY6;A6NI33	Q75T13;B4DYY6	GPI inositol-deacylase	4	4	4.2	4.2	105.38	0	8.9568	174460000	24	0.188778	-0.440991		NaN	1	0		0.0630869	0.932246	0.128425		NaN	1	0		NaN	1	0		NaN	1	0
NAP1L1	F8W118;F8VV59;B7Z9C2;F8VRJ2;H0YHC3;F8W020;F8VY35;F8W0J6;F5H4R6;H0YIV4;P55209;H0YH88;F8VXI6;F8VUX1;F8VVB5	F8W118;F8VV59;B7Z9C2;F8VRJ2;H0YHC3;F8W020;F8VY35;F8W0J6;F5H4R6;H0YIV4;P55209;H0YH88;F8VXI6;F8VUX1;F8VVB5	Nucleosome assembly protein 1-like 1	7	2	34	14.4	24.694	0	26.155	1879100000	61	0.187585	0.279338		NaN	1	0		1.07609	0.368283	-0.850358		0.122515	0.813701	0.252355		0.118749	0.778722	-0.182075		0.241021	0.77537	-0.343165
PWP1	B4DJV5;Q13610	B4DJV5;Q13610	Periodic tryptophan protein 1 homolog	5	5	13	13	49.038	0	10.5	1632200000	24	0.187349	0.24106		NaN	1	0		3.78696	0.0512	-1.97888		NaN	1	0		NaN	1	0		NaN	1	0
EIF6	P56537;B7ZBH1;A0A0U1RQV5	P56537;B7ZBH1	Eukaryotic translation initiation factor 6	3	3	17.1	17.1	26.599	0	38.19	2127600000	36	0.186068	0.375689		NaN	1	0		0.607849	0.570678	-0.743684		0.262958	0.611747	0.460475		0.261925	0.632411	0.670039		0.0593644	0.930011	0.12135
CCDC137	I3L0U5;Q6PK04	I3L0U5;Q6PK04	Coiled-coil domain-containing protein 137	5	5	23.6	23.6	33.524	0	33.208	1130100000	25	0.183867	-0.205921		NaN	1	0		0.31368	0.74899	-0.268848		1.30521	0.0621593	-1.33565		NaN	1	0		1.72813	0.144724	-1.25923
MAP4	E7EVA0;P27816;H0Y2V1;B5MEG9	E7EVA0;P27816;H0Y2V1;B5MEG9	Microtubule-associated protein;Microtubule-associated protein 4	7	1	4	0.6	245.44	0	87.656	2655000000	47	0.183282	-0.354607		NaN	1	0		0.0406427	0.961831	0.0614399		0.189373	0.714134	0.419304		0.0170154	0.961352	0.0571839		0.117558	0.869071	-0.258127
SREK1	Q8WXA9;H0YC47	Q8WXA9	Splicing regulatory glutamine/lysine-rich protein 1	5	5	10.2	10.2	59.38	0	11.351	290390000	26	0.179969	0.544662		0.723104	0.311694	1.69721		0.496196	0.642591	1.07014		NaN	1	0		NaN	1	0		NaN	1	0
LANCL1	O43813;E9PHS0;F8WDS9	O43813;E9PHS0;F8WDS9	LanC-like protein 1	3	3	9	9	45.283	0	6.095	170660000	32	0.178676	0.398424		1.00965	0.0943535	0.817714		0.331946	0.734416	0.464686		NaN	1	0		NaN	1	0		NaN	1	0
NHP2	Q9NX24;D6RC52;D6RCB9;H0YC83;J3QSY4	Q9NX24;D6RC52;D6RCB9	H/ACA ribonucleoprotein complex subunit 2	3	3	25.5	25.5	17.201	0	46.814	130570000	11	0.171504	-0.170895		NaN	1	0		0.710488	0.524115	-0.397915		NaN	1	0		NaN	1	0		NaN	1	0
GNAO1	P09471;A0A1W2PRJ7;A0A1W2PS82;A0A1W2PRE1;A0A1W2PQK2;A0A087WTB6;A0A1W2PP38;H3BTM2;A0A3B3IUA8;H0Y7F4;Q5JWE9;A0A087WZE5;A2A2R6;H0Y7E8;Q5JWD1;A0A1W2PP87;P38405	P09471;A0A1W2PRJ7;A0A1W2PS82	Guanine nucleotide-binding protein G(o) subunit alpha	7	5	22.3	15.8	40.05	0	19.076	1123600000	88	0.166106	-0.554448		3.63886	0.002375	-1.22403		0.481118	0.641733	0.776859		0.467476	0.39807	-1.22088		NaN	1	0		0.754434	0.40868	-1.3347
MACF1	H3BPE1;H3BQK9;H0Y314;H0Y390;A0A590UJG2;Q9UPN3;H0Y4F5;H0Y6T5;H0Y7I1	H3BPE1;H3BQK9;H0Y314;H0Y390;A0A590UJG2;Q9UPN3;H0Y4F5;H0Y6T5	Microtubule-actin cross-linking factor 1, isoforms 1/2/3/5	6	4	1.1	0.7	856.87	0	86.637	284720000	18	0.152326	-0.234239		NaN	1	0		0.484139	0.645263	-0.49586		NaN	1	0		NaN	1	0		NaN	1	0
PHF14	B4DG57;A0A0U1RRH6;O94880	B4DG57;A0A0U1RRH6;O94880	PHD finger protein 14	4	4	7.8	7.8	68.571	0	5.1514	30623000	6	0.151799	-0.285018		NaN	1	0		0.469833	0.642527	0.507073		NaN	1	0		NaN	1	0		NaN	1	0
NO66	Q9H6W3	Q9H6W3	Bifunctional lysine-specific demethylase and histidyl-hydroxylase NO66	8	8	15.8	15.8	71.085	0	14.545	778180000	44	0.150228	0.106387		0.537619	0.455078	0.40776		0.695885	0.532176	-0.309237		0.931071	0.13664	-0.845742		2.57241	0.00871837	-0.954506		0.100591	0.88284	0.0924633
TFAM	Q00059;H7BYN3	Q00059;H7BYN3	Transcription factor A, mitochondrial	7	7	26.8	26.8	29.096	0	12.392	589770000	37	0.149125	0.368466		0.303385	0.567738	0.568944		0.546758	0.612419	0.809091		NaN	1	0		NaN	1	0		NaN	1	0
MOV10	Q5JR04;Q9HCE1	Q5JR04;Q9HCE1	Putative helicase MOV-10	13	13	17	17	107.21	0	27.896	1001000000	57	0.149036	0.240652		0.760607	0.272798	0.984684		0.704766	0.525577	0.722234		0.200665	0.697928	-0.258352		1.084	0.10809	-1.52272		1.27442	0.252402	-1.11143
TSR1	Q2NL82;I3L4E8;I3L1Q5	Q2NL82	Pre-rRNA-processing protein TSR1 homolog	7	7	11.9	11.9	91.809	0	17.242	1003900000	30	0.144614	0.258298		NaN	1	0		0.019786	0.985205	-0.0279189		0.0904864	0.85817	-0.197824		1.08256	0.10815	-1.0144		0.412195	0.605181	-0.496286
MAGED2	Q5H909;Q9UNF1;Q5H907;A0A087X070	Q5H909;Q9UNF1;Q5H907	Melanoma-associated antigen D2	8	7	16	14.6	63.138	0	25.252	1100100000	58	0.140189	-0.178533		NaN	1	0		0.336771	0.734028	-0.326		0.44173	0.423644	-0.601131		0.849081	0.202014	-0.967712		0.191452	0.810784	-0.24714
UTP14A	Q9BVJ6;X6RJY0	Q9BVJ6	U3 small nucleolar RNA-associated protein 14 homolog A	11	8	16.9	12.1	87.977	0	29.742	803760000	38	0.13875	-0.232733		NaN	1	0		0.838846	0.467955	-0.719291		1.02167	0.11501	-0.768824		0.796384	0.242795	-1.01138		0.210291	0.800451	-0.214569
MRPL55	Q7Z7F7;X6R631;X6RIW1	Q7Z7F7;X6R631	39S ribosomal protein L55, mitochondrial	8	8	50.8	50.8	15.128	0	18.82	707640000	30	0.13603	-0.336579		0.0362436	0.88089	-0.0703068		0.149036	0.871599	-0.283602		NaN	1	0		NaN	1	0		NaN	1	0
PURA	Q00577;A0A494C0H6	Q00577	Transcriptional activator protein Pur-alpha	5	5	16.5	16.5	34.91	0	7.6057	259130000	17	0.135491	-0.250668		0.420404	0.511809	1.18041		0.632782	0.563954	1.03548		NaN	1	0		NaN	1	0		NaN	1	0
SNRPA1	H0YMA0;P09661;H0YLR3;H0YKK0	H0YMA0;P09661;H0YLR3	U2 small nuclear ribonucleoprotein A	8	8	43.7	43.7	15.839	0	33.673	3268900000	60	0.129779	0.214677		0.600361	0.418645	1.12971		0.00865842	0.98903	-0.0162434		0.305409	0.562047	-0.756658		0.282093	0.612261	0.931585		0.634106	0.47421	1.31448
FRG1	Q14331;E9PRR7;E9PLY7	Q14331;E9PRR7	Protein FRG1	4	4	17.8	17.8	29.172	0	11.681	649250000	22	0.128044	-0.216755		NaN	1	0		0.163859	0.863788	-0.195406		0.756402	0.191365	-0.879985		2.23399	0.0141538	-1.45022		0.573474	0.511681	-0.498297
RBM39	Q14498;G3XAC6;H0Y4X3;A0A0U1RQH7;A0A0U1RQW2;Q5QP23;Q5QP22;F8WF24;F2Z2Z5;A8MYG5;H0Y6I9;A0A087X122;G3V5Z6;H0YJJ3	Q14498;G3XAC6;H0Y4X3;A0A0U1RQH7	RNA-binding protein 39	19	18	33.6	33.6	59.379	0	210.94	13813000000	272	0.121049	-0.100551		4.07801	0.00181481	-1.30238		0.50448	0.639232	-0.228794		0.907449	0.14238	-0.720149		0.197002	0.688201	-0.113422		0.136877	0.859507	-0.113216
MAPK1	P28482;B3KR49	P28482	Mitogen-activated protein kinase 1	5	4	16.7	14.2	41.389	0	9.3003	296770000	34	0.119831	0.269168		0.151816	0.677905	-0.193422		0.468082	0.6432	-0.63476		NaN	1	0		NaN	1	0		NaN	1	0
SNRPC	P09234;A0A0A0MRR7;Q5TAL2	P09234;A0A0A0MRR7	U1 small nuclear ribonucleoprotein C	4	4	20.1	20.1	17.394	0	15.308	205730000	14	0.116068	-0.16542		0.409501	0.517044	0.695835		0.53941	0.617268	-0.523026		NaN	1	0		NaN	1	0		NaN	1	0
NUDT16L1	K7EIN2;Q9BRJ7;K7ENA3;W4VSQ8;Q96DE0	K7EIN2;Q9BRJ7;K7ENA3;W4VSQ8	Protein syndesmos	5	5	32.3	32.3	21.809	0	8.5213	104250000	18	0.11464	-0.092219		NaN	1	0		1.257	0.316408	-0.804127		NaN	1	0		NaN	1	0		NaN	1	0
CAMK2B	Q13554;H7BXS4;H7BZC6;E9PBE8;H0Y9C2;A0A5F9ZH90;E7ERS6;E7ETC9;H7C394	Q13554;H7BXS4	Calcium/calmodulin-dependent protein kinase type II subunit beta	10	3	17.7	5.3	72.677	0	25.924	811760000	86	0.114443	0.146911		0.2339	0.609891	-0.249861		2.25402	0.1814	1.01723		0.566545	0.297401	-1.31755		0.574257	0.426557	-0.668083		0.220866	0.797254	0.425325
SGPL1	O95470;H0Y3V8;H7BXL7	O95470	Sphingosine-1-phosphate lyase 1	6	6	12.7	12.7	63.523	0	16.74	298630000	31	0.112522	0.110347		NaN	1	0		0.320054	0.742477	0.234228		NaN	1	0		NaN	1	0		NaN	1	0
PNN	Q9H307;G3V5F0;G3V579	Q9H307	Pinin	13	13	21.5	21.5	81.627	0	18.907	338180000	42	0.111402	0.35806		0.434909	0.504985	0.988596		0.8454	0.471519	1.5167		1.02612	0.114055	-1.38344		NaN	1	0		0.628101	0.475281	-0.75797
ZNF280C	Q8ND82;Q9UJJ2	Q8ND82;Q9UJJ2	Zinc finger protein 280C	7	7	11.3	11.3	83.095	0	29.937	665360000	35	0.109074	-0.230574		0.349296	0.546205	-0.356699		0.707383	0.525981	0.757447		2.44804	0.00742342	-2.28053		1.07929	0.108469	-1.32307		0.723233	0.426207	0.755352
YTHDC1	J3QR07;Q96MU7;J3KS01;J3KRG5	J3QR07;Q96MU7	YTH domain-containing protein 1	8	8	12.7	12.7	85.586	0	13.801	296810000	33	0.105867	-0.218663		0.15889	0.672741	0.388216		0.0744408	0.918636	-0.149493		NaN	1	0		NaN	1	0		NaN	1	0
GTF3C2	Q8WUA4;A0A087WZD8;H0Y4Q6;H7C318;H7C1A9;H7C3X9	Q8WUA4;A0A087WZD8	General transcription factor 3C polypeptide 2	7	7	9.4	9.4	100.68	0	25.584	727610000	31	0.100854	0.0550974		0.708681	0.328093	0.731304		2.16337	0.189739	-0.867833		1.96254	0.0148015	-2.05182		0.80945	0.231186	-0.863226		0.404198	0.610382	0.451777
MRPL30	Q8TCC3;B8ZZV5	Q8TCC3;B8ZZV5	39S ribosomal protein L30, mitochondrial	4	4	23	23	18.546	0	9.0503	273100000	18	0.100454	-0.410017		NaN	1	0		0.683867	0.532832	-1.43628		NaN	1	0		NaN	1	0		NaN	1	0
MRPL10	Q7Z7H8	Q7Z7H8	39S ribosomal protein L10, mitochondrial	2	2	6.9	6.9	29.282	0	3.5634	193720000	17	0.097032	-0.300158		NaN	1	0		0.402203	0.692551	-0.751617		NaN	1	0		NaN	1	0		NaN	1	0
YWHAQ	P27348;E9PG15	P27348;E9PG15	14-3-3 protein theta	5	5	20.8	20.8	27.764	0	53.407	2380300000	74	0.0962424	-0.22612		0.656619	0.376736	1.87649		0.122598	0.884836	0.268194		0.876438	0.15167	-2.04133		2.0627	0.0174433	-3.77832		0.644794	0.46887	-1.3118
PABPN1	G3V4T2;B4DEH8;H0YJH9	G3V4T2;B4DEH8		5	1	35.4	9.6	20.242	0	25.573	360200000	22	0.0961674	-0.152483		NaN	1	0		0.420555	0.683435	-0.33002		NaN	1	0		3.3815	0.00284783	-2.45497		0.182808	0.812647	-0.194852
RUVBL2	Q9Y230;X6R2L4;M0R0Y3;M0R0Z0;M0QXZ7;A0A1W2PS48;M0QXI6	Q9Y230;X6R2L4;M0R0Y3	RuvB-like 2	9	9	25.9	25.9	51.156	0	39.278	664060000	63	0.0942021	0.106581		0.187861	0.646483	-0.156202		0.0901606	0.909476	0.0718772		0.912611	0.141284	-1.48304		1.80645	0.0262461	-0.962618		0.784095	0.398078	0.916117
REPIN1	Q9BWE0;E7EVL6;C9JZE3;C9JYJ8	Q9BWE0;E7EVL6;C9JZE3;C9JYJ8	Replication initiator 1	5	5	10.6	10.6	63.574	0	73.874	892240000	31	0.0900871	-0.216996		0.58379	0.428945	0.573846		0.84076	0.467635	0.979565		1.54505	0.0358452	-1.91467		0.881139	0.184694	-1.36797		0.399618	0.61058	0.572446
HACD3	H3BS72;Q9P035;H3BPZ1;H3BRL8;H3BMZ1	H3BS72;Q9P035;H3BPZ1	Very-long-chain (3R)-3-hydroxyacyl-CoA dehydratase 3	7	7	14	14	47.118	0	12.318	155400000	38	0.0892128	0.248085		1.06507	0.0783262	1.45457		0.754823	0.513223	1.14739		NaN	1	0		NaN	1	0		NaN	1	0
NUSAP1	Q9BXS6;H0YMD2	Q9BXS6	Nucleolar and spindle-associated protein 1	11	11	33.6	33.6	49.451	0	34.64	1645100000	55	0.0885047	-0.0965254		NaN	1	0		1.72473	0.233412	-0.876809		0.155261	0.765133	0.1729		0.725486	0.308937	0.777543		0.789545	0.399134	0.604697
ADNP	Q9H2P0;A0A669KBJ7;A0A2R8Y6X0;A0A2R8YCL6	Q9H2P0;A0A669KBJ7;A0A2R8Y6X0	Activity-dependent neuroprotector homeobox protein	13	13	13.6	13.6	123.56	0	25.879	277430000	32	0.0852451	0.115464		NaN	1	0		0.939982	0.422592	-0.594513		NaN	1	0		NaN	1	0		NaN	1	0
ZNF207	J3QRS9;X6R4W8;O43670;J3KS31;J3QS27;J3KTL1;J3KRB6;J3KRW6;H0Y3M2	J3QRS9;X6R4W8;O43670;J3KS31	BUB3-interacting and GLEBS motif-containing protein ZNF207	4	4	9.3	9.3	52.541	0	13.226	217840000	22	0.0820037	-0.107567		0.507481	0.473129	0.753617		0.245594	0.801788	0.281057		NaN	1	0		NaN	1	0		NaN	1	0
ATP5O	P48047;A0A494C0K9;H7C0C1;H7C086;H7C068	P48047;A0A494C0K9;H7C0C1	ATP synthase subunit O, mitochondrial	8	8	33.8	33.8	23.277	0	19.579	2171900000	115	0.0807352	-0.278098		4.14509	0.00185782	-1.68283		0.115471	0.890503	0.233352		2.14646	0.0112459	-2.49847		1.52894	0.0429711	-3.03124		0.87875	0.374857	-1.2798
BCAS2	O75934	O75934	Pre-mRNA-splicing factor SPF27	7	7	36.9	36.9	26.131	0	35.123	1842100000	45	0.0763136	0.100224		0.21276	0.626601	-0.269661		1.66111	0.245407	-1.01538		0.507137	0.354474	0.486325		0.114502	0.781839	-0.238008		0.788717	0.398796	-0.773441
DHX36	Q9H2U1;E7EWK3;A0A0G2JRP3;A0A0G2JQU7;H7C514	Q9H2U1;E7EWK3	ATP-dependent RNA helicase DHX36	14	14	17.8	17.8	114.76	0	52.576	1121800000	58	0.0735251	0.0821692		0.0173942	0.936306	0.0331103		0.606182	0.569459	-0.509413		1.35021	0.0557477	-0.9354		0.861379	0.194338	-1.05856		0.718082	0.42981	-0.541589
YWHAZ	P63104;E7EX29;E7ESK7;E5RIR4;E9PD24;E7EVZ2;E5RGE1;B0AZS6;B7Z2E6;H0YB80	P63104;E7EX29;E7ESK7;E5RIR4;E9PD24;E7EVZ2;E5RGE1	14-3-3 protein zeta/delta	8	6	36.3	30.2	27.745	0	42.092	1836600000	75	0.0716366	-0.212792		0.00123864	0.994907	0.00433985		0.306315	0.751907	-0.484514		0.822171	0.169396	0.93563		0.34954	0.572023	-0.834927		1.4681	0.195184	-1.61967
PUF60	A0A0J9YVR6;E9PQ56;A0A0J9YWM1;H0YEM1;A0A0J9YYL3;A0A0J9YXJ8;A0A0J9YVP6;A0A0J9YXX5;Q9UHX1;E9PL19;E9PMU7;E9PN18;H0YCP8	A0A0J9YVR6;E9PQ56;A0A0J9YWM1;H0YEM1;A0A0J9YYL3;A0A0J9YXJ8;A0A0J9YVP6;A0A0J9YXX5;Q9UHX1;E9PL19;E9PMU7;E9PN18;H0YCP8	Poly(U)-binding-splicing factor PUF60	4	4	13.7	13.7	33.655	0	10.134	626990000	39	0.0715257	-0.147458		0.278642	0.583207	-0.408966		0.432272	0.673158	-0.562711		0.802828	0.175415	-0.995029		1.11871	0.102097	-0.934363		0.187669	0.809645	0.225821
SF3A2	Q15428;K7EMT0	Q15428;K7EMT0	Splicing factor 3A subunit 2	6	6	13.4	13.4	49.255	0	15.575	186750000	29	0.0686116	-0.159626		0.178523	0.655107	0.348788		0.13032	0.879512	0.232907		NaN	1	0		NaN	1	0		NaN	1	0
WDR6	E9PDU5;A0A087X295;Q9NNW5;E9PBK6;Q6PKC6	E9PDU5;A0A087X295;Q9NNW5;E9PBK6	WD repeat-containing protein 6	4	4	5.8	5.8	116.17	0	24.509	61373000	12	0.0575322	-0.0855658		NaN	1	0		0.623421	0.567897	0.521535		NaN	1	0		NaN	1	0		NaN	1	0
RBM3	P98179	P98179	RNA-binding protein 3	4	4	35	35	17.17	0	73.773	3823100000	48	0.0512145	0.0932672		NaN	1	0		1.028	0.390164	-0.80978		0.785046	0.181518	1.15479		0.065017	0.860147	0.162416		0.863503	0.374896	-1.13535
KRI1	A0A494C108;Q8N9T8;H0YFD2;F8WFC1;H0YG91;H0YH26	A0A494C108;Q8N9T8;H0YFD2;F8WFC1	Protein KRI1 homolog	8	8	12	12	83.251	0	282.49	2192600000	38	0.0511182	0.0869128		NaN	1	0		0.85616	0.467795	-0.67037		0.103388	0.839912	-0.272172		1.11383	0.102653	1.00145		1.60789	0.168397	1.84459
HNRNPH2	P55795	P55795	Heterogeneous nuclear ribonucleoprotein H2	7	7	18.5	18.5	49.263	0	13.592	840950000	49	0.0476732	0.0763168		NaN	1	0		0.754004	0.512384	-0.604955		2.42559	0.00773333	-1.37431		4.21418	0.000907801	-2.06792		1.05765	0.314528	-0.439142
DLST	P36957;Q86SW4;H0YJF9;G3V3F0;G3V5M3	P36957;Q86SW4	Dihydrolipoyllysine-residue succinyltransferase component of 2-oxoglutarate dehydrogenase complex, mitochondrial	10	10	19	19	48.755	0	41.542	1142700000	73	0.0452788	0.129409		0.738244	0.297674	-1.68452		0.490892	0.646676	-0.709973		1.98415	0.0142727	-3.61382		2.14842	0.0159155	-4.06131		0.061583	0.926526	0.164339
NOC2L	Q9Y3T9	Q9Y3T9	Nucleolar complex protein 2 homolog	9	9	11.5	11.5	84.918	0	19.634	853030000	54	0.0450576	0.0844038		NaN	1	0		0.415453	0.685978	-0.438036		0.404904	0.458575	-0.410755		2.21007	0.0148364	-0.992969		0.1282	0.866056	-0.0873235
SF3B6	Q9Y3B4	Q9Y3B4	Splicing factor 3B subunit 6	4	4	33.6	33.6	14.585	0	8.3738	437670000	28	0.0450188	-0.060527		NaN	1	0		2.72135	0.114667	-1.16815		1.14123	0.0891596	-0.921005		NaN	1	0		0.465543	0.569002	-0.422951
MYL6	F8W1R7;J3KND3;G8JLA2;G3V1V0;B7Z6Z4;P60660;G3V1Y7;F8VPF3;F8VZU9;F8W180;F8VXL3;H0YI43;F8W1I5;P14649	F8W1R7;J3KND3;G8JLA2;G3V1V0;B7Z6Z4;P60660;G3V1Y7;F8VPF3;F8VZU9;F8W180	Myosin light polypeptide 6	4	4	31	31	16.29	0	15.218	1276500000	61	0.0436368	0.117865		NaN	1	0		0.0231455	0.982133	0.0457714		0.138262	0.792571	-0.39882		0.0121761	0.970184	-0.0195897		0.389755	0.621532	0.665382
GNB2L1	P63244;D6RHH4;D6RAU2;E9PD14;D6RFX4;D6R9L0;D6RAC2;D6R9Z1;D6RFZ9;D6REE5;D6RBD0;D6RGK8;D6R909;J3KPE3;H0YAF8;H0Y8W2;H0YAM7;H0Y8R5;D6RHJ5;D6RDI0	P63244;D6RHH4;D6RAU2;E9PD14;D6RFX4;D6R9L0;D6RAC2;D6R9Z1;D6RFZ9;D6REE5;D6RBD0;D6RGK8;D6R909;J3KPE3	Guanine nucleotide-binding protein subunit beta-2-like 1;Guanine nucleotide-binding protein subunit beta-2-like 1, N-terminally processed	7	7	20.2	20.2	35.076	0	18.548	651410000	70	0.0399526	0.133576		1.4056	0.0334555	-1.98949		0.143032	0.874605	-0.315204		0.670838	0.228065	-1.28836		2.77541	0.00684716	-2.69396		1.70878	0.145025	-1.82614
CCT2	P78371;F8VQ14;F5GWF6	P78371;F8VQ14;F5GWF6	T-complex protein 1 subunit beta	8	8	18.7	18.7	57.488	0	14.812	179790000	34	0.039674	0.136733		0.423588	0.510943	0.804576		0.324024	0.737826	0.703152		1.23765	0.0732955	-1.5073		NaN	1	0		0.565127	0.515876	-0.643392
RPF1	Q9H9Y2;X6R7Q1	Q9H9Y2	Ribosome production factor 1	10	10	33.5	33.5	40.11	0	21.947	299360000	19	0.0393643	0.0703093		NaN	1	0		1.27703	0.310928	-0.876878		NaN	1	0		NaN	1	0		NaN	1	0
BMS1	Q14692	Q14692	Ribosome biogenesis protein BMS1 homolog	18	18	17.3	17.3	145.81	0	73.137	1890100000	87	0.0393155	-0.0685018		0.363583	0.540856	-0.606459		0.401318	0.692218	-0.4997		0.02998	0.948928	0.0451707		2.51212	0.00954217	0.732544		1.13187	0.296689	0.724841
CCT6A	P40227	P40227	T-complex protein 1 subunit zeta	6	4	11.9	8.7	58.024	0	7.2313	233430000	33	0.039144	0.0966017		0.36391	0.541654	-0.487572		0.012883	0.992371	0.0242203		0.781722	0.181243	-1.54052		NaN	1	0		0.124016	0.867412	-0.2375
LRRC59	Q96AG4	Q96AG4	Leucine-rich repeat-containing protein 59	5	5	19.5	19.5	34.93	0	9.4675	334200000	27	0.0387955	-0.099432		NaN	1	0		0.169194	0.863819	-0.267445		NaN	1	0		NaN	1	0		NaN	1	0
UQCRC1	P31930	P31930	Cytochrome b-c1 complex subunit 1, mitochondrial	3	3	6.2	6.2	52.645	0	4.058	49351000	18	0.0380511	0.133992		NaN	1	0		0.0234285	0.982932	-0.0593605		NaN	1	0		NaN	1	0		NaN	1	0
PTDSS1	P48651;J3KNR6	P48651	Phosphatidylserine synthase 1	4	4	11.8	11.8	55.527	0	12.537	187540000	24	0.0378919	0.0549791		NaN	1	0		0.109265	0.897329	-0.115004		NaN	1	0		NaN	1	0		NaN	1	0
FUBP3	Q96I24;A0A494C1K6	Q96I24	Far upstream element-binding protein 3	7	7	15.6	15.6	61.64	0	19.981	876690000	35	0.0370281	-0.0911617		NaN	1	0		0.34038	0.73446	-0.48609		0.539021	0.323315	-0.736459		1.24144	0.077766	-1.70459		1.04573	0.315627	-1.07437
SF3B5	Q9BWJ5	Q9BWJ5	Splicing factor 3B subunit 5	3	3	51.2	51.2	10.135	0	20.154	424910000	21	0.0366223	-0.0517254		0.186076	0.647387	0.385413		0.106502	0.898859	-0.140874		NaN	1	0		NaN	1	0		NaN	1	0
EPRS	P07814;V9GYZ6	P07814;V9GYZ6	Bifunctional glutamate/proline--tRNA ligase;Glutamate--tRNA ligase;Proline--tRNA ligase	12	12	9.3	9.3	170.59	0	22.737	918350000	57	0.0350394	0.0708764		0.322607	0.559199	-0.504357		0.229313	0.812329	0.320753		0.0700884	0.891033	0.12867		1.32992	0.0636185	-1.42846		1.38163	0.220098	-1.19283
SRBD1	Q8N5C6	Q8N5C6	S1 RNA-binding domain-containing protein 1	10	10	11.4	11.4	111.77	0	22.387	937650000	49	0.0333012	-0.0446445		NaN	1	0		1.28531	0.309801	-0.71056		0.242202	0.638212	-0.311347		0.56446	0.430707	-0.791783		0.575269	0.510731	-0.576664
ADARB1	P78563	P78563	Double-stranded RNA-specific editase 1	6	6	10.3	10.3	80.762	0	11.888	554970000	28	0.0310515	-0.05589		0.704153	0.332474	0.765299		0.108179	0.896766	0.125942		3.8804	0.00116788	-2.08354		2.00602	0.0188896	-2.16283		0.132963	0.863751	0.129957
TBL3	Q12788;J3KNP2;A0A087WYP7;H3BN88	Q12788;J3KNP2	Transducin beta-like protein 3	8	8	12.6	12.6	89.034	0	35.68	1094600000	52	0.0293787	-0.0245486		0.749704	0.284812	-0.826698		1.17242	0.3384	-0.578211		0.0260209	0.952448	0.0236619		0.336176	0.579281	-0.394048		0.0251149	0.969929	0.0218643
GON4L;YY1AP1	A0A087WUE6;Q3T8J9;Q9H869;B0QZ55;A4PB68	A0A087WUE6;Q3T8J9;Q9H869	GON-4-like protein;YY1-associated protein 1	3	3	3.4	3.4	170.69	0	7.4117	59840000	14	0.0271352	0.0520914		NaN	1	0		0.0940034	0.907344	-0.120511		NaN	1	0		NaN	1	0		NaN	1	0
RPS28	P62857	P62857	40S ribosomal protein S28	3	3	34.8	34.8	7.8409	0	9.594	196400000	26	0.0267219	0.0410885		NaN	1	0		0.551789	0.609284	-0.495355		NaN	1	0		3.11748	0.00423645	-1.79606		1.12902	0.295374	-0.546009
LUC7L3	J3KPP4;O95232;D6RDI2;H0YA81;D6RHH0;U3KQT3;E7EN55;C9JL41	J3KPP4;O95232;D6RDI2	Luc7-like protein 3	6	6	14.7	14.7	58.22	0	58.908	343310000	28	0.0226884	0.0365211		0.117682	0.71602	-0.398492		0.106132	0.898212	0.222389		NaN	1	0		NaN	1	0		NaN	1	0
HNRNPDL	A0A087WU03	A0A087WU03		2	2	40.4	40.4	6.7215	0	104.64	1959100000	48	0.0224008	-0.04039		0.404307	0.51855	0.281114		0.200786	0.840237	-0.202398		0.421807	0.443921	0.670444		0.907357	0.170729	0.616405		0.10767	0.878248	0.143281
WDR74	Q6RFH5;E9PS41;H0YFP2	Q6RFH5;E9PS41	WD repeat-containing protein 74	3	3	11.2	11.2	42.441	0	19.943	691740000	18	0.0186677	-0.0359135		NaN	1	0		0.752607	0.512328	-0.755137		NaN	1	0		NaN	1	0		NaN	1	0
SNW1	G3V4X8;Q13573;G3V3A4	G3V4X8;Q13573;G3V3A4	SNW domain-containing protein 1	8	8	27.5	27.5	43.331	0	19.092	818720000	49	0.0142347	0.0228767		1.18319	0.0549275	1.14449		0.339718	0.733976	0.324478		0.672127	0.227596	-0.909894		0.0693711	0.852512	-0.0889184		0.0934223	0.891794	0.124605
BAZ1B	Q9UIG0	Q9UIG0	Tyrosine-protein kinase BAZ1B	25	25	19.2	19.2	170.9	0	60.731	1837800000	86	0.0135775	-0.0197864		0.196042	0.638374	0.332499		0.125996	0.879715	-0.157465		0.0868308	0.864648	-0.141405		0.33116	0.58252	0.23741		0.785488	0.397964	0.602557
NUDT21	O43809;H3BND3	O43809	Cleavage and polyadenylation specificity factor subunit 5	3	3	15.9	15.9	26.227	0	5.1004	153230000	18	0.0133239	-0.0290705		0.0459635	0.855073	0.0771468		0.0903888	0.91035	0.125049		NaN	1	0		NaN	1	0		NaN	1	0
NOP10	Q9NPE3	Q9NPE3	H/ACA ribonucleoprotein complex subunit 3	2	2	31.2	31.2	7.7059	0	4.4472	172500000	17	0.0122808	0.0180126		1.04116	0.0848302	1.23852		0.530411	0.622756	0.51875		NaN	1	0		NaN	1	0		NaN	1	0
SF3B4	Q15427;Q5SZ64	Q15427	Splicing factor 3B subunit 4	3	3	7.8	7.8	44.385	0	20.578	817160000	33	0.0113375	-0.0209868		0.00492442	0.981399	-0.00907389		0.329901	0.73451	0.394668		NaN	1	0		1.40889	0.0540884	-1.35048		0.0522675	0.937659	0.0738636
PCBP2;PCBP3	Q15366;F8VZX2;H3BRU6;P57721;E9PFP8;J3QT27;F8W0G4;F8VXH9;F8VRH0;F8W1G6;H3BSS4;C9JZY3;C9J0A4;H3BSP4;C9K0A2;C9JTY5;C9J5V4;C9JSA6;C9J7A9;C9IZV9;F8VTZ0;F8WC71;P57723	Q15366;F8VZX2;H3BRU6;P57721;E9PFP8;J3QT27;F8W0G4	Poly(rC)-binding protein 2;Poly(rC)-binding protein 3	2	2	6.6	6.6	38.58	0	8.299	1587900000	68	0.00901982	0.0195084		3.98733	0.00201786	-2.92344		1.69603	0.242465	-1.33591		0.0687314	0.89248	-0.159359		0.0531224	0.880752	0.0386416		0.401717	0.608941	0.519331
KIF5B	P33176	P33176	Kinesin-1 heavy chain	8	4	10	4.9	109.68	0	18.963	282120000	37	0.0088967	0.0173102		0.115547	0.718556	0.213839		0.135982	0.879911	0.17862		0.914624	0.141007	-1.68155		NaN	1	0		0.429694	0.591494	-0.697353
EIF2AK2	P19525;F8WBH4;C9JZT2	P19525	Interferon-induced, double-stranded RNA-activated protein kinase	10	10	19.1	19.1	62.094	0	24.764	1441200000	72	0.00835892	0.0096692		0.267274	0.586786	-0.389798		1.0917	0.366854	-0.698675		0.59832	0.273984	0.234746		0.0595617	0.868457	0.0323852		1.84044	0.130337	-0.356807
VDAC2	A0A0A0MR02;P45880;Q5JSD2;Q5JSD1;A2A3S1	A0A0A0MR02;P45880;Q5JSD2;Q5JSD1	Voltage-dependent anion-selective channel protein 2	6	6	25.5	25.5	30.348	0	19.111	1556800000	116	0.00591693	0.00934919		4.33874	0.0013198	-1.33444		0.420761	0.68471	-0.277217		0.22943	0.654667	-0.397355		2.7733	0.00681739	-3.025		3.92401	0.0112727	-2.67206

## Sheet: Table S1B
Table 2. ChaC-UNC0965 with hippocampus of WT, 5xFAD and MS1262-treated 5xFAD mice (labeled as WT, AD, AD-tr in the table)
													Experiment #1															Experiment #2
Gene names	Protein IDs	Majority protein IDs	Protein names	Razor + unique peptides	Unique peptides	Unique + razor sequence coverage [%]	Unique sequence coverage [%]	Mol. weight [kDa]	Q-value	Score	Intensity	MS/MS count	-Log p-value exp1_U965_AD/emp_AD	log2 exp1_U965_AD/emp_AD	exp1_U965_AD/emp_AD_p0.05	-Log p-value exp1_U965_AD_tr/emp_AD_tr	log2 exp1_U965_AD_tr/emp_AD_tr	exp1_U965_AD_tr/emp_AD_tr	-Log p-value exp1_U965_WT/emp_WT	log2 exp1_U965_WT/emp_WT	exp1_U965_WT/emp_WT	-Log p-value exp1_U965_AD/U965_WT	log2 exp1_U965_AD/U965_WT	exp1_U965_AD/U965_WT_p0.05	-Log p-value exp1_U965_AD_tr/U965_AD	log2 exp1_U965_AD_tr/U965_AD	exp1_U965_AD_tr/U965_AD_p0.05	-Log p-value exp2_U965_AD/emp_AD	log2 exp2_U965_AD/emp_AD	exp2_U965_AD/emp_AD_p0.05	-Log p-value exp2_U965_AD_tr/emp_AD_tr	log2 exp2_U965_AD_tr/emp_AD_tr	exp2_U965_AD_tr/emp_AD_tr_p0.05	-Log p-value exp2_U965_WT/emp_WT	log2 exp2_U965_WT/emp_WT	exp2_U965_WT/emp_WT_p0.05	-Log p-value exp2_U965_AD/U965_WT	log2 exp2_U965_AD/U965_WT	exp2_U965_AD/U965_WT_p0.05	-Log p-value exp2_U965_AD_tr/U965_AD	log2 exp2_U965_AD_tr/U965_AD	exp2_U965_AD_tr/U965_AD_p0.05
Rps17	P63276	P63276	40S ribosomal protein S17	18	18	83.7	83.7	15.524	0	323.31	397030000000	1297	7.11162	5.77894	spe	19.3476	5.69693	spe	6.73382	6.17648	spe	0.212327	-0.0436697		0.318721	-0.0656516		3.38973	1.06319	spe	2.79722	2.13044	spe	2.19052	1.23878	spe	0.0452234	-0.0353858		1.45087	0.320726	up0.3
Rpl21	Q9CQM8;O09167	Q9CQM8;O09167	60S ribosomal protein L21	22	22	68.1	68.1	18.579	0	204.98	494230000000	1131	9.59891	8.50303	spe	14.6583	8.04992	spe	10.7572	8.50038	spe	0.736714	0.216938		2.10339	-0.408664	down0.3	2.77755	4.21786	spe	9.63802	6.54911	spe	3.83529	4.11825	spe	0.238195	-0.242809		1.41217	0.670638	up0.5
Fau	P62862;A0A494B9Z0;A0A494BBA8;Q642K5	P62862;A0A494B9Z0;A0A494BBA8;Q642K5	40S ribosomal protein S30	6	6	33.9	33.9	6.6478	0	14.665	127620000000	387	5.63881	5.79644	spe	7.67706	5.29034	spe	3.29535	4.80352	spe	0.225101	0.425482		1.29711	0.315945	up0.3	3.82912	3.59966	spe	9.09004	4.90598	spe	2.54106	1.70353	spe	0.376935	-0.319362		2.35159	0.507919	up0.5
Purb	O35295	O35295	Transcriptional activator protein Pur-beta	23	20	74.1	70.7	33.901	0	323.31	325510000000	1019	10.3613	8.11773	spe	13.2787	8.36297	spe	9.69475	8.44838	spe	0.0122775	-0.00653553		0.129136	0.038489		7.53343	2.22647	spe	3.41087	2.65557	spe	8.48015	2.86025	spe	1.9013	-0.427817	down0.3	0.0357401	-0.0132583
Rpl26	P61255;B1ARA5;B1ARA3	P61255;B1ARA5;B1ARA3	60S ribosomal protein L26	25	25	73.8	73.8	17.258	0	311	1073300000000	1910	13.569	9.8811	spe	15.5576	9.08399	spe	9.43809	9.69181	spe	0.232564	-0.0621767		0.526644	-0.134182		6.12174	4.41496	spe	5.32014	4.39257	spe	9.02923	5.10305	spe	1.53461	-0.437107	down0.3	0.574369	0.304658
Rps13	P62301;Q921R2;A0A0U1RQ71	P62301;Q921R2	40S ribosomal protein S13	21	21	76.8	76.8	17.222	0	203.15	199880000000	740	9.81949	7.05657	spe	9.82664	6.59594	spe	8.62027	7.00574	spe	1.12536	0.311235		1.7758	-0.205357	down0.2	2.67998	1.81478	spe	3.12029	2.9159	spe	5.78857	2.57637	spe	1.8008	-0.866042	down0.5	0.0419194	0.0279859
Rpl29;Gm3550	P47915;W4VSN7;A0A1L1SS27;A0A1L1STJ3;A0A1L1SUN1	P47915;W4VSN7;A0A1L1SS27	60S ribosomal protein L29	12	12	41.9	41.9	17.587	0	105.94	427320000000	688	6.08988	6.67369	spe	9.28979	6.3004	spe	10.8463	6.12941	spe	0.0620273	0.0275997		1.45372	-0.393989	down0.3	4.66835	2.50336	spe	2.92655	3.32039	spe	7.12152	3.65906	spe	1.8629	-0.719808	down0.5	0.265087	-0.182924
Rpl14	Q9CR57;A0A1L1SUF6	Q9CR57	60S ribosomal protein L14	22	22	64.1	64.1	23.564	0	318.67	370280000000	1138	8.40374	4.99442	spe	15.1404	5.14012	spe	10.0358	5.58925	spe	0.196195	0.0580037		2.90704	-0.452471	down0.3	3.05843	4.81341	spe	5.69582	5.75911	spe	7.76621	6.09452	spe	1.2952	-0.937575	down0.5	0.245621	0.231987
Rpl37a	P61514;A0A1D5RL86	P61514	60S ribosomal protein L37a	7	7	59.8	59.8	10.275	0	95.963	199330000000	534	9.20797	7.03944	spe	11.7931	6.62894	spe	9.61632	7.41194	spe	0.633904	-0.157077		4.67334	-0.963131	down0.5	3.0203	3.22664	spe	5.68475	3.8931	spe	5.38031	4.66931	spe	2.02529	-0.869893	down0.5	0.212276	0.177627
Mecp2	Q9Z2D6;D3YY81	Q9Z2D6	Methyl-CpG-binding protein 2	15	12	34.3	25.4	52.307	0	149.49	16288000000	387	5.99959	3.94623	spe	10.4498	3.51717	spe	5.84162	3.73727	spe	0.0868441	0.0368786		1.71914	-0.506325	down0.5	5.56063	2.92601	spe	4.63135	2.57915	spe	8.44837	3.52445	spe	1.91786	-0.81063	down0.5	0.487071	0.261124
Rpl35	Q6ZWV7;Q3U1U4;F6YXU0	Q6ZWV7	60S ribosomal protein L35	10	10	49.6	49.6	14.552	0	323.31	505150000000	741	10.3346	6.70985	spe	15.0871	6.42619	spe	6.9557	7.21537	spe	0.0434931	0.0164671		0.296191	-0.109338		3.93	2.35288	spe	3.56369	3.92506	spe	4.40382	3.28976	spe	1.88347	-0.541839	down0.5	1.03115	0.319415
Rps24	P62849;A0A286YEB7	P62849;A0A286YEB7	40S ribosomal protein S24	13	13	47.4	47.4	15.423	0	150.76	118540000000	557	8.41267	6.42125	spe	13.2068	6.87172	spe	5.42386	6.65204	spe	0.247028	0.365645		0.0787688	0.0311102		2.76826	2.60321	spe	6.13498	4.2221	spe	4.06895	3.832	spe	1.91175	-0.69171	down0.5	0.770701	0.379557
Rps8	P62242	P62242	40S ribosomal protein S8	23	23	62.5	62.5	24.205	0	323.31	963240000000	1866	7.29434	7.99382	spe	12.3004	7.55543	spe	10.7361	7.65958	spe	0.24823	-0.0695661		0.149291	-0.0428227		5.53153	2.66789	spe	7.68964	2.89861	spe	8.51522	3.17796	spe	1.70275	-0.752771	down0.5	0.133237	0.0993881
Rpl17	Q6ZWZ7;Q9CPR4;B2RY53	Q6ZWZ7;Q9CPR4	60S ribosomal protein L17	26	26	79.3	79.3	21.397	0	323.31	395570000000	1324	9.02643	8.28593	spe	14.9679	8.44566	spe	9.86556	8.41401	spe	0.724204	0.161744		1.29589	-0.203892	down0.2	3.05759	4.04183	spe	2.81934	3.41764	spe	4.37251	3.24513	spe	0.681243	-0.384449		0.218965	-0.162024
Rpl10;Rpl10l	Q6ZWV3;I7HLV2;P86048;A0A1B0GXC3	Q6ZWV3;I7HLV2;P86048	60S ribosomal protein L10;60S ribosomal protein L10-like	26	26	78.5	78.5	24.604	0	323.31	446320000000	1236	11.652	8.32753	spe	16.4605	8.40095	spe	8.7189	8.74031	spe	0.424501	0.15884		2.90105	-0.343506	down0.3	4.04374	2.46179	spe	3.35114	2.45862	spe	1.4545	2.34077	spe	0.237143	0.453636		0.0112405	-0.0175769
Rpl18	P35980;A0A1B0GSS8;A0A1B0GQU8;A0A1B0GSF7;A0A1B0GSA8;A0A1B0GS28;A0A1B0GRZ3	P35980;A0A1B0GSS8;A0A1B0GQU8;A0A1B0GSF7;A0A1B0GSA8	60S ribosomal protein L18	18	18	60.1	60.1	21.644	0	270.56	377610000000	1067	10.0894	7.75179	spe	7.34323	5.89383	spe	5.50399	6.77459	spe	0.151239	-0.0289758		2.09264	-0.466229	down0.3	4.11045	2.02658	spe	6.89574	1.593	spe	3.89523	1.82019	spe	0.014731	0.0175873		0.707954	-0.401481
Rpl7	P14148;F6XI62	P14148;F6XI62	60S ribosomal protein L7	42	42	77	77	31.419	0	323.31	898990000000	2064	10.4788	5.8423	spe	16.9504	6.06245	spe	11.0782	6.4044	spe	0.102291	0.0415421		1.73323	-0.456043	down0.3	3.69305	2.34643	spe	4.14348	2.67336	spe	6.11066	3.53082	spe	0.849486	-0.538131		0.149758	-0.130443
Hp1bp3	Z4YKB8;Q3TEA8;Z4YKA3;A2AM65;A2AM63;A2AM62;A2AM70;A2AM69	Z4YKB8;Q3TEA8;Z4YKA3;A2AM65	Heterochromatin protein 1-binding protein 3	44	44	45.1	45.1	60.85	0	323.31	268860000000	1514	11.6247	7.96116	spe	14.3499	7.40518	spe	9.64999	7.83214	spe	0.238721	0.0870956		1.85608	-0.478024	down0.3	7.29741	6.55641	spe	7.84597	4.81428	spe	7.08704	5.56728	spe	0.421734	-0.202971		0.462626	-0.182775
Rpl13	P47963	P47963	60S ribosomal protein L13	32	32	73.9	73.9	24.305	0	323.31	889700000000	2375	11.8955	5.98729	spe	14.7238	6.00495	spe	11.9898	6.48737	spe	0.318054	0.091582		2.0219	-0.438178	down0.3	3.31068	2.46326	spe	8.1187	2.11357	spe	7.12308	2.69313	spe	0.325128	-0.316559		0.0777386	-0.0887006
Hist1h1b	P43276	P43276	Histone H1.5	12	12	31.4	31.4	22.576	0	217.36	30134000000	340	4.93302	3.53504	spe	13.2475	4.4898	spe	7.32396	4.8037	spe	0.0182163	0.00927957		1.38647	-0.413262	down0.3	6.31305	4.77902	spe	6.81314	4.06371	spe	7.98146	4.74952	spe	0.01553	0.0168667		0.0580422	-0.0562229
Ncl	P09405;A0A087WRM5	P09405	Nucleolin	58	58	54	54	76.722	0	323.31	346440000000	1842	12.8402	8.34537	spe	15.0983	8.36602	spe	11.3111	8.34017	spe	1.61828	0.317609	up0.3	2.49479	-0.634028	down0.5	3.47589	3.17613	spe	4.64872	2.564	spe	7.9844	2.96515	spe	0.190398	-0.18439		0.0305328	-0.0354605
Nono	Q99K48	Q99K48	Non-POU domain-containing octamer-binding protein	26	26	50.3	50.3	54.54	0	216.77	22733000000	421	6.56016	4.43642	spe	7.82479	3.61523	spe	6.30665	3.62148	spe	1.55112	0.582911	up0.5	3.36836	-0.745527	down0.5	3.64903	2.85246	spe	1.96001	1.38323	spe	2.68849	2.20133	spe	0.707125	-0.663584		0.313958	0.36673
Rpl13a	P19253;A0A1B0GS68;A0A1B0GTA1;A0A1B0GSQ6;A0A1B0GSB2;A0A1B0GT00;A0A1B0GSC2;A0A1B0GRH1;A0A1B0GQW6;A0A1B0GSF0;A0A1B0GSJ2;A0A1B0GSL5	P19253;A0A1B0GS68;A0A1B0GTA1;A0A1B0GSQ6;A0A1B0GSB2;A0A1B0GT00;A0A1B0GSC2	60S ribosomal protein L13a	31	31	72.9	72.9	23.464	0	306.48	452220000000	1314	9.13987	8.18484	spe	17.9047	7.61125	spe	9.71864	8.91224	spe	0.999683	0.315024		3.82984	-0.592319	down0.5	5.24745	3.89795	spe	4.81664	3.249	spe	5.57716	3.91836	spe	0.00613721	-0.00958633		0.0765828	0.0939665
Rpl22	P67984	P67984	60S ribosomal protein L22	10	7	51.6	42.2	14.759	0	100.23	99937000000	476	5.28628	4.54945	spe	8.8299	5.3204	spe	5.32578	5.40408	spe	0.259136	0.154366		1.55219	-0.638589	down0.5	8.56948	4.14758	spe	7.52212	3.68001	spe	2.41558	3.2164	spe	1.21752	-0.395994		0.666533	0.152204
Rpl4	Q9D8E6	Q9D8E6	60S ribosomal protein L4	51	51	69.5	69.5	47.153	0	323.31	936920000000	2438	14.9964	6.88215	spe	16.1992	6.86121	spe	6.90102	8.45324	spe	0.193691	0.0475429		2.46532	-0.526512	down0.5	3.82568	1.70879	spe	2.79361	1.97879	spe	4.95497	2.47563	spe	1.14578	-0.493282		0.18107	-0.0920146
Rpl28	P41105;F6Z0X0	P41105	60S ribosomal protein L28	27	27	79.6	79.6	15.733	0	323.31	555750000000	1249	10.4076	9.23689	spe	15.709	8.17185	spe	10.2696	9.34538	spe	0.461348	0.21445		3.27173	-0.802708	down0.5	3.89663	2.74274	spe	6.16905	2.76281	spe	6.66253	3.75209	spe	1.00655	-0.719871		0.0420764	0.0454114
Rpl6	P47911;A0A0J9YU32	P47911	60S ribosomal protein L6	32	32	70.6	70.6	33.509	0	292.55	382760000000	1717	8.59451	5.51298	spe	11.3147	6.38444	spe	7.696	6.32499	spe	0.262504	0.139626		1.63877	-0.673892	down0.5	3.54583	2.65083	spe	6.6997	2.73122	spe	7.74543	3.47479	spe	1.04282	-0.779174		0.119965	0.126694
Rpl27	P61358;A2A4Q0	P61358	60S ribosomal protein L27	15	15	66.9	66.9	15.798	0	234.3	230520000000	596	10.4105	6.99353	spe	13.6872	7.00406	spe	7.02032	7.67668	spe	0.272327	0.220985		2.42364	-0.532095	down0.5	2.58525	2.88506	spe	7.81095	4.31458	spe	1.59112	2.39024	spe	0.730198	1.02566		0.695681	0.36576
Rps7	P62082	P62082	40S ribosomal protein S7	19	19	55.2	55.2	22.127	0	262.15	73559000000	555	8.27466	5.66814	spe	13.1024	5.23432	spe	9.45725	5.34934	spe	0.299588	0.161113		3.47995	-0.726792	down0.5	2.85698	3.10465	spe	2.27703	2.85242	spe	1.65591	2.57318	spe	0.130554	-0.345772		0.0281141	0.0785096
Rplp0	P14869;D3YVM5;S4R1N1	P14869;D3YVM5	60S acidic ribosomal protein P0	11	11	39.7	39.7	34.216	0	310.06	83628000000	394	11.1109	6.10896	spe	15.8827	6.07652	spe	6.93598	6.36797	spe	0.294294	0.24248		3.45889	-0.584308	down0.5	3.82517	2.51972	spe	5.33177	2.91928	spe	1.77021	1.64911	spe	0.963981	0.368941		0.232986	-0.148953
Rpl8	P62918	P62918	60S ribosomal protein L8	31	31	74.7	74.7	28.024	0	323.31	526110000000	1218	5.49389	7.32892	spe	12.5761	7.54854	spe	7.45616	7.28229	spe	0.869714	0.359293		3.57963	-0.715556	down0.5	2.38333	3.05781	spe	4.06022	1.65042	spe	4.01242	2.97468	spe	0.762799	-0.545961		0.212032	-0.188238
Rpl18a	P62717;A0A1D5RM85;A0A1D5RLW5;A0A1D5RM79;A0A1D5RME4;A0A1D5RMC7	P62717;A0A1D5RM85;A0A1D5RLW5;A0A1D5RM79;A0A1D5RME4	60S ribosomal protein L18a	31	31	80.1	80.1	20.732	0	323.31	454340000000	1398	9.88907	8.73234	spe	16.8322	8.1199	spe	11.5116	8.53348	spe	0.0895513	0.0382531		2.80877	-0.56221	down0.5	6.075	4.88526	spe	7.94894	5.02335	spe	4.71152	4.22377	spe	0.168351	-0.198343		0.175935	0.188496
Rpl15	Q9CZM2;B8JKK2	Q9CZM2;B8JKK2	60S ribosomal protein L15;Ribosomal protein L15	25	25	70.6	70.6	24.146	0	234.7	406910000000	1141	6.71884	8.13681	spe	10.4807	7.23027	spe	6.436	7.40357	spe	0.235799	-0.0809387		1.75543	-0.513778	down0.5	4.37231	4.34112	spe	6.02006	3.57894	spe	5.34932	3.87743	spe	0.0622761	0.1171		0.36877	-0.519091
Rpl32	P62911;P17932	P62911	60S ribosomal protein L32	16	16	66.7	66.7	15.86	0	178.97	353640000000	780	10.4291	8.3706	spe	13.4949	7.72528	spe	9.74629	8.25791	spe	0.203804	0.0838772		2.05179	-0.649273	down0.5	3.35979	5.03544	spe	9.27226	4.81759	spe	6.23069	5.75566	spe	0.27114	-0.672778		0.327324	0.703939
Rpl3	P27659;A0A087WQK0;A0A2R8VHN4;A0A087WNS0	P27659	60S ribosomal protein L3	55	52	72.2	69.2	46.109	0	323.31	863120000000	2291	6.57957	7.84193	spe	8.50809	7.41924	spe	12.4209	6.85482	spe	0.0698633	0.0242777		1.83619	-0.617717	down0.5	3.381	3.68294	spe	4.41624	4.494	spe	6.97127	4.08364	spe	0.159723	-0.221497		0.185843	-0.253526
Hist1h1c	P15864;I7HFT9;Q07133	P15864	Histone H1.2	29	10	61.3	24.5	21.266	0	323.31	946320000000	1651	9.14581	8.89486	spe	17.481	8.91301	spe	10.0157	9.47964	spe	0.0614435	0.0321102		2.28351	-0.579704	down0.5	3.96365	3.39308	spe	7.18425	3.21039	spe	8.68876	3.7623	spe	0.236333	-0.178859		0.0937646	0.0684029
H1f0	P10922	P10922	Histone H1.0;Histone H1.0, N-terminally processed	19	19	47.4	47.4	20.861	0	214.2	458830000000	1286	7.44862	7.5836	spe	17.0854	7.84621	spe	10.8237	8.00164	spe	0.159828	-0.0682869		2.87078	-0.533578	down0.5	5.04243	4.39801	spe	6.74468	3.3127	spe	8.93463	4.81932	spe	0.30403	-0.264957		0.433478	-0.3281
Rps25	P62852;A0A1L1SQA8	P62852;A0A1L1SQA8	40S ribosomal protein S25	17	17	68	68	13.742	0	238.18	302160000000	749	5.71405	6.31615	spe	8.03085	6.71713	spe	4.11622	7.31057	spe	1.17663	-0.457297		1.44014	0.337642	up0.3	2.6329	1.78374	spe	1.61352	2.09004	spe	3.49434	2.11463	spe	0.532339	-0.547709		0.430865	-0.510081
Hnrnpa2b1	O88569;A0A0N4SUM2	O88569;A0A0N4SUM2	Heterogeneous nuclear ribonucleoproteins A2/B1	22	21	55.5	55.5	37.402	0	323.31	106670000000	1085	3.83956	4.17375	spe	9.88696	2.93238	spe	7.61436	2.45407	spe	0.0333713	-0.00871245		1.35683	0.467335	up0.3	5.17312	2.01615	spe	3.81735	1.14095	spe	3.37742	1.53918	spe	0.359905	0.127621		0.262008	0.0790809
Hnrnpu	Q8VEK3	Q8VEK3	Heterogeneous nuclear ribonucleoprotein U	60	60	56.6	56.6	87.917	0	323.31	779670000000	2674	6.69033	6.84221	spe	13.3775	6.81815	spe	5.496	6.8075	spe	1.33569	-0.415719	down0.3	2.62904	0.677286	up0.5	2.306	1.07959	spe	2.80661	1.30437	spe	3.0582	1.25251	spe	0.243224	-0.103549		0.136535	0.0466868
Ehmt2	A2CG76;Q9Z148;A2CG77;G3UYH7;H3BIW5	A2CG76;Q9Z148	Histone-lysine N-methyltransferase EHMT2	23	23	22	22	134.69	0	271.95	8290900000	316	2.58912	2.12528	spe	7.04222	3.38523	spe	4.39604	2.92464	spe	0.163952	-0.221157		1.36946	0.869372	up0.5	6.83569	5.30368	spe	8.1304	5.45438	spe	9.86723	5.08845	spe	0.695702	0.494252		0.0602627	-0.0630013
Rpl31	P62900;A0A0A6YX26;A0A0A6YXL3	P62900;A0A0A6YX26;A0A0A6YXL3	60S ribosomal protein L31	15	15	60	60	14.463	0	265.62	513680000000	816	7.12197	7.61145	spe	11.5701	8.21953	spe	8.64414	8.19257	spe	0.238105	0.125099		0.270033	0.101907		4.66461	3.51482	spe	2.89316	2.99569	spe	7.5951	3.23813	spe	0.261467	0.16332		1.15202	-0.47296
Pura	P42669	P42669	Transcriptional activator protein Pur-alpha	31	25	60.7	53.6	34.883	0	323.31	661700000000	1580	13.4318	6.47191	spe	12.457	7.38874	spe	8.12368	7.28216	spe	0.49741	0.30272		0.573413	0.135743		4.69139	3.9874	spe	5.05659	4.92741	spe	6.59896	4.98343	spe	0.427837	-0.202825		1.2728	0.390787
Rps16	P14131	P14131	40S ribosomal protein S16	23	23	82.9	82.9	16.445	0	270.81	846290000000	1707	10.2809	8.38889	spe	12.4327	8.68947	spe	10.1574	8.74705	spe	0.0220155	-0.0131912		0.838342	0.120592		1.66447	1.01093	spe	3.65117	2.95914	spe	2.75779	1.37483	spe	0.524192	-0.409805		1.18998	0.624656
Mobp	Q9D2P8	Q9D2P8	Myelin-associated oligodendrocyte basic protein	6	6	33.5	33.5	19.197	0	11.322	19973000000	237	4.04451	2.61844	spe	4.88279	2.73382	spe	3.75634	2.80341	spe	0.390312	0.0970907		0.120623	0.0392106		2.22385	2.44261	spe	1.51518	2.01256	spe	3.98134	3.37736	spe	1.005	-0.340387		0.821253	0.338373
Rpl19	A2A547;P84099	A2A547;P84099	Ribosomal protein L19;60S ribosomal protein L19	28	28	65.5	65.5	23.247	0	323.31	816030000000	1923	9.59899	5.91366	spe	18.3914	5.95878	spe	10.9735	6.34309	spe	0.367266	-0.092824		0.757815	-0.140153		4.11382	3.21637	spe	7.61846	2.48723	spe	7.4519	3.37038	spe	1.14858	-0.36063		0.189062	0.0853958
Hist1h1e	P43274	P43274	Histone H1.4	6	6	16	16	21.977	0	186.04	343390000000	705	8.39992	7.78632	spe	13.9841	7.94437	spe	8.6202	8.07408	spe	0.290046	0.106601		1.02578	-0.378018		5.44255	2.33191	spe	9.62965	2.28795	spe	8.85173	3.12262	spe	1.00129	-0.378689		0.284543	0.129573
Rpl36	Q6ZWZ4;P47964	Q6ZWZ4;P47964	60S ribosomal protein L36	14	14	44.8	44.8	12.254	0	160.41	236690000000	834	12.1885	8.06633	spe	15.5527	7.07043	spe	8.05755	7.46844	spe	0.0324753	0.0275701		1.29225	-0.332005		3.25479	3.89744	spe	9.49841	4.4518	spe	5.21121	4.71994	spe	1.20451	-0.6015		0.568353	0.231947
Rps4x;Gm15013	P62702;V9GWY0	P62702;V9GWY0	40S ribosomal protein S4, X isoform;40S ribosomal protein S4	35	35	76	76	29.597	0	323.31	513150000000	1747	9.9865	6.40487	spe	11.9585	6.42513	spe	8.94923	6.64408	spe	0.380519	-0.118118		0.797351	-0.17893		4.38707	3.57286	spe	2.15739	2.71967	spe	6.22098	3.6639	spe	1.00794	-0.814967		0.598448	-0.61255
Hist1h1d	P43277	P43277	Histone H1.3	7	3	19.9	9.5	22.099	0	92.709	156650000000	350	7.52738	6.24458	spe	16.2434	6.16252	spe	8.37877	6.88709	spe	0.102256	-0.0714137		1.05728	-0.34427		8.06817	5.83961	spe	9.10142	5.78321	spe	8.11643	6.5376	spe	1.06786	-0.774797		0.889945	0.452858
Rpl39	P62892	P62892	60S ribosomal protein L39	3	3	37.3	37.3	6.4066	0	34.736	128010000000	217	9.27527	7.22938	spe	14.1846	6.88935	spe	9.96549	7.16939	spe	0.49957	0.13926		0.20586	-0.0610799		1.42774	2.87164	spe	1.55643	2.94561	spe	1.56815	2.98119	spe	0.0251998	-0.115948		0.103224	0.438168
Mtdh	Q80WJ7;F6QHD1;F6QFT1;E9PUX0	Q80WJ7;F6QHD1;F6QFT1	Protein LYRIC	25	7	51.1	10.5	63.845	0	323.31	54796000000	626	6.24293	5.5904	spe	13.4181	5.76444	spe	9.23385	5.94861	spe	0.430675	-0.139137		0.947465	-0.196121		5.53791	2.87374	spe	2.56026	1.70437	spe	2.26697	2.27609	spe	0.553349	0.765461		0.561432	-0.492867
Zc2hc1a	Q8BJH1	Q8BJH1	Zinc finger C2HC domain-containing protein 1A	33	33	78.1	78.1	35.152	0	323.31	140670000000	1165	8.78727	7.03461	spe	12.9518	6.98322	spe	10.203	7.50606	spe	0.325867	-0.137601		0.418913	-0.136822		1.88471	2.07493	spe	1.63403	1.62124	spe	2.62607	2.64556	spe	0.201083	-0.325757		0.0747752	-0.123221
Rps19	Q9CZX8;D3YUT3;D3Z722;D3Z5R8;D3YUG3;S4R223	Q9CZX8;D3YUT3;D3Z722;D3Z5R8;D3YUG3	40S ribosomal protein S19	28	28	84.8	84.8	16.085	0	323.31	1014400000000	1870	8.91806	9.83855	spe	14.2943	10.5059	spe	13.233	10.0818	spe	0.73641	-0.162364		0.0101174	-0.00250498		4.4679	2.0675	spe	3.11612	2.51071	spe	3.01665	1.0589	spe	0.85479	0.43438		0.0396534	0.0426763
H3f3a;Hist1h3b;Hist1h3a;H3f3c	F8WI35;A0A1W2P768;P84244;P84228;P68433;P02301;E0CZ27;E0CYR7;E0CYN1	F8WI35;A0A1W2P768;P84244;P84228;P68433;P02301;E0CZ27	Histone H3;Histone H3.3;Histone H3.2;Histone H3.1;Histone H3.3C	9	9	33.3	33.3	15.199	0	22.724	35003000000	265	7.80535	3.66769	spe	6.85797	3.42127	spe	3.06697	3.2322	spe	0.245581	0.402934		0.595965	-0.0961846		2.61198	4.15411	spe	9.15649	5.71143	spe	3.0209	4.00021	spe	0.149881	-0.118153		0.199755	0.137547
Rpl23a	P62751	P62751	60S ribosomal protein L23a	21	21	69.9	69.9	17.695	0	252.55	451220000000	1199	6.92866	7.04456	spe	13.1396	6.59707	spe	6.36234	7.70871	spe	0.13726	0.0923916		0.579648	-0.30081		4.8915	4.28267	spe	6.45174	3.97659	spe	3.06752	3.95958	spe	0.0317522	-0.0639248		0.28938	0.299813
H1fx	Q80ZM5	Q80ZM5		20	20	68.6	68.6	20.151	0	222.01	71766000000	634	7.65964	5.74026	spe	13.2575	5.89917	spe	7.80988	5.6982	spe	0.408555	-0.16537		0.0379589	0.0166251		4.52289	3.04805	spe	5.29539	2.9896	spe	3.1721	2.51394	spe	0.682017	0.826128		0.169337	0.159104
Rpl7a	P12970;V9GX35	P12970	60S ribosomal protein L7a	37	37	66.5	66.5	29.976	0	323.31	654400000000	1473	6.82705	7.62265	spe	9.27046	7.85597	spe	8.41501	8.38622	spe	0.574573	-0.407641		0.174971	0.123907		2.58287	4.38407	spe	2.263	3.26913	spe	3.37558	4.22156	spe	0.315032	-0.531716		0.0771201	-0.129007
Rpl24	Q8BP67	Q8BP67	60S ribosomal protein L24	25	25	72.6	72.6	17.779	0	292.82	466430000000	1212	7.94004	7.76017	spe	16.0216	8.57027	spe	10.7198	8.71754	spe	0.056189	-0.0325979		0.485728	-0.0780207		2.12007	2.11952	spe	6.33672	1.49243	spe	3.57406	3.71323	spe	0.782694	-0.531179		0.0357672	-0.0350542
Srpk2	A0A0R4J124;O54781;Q6P5E1;Q9Z0G2;A0A0G2JDY2;A0A0G2JEI1;A0A0G2JDT6;A0A0G2JG74	A0A0R4J124;O54781	SRSF protein kinase 2;SRSF protein kinase 2 N-terminal;SRSF protein kinase 2 C-terminal	21	17	25.7	21.6	76.884	0	171.4	34023000000	465	9.02043	5.29097	spe	9.49562	4.66539	spe	8.43988	5.76375	spe	0.122938	0.0849559		0.863974	-0.576855		2.12303	1.81914	spe	2.56685	1.33315	spe	4.18343	2.03103	spe	0.441444	-0.362002		0.345758	-0.337754
Hist1h2bc;Hist1h2bh;Hist2h2bb;Hist1h2bm	Q6ZWY9;Q64478;Q64525;P10854	Q6ZWY9;Q64478;Q64525;P10854	Histone H2B type 1-C/E/G;Histone H2B type 1-H;Histone H2B type 2-B;Histone H2B type 1-M	16	1	78.6	5.6	13.906	0	165.08	309970000000	925	4.3378	5.03554	spe	17.1108	5.09445	spe	4.94827	6.4257	spe	0.501676	-0.206995		0.0333083	0.0155596		1.83022	1.46182	spe	3.31814	2.20463	spe	4.44073	2.34735	spe	0.643981	-0.571857		0.0117784	0.0134093
Rpl36a	P83882;A0A2I3BPG9;A0A0A6YW33;E9Q131	P83882;A0A2I3BPG9	60S ribosomal protein L36a	20	20	68.9	68.9	12.441	0	203.59	184030000000	919	3.68052	5.74191	spe	10.3935	6.56912	spe	9.38316	7.234	spe	0.746463	-0.409436		0.547949	-0.408181		3.786	4.28434	spe	2.45144	2.36192	spe	4.61543	4.62965	spe	0.945483	-0.786374		0.359236	-0.394398
Rps23	P62267	P62267	40S ribosomal protein S23	13	13	47.6	47.6	15.807	0	72.186	192810000000	727	6.75673	5.92352	spe	9.78122	6.23772	spe	8.45155	6.81888	spe	0.86318	-0.456964		0.0967606	0.066422		2.3942	3.02042	spe	6.01458	4.48708	spe	4.74739	4.16602	spe	0.471025	-0.499067		0.0503925	0.0798057
Rpl34	Q9D1R9;A0A0G2JEY6;A0A0G2JGY8	Q9D1R9;A0A0G2JEY6;A0A0G2JGY8	60S ribosomal protein L34	15	15	57.3	57.3	13.293	0	111.49	274690000000	775	8.39766	6.787	spe	12.7683	7.6314	spe	7.40414	7.71758	spe	0.83302	-0.301712		0.551547	-0.243232		2.0242	1.67569	spe	6.88952	1.4383	spe	5.83409	2.72244	spe	0.475976	-0.539129		0.0948002	-0.12463
Hnrnpr	Q8VHM5;F7B5B5;A2AW41;S4R1E9;A2AW40;V9GWW3	Q8VHM5;F7B5B5;A2AW41		40	32	49.8	42.4	70.887	0	323.31	255070000000	1477	11.0585	7.2139	spe	14.3813	8.04965	spe	8.87049	8.37644	spe	0.161313	-0.0378869		1.46258	0.193765		3.121	1.12069	spe	5.38292	1.20932	spe	5.95492	1.83671	spe	0.27184	-0.120876		0.0561493	-0.0208696
Rps9	Q6ZWN5;F7CJS8;D3YWH9;Q9CXW7;D3Z673;D3YUV6	Q6ZWN5;F7CJS8;D3YWH9;Q9CXW7	40S ribosomal protein S9	26	26	65.5	65.5	22.591	0	251.22	412460000000	1105	8.65614	7.92378	spe	14.8104	8.18984	spe	9.67001	8.70423	spe	0.246071	-0.149081		0.0045537	0.00249142		5.36244	3.26315	spe	6.85459	2.24629	spe	6.4365	3.435	spe	0.680207	-0.3217		0.619749	-0.312542
Rps3a	P97351	P97351	40S ribosomal protein S3a	42	42	76.9	76.9	29.885	0	323.31	1278200000000	2528	8.62835	7.47109	spe	18.1543	7.70384	spe	12.3995	7.98202	spe	0.830488	-0.196122		0.613279	0.131614		5.07222	3.16168	spe	6.48906	2.46595	spe	8.46647	3.31028	spe	0.233164	-0.176696		0.277244	-0.206936
Rps6	P62754	P62754	40S ribosomal protein S6	31	31	56.6	56.6	28.68	0	323.31	714160000000	1970	12.3219	6.95699	spe	15.9376	6.77899	spe	11.9716	6.95309	spe	0.184386	-0.0409034		0.284238	0.0520713		4.72001	2.36321	spe	7.20307	2.06944	spe	8.6925	2.96923	spe	0.75699	-0.411875		0.347347	-0.236348
Tra2b	P62996;F8WJG3;A0A0R4J1X8	P62996;F8WJG3	Transformer-2 protein homolog beta	7	6	22.2	18.8	33.665	0	48.841	5430400000	172	1.44097	1.32844	spe	1.35802	1.18676	spe	0.546645	0.577145		0.581473	0.711883		0.0767665	-0.136494		3.64072	2.60703	spe	2.45078	1.94118	spe	4.97269	2.52052	spe	1.10585	-0.198881		0.487914	-0.300409
Mapk3	Q63844;D3Z3G6;D3Z6D8;A0A0U1RPX4	Q63844;D3Z3G6;D3Z6D8;A0A0U1RPX4	Mitogen-activated protein kinase 3;Mitogen-activated protein kinase	9	6	22.6	16.1	43.066	0	22.28	6266800000	237	1.85036	1.42689	spe	4.19901	1.69643	spe	1.55289	1.46499	spe	0.344879	0.310206		1.75529	0.272916	up0.2	3.57818	2.50192	spe	1.33467	1.19976	spe	3.08839	2.24475	spe	1.15994	0.556521		0.7375	-0.587909
Aldh2	P47738;A0A0G2JEU1;A0A0G2JF60;A0A0G2JFQ0;D3YYF3	P47738;A0A0G2JEU1	Aldehyde dehydrogenase, mitochondrial	14	14	22.4	22.4	56.537	0	121.88	5733900000	267	2.27769	1.23889	spe	9.32956	2.56122	spe	0.980505	1.07684		1.93653	1.75093	up1	0.245723	0.150278		4.51311	1.80655	spe	4.35928	1.25177	spe	4.86534	1.76548	spe	0.349881	0.222205		0.389188	-0.205534
Ogdh	Z4YJV4;Q60597	Z4YJV4;Q60597	2-oxoglutarate dehydrogenase, mitochondrial	14	11	17.4	14.3	116.03	0	58.373	10316000000	232	3.3624	2.34843	spe	2.33396	1.80407	spe	0.319576	-0.468373		0.606733	0.57652		0.191869	0.0860333		2.93781	3.73227	spe	2.10071	2.58016	spe	2.6914	3.33239	spe	0.0463725	-0.125001		0.00395391	0.0104742
Map7d1	A2AJI0;F6WF36	A2AJI0;F6WF36	MAP7 domain-containing protein 1	59	1	61.1	3	93.275	0	323.31	119100000000	1533	5.25623	4.70212	spe	14.9745	7.73412	spe	7.32208	7.06272	spe	1.46612	-1.64671	down1	4.34351	2.42397	up1	1.88386	1.14769	spe	0.0125256	0.01384		4.89376	2.05708	spe	3.65924	-1.44205	down1	1.14724	-0.572005
Dgkz	A2AHJ7;A2AHK0;Q80UP3;D6RHK9	A2AHJ7;A2AHK0;Q80UP3	Diacylglycerol kinase;Diacylglycerol kinase zeta	26	23	30.4	26.6	105.9	0	178.25	31244000000	554	7.36654	4.60036	spe	12.0219	4.80213	spe	9.04351	5.03757	spe	0.180214	0.0540711		0.0509797	-0.0160531		2.39171	1.99684	spe	0.00377724	0.00820414		6.74842	3.72054	spe	1.88247	-1.47532	down1	0.395419	-0.7095
Srsf4	Q542V3;Q8VE97;A0A0A6YWA5	Q542V3;Q8VE97	Serine/arginine-rich splicing factor 4	16	13	23	19.8	56.248	0	89.952	24226000000	341	6.54237	4.32483	spe	11.5093	3.98777	spe	5.51286	4.26182	spe	0.998754	0.562936		2.44269	-0.642623	down0.5	1.64248	1.37708	spe	0.977966	1.04659		4.5863	1.36492	spe	0.237317	-0.205272		0.517924	-0.368513
Arhgef2	H3BJU7;H3BJ45;H3BJ40;H3BKH9;H3BJX8;Q60875;H3BLF9;H3BJ59;H3BL15;H3BIX8;H3BLJ1;H3BJM4;H3BJ48	H3BJU7;H3BJ45;H3BJ40;H3BKH9;H3BJX8;Q60875	Rho guanine nucleotide exchange factor 2	39	39	38.6	38.6	108.59	0	323.31	32899000000	632	3.12178	2.86986	spe	7.55363	5.18194	spe	5.71488	4.12652	spe	1.19115	-1.37589		1.48676	1.80873	up1	1.54433	1.00875	spe	1.1228	0.362066		3.80548	1.07737	spe	0.131119	0.118659		0.290549	-0.214609
Srsf6	Q3TWW8;A0A0A6YXX6	Q3TWW8	Serine/arginine-rich splicing factor 6	5	5	15.9	15.9	39.025	0	29.31	8994700000	188	4.40638	2.45887	spe	7.15735	3.20573	spe	5.87889	3.36976	spe	0.217255	0.0423641		0.335612	-0.0558267		1.43155	1.52393	spe	0.171315	0.252152		6.29366	3.53782	spe	1.27048	-1.37779		0.54976	-0.849375
Gpd2	Q64521;A2AQR0	Q64521;A2AQR0	Glycerol-3-phosphate dehydrogenase, mitochondrial;Glycerol-3-phosphate dehydrogenase	20	20	28.2	28.2	80.953	0	81.906	8140600000	384	1.32804	1.07525	spe	0.153279	-0.0682087		0.200671	0.258082		0.118519	0.0579096		0.779227	0.166347		2.00643	2.57393	spe	0.30034	0.511438		2.19661	1.67881	spe	0.326534	-0.464894		0.872091	-1.39616
Hnrnph1	Q8C2Q7;O35737	Q8C2Q7;O35737	Heterogeneous nuclear ribonucleoprotein H;Heterogeneous nuclear ribonucleoprotein H, N-terminally processed	17	6	38.8	14	51.217	0	323.31	43183000000	489	7.27392	4.99526	spe	13.2219	4.93287	spe	8.5793	5.29908	spe	0.721106	-0.470834		0.144113	0.0878902		4.33901	1.35599	spe	2.36332	1.04407	spe	1.27105	0.40913		2.38148	0.542133	up0.5	0.623987	-0.166754
Idh3g	P70404	P70404	Isocitrate dehydrogenase [NAD] subunit gamma 1, mitochondrial	8	8	28.8	28.8	42.785	0	155.28	5056700000	129	4.05274	2.2228	spe	4.86292	2.18858	spe	1.79144	1.3215	spe	1.20678	0.948113		0.154719	-0.16427		2.25188	1.90095	spe	4.46231	2.01554	spe	0.757545	-0.913532		2.85568	1.87156	up1	0.181544	0.146948
Ybx1	P62960;A2BGG7;A0A0A0MQD2;B2RUF0;Q9Z2C8	P62960;A2BGG7	Nuclease-sensitive element-binding protein 1	17	11	75.5	64.6	35.73	0	323.31	56097000000	616	7.41403	5.58342	spe	17.2576	6.31209	spe	9.21345	5.90947	spe	0.18052	-0.0678511		0.907116	0.20234		3.06353	1.50149	spe	2.25688	1.77951	spe	0.535584	0.468554		1.80115	1.12182	up1	0.199262	0.193323
Hist2h2ac;Hist2h2aa1	Q64523;Q6GSS7	Q64523;Q6GSS7	Histone H2A type 2-C;Histone H2A type 2-A	8	2	41.1	14	13.988	0	145.25	110410000000	314	11.4271	6.61411	spe	13.9691	6.30767	spe	7.59001	6.75297	spe	1.05498	0.70926		2.26969	-0.468454	down0.3	2.30754	3.78998	spe	7.18406	5.52517	spe	0.311426	1.01837		0.218229	0.79154		1.2358	2.25731
Fbl	P35550;A0A140LIR6	P35550	rRNA 2-O-methyltransferase fibrillarin	14	12	43.1	35.5	34.306	0	86.402	28809000000	426	5.88013	4.50059	spe	15.9311	4.76092	spe	6.66143	4.66101	spe	0.0210233	0.00496197		1.52063	-0.345964	down0.3	1.39842	1.35985	spe	2.24952	1.72958	spe	1.02377	1.34548		0.625854	0.923957		0.0249795	0.0384874
Rpl9	P51410;A0A140T8T4;D3Z629;A0A0G2JES3;D3YZT0;A0A0G2JFQ3;S4R1R7	P51410;A0A140T8T4;D3Z629;A0A0G2JES3;D3YZT0	60S ribosomal protein L9	16	16	47.9	47.9	21.881	0	181.99	61591000000	383	8.14016	6.0612	spe	11.4899	4.46221	spe	8.48254	5.55073	spe	0.569082	0.356751		5.21026	-1.53782	down1	2.10676	2.00768	spe	1.82732	1.77619	spe	1.28143	1.51074		0.105718	0.238194		0.0114039	-0.0261898
U2af2	Q80XR5;P26369;Q3KQM4;A0A140LJK3;A0A140LJ08	Q80XR5;P26369	Splicing factor U2AF 65 kDa subunit	11	11	30.4	30.4	53.12	0	83.553	20494000000	382	4.31139	2.81326	spe	11.3565	2.81665	spe	4.8476	3.71777	spe	0.606087	0.17249		0.384295	-0.136731		2.08314	1.68386	spe	2.98447	2.97199	spe	0.806018	1.26159		0.137655	0.302052		0.409112	0.669531
Slc4a4	E9Q8N8;O88343;A7E1Z5;D3Z7G8;A0A571BE55;D3YVG0;D3YX36;E9Q3M5	E9Q8N8;O88343;A7E1Z5	Anion exchange protein;Electrogenic sodium bicarbonate cotransporter 1	8	8	11.4	11.4	123.08	0	129.89	4490600000	110	2.86854	1.48037	spe	6.41313	2.53203	spe	1.51257	1.37895	spe	1.07705	0.948345		0.397132	0.0466917		3.4111	1.92482	spe	NaN	0		NaN	0		3.05432	1.32712	up1	1.68066	-1.08962	down1
Hnrnpk	B2M1R6;P61979;H3BLL4;H3BKD0;A0A286YDM3;H3BK96;H3BKI8;A0A286YCM2;A0A286YEC4;H3BLP7;Q8BT23;A0A286YDH1;H3BJ43;A0A286YE41;H3BJS9	B2M1R6;P61979;H3BLL4;H3BKD0	Heterogeneous nuclear ribonucleoprotein K	21	21	45.7	45.7	48.562	0	213.91	30096000000	630	5.44499	3.28198	spe	5.40824	2.5841	spe	4.32999	2.67689	spe	1.38432	0.378213	up0.3	0.212953	-0.101236		4.90949	3.52191	spe	0.784358	0.930768		0.845758	1.07059		1.0846	0.52994		1.50882	-1.10022	down1
Hnrnph2	P70333	P70333	Heterogeneous nuclear ribonucleoprotein H2	7	7	21.8	21.8	49.279	0	148.15	8334800000	166	5.62395	2.02446	spe	9.53099	2.0285	spe	5.68462	3.10873	spe	1.67836	-0.469353	down0.3	0.466379	-0.174276		2.72791	1.9723	spe	1.22386	1.03176		0.391093	0.424203		2.17771	1.1974	up1	0.95727	-0.871827
Ppp2r1a	Q76MZ3;H3BLQ0;H3BLE7;Q3TTF6;H3BKU1;G3UWS4;Q7TNP2;G3UWL2;H3BIV7	Q76MZ3	Serine/threonine-protein phosphatase 2A 65 kDa regulatory subunit A alpha isoform	12	12	23.3	23.3	65.322	0	43.266	4820200000	176	4.24986	1.60892	spe	7.71627	1.65898	spe	2.95292	1.58279	spe	0.476482	0.318559		0.0518241	0.00979487		2.93089	2.44556	spe	0.718883	0.978055		0.0685533	-0.137999		1.5045	1.56306	up1	0.4623	-0.564234
Fxr2	Q6P5B5;Q9WVR4	Q6P5B5;Q9WVR4	Fragile X mental retardation syndrome-related protein 2	18	15	42.1	37.8	74.252	0	291.99	24356000000	422	9.05193	4.43069	spe	10.8942	4.36527	spe	7.10035	4.59514	spe	0.643976	0.161444		3.97102	-0.480233	down0.3	5.08426	1.55164	spe	NaN	0		NaN	0		1.26226	0.549447		0.939761	-0.651637
Psd3	E9PUC5;F6Z9E6;A0A1D5RLK2;A0A1D5RMH7;Q2PFD7;Q8C0E9	E9PUC5;F6Z9E6;A0A1D5RLK2;A0A1D5RMH7;Q2PFD7;Q8C0E9	PH and SEC7 domain-containing protein 3	26	26	64.4	64.4	42.299	0	206.13	54875000000	893	6.47094	3.24767	spe	4.08132	2.00704	spe	4.53245	3.66978	spe	0.0800642	0.0663328		3.10925	-1.1147	down1	2.00191	1.12133	spe	0.0898862	0.0802898		0.259572	-0.184531		0.101247	0.0837084		0.218333	-0.138157
Xrn2	Q9DBR1	Q9DBR1	5-3 exoribonuclease 2	9	9	12.2	12.2	108.69	0	52.402	7125800000	154	6.46374	2.30026	spe	7.76483	2.58889	spe	4.48174	3.07958	spe	1.47531	-0.357336	down0.3	2.70089	0.430549	up0.3	2.1687	1.13079	spe	NaN	0		1.05313	0.721466		0.112958	0.127822		0.0296413	0.0343873
Snx27	Q3UHD6;A0A0G2JG07;A0A0G2JF85;Q91VY6	Q3UHD6	Sorting nexin-27	7	7	15	15	60.988	0	36.837	4504100000	107	1.52696	1.09675	spe	7.00862	2.3854	spe	3.19125	2.03335	spe	0.39032	-0.442918		1.43416	0.752347	up0.5	1.8446	1.30687	spe	0.607619	0.633462		NaN	0		0.100677	0.124811		0.0915213	-0.126878
Pabpc1;Pabpc6	P29341;Q9D4E6;Q62029;A2A5N3;A0A2I3BR37;F6ZAX1;V9GXG3	P29341;Q9D4E6	Polyadenylate-binding protein 1;Polyadenylate-binding protein	20	15	28.8	20.6	70.67	0	92.323	11882000000	295	5.59869	3.30984	spe	9.46323	3.62909	spe	6.65467	2.88255	spe	3.10997	0.531099	up0.5	0.520829	-0.266357		2.19816	1.51143	spe	0.783369	-0.97593		0.726434	0.93909		0.271897	-0.324917		0.282372	-0.340802
Ssb	P32067;F6SXM5;A2AR07;D6RI87	P32067;F6SXM5	Lupus La protein homolog	26	26	43.6	43.6	47.756	0	273.79	89917000000	730	7.69254	5.45302	spe	13.6375	5.95158	spe	9.8451	6.45785	spe	0.272567	0.0489324		0.280674	-0.0907124		3.76868	1.94372	spe	1.33915	0.846645		0.77809	0.738276		1.12017	1.07117		0.952969	-0.735214
Amer2	Q8CCJ4;A0A0R4J030;A0A286YCG0	Q8CCJ4;A0A0R4J030;A0A286YCG0	APC membrane recruitment protein 2	13	13	21.3	21.3	69.932	0	37.477	4139400000	227	3.75412	1.21023	spe	6.64986	1.50221	spe	3.15537	1.97252	spe	0.809367	-0.193174		0.437259	0.0815536		4.78006	2.4635	spe	0.00504994	-0.00889492		0.647571	0.679421		0.213299	0.212368		1.16254	-0.900694
H2afy	Q9QZQ8	Q9QZQ8	Core histone macro-H2A.1	11	9	42.5	35.5	39.735	0	172.21	9338200000	166	5.36359	2.89132	spe	12.5321	3.48367	spe	4.00964	2.899	spe	0.0699629	-0.0859518		0.394176	0.195583		1.78308	1.84687	spe	0.450457	-0.449383		0.465589	0.532797		0.289742	0.497541		0.561882	-0.758793
Psip1	Q99JF8	Q99JF8	PC4 and SFRS1-interacting protein	15	1	29	5.3	59.696	0	323.31	19074000000	327	7.32468	4.32303	spe	13.6661	4.30953	spe	6.31813	4.7976	spe	0.00532704	-0.00499249		0.335764	-0.0829367		2.1015	1.41142	spe	NaN	0		0.530883	0.678276		0.142193	0.171418		0.443535	-0.36025
Hnrnpl	G5E924;Q8R081;G3UY38;G3UY56;G3UYY3	G5E924;Q8R081;G3UY38	Heterogeneous nuclear ribonucleoprotein L	24	24	50.7	50.7	66.821	0	289.27	27559000000	371	7.26603	4.17378	spe	8.09462	4.58037	spe	8.20806	3.99679	spe	0.467752	0.165489		0.325113	0.322171		1.83766	2.11024	spe	0.744346	1.10342		0.732648	1.58669		0.506041	-1.24615		0.23687	0.585008
Ap2s1	P62743;A0A0U1RPS0;A0A0U1RQ06	P62743	AP-2 complex subunit sigma	3	3	16.9	16.9	17.018	0	5.7709	6150800000	140	5.61553	1.99185	spe	1.33023	1.01566	spe	1.29503	1.41955	spe	1.00549	1.03475		1.72595	-1.29693	down1	1.60325	1.61536	spe	0.055475	0.0813993		NaN	0		0.41536	0.556618		0.344997	-0.556407
Osbpl6	F8WIZ7;Q8BXR9;V9GXX3;F8VQM4;A2A716;A0A3Q4EGW0	F8WIZ7;Q8BXR9	Oxysterol-binding protein;Oxysterol-binding protein-related protein 6	20	19	25	24.1	109.72	0	98.354	4641300000	304	1.72495	0.712919		1.95924	1.00139	spe	0.992937	0.773369		0.501399	0.389105		0.0917599	-0.0830292		5.96941	4.37646	spe	6.57685	2.24883	spe	10.2082	3.70764	spe	2.32747	-0.437438	down0.3	1.16137	-0.292991
Cuta	D5MCW4;Q9CQ89	D5MCW4;Q9CQ89	Protein CutA	4	4	24	24	16.453	0	43.764	21650000000	133	0.457754	0.992671		5.64407	4.06804	spe	1.06117	2.15069		0.254034	-0.904923		1.89315	2.97529	up1	6.3072	5.85885	spe	7.34187	5.17692	spe	4.03816	3.79059	spe	1.60907	1.811	up1	0.359	-0.380753
Fn3krp	Q8K274	Q8K274	Ketosamine-3-kinase	7	7	23.3	23.3	34.468	0	27.626	4126800000	117	0.745538	1.39304		1.47284	1.52305	spe	2.89522	2.72512	spe	0.507146	-1.15237		0.0121117	-0.0367672		7.89613	4.32402	spe	4.45619	3.3741	spe	5.90988	3.86833	spe	0.371774	0.115779		2.36734	-0.395592	down0.3
Wiz	G5E8J8;F6ZBR8;A0A494BAG6;O88286	G5E8J8;F6ZBR8;A0A494BAG6;O88286	Protein Wiz	9	9	12.1	12.1	102.93	0	35.267	622440000	73	NaN	0		NaN	0		NaN	0		NaN	0		NaN	0		7.15299	3.29651	spe	5.61397	1.79667	spe	7.70939	3.42936	spe	0.054321	-0.0290419		1.84896	-0.358103	down0.3
Syngr1	O55100	O55100	Synaptogyrin-1	2	2	9.4	9.4	25.652	0	8.9269	3054100000	162	NaN	0		NaN	0		NaN	0		NaN	0		NaN	0		8.40777	4.19213	spe	3.322	3.08235	spe	2.21574	3.18066	spe	3.6622	-0.391427	down0.3	0.563062	-0.591213
Prkca	Q4VA93;P20444;Q3TQ39	Q4VA93;P20444	Protein kinase C;Protein kinase C alpha type	7	7	13.2	13.2	76.823	0	57.951	1973000000	110	0.483782	0.628121		0.100467	0.107407		NaN	0		0.315776	0.459202		0.388605	-0.506465		2.10957	1.67573	spe	5.93567	2.48688	spe	3.05145	1.60413	spe	1.04619	-0.848742		1.03101	0.851013
Napb	P28663;D6RHL2	P28663;D6RHL2	Beta-soluble NSF attachment protein	8	6	31.9	20.5	33.557	0	56.192	4315700000	296	0.90856	-1.08579		7.4544	-2.87106		2.50083	-1.94257		0.628562	0.847288		0.940069	-0.905634		7.00384	1.71795	spe	4.0853	1.19399	spe	6.65627	1.86741	spe	1.16626	-0.264247		0.635077	-0.212838
Dnm1l	Q8K1M6;A0A2U3TZ67	Q8K1M6;A0A2U3TZ67	Dynamin-1-like protein	13	2	23	7	82.657	0	84.826	1422200000	154	0.788112	-0.601946		NaN	0		0.717089	-0.701085		NaN	0		NaN	0		1.76403	1.6433	spe	1.89934	1.05589	spe	1.34734	1.15357	spe	0.142412	-0.0510028		0.546265	-0.174098
Slc6a11	P31650	P31650	Sodium- and chloride-dependent GABA transporter 3	7	7	11.5	11.5	69.96	0	28.214	7387400000	280	6.11546	-1.22186		3.71749	-1.2328		0.973757	-0.972446		0.123289	0.092165		0.263164	0.0666776		1.51991	1.74326	spe	1.77366	2.33034	spe	1.59925	1.71716	spe	0.226218	0.160745		0.104846	-0.0744969
Sfxn5	Q925N0;Q8BRQ9;D3YXH5	Q925N0;Q8BRQ9;D3YXH5	Sideroflexin-5;Sideroflexin	3	3	14.9	14.9	37.328	0	131.96	1443600000	80	NaN	0		NaN	0		0.0362725	0.0521167		0.217867	-0.271227		NaN	0		2.68377	2.57377	spe	8.76666	2.82085	spe	1.82456	1.91787	spe	0.425838	-0.527748		0.71769	0.800465
Dmtn	Q9WV69	Q9WV69	Dematin	8	8	22.2	22.2	45.468	0	24.362	2236900000	170	3.19639	-2.23086		4.5227	-2.21019		1.0974	-1.20998		NaN	0		NaN	0		1.29867	1.67662	spe	2.35115	1.76751	spe	2.2841	2.20276	spe	0.591667	-0.594313		0.225664	0.274054
Fn3k	Q9ER35;Q6P264;Q7TQJ3	Q9ER35;Q6P264;Q7TQJ3	Fructosamine-3-kinase	6	6	22.7	22.7	35.032	0	29.772	892840000	44	NaN	0		NaN	0		NaN	0		NaN	0		NaN	0		1.69186	2.20241	spe	1.98088	1.97604	spe	2.3083	2.30528	spe	0.0820087	0.20795		0.120069	-0.301011
Mtch1	Q791T5;A0A3Q4EC97;A0A3Q4EG99;A0A3Q4EBT8;D3YXC2;A0A3Q4EC24;A0A3Q4EGL4	Q791T5;A0A3Q4EC97	Mitochondrial carrier homolog 1	4	4	9.3	9.3	41.565	0	12.797	2164800000	122	0.285539	-0.333186		0.359459	0.446737		1.2504	-0.730586		0.335165	0.344265		0.594457	0.689917		2.49581	2.06645	spe	3.54888	2.66339	spe	2.71106	2.35284	spe	0.133952	-0.222735		0.593788	0.789785
Spr	G3UXX3;Q91XH5;Q64105;G3UZ79	G3UXX3;Q91XH5;Q64105;G3UZ79	Sepiapterin reductase	4	4	21.9	21.9	23.357	0	10.836	656490000	86	NaN	0		NaN	0		NaN	0		NaN	0		NaN	0		1.61762	1.36454	spe	1.76412	1.38898	spe	2.79928	1.67999	spe	0.571782	-0.582309		0.245026	0.358831
Dhrs4	A0A2I3BRG8;Q99LB2;A0A2I3BQ25;A0A2I3BPY3;Q9D2U3	A0A2I3BRG8;Q99LB2;A0A2I3BQ25;A0A2I3BPY3;Q9D2U3	Dehydrogenase/reductase SDR family member 4	5	5	17.9	17.9	19.225	0	41.121	1237800000	55	NaN	0		NaN	0		NaN	0		NaN	0		NaN	0		3.19907	2.9545	spe	6.08198	3.43779	spe	5.51088	3.82909	spe	0.332708	-0.454676		0.388694	0.522275
Ehmt1	A0A0H2UH19;Q5DW34;E9Q5A3;A0A1B0GXE2;A0A0G2JFI9;F6WWY8;A0A140LII4;A0A0A6YXD1;A0A0A6YWA0	A0A0H2UH19;Q5DW34;E9Q5A3	Histone-lysine N-methyltransferase EHMT1	21	2	16.7	1.2	141.25	0	176.61	3488500000	188	0.00173174	0.00521978		0.668906	0.55722		0.358729	0.608315		0.0632134	0.211751		0.0413909	-0.108891		8.82113	4.33552	spe	6.39208	4.06283	spe	6.12595	4.69342	spe	0.391118	-0.19899		0.620566	0.217792
Kcnab2	A0A571BGH0;P62482;Q3UPV6;E0CYS2;E0CXI4;E0CXZ9;A0A571BF54;A0A571BEM7	A0A571BGH0;P62482;Q3UPV6;E0CYS2;E0CXI4;E0CXZ9;A0A571BF54;A0A571BEM7	Voltage-gated potassium channel subunit beta-2	4	4	9.4	9.4	42.734	0	17.219	8055300000	184	0.176254	0.402975		0.933793	0.898064		1.13509	1.44094		0.396804	-0.729934		0.137725	0.293479		2.13417	2.04644	spe	1.84994	0.28091		5.74409	1.30455	spe	1.56601	-0.372233	down0.3	0.0608191	-0.0218512
Amph	A0A0G2JEG8;Q7TQF7;S4R2J8;S4R270;A0A5F8MQ05;D3Z6Q9;S4R1B8;S4R1Q1;S4R171	A0A0G2JEG8;Q7TQF7	Amphiphysin	14	11	22.5	20	75.339	0	105.79	6291500000	376	4.72486	-0.885261		2.31657	-1.36869		2.45299	-0.509499		0.760944	0.174422		0.677933	-0.654999		5.28745	1.05209	spe	0.517829	0.507315		1.87515	1.28132	spe	0.166919	-0.0525338		1.64332	-0.454762	down0.3
Usp5	P56399;Q3U4W8;D3YYA5	P56399;Q3U4W8	Ubiquitin carboxyl-terminal hydrolase 5;Ubiquitin carboxyl-terminal hydrolase	4	4	6.4	6.4	95.832	0	29.552	728070000	80	0.543059	-0.5408		0.31066	-0.23246		NaN	0		NaN	0		NaN	0		2.20951	1.56416	spe	1.11762	-1.07158		1.54814	1.3301	spe	0.0518186	-0.063529		2.0536	-1.49187	down1
Srrm1	A2A8V8;A2A8V9;E9PUK6;Q52KI8;E9QKA4;A2A983;F6T4M4;F6UK16	A2A8V8;A2A8V9;E9PUK6;Q52KI8;E9QKA4	Serine/arginine repetitive matrix protein 1	9	9	11.3	11.3	102.66	0	59.849	1226700000	108	NaN	0		NaN	0		NaN	0		NaN	0		NaN	0		2.72052	2.47547	spe	0.709332	0.829037		2.4276	1.94221	spe	1.6568	-0.475728	down0.3	0.753929	-0.645187
Echs1	Q8BH95	Q8BH95	Enoyl-CoA hydratase, mitochondrial	5	5	15.9	15.9	31.474	0	41.569	2071100000	109	0.411415	-0.529567		0.184109	-0.161869		NaN	0		0.383605	0.454494		0.219611	0.268496		2.55069	1.99694	spe	1.40136	0.74752		1.49202	1.34387	spe	0.136759	0.183804		1.02191	-0.703251
Mark2	Q05512;E9QMP6;A0A0R4J0B1;A0A0R4J227;E9PYX3;E9Q9N6;F6ZS70;Q3T9A3;F7CVZ7;F6ZEX4;F7A3Q3;F6UY70;F7CRG8;E9Q8H5;E9Q2G8;F6Z4Q6;E9Q2J6;E9PZ55	Q05512;E9QMP6;A0A0R4J0B1;A0A0R4J227;E9PYX3;E9Q9N6;F6ZS70;Q3T9A3;F7CVZ7	Serine/threonine-protein kinase MARK2	13	11	21.4	19.6	86.305	0	57.344	2260500000	121	0.159666	0.255616		0.486316	0.421432		0.857066	1.02674		0.177685	-0.367837		0.0555919	0.104184		2.49309	1.90475	spe	0.872874	0.914815		1.45228	1.73033	spe	0.378983	-0.517652		0.208957	0.287967
Ddx46	Q569Z5;F8WHR6;A0A2R8VHK2	Q569Z5;F8WHR6	Probable ATP-dependent RNA helicase DDX46	9	9	8.6	8.6	117.45	0	15.446	504630000	70	NaN	0		NaN	0		NaN	0		NaN	0		NaN	0		2.69837	1.19459	spe	2.76463	1.23214	spe	1.07873	-0.633098		0.5574	0.35828		1.67652	0.388018	up0.3
Abhd12	Q99LR1;D6RI21;D6RFU2	Q99LR1;D6RI21;D6RFU2	Monoacylglycerol lipase ABHD12	5	5	9.3	9.3	45.269	0	10.688	343020000	78	NaN	0		NaN	0		NaN	0		NaN	0		NaN	0		1.61711	1.23961	spe	1.65058	1.33935	spe	0.535634	0.513357		0.788493	0.780728		1.95902	0.956123	up0.5
Rhoa	A0A0A6YXF6;Q9QUI0	A0A0A6YXF6;Q9QUI0	Transforming protein RhoA	3	3	20.6	20.6	18.71	0	8.8706	1589900000	88	NaN	0		NaN	0		NaN	0		NaN	0		NaN	0		3.01518	1.21148	spe	2.17592	1.06891	spe	NaN	0		1.39774	0.590292	up0.5	0.808954	0.38664
Slc25a46	A0A3Q4L2U5;Q9CQS4	A0A3Q4L2U5;Q9CQS4	Solute carrier family 25 member 46	3	3	20.5	20.5	26.124	0	8.6148	179340000	18	NaN	0		NaN	0		NaN	0		NaN	0		NaN	0		3.94306	1.85147	spe	1.48554	1.05179	spe	NaN	0		2.83301	1.14036	up1	0.0571618	-0.0670706
haemaglobin alpha 2;Hba	Q91VB8;P01942	Q91VB8;P01942	Hemoglobin subunit alpha	5	5	39.4	39.4	15.112	0	56.841	29584000000	417	0.633201	1.56561		7.95047	-1.57038		3.71389	-1.12291		0.812103	0.267444		1.6721	-0.529571	down0.5	2.15969	2.76019	spe	4.11453	1.18463	spe	1.08945	2.15904		0.474661	0.546986		0.363041	-0.223655
Gstp1	P19157;A0A494BAW2;A0A494B908;P46425;A0A494BAM8	P19157;A0A494BAW2;A0A494B908	Glutathione S-transferase P 1	7	7	41	41	23.609	0	76.64	2709700000	145	NaN	0		0.0812785	0.0658391		0.970192	-1.11915		NaN	0		0.16891	0.176245		1.92149	2.45727	spe	5.13454	2.90683	spe	0.238915	-0.42383		1.07604	1.53729		0.393042	0.482097
Mal2	Q8BI08	Q8BI08	Protein MAL2	2	2	17.7	17.7	19.094	0	6.6318	412810000	57	NaN	0		NaN	0		NaN	0		NaN	0		NaN	0		2.75754	1.25666	spe	2.24886	1.22664	spe	0.0598255	-0.0658271		0.340795	0.30613		0.491485	0.334718
Gpm6a	P35802	P35802	Neuronal membrane glycoprotein M6-a	6	6	15.8	15.8	31.149	0	41.432	1389600000	81	NaN	0		NaN	0		0.0972474	-0.137266		NaN	0		NaN	0		1.85418	2.20534	spe	5.19539	2.93473	spe	1.05327	1.43517		0.0546916	0.115772		0.843147	0.880368
Akr7a2	Q8CG76	Q8CG76	Aflatoxin B1 aldehyde reductase member 2	2	2	8.4	8.4	40.612	0	9.8274	222260000	22	NaN	0		NaN	0		NaN	0		NaN	0		NaN	0		1.94139	1.20379	spe	1.92062	1.39611	spe	NaN	0		0.538998	0.452404		0.194634	0.211984
Tbc1d10b	Q8BHL3;A0A0U1RPN1	Q8BHL3	TBC1 domain family member 10B	19	19	27.4	27.4	87.274	0	170.28	10148000000	344	NaN	0		10.379	3.82951	spe	0.685868	1.64524		1.34891	-2.59414	down1	9.46392	4.43689	up1	2.47853	2.09039	spe	0.500209	0.564853		1.00355	0.289042		4.36536	-2.03211	down1	0.818654	-0.788512
Acta1;Actc1;Actg2;Acta2	P68134;P68033;P63268;P62737;D3YZY0;A0A1D5RM20;D3Z2K3;A0A494B9T3;A0A0U1RQ96	P68134;P68033;P63268;P62737;D3YZY0;A0A1D5RM20;D3Z2K3;A0A494B9T3	Actin, alpha skeletal muscle;Actin, alpha cardiac muscle 1;Actin, gamma-enteric smooth muscle;Actin, aortic smooth muscle	4	4	13.5	13.5	42.051	0	37.456	4790800000	99	0.0397098	0.110458		4.69542	1.61077	spe	0.092886	-0.0986058		0.0473259	0.12674		0.845641	1.1544		1.55846	1.44213	spe	1.28497	1.18844		NaN	0		1.4255	1.30413	up1	0.144975	-0.258846
Sh3glb2	A2AWI7;A2AWI9;Q8R3V5;A0A0G2JEC4;Q9JK48	A2AWI7;A2AWI9;Q8R3V5	Endophilin-B2	9	9	25	25	44.907	0	44.161	1174100000	134	1.62004	-0.939054		0.0363852	-0.0372414		NaN	0		NaN	0		NaN	0		3.21284	1.03936	spe	0.633916	-0.39131		0.361774	-0.287225		1.38292	0.756718	up0.5	1.92431	-0.828245	down0.5
Gpm6b	P35803;A2AEG6;A2AEG3	P35803;A2AEG6	Neuronal membrane glycoprotein M6-b	4	4	13.1	13.1	36.209	0	57.469	2246100000	131	2.39807	-1.64723		6.09743	-2.4957		1.89773	-1.5522		0.0512434	-0.05585		0.0122971	-0.010563		2.09501	1.91364	spe	0.496103	-0.72178		0.123164	-0.228356		1.35522	1.26825	up1	2.88869	-2.06359	down1
Ndufa10	Q99LC3;A0A087WR38	Q99LC3	NADH dehydrogenase [ubiquinone] 1 alpha subcomplex subunit 10, mitochondrial	6	6	20	20	40.603	0	14.353	1052900000	51	NaN	0		NaN	0		NaN	0		NaN	0		NaN	0		3.50883	2.20908	spe	NaN	0		1.19477	-1.148		2.23982	1.40778	up1	3.08542	-1.48217	down1
Lancl1	B2KGR2;O89112	B2KGR2;O89112	LanC-like protein 1	2	2	13.3	13.3	19.656	0	8.975	610090000	37	NaN	0		NaN	0		NaN	0		NaN	0		NaN	0		3.66919	2.35571	spe	0.0706018	0.0899099		NaN	0		3.26406	2.1311	up1	1.89128	-1.64409	down1
Vsnl1	P62761	P62761	Visinin-like protein 1	2	2	11.5	11.5	22.142	0	9.636	225240000	24	NaN	0		NaN	0		NaN	0		NaN	0		NaN	0		4.73751	1.5045	spe	NaN	0		NaN	0		4.81367	1.57738	up1	2.87033	-1.31324	down1
Dbnl	Q62418	Q62418	Drebrin-like protein	9	9	25.9	25.9	48.699	0	34.944	1772800000	88	NaN	0		0.344002	-0.322504		0.550052	-0.445056		NaN	0		NaN	0		1.30194	1.1077	spe	0.210833	0.254604		0.106361	0.220812		0.581027	0.850831		1.29937	-1.12691	down1
Rap1gds1	E9Q6Q4;Q3TU36;E9Q912;A0A0G2JF70;A0A0G2JGC8	E9Q6Q4;Q3TU36;E9Q912;A0A0G2JF70;A0A0G2JGC8		3	3	5.4	5.4	60.792	0	23.193	1544200000	122	0.692624	-0.604135		1.24925	-0.906565		NaN	0		NaN	0		NaN	0		1.49986	1.25317	spe	0.0169782	0.0323928		0.807974	0.900748		0.322622	0.334376		1.9005	-1.37748	down1
Gphn	A0JNY3;Q8BUV3	A0JNY3;Q8BUV3	Gephyrin;Molybdopterin adenylyltransferase;Molybdopterin molybdenumtransferase	6	6	7.8	7.8	83.665	0	50.24	1650300000	164	1.72891	-1.56402		1.00201	-0.97759		0.816438	-0.722426		NaN	0		NaN	0		1.41726	1.27595	spe	0.00390786	0.00733566		3.79357	0.636403		1.4841	-0.389651	down0.3	0.649455	-0.198765
Pqbp1	Q91VJ5;A2AER8;A2AER9	Q91VJ5;A2AER8	Polyglutamine-binding protein 1	4	4	22.4	22.4	30.597	0	11.029	1056800000	44	0.834601	-0.759044		0.587912	0.477145		0.232597	0.215429		1.08853	-0.954958		1.6066	1.19505	up1	2.90734	1.44477	spe	1.17954	0.928634		1.058	0.631863		1.7954	0.859383	up0.5	0.447852	-0.42627
Cct2	P80314;A0A1W2P6Q3;A0A1W2P7B7;A0A1W2P871;A0A1W2P828	P80314;A0A1W2P6Q3;A0A1W2P7B7	T-complex protein 1 subunit beta	6	6	12.7	12.7	57.477	0	15.643	1126300000	122	0.403145	-0.473431		0.0595134	0.0360741		0.415516	-0.274563		0.658964	0.583244		0.388999	-0.328407		4.38774	1.04158	spe	0.384783	0.297056		0.618251	-0.460444		1.46381	0.738396	up0.5	1.04322	-0.472906
Srrm2	Q8BTI8;A0A087WRX8;A0A3B2W3Z4;A0A087WPS9	Q8BTI8;A0A087WRX8;A0A3B2W3Z4	Serine/arginine repetitive matrix protein 2	12	12	6.4	6.4	294.84	0	28.344	935670000	81	NaN	0		NaN	0		NaN	0		NaN	0		NaN	0		1.69491	1.27598	spe	0.0569845	0.0915877		0.464783	0.536976		1.41095	0.857556	up0.5	1.05244	-0.890287
Uchl1	Q9R0P9	Q9R0P9	Ubiquitin carboxyl-terminal hydrolase isozyme L1	8	8	34.1	34.1	24.838	0	46.425	4192300000	180	0.492171	-1.0176		4.91661	-3.10957		1.95156	-2.53075		0.66692	1.24489		0.307894	-0.567131		2.93289	2.03375	spe	0.00630212	-0.0159492		0.526088	-0.898417		1.42877	1.10529	up1	1.06911	-0.891915
Tpm1	G5E8R0;E9Q453;G5E8R1;E9Q455;G5E8R2;E9Q456;E9Q452;Q8BSH3;B7ZNL3;E9Q454;F8WID5;P58771;Q8BP43;E9Q450;E9Q448;S4R261	G5E8R0;E9Q453;G5E8R1;E9Q455;G5E8R2;E9Q456;E9Q452;Q8BSH3;B7ZNL3;E9Q454;F8WID5;P58771;Q8BP43;E9Q450;E9Q448	Tropomyosin alpha-1 chain	7	7	34.7	34.7	28.343	0	33.022	1255700000	100	0.254313	0.252839		2.23438	-1.38698		2.08328	-1.62666		1.57057	1.29175	up1	1.33094	-0.95	down0.5	2.3939	1.62861	spe	0.481454	0.590047		0.198521	0.314965		0.173193	0.254683		0.448662	-0.536903
Ywhab	Q9CQV8;A2A5N1	Q9CQV8;A2A5N1	14-3-3 protein beta/alpha;14-3-3 protein beta/alpha, N-terminally processed	8	8	30.9	30.9	28.086	0	169.7	19327000000	297	0.0780742	0.117154		3.32084	-1.04516		1.71411	-2.35981		1.37087	2.02418	up1	0.430558	-0.311256		1.30898	2.24762	spe	0.015374	0.0577831		0.166094	-0.453406		0.366631	0.620504		0.50885	-0.744565
Prdx2	Q61171;D3Z4A4	Q61171;D3Z4A4	Peroxiredoxin-2	8	8	35.4	35.4	21.778	0	18.153	2242500000	104	0.642169	0.95199		NaN	0		0.450595	0.612404		0.0590411	-0.145319		1.19227	-1.10531		1.30897	2.13515	spe	0.0139344	-0.0311578		0.821127	1.51414		0.0683247	0.193837		1.26432	-1.93391
D10Jhu81e	Q9D172;A0A1W2P7B6	Q9D172;A0A1W2P7B6	ES1 protein homolog, mitochondrial	4	4	19.2	19.2	28.09	0	52.231	1718000000	114	0.446603	-0.28341		0.571244	-0.50101		0.691598	-0.659299		0.471787	0.356031		0.0327362	-0.0253256		1.74471	1.90113	spe	0.492102	-0.854071		0.829085	-1.19028		1.20176	1.1555		0.35865	-0.511726
Atp5d	Q9D3D9	Q9D3D9	ATP synthase subunit delta, mitochondrial	2	2	13.7	13.7	17.6	0	37.598	1817200000	125	1.95014	-1.33938		3.54526	-2.19038		1.56016	-1.59335		NaN	0		NaN	0		1.34954	1.24233	spe	0.15839	0.251304		0.244709	-0.504941		0.505712	0.462174		0.0973867	-0.0747604
Uba1	Q02053;P31254	Q02053	Ubiquitin-like modifier-activating enzyme 1	15	15	17.4	17.4	117.81	0	323.31	4384800000	233	0.0897556	0.179687		0.0620508	0.111103		0.422866	-0.639043		0.129116	-0.288767		0.422571	0.692492		1.3155	1.41152	spe	0.00742148	0.0164626		0.279589	-0.486776		0.749312	0.944314		0.565087	-0.679239
Ablim1	E9Q9Q7;E9Q9D1;E9Q9D2;E9Q030;E9Q9C7;E9Q9C4;E9Q9C0;E9Q9C1;E9Q9C2;E9QK41;Q8K4G5	E9Q9Q7;E9Q9D1;E9Q9D2;E9Q030;E9Q9C7;E9Q9C4;E9Q9C0;E9Q9C1;E9Q9C2;E9QK41;Q8K4G5	Actin-binding LIM protein 1	5	5	16	16	45.883	0	39.164	379020000	50	NaN	0		NaN	0		NaN	0		NaN	0		NaN	0		1.6368	1.17564	spe	1.16496	0.596297		0.281283	0.312803		0.0980144	0.110994		0.00769272	-0.00700061
Acsl6	Q5ICG5;Q8R1X1;Q91WC3;Q8BYJ0;Q8C028;Q5F2C5;B1ARG5;B0QZJ6;E9Q7Y2	Q5ICG5;Q8R1X1;Q91WC3;Q8BYJ0;Q8C028;Q5F2C5	Long-chain-fatty-acid--CoA ligase 6	5	5	8.3	8.3	77.969	0	19.941	237110000	55	NaN	0		NaN	0		NaN	0		NaN	0		NaN	0		1.71664	1.32682	spe	0.0141948	0.0136951		0.302935	0.30668		0.926993	0.7752		0.424549	-0.326166
Hras	Q61411;C0H5X4;B2KGV5;E9Q8V2;E9PVD5;A0A0G2JGM2;A0A0N4SVY1	Q61411	GTPase HRas;GTPase HRas, N-terminally processed	4	2	25.4	11.1	21.298	0	15.101	420690000	50	NaN	0		NaN	0		NaN	0		NaN	0		NaN	0		1.56937	1.00299	spe	0.863	0.589892		0.43333	-0.298053		0.511187	0.328128		0.0846508	-0.0943187
Vamp2;Vamp3;Vamp1	B0QZN5;P63044;P63024;A0A0N4SUV3;D3YTU0;Q62442	B0QZN5;P63044;P63024;A0A0N4SUV3;D3YTU0;Q62442	Vesicle-associated membrane protein 2;Vesicle-associated membrane protein 3;Vesicle-associated membrane protein 1	6	6	50.3	50.3	17.862	0	99.338	3824700000	174	0.304706	-0.611194		3.60237	-2.27646		1.98793	-1.62704		0.117944	0.242321		0.187594	-0.360529		1.32201	1.38871	spe	0.0913489	0.115952		0.460049	0.599083		0.261371	0.402617		0.601366	-0.772744
Map6d1	Q14BB9	Q14BB9	MAP6 domain-containing protein 1	4	4	34	34	20.432	0	53.89	1945800000	102	NaN	0		0.918288	-0.795187		1.4102	-1.35746		NaN	0		NaN	0		1.54463	1.97447	spe	0.104953	0.224577		0.501097	0.945081		0.0257274	-0.0563911		0.304789	-0.468282
Tomm70a	Q9CZW5	Q9CZW5	Mitochondrial import receptor subunit TOM70	10	10	19.5	19.5	67.589	0	38.285	1307500000	118	NaN	0		1.36441	-0.928357		NaN	0		NaN	0		NaN	0		1.84557	1.78915	spe	0.699617	0.826443		0.615843	0.737663		0.293205	-0.353036		0.501269	0.451532
Ogdhl	B2RXT3;E9Q7L0	B2RXT3;E9Q7L0		6	6	7.1	7.1	114.56	0	93.541	1439200000	109	NaN	0		NaN	0		NaN	0		NaN	0		NaN	0		1.42195	1.29631	spe	0.186211	-0.267649		0.619334	0.554706		0.870549	0.694177		0.768586	-0.897976
Madd	A0A0R4J1F4;A2AGR0;A2AGQ6;E9QN47;A2AGQ4;Q80U28;A2AGQ2;A2AGQ7;A2AGQ9;A2AGQ5;A2AGR1;A2AGQ3;A2AGQ8;A6PWP8	A0A0R4J1F4;A2AGR0;A2AGQ6;E9QN47;A2AGQ4;Q80U28;A2AGQ2;A2AGQ7;A2AGQ9;A2AGQ5;A2AGR1;A2AGQ3;A2AGQ8;A6PWP8	MAP kinase-activating death domain protein	6	6	4.9	4.9	173.2	0	24.506	623840000	105	NaN	0		NaN	0		NaN	0		NaN	0		NaN	0		1.31789	0.995311	spe	0.240641	-0.168613		0.840581	-0.26794		0.56812	0.324153		0.164228	-0.112944
Fech	A0A494BAI5;Q544X6;P22315;A0A494B9Y8;Q91W09;A0A494BA61;A0A494BBL4;F6T2S0	A0A494BAI5;Q544X6;P22315;A0A494B9Y8;Q91W09;A0A494BA61;A0A494BBL4;F6T2S0	Ferrochelatase;Ferrochelatase, mitochondrial	4	4	7.4	7.4	46.96	0	6.7831	788750000	101	NaN	0		0.328108	0.198374		0.00052152	0.00078392		NaN	0		NaN	0		2.89461	1.68811	spe	NaN	0		0.840895	0.92911		0.1828	0.264629		0.83987	-0.651898
Brk1	Q91VR8	Q91VR8	Protein BRICK1	4	4	50.7	50.7	8.7608	0	9.6822	1186000000	92	2.07572	-1.02645		3.18025	-1.43519		NaN	0		NaN	0		NaN	0		1.80791	1.33961	spe	0.274686	-0.342969		1.01021	0.923353		0.0273688	-0.0432189		0.338126	-0.450713
Fbxl4	Q8BH70;V9GXH8;V9GWT8;V9GWU9	Q8BH70;V9GXH8;V9GWT8;V9GWU9	F-box/LRR-repeat protein 4	9	9	20.9	20.9	70.268	0	48.131	2210000000	77	0.167726	0.233059		1.12759	0.851446		0.561802	0.583204		0.00399606	0.0080932		0.275216	0.428002		1.47462	1.19779	spe	0.334997	0.39906		1.33462	0.893621		0.187407	-0.250342		0.17344	0.283281
Ywhaq	P68254	P68254	14-3-3 protein theta	8	8	26.9	26.9	27.778	0	122.13	22859000000	305	0.243807	0.440573		4.34762	-0.588408		2.93264	-0.712023		0.440535	0.137733		0.182084	0.0433169		1.49201	1.65445	spe	0.0638086	0.182461		3.74444	0.924655		0.0564224	0.0356137		0.812139	-0.933927
Rps2	P25444;D3YVC1;D3YWJ3	P25444;D3YVC1;D3YWJ3	40S ribosomal protein S2	24	24	57.3	57.3	31.231	0	323.31	568230000000	1416	10.5551	9.24497	spe	20.2117	8.9931	spe	12.2088	9.10212	spe	0.522504	-0.141152		0.264049	0.0669842		2.03163	0.980665		2.20382	2.3431	spe	4.54524	1.50489	spe	1.5305	-0.526253	down0.5	0.123449	0.0628433
G3bp2	P97379;A0A0J9YTQ8;A0A0J9YUY8	P97379	Ras GTPase-activating protein-binding protein 2	13	12	29.5	27	54.087	0	104.05	17168000000	324	6.84205	4.03629	spe	10.8057	3.68813	spe	6.60217	3.85539	spe	0.562941	-0.344398		0.184366	-0.105077		0.236738	0.341747		1.54578	1.99988	spe	5.96925	3.06454	spe	3.10688	-2.65945	down1	1.01569	1.59538
Rps11	P62281;A0A1B0GRR3;A0A1B0GSE8	P62281;A0A1B0GRR3;A0A1B0GSE8	40S ribosomal protein S11	27	27	84.8	84.8	18.431	0	283.95	445720000000	1277	9.60257	4.76344	spe	16.0588	4.92686	spe	8.61954	5.29658	spe	0.0956698	-0.0255089		1.95823	-0.384658	down0.3	1.79043	0.925446		4.45538	1.83708	spe	4.47987	1.77323	spe	1.01075	-0.522065		0.34664	-0.214073
Rpl27a	P14115	P14115	60S ribosomal protein L27a	10	10	61.5	61.5	16.605	0	67.042	300960000000	454	10.2015	8.41908	spe	13.3949	7.93246	spe	4.83655	6.68236	spe	0.551273	0.916197		1.51427	-0.374483	down0.3	1.00614	1.73123		4.03557	4.16847	spe	2.97917	2.69925	spe	0.832555	-1.05269		0.865028	1.02254
Sfpq	Q8VIJ6	Q8VIJ6	Splicing factor, proline- and glutamine-rich	32	30	37.8	36.3	75.441	0	224.98	37182000000	762	10.9176	2.66275	spe	9.63353	2.22856	spe	7.09831	2.87401	spe	1.65409	0.359345	up0.3	6.69094	-0.547676	down0.5	0.615715	0.845767		3.52989	2.70799	spe	1.59594	1.42509	spe	0.24266	-0.348915		0.339548	0.42665
Hnrnpa3	Q8BG05;A2AL12;A2AL13	Q8BG05;A2AL12	Heterogeneous nuclear ribonucleoprotein A3	27	24	56.7	54.1	39.652	0	323.31	218040000000	1113	11.2275	7.57739	spe	14.1843	7.65625	spe	6.90162	6.36779	spe	0.149336	0.0705732		2.04698	0.374702	up0.3	0.06336	0.184317		2.1702	2.2244	spe	1.91337	1.78835	spe	1.02428	-1.6899		0.801291	1.39518
Rbmxl1	Q91VM5;A0A2I3BRL8;A0A2I3BQC0;Q9DAE2	Q91VM5;A0A2I3BRL8	RNA binding motif protein, X-linked-like-1	34	10	61.3	22.7	42.161	0	323.31	68502000000	869	7.09397	4.6281	spe	13.2011	6.14395	spe	9.77083	5.2728	spe	0.508147	-0.167212		2.55822	0.641795	up0.5	0.990541	1.09764		2.78044	1.51955	spe	2.57427	1.38129	spe	0.0891641	-0.118635		0.0763001	0.0966857
Prkcg	P63318;Q2NKI4;A0A0N4SWF4	P63318;Q2NKI4	Protein kinase C gamma type;Protein kinase C	32	30	44.9	39.6	78.357	0	323.31	145980000000	1306	4.1789	1.88888	spe	8.5572	2.09163	spe	2.01211	2.72521	spe	0.0386483	-0.0163533		0.627407	-0.135843		2.05301	0.507114		3.61045	0.936704		3.88949	1.27643	spe	1.44317	-0.381453	down0.3	1.00756	0.273727
Myef2	Q8C854;A2ATP6;A2ATP5;G8JL68;F6XJA1	Q8C854;A2ATP6;A2ATP5;G8JL68;F6XJA1	Myelin expression factor 2	29	29	47	47	63.294	0	323.31	87122000000	1057	6.8705	4.26449	spe	10.9647	4.61585	spe	5.56405	5.04787	spe	0.548606	-0.415435		1.00988	0.448312		0.802179	0.519042		1.49147	0.758871		7.13438	2.0394	spe	1.69232	-0.820719	down0.5	0.226168	-0.212253
Hnrnpa0	Q9CX86	Q9CX86	Heterogeneous nuclear ribonucleoprotein A0	16	16	54.1	54.1	30.53	0	182.58	59892000000	530	7.12732	5.14009	spe	13.8562	5.65472	spe	8.10074	5.60415	spe	1.61799	-0.490207	down0.3	1.22873	0.345429		NaN	0		0.498394	0.521226		1.88902	1.10423	spe	2.63655	-1.18273	down1	0.832693	0.724344
Dgki	D3Z2W1;D3YWQ0;S4R2G0;D3Z519;S4R215	D3Z2W1;D3YWQ0;S4R2G0;D3Z519	Diacylglycerol kinase	18	18	22	22	115.96	0	178.57	13496000000	317	4.74729	3.30324	spe	11.0399	3.32626	spe	6.62384	3.73321	spe	0.0849649	-0.0726322		0.0614498	-0.0403143		0.308501	0.430848		4.45008	-2.23265		2.94929	2.17575	spe	2.62439	-1.52697	down1	1.08277	-0.84693
Rps10	P63325;A0A338P7K4;A0A3B2W864;Q3UW83;A0A338P731	P63325;A0A338P7K4;A0A3B2W864;Q3UW83	40S ribosomal protein S10	18	18	58.2	58.2	18.916	0	138.1	98588000000	548	10.766	6.14942	spe	15.7441	6.8271	spe	8.46653	6.35891	spe	0.917743	-0.163932		0.853683	0.120479		0.245962	0.489055		0.309692	-0.587094		1.53078	1.64594	spe	1.80369	-1.48276	down1	0.0829827	-0.199302
Hnrnpa1	P49312;Q5EBP8;V9GXF8	P49312;Q5EBP8	Heterogeneous nuclear ribonucleoprotein A1;Heterogeneous nuclear ribonucleoprotein A1, N-terminally processed	18	18	60.9	60.9	34.196	0	280.29	44970000000	536	9.66393	4.52871	spe	14.1918	5.40193	spe	6.95324	5.23007	spe	0.0178764	-0.00850042		0.478217	0.138837		1.31732	0.965293		0.848878	1.03244		2.52708	2.28933	spe	1.31136	-1.3385	down1	0.609008	0.820471
Rpl30	P62889;A0A2I3BQF4	P62889;A0A2I3BQF4	60S ribosomal protein L30	13	13	82.6	82.6	12.784	0	300.72	160760000000	576	7.27844	7.12496	spe	15.4412	7.05608	spe	11.5431	7.23177	spe	0.179975	0.0281261		2.36506	-0.445931	down0.3	0.736606	1.68136		1.13363	1.38883		2.01657	2.81314	spe	0.314387	-1.04114		0.0933374	-0.330591
Map2	P20357;G3UZV6;Q80X35;Q80ZL4;Q3TLQ0;G3UWW1;G3UZK9;G3UZE9;F7ALC8;G3UYR3;E9Q8Y2	P20357	Microtubule-associated protein 2	128	101	60	50.1	199.13	0	323.31	756220000000	5846	10.4824	2.89874	spe	16.411	2.57183	spe	8.70732	2.98233	spe	0.512729	0.174486		2.14059	-0.312257	down0.3	1.84652	0.974274		3.97043	0.60509		6.50419	1.11483	spe	0.662896	-0.341501		0.250557	-0.159724
Rpl11	Q9CXW4;A2BH06	Q9CXW4;A2BH06	60S ribosomal protein L11	14	14	59.6	59.6	20.252	0	137.8	303230000000	767	10.1742	8.44577	spe	16.0019	8.10206	spe	10.1763	7.63696	spe	0.184476	0.0839933		3.42823	-0.607386	down0.5	1.15623	1.74359		0.658688	0.164679		3.62683	1.64553	spe	0.00418254	-0.00337728		0.73475	-0.359568
Matr3	Q8K310;A0A494BAZ2;A0A494BAZ7;A0A494BAD4;A0A494B9X1;A0A494BAC5;A0A494BAL7;A0A494B9B1;A0A494BB50;A0A494B968;A0A494B9C9;A0A494B8Y5;A0A494B9Q4	Q8K310;A0A494BAZ2	Matrin-3	32	32	34.9	34.9	94.629	0	271.69	32906000000	803	2.6323	2.31996	spe	6.09194	3.36111	spe	2.87166	2.52464	spe	0.973591	-0.322195		2.13407	0.757652	up0.5	1.00049	0.994297		0.0393643	0.0392332		2.22509	1.0455	spe	0.167829	0.198054		0.611629	-0.520035
FAM120A	Q6A0A9	Q6A0A9	Constitutive coactivator of PPAR-gamma-like protein 1	36	36	42	42	121.64	0	323.31	53756000000	661	7.38698	5.04755	spe	11.9804	5.72127	spe	8.19523	5.48158	spe	0.456066	-0.29964		1.67042	0.696218	up0.5	1.25828	2.08388		0.489352	0.874139		6.81141	2.87809	spe	0.20125	-0.446824		0.379133	-0.939075
Top1	Q04750;Q8R4U6	Q04750	DNA topoisomerase 1	16	16	19.7	19.7	90.875	0	47.411	10051000000	295	5.20564	2.88168	spe	9.53345	3.14641	spe	6.65523	3.69806	spe	1.37191	-0.473183	down0.3	0.102868	0.0415416		0.0374795	0.0449775		NaN	0		3.25337	1.70733	spe	1.19244	-0.911481		0.101263	0.123751
Rps12	Q6ZWZ6;F7AEH4;A0A1W2P7A1;P63323	Q6ZWZ6;F7AEH4;A0A1W2P7A1;P63323	40S ribosomal protein S12	11	11	81.8	81.8	14.515	0	156.06	44016000000	309	7.97526	4.94008	spe	15.0156	5.6273	spe	10.4492	5.46376	spe	0.781668	-0.165862		0.214001	-0.0332518		0.286501	0.377871		0.336521	-0.261002		1.46976	1.26864	spe	0.455085	-0.494331		0.0660454	-0.0719932
Ddx3x;D1Pas1	Q62167;P16381	Q62167;P16381	ATP-dependent RNA helicase DDX3X;Putative ATP-dependent RNA helicase Pl10	25	11	41.4	19.3	73.101	0	223.12	19475000000	555	4.33384	2.89913	spe	9.09012	3.58872	spe	5.57634	3.34948	spe	0.982571	-0.585687		1.02645	0.523458		1.88696	0.692958		1.95095	0.433455		4.27849	1.07952	spe	0.38105	-0.196234		0.399244	-0.193713
Hnrnpd	Q60668	Q60668	Heterogeneous nuclear ribonucleoprotein D0	17	2	43.9	8.7	38.354	0	171.8	54643000000	516	8.78975	5.22137	spe	13.3248	5.58529	spe	7.57681	5.30971	spe	0.0485761	-0.0254602		0.533757	0.171272		0.803138	0.734633		0.140099	-0.263078		2.30261	1.60849	spe	1.0915	-0.930552		0.451681	-0.448961
Rps15	P62843;D3YTQ9	P62843;D3YTQ9	40S ribosomal protein S15	10	10	44.8	44.8	17.04	0	69.451	82520000000	291	10.4275	5.75925	spe	14.888	6.25612	spe	7.47329	6.84409	spe	0.938551	-0.360943		0.110611	-0.0433708		1.19423	1.2946		1.1573	1.22364		1.39356	1.86517	spe	0.154831	-0.376396		0.052167	-0.11478
Rpl35a	O55142	O55142	60S ribosomal protein L35a	13	13	70.9	70.9	12.554	0	72.871	50303000000	437	9.35496	5.24749	spe	12.2462	4.79884	spe	7.70934	5.06914	spe	0.18924	0.0833521		0.384973	-0.176545		0.273706	0.481174		0.522869	0.658969		1.72182	1.86237	spe	0.314728	-0.591619		0.118146	-0.275427
Dgkg	Q91WG7;Q8C413;F2Z409	Q91WG7;Q8C413	Diacylglycerol kinase gamma;Diacylglycerol kinase	12	11	17.5	16.2	88.522	0	36.696	6265000000	130	5.95799	2.26474	spe	6.38231	2.46821	spe	4.09946	2.77857	spe	0.402149	0.310479		0.0373903	0.0313925		0.95632	0.922995		NaN	0		1.90317	1.03919	spe	0.10815	0.135277		0.651436	-0.619741
Psd	Q5DTT2	Q5DTT2	PH and SEC7 domain-containing protein 1	19	19	17.1	17.1	109.69	0	153.32	21416000000	413	5.65369	3.84691	spe	7.97255	3.59746	spe	7.02472	4.23998	spe	0.424588	-0.337972		0.792503	-0.438932		0.817046	1.2562		0.559321	0.639498		2.99321	1.38902	spe	0.776273	-0.9928		0.0653531	0.133056
Rps15a	P62245;F8WJ41;D3Z712;D3YVB4	P62245;F8WJ41;D3Z712;D3YVB4	40S ribosomal protein S15a	16	16	83.1	83.1	14.839	0	258.74	44580000000	365	7.59875	5.1612	spe	14.1117	5.29554	spe	5.55911	4.41193	spe	0.107892	0.119771		0.316205	-0.0942668		0.201392	0.442332		2.47876	2.88097	spe	0.317539	-0.770645		0.0879696	-0.206429		2.6169	2.29755	up1
Hnrnpul2	Q00PI9;A0A494BAL6	Q00PI9	Heterogeneous nuclear ribonucleoprotein U-like protein 2	49	49	51.1	51.1	84.939	0	323.31	123470000000	1202	8.7235	6.57795	spe	16.7181	7.16704	spe	8.1718	6.92806	spe	0.343919	-0.233026		0.189315	0.102512		0.646268	0.82718		1.96383	1.54473	spe	0.581284	-0.700197		2.52834	1.75871	up1	0.295128	0.144576
Numbl	O08919	O08919	Numb-like protein	15	14	21.2	19.9	64.13	0	78.45	27673000000	401	6.73271	4.68998	spe	11.9007	4.20158	spe	6.75326	4.2257	spe	0.485802	0.242106		1.33859	-0.324414	down0.3	0.333823	-0.286068		1.79132	1.8886	spe	0.270784	0.265521		0.35242	-0.408362		0.886064	0.541886
Rps27	A0A0G2JDW7;Q6ZWU9;A0A0G2JG29;A0A0G2JEX7	A0A0G2JDW7;Q6ZWU9;A0A0G2JG29	40S ribosomal protein S27	5	2	42.7	15.9	9.2327	0	31.364	22395000000	210	1.63358	2.05069	spe	6.90632	3.93019	spe	2.05028	2.90437	spe	1.69154	0.588774	up0.5	1.86956	-0.540745	down0.5	0.136193	-0.286138		2.02084	2.5683	spe	0.568021	1.25266		0.0701842	0.170028		0.0513615	-0.137071
Rpl10a	A0A3B2WBL1;Q5XJF6;A0A3B2WDD2;P53026;A0A3B2W824;A0A3B2W820;A0A3B2WCA5;D6RE43	A0A3B2WBL1;Q5XJF6;A0A3B2WDD2;P53026;A0A3B2W824;A0A3B2W820	Ribosomal protein;60S ribosomal protein L10a	18	18	52.3	52.3	24.744	0	199.18	56538000000	402	9.63843	5.75296	spe	11.6695	4.79664	spe	8.73894	5.42791	spe	0.607989	0.100551		2.31828	-0.547148	down0.5	NaN	0		1.77528	1.58013	spe	NaN	0		NaN	0		1.11463	1.05516
Srsf3	P84104	P84104	Serine/arginine-rich splicing factor 3	11	10	49.4	49.4	19.329	0	167.72	37947000000	420	8.20075	2.16741	spe	2.2376	1.48457	spe	3.83482	3.64359	spe	0.615968	0.16496		4.94287	-0.719986	down0.5	1.08411	1.71762		5.16457	3.32876	spe	0.556734	1.13845		0.0475171	-0.109611		0.493777	0.691433
Hist1h4a	P62806	P62806	Histone H4	10	10	58.3	58.3	11.367	0	70.808	34735000000	644	6.34964	4.35735	spe	10.3958	3.73026	spe	6.54982	4.06078	spe	0.844796	-0.28179		0.201296	-0.08777		1.69301	0.719919		5.29785	1.07045	spe	2.35138	0.525133		0.0784037	0.0493336		0.437247	0.214493
Rps20	P60867	P60867	40S ribosomal protein S20	14	14	63.9	63.9	13.373	0	173.81	212580000000	517	9.51055	7.09472	spe	15.9625	7.80769	spe	8.85081	7.83786	spe	0.309569	-0.147446		0.00851162	-0.00427055		1.00773	-2.32871		1.81976	3.09021	spe	0.845232	-2.2574		0.0998142	0.342144		0.655992	1.08784
Erh	A0A1W2P7H9;A0A1W2P7T3;P84089;G3UW85	A0A1W2P7H9;A0A1W2P7T3;P84089;G3UW85	Enhancer of rudimentary homolog	4	4	57.7	57.7	8.2033	0	167.91	29118000000	340	2.26204	1.90791	spe	1.6668	1.35569	spe	1.67661	1.77381	spe	0.409894	-0.237103		0.496949	-0.104143		0.514536	-1.10625		1.67185	3.00366	spe	0.9116	0.597255		0.83863	-1.66257		0.960124	1.807
Cep170	H7BX26;Q6A065;A0A0A6YXK7;A0A0A6YVZ3;A0A0A6YX99	H7BX26;Q6A065;A0A0A6YXK7	Centrosomal protein of 170 kDa	17	17	13.8	13.8	173.94	0	45.239	4871400000	223	3.49393	1.22668	spe	7.51506	1.97293	spe	3.36225	1.8214	spe	0.876606	-0.27199		0.370756	-0.0929262		0.586522	0.560294		3.98375	1.48921	spe	1.12597	1.1376		0.559854	0.486458		0.119509	-0.0651671
Tuba4a	A0A0A0MQA5;P68368;A0A087WQS4;A0A087WRB4;A0A087WSB0;A0A087WSL5;Q3UX10;A0A087WS35	A0A0A0MQA5;P68368	Tubulin alpha-4A chain	35	12	55.6	17	52.793	0	323.31	656430000000	2999	5.7364	1.26745	spe	8.12453	1.11984	spe	1.19262	0.747984		0.103894	0.0402393		0.525837	0.0823662		0.211337	0.273456		4.5874	1.95161	spe	1.18686	-0.372657		0.406385	0.489194		0.70381	0.718174
Mapk1	P63085;A0A338P736;A0A338P781	P63085;A0A338P736	Mitogen-activated protein kinase 1	7	7	18.7	18.7	41.275	0	57.476	20377000000	394	1.33113	1.40636	spe	1.99409	1.23453	spe	0.313463	0.326189		0.206789	0.228865		1.47356	0.339996	up0.3	0.441403	0.764723		1.59312	2.24757	spe	1.20722	0.996093		0.0939696	0.209698		0.076749	0.170619
Tubb5	P99024	P99024	Tubulin beta-5 chain	5	5	11	11	49.67	0	162.58	76835000000	372	2.42184	1.96192	spe	2.05564	1.83104	spe	0.470609	1.63222		0.534801	1.24643		0.883971	0.172249		0.248054	-0.27682		3.74956	1.27908	spe	1.79663	-0.729599		0.333834	0.349665		0.737739	0.663182
Ap2a2	P17427	P17427	AP-2 complex subunit alpha-2	22	15	19.6	14.2	104.02	0	193.6	49758000000	796	2.50994	2.13427	spe	5.16911	1.47148	spe	6.49679	1.46448	spe	0.812177	0.157553		1.72325	-0.326321	down0.3	0.143628	0.0551459		1.56842	-0.757035		0.576399	-0.219498		1.02948	0.340062		1.59433	-0.704948	down0.5
Rbm39	E9Q8F0;Q8VH51;F7AA45;B7ZD61;B7ZD63	E9Q8F0;Q8VH51;F7AA45;B7ZD61	RNA-binding protein 39	12	12	28.2	28.2	47.05	0	175.83	28894000000	433	5.0643	3.93504	spe	13.0961	4.64326	spe	9.23753	5.04258	spe	1.37245	-0.537099	down0.5	0.600116	0.184596		1.58735	0.583295		0.08092	0.0555776		0.564356	-0.221094		1.20119	0.515862		1.92451	-0.675682	down0.5
Dctn1	E9Q586;E9Q3M3;D3YX34;O08788;D3Z2M9;D3YYG9	E9Q586;E9Q3M3;D3YX34;O08788	Dynactin subunit 1	25	25	22.2	22.2	136.85	0	106.27	5819200000	386	1.6567	1.93129	spe	6.97633	1.98889	spe	2.93964	2.4615	spe	0.0615351	-0.144649		0.356142	0.420762		1.76769	-0.667328		7.20692	-1.45039		2.58913	-0.875791		0.86198	0.418207		2.53822	-0.832101	down0.5
Nars	A0A498WGK2;Q8BP47;A0A494BB89;A0A494BAW6;A0A494B927;A0A494BAX5;A0A494B996	A0A498WGK2;Q8BP47;A0A494BB89;A0A494BAW6;A0A494B927;A0A494BAX5	Asparagine--tRNA ligase, cytoplasmic	9	9	15.2	15.2	64.208	0	151.29	10617000000	220	6.12507	2.51101	spe	10.9673	3.17731	spe	4.3153	2.80251	spe	0.391992	0.228774		0.245641	0.0617012		0.963462	-0.466606		1.09283	0.874088		NaN	0		NaN	0		1.48257	1.11323	up1
Ap2a1	P17426;A0A140LIG7;A0A140LHG0;A0A0J9YUA7;A0A140LHA6	P17426	AP-2 complex subunit alpha-1	15	15	13.2	13.2	107.66	0	122.04	17278000000	418	5.68069	3.37794	spe	12.1337	3.01766	spe	4.79254	2.78515	spe	0.153432	0.0479892		3.75376	-0.598073	down0.5	0.383564	0.459802		1.89904	-0.492592		2.81965	0.47225		1.3669	-0.381646	down0.3	0.838504	-0.270826
Rps14	P62264;D3YVF4;D3Z7I1	P62264;D3YVF4;D3Z7I1	40S ribosomal protein S14	12	12	48.3	48.3	16.273	0	323.31	396260000000	991	7.16892	5.81161	spe	11.0085	7.13318	spe	6.30976	6.60968	spe	0.484469	-0.16136		0.468727	0.119939		1.19428	0.38811		2.32359	0.484246		2.56445	0.845106		2.13513	-0.437486	down0.3	0.24763	0.0682227
Map1a	A2ARP8;Q9QYR6	A2ARP8;Q9QYR6	Microtubule-associated protein 1A;MAP1A heavy chain;MAP1 light chain LC2	123	122	38.1	37.8	325.88	0	323.31	309410000000	4980	5.90933	1.05459	spe	12.3197	1.08646	spe	7.46948	1.54033	spe	0.729714	-0.188361		0.544751	0.0901259		4.28901	0.540261		2.97016	0.307274		5.34863	0.869225		3.13469	-0.417214	down0.3	2.09156	0.11382
Brsk1	D3Z5P0;Q5RJI5;G3UXY1;G3UZN4	D3Z5P0;Q5RJI5	Serine/threonine-protein kinase BRSK1	17	16	30.6	29.4	77.196	0	170.8	6588800000	322	4.05753	1.66367	spe	1.88424	1.73089	spe	4.26758	2.23331	spe	1.85145	-0.589766	down0.5	0.00199556	-0.00435066		0.516199	0.234566		0.449686	0.438383		3.2187	0.929208		2.26494	-0.607141	down0.5	0.186184	0.0825981
Ddx5	Q8BTS0;Q61656;S4R1I6;B1ARC0;B1ARB9;S4R1E3	Q8BTS0;Q61656;S4R1I6	Probable ATP-dependent RNA helicase DDX5	42	36	43.6	38.4	69.265	0	206.74	112900000000	1285	9.92132	5.84491	spe	12.9285	6.35092	spe	8.32562	6.16376	spe	0.864447	-0.227436		0.185834	0.0614179		1.37725	0.337603		1.62378	0.594167		2.63579	0.816101		1.40429	-0.543185	down0.5	0.548385	0.240169
Ank3	S4R2K9;G5E8K5;S4R2S8;G5E8K3;G5E8K2;S4R1S2;A0A1W2P812;S4R236;S4R187;S4R165;S4R2J6;S4R2F5;S4R2C1;S4R1X7;G3X971;S4R229;Q3UVY0;A0A087WNU5;W4VSQ0;S4R278;S4R208;S4R1U4;S4R162	S4R2K9;G5E8K5;S4R2S8;G5E8K3;G5E8K2;S4R1S2;A0A1W2P812	Ankyrin-3	30	30	14.3	14.3	284.64	0	110.18	7412900000	440	4.08967	2.37127	spe	5.7395	2.25073	spe	4.91859	3.14158	spe	1.05206	-0.264311		0.336273	0.177479		0.071005	-0.0427675		1.30655	-0.459339		3.00629	0.831251		1.81763	-0.662939	down0.5	0.411296	-0.208304
Ilf2	Q9CXY6	Q9CXY6	Interleukin enhancer-binding factor 2	11	11	33.1	33.1	43.062	0	64.405	49049000000	247	9.21093	5.50447	spe	12.649	5.64323	spe	9.3628	5.64975	spe	0.770368	0.200166		1.44036	-0.240719	down0.2	1.23984	0.945674		0.0892942	-0.0938203		NaN	0		0.189757	0.207744		0.16696	-0.21594
Ddx1	Q91VR5;A0A1Y7VM48	Q91VR5	ATP-dependent RNA helicase DDX1	13	13	23.5	23.5	82.499	0	72.335	7522500000	211	5.76521	2.88382	spe	6.68349	2.08739	spe	5.21302	2.61717	spe	0.531393	0.0844326		2.67773	-0.264184	down0.2	1.31688	-1.47943		0.174252	-0.33434		0.536075	-0.431902		NaN	0		NaN	0
Cdc5l	Q6A068;A0A1W2P7S8;A0A1W2P7Z8;A0A1W2P7H4;A0A1W2P855;A0A1W2P6Q8	Q6A068;A0A1W2P7S8;A0A1W2P7Z8;A0A1W2P7H4;A0A1W2P855;A0A1W2P6Q8	Cell division cycle 5-like protein	31	31	43	43	92.188	0	263.25	17724000000	415	5.78087	3.8936	spe	13.1342	3.79297	spe	7.05101	4.38999	spe	0.272349	-0.0799634		1.45983	-0.277215	down0.2	0.870484	0.52703		NaN	0		0.724286	0.594828		0.0862843	-0.0876214		0.12698	-0.100784
Trim3	Q3TDT0;Q9R1R2;D3Z7V9;D3YY12;D3YZJ0	Q3TDT0;Q9R1R2	Tripartite motif-containing protein 3	22	20	30.1	28.6	78.271	0	173.52	26124000000	450	8.20291	4.91557	spe	12.4633	4.24576	spe	5.65327	4.92941	spe	0.18263	0.149583		2.16738	-0.208952	down0.2	NaN	0		NaN	0		NaN	0		NaN	0		NaN	0
Hnrnpab	Q99020;Q20BD0;Q80XR6	Q99020;Q20BD0;Q80XR6	Heterogeneous nuclear ribonucleoprotein A/B	20	20	50.5	50.5	30.831	0	113.83	27954000000	402	6.11541	4.56455	spe	11.9405	4.49434	spe	9.19016	4.93424	spe	0.908017	0.2333		1.37916	-0.229317	down0.2	NaN	0		NaN	0		NaN	0		NaN	0		NaN	0
Eif2s2	Q99L45;E0CXJ3	Q99L45	Eukaryotic translation initiation factor 2 subunit 2	10	10	28.1	28.1	38.092	0	111.9	5920200000	154	7.76905	1.96082	spe	8.20456	2.12175	spe	3.28193	2.19223	spe	2.06787	0.324965	up0.3	1.79141	-0.312923	down0.3	NaN	0		NaN	0		NaN	0		NaN	0		NaN	0
Fxr1	Q61584;A0A0G2JEP0;A0A0H2UH27;A0A0G2JGL6	Q61584;A0A0G2JEP0;A0A0H2UH27	Fragile X mental retardation syndrome-related protein 1	13	13	24.5	24.5	76.221	0	116.49	7985400000	176	4.77722	2.61181	spe	8.73433	2.61251	spe	3.18919	2.73508	spe	0.396942	-0.137772		1.49852	-0.308212	down0.3	NaN	0		NaN	0		NaN	0		NaN	0		NaN	0
Thsd7a	E9PWD2;E9QNR5;Q69ZU6	E9PWD2;E9QNR5;Q69ZU6	Thrombospondin type-1 domain-containing protein 7A	35	35	27.6	27.6	183.63	0	175.12	22463000000	498	6.91346	4.56402	spe	13.3225	4.20996	spe	6.3657	4.57958	spe	0.474255	-0.121549		2.33192	-0.36843	down0.3	NaN	0		NaN	0		NaN	0		NaN	0		NaN	0
Rpl23	P62830;A2A6F8	P62830	60S ribosomal protein L23	11	11	53.6	53.6	14.865	0	127.27	30169000000	290	5.50341	4.61343	spe	8.7216	4.18589	spe	7.57985	5.114	spe	1.09119	-0.110477		2.89276	-0.382629	down0.3	0.705984	1.06654		NaN	0		NaN	0		0.316066	0.56948		0.255735	-0.449955
Kif2a	E0CZ72;P28740;F8VQ42;Q3TTL2;Q922S8;Q8C0N1;F6RLL5	E0CZ72;P28740;F8VQ42	Kinesin-like protein;Kinesin-like protein KIF2A	26	26	37.8	37.8	83.86	0	312.64	31361000000	666	7.63536	4.25637	spe	10.7242	4.17298	spe	6.61159	4.48087	spe	1.0044	0.320092		2.30834	-0.445585	down0.3	0.186678	-0.0932074		0.0694046	0.135024		0.0785126	-0.123088		0.20603	0.266977		0.563059	-0.617093
Rpsa	P14206;A0A1L1SRW0;A0A1L1SUK3	P14206;A0A1L1SRW0	40S ribosomal protein SA	5	5	27.5	27.5	32.838	0	121.46	8755900000	138	5.96049	2.78975	spe	12.7463	2.80989	spe	4.0876	2.86298	spe	0.477356	0.292177		2.39141	-0.431278	down0.3	0.602538	0.557288		0.353224	-0.355387		0.157603	0.238164		NaN	0		NaN	0
Srsf7	A0A3Q4L393;Q8BL97;A0A3Q4EH04;A0A3Q4L335;A0A3Q4EGP0	A0A3Q4L393;Q8BL97;A0A3Q4EH04;A0A3Q4L335;A0A3Q4EGP0	Serine/arginine-rich splicing factor 7	7	7	34.5	34.5	26.939	0	17.441	5908300000	153	4.13628	2.47108	spe	6.77528	2.02164	spe	2.36601	1.82133	spe	0.89657	0.545282		1.75615	-0.368869	down0.3	NaN	0		NaN	0		NaN	0		NaN	0		NaN	0
Nop56	Q9D6Z1;A2APD7;F7CHQ7;F6U250;F6V095;E0CXZ0;F6USW7;F7CHP9	Q9D6Z1;A2APD7	Nucleolar protein 56	20	20	38.1	38.1	64.464	0	219.34	18868000000	342	9.02481	4.0013	spe	9.28937	3.49446	spe	6.74549	4.26814	spe	0.460218	0.281859		1.90596	-0.416621	down0.3	NaN	0		NaN	0		NaN	0		NaN	0		NaN	0
Ap2b1	Q9DBG3;H3BIY9;H3BKM0;H3BJ06;Q5SWR0	Q9DBG3;H3BIY9;H3BKM0	AP-2 complex subunit beta;AP complex subunit beta	19	10	17.4	10.2	104.58	0	187.97	39748000000	634	9.21351	4.78867	spe	3.16537	3.26895	spe	4.00528	1.86691	spe	2.98761	0.265266	up0.2	4.54681	-0.564505	down0.5	0.270193	-0.154987		0.851605	-1.07054		1.1754	0.24774		0.49812	-0.236715		0.557583	-0.792979
Rpl12	P35979	P35979	60S ribosomal protein L12	11	11	69.1	69.1	17.804	0	323.31	77118000000	412	8.43061	6.4414	spe	14.646	5.49823	spe	8.12025	6.72812	spe	0.0202896	0.0127344		2.25199	-0.607337	down0.5	0.948115	0.790088		0.521928	0.650132		1.28894	1.22764		0.087976	-0.149878		0.107983	-0.193715
Farsa	Q8C0C7;E9PWY9;D6RIJ2	Q8C0C7;E9PWY9	Phenylalanine--tRNA ligase alpha subunit	14	14	42.3	42.3	57.598	0	62.282	7418500000	313	3.22357	2.48002	spe	3.41567	1.40867	spe	5.62361	2.13207	spe	1.07615	0.684566		1.55016	-0.914669	down0.5	4.97656	-1.10024		2.3631	-1.1803		2.26659	-1.4871		0.883103	0.668105		0.255691	-0.184825
Rps26	P62855	P62855	40S ribosomal protein S26	6	6	44.3	44.3	13.015	0	34.331	95773000000	224	10.1297	6.26498	spe	7.39599	5.39474	spe	8.01719	5.88043	spe	1.08383	0.596885		1.5798	-0.705781	down0.5	0.0838135	0.322374		0.527592	-1.14317		1.00109	2.13771		0.302705	-1.12993		0.0401959	-0.149555
Trim2	Q9ESN6;Q3UHH4;E9QKC6;D3YTN5;D3YY69	Q9ESN6;Q3UHH4;E9QKC6	Tripartite motif-containing protein 2	11	11	19.1	19.1	81.444	0	34.389	4568500000	99	5.92787	2.22652	spe	6.81555	1.83285	spe	2.97579	2.00559	spe	1.03134	0.691382		1.5681	-0.522411	down0.5	NaN	0		NaN	0		NaN	0		NaN	0		NaN	0
Srsf5	Q9D8S5;O35326	Q9D8S5;O35326	Serine/arginine-rich splicing factor 5	9	9	26.7	26.7	30.978	0	158.81	16846000000	250	5.23664	4.27947	spe	9.83383	2.88292	spe	8.58753	4.37769	spe	0.271968	0.0947113		4.18961	-0.709654	down0.5	NaN	0		NaN	0		0.314512	0.390597		0.108288	-0.150461		NaN	0
Npm1	Q61937;Q9DAY9;Q5SQB0;Q5SQB5	Q61937;Q9DAY9;Q5SQB0;Q5SQB5	Nucleophosmin	19	19	50	50	32.56	0	273.02	33556000000	413	6.71552	4.4362	spe	10.9173	4.16418	spe	7.39179	4.74779	spe	0.0545232	-0.0275936		2.67492	-0.577618	down0.5	NaN	0		NaN	0		0.792333	1.0283		0.354086	-0.460497		NaN	0
Rtcb	Q99LF4	Q99LF4	tRNA-splicing ligase RtcB homolog	14	14	34.7	34.7	55.249	0	136.9	20707000000	437	5.19651	4.06993	spe	6.79414	3.61463	spe	5.55065	4.32888	spe	0.736586	0.578625		4.62175	-0.621562	down0.5	0.744939	-0.991748		0.345814	-0.682394		1.99511	-1.70367		0.145708	0.243474		0.343976	-0.575837
Akap5	H3BIV5;D3YVF0	H3BIV5;D3YVF0	A-kinase anchor protein 5	17	17	39.6	39.6	80.202	0	293.9	22683000000	520	6.42076	3.96964	spe	7.00265	3.33633	spe	4.87185	3.59354	spe	0.285607	0.119851		2.95943	-0.510924	down0.5	0.851269	0.898404		0.0940398	0.0723184		3.15879	0.869431		0.0341965	0.0497561		0.145425	-0.201198
Yars	A2A7S7;Q91WQ3	A2A7S7;Q91WQ3	Tyrosine--tRNA ligase;Tyrosine--tRNA ligase, cytoplasmic;Tyrosine--tRNA ligase, cytoplasmic, N-terminally processed	20	20	35.5	35.5	63.001	0	165.43	11803000000	190	4.78587	3.29415	spe	10.0789	3.21089	spe	2.44336	2.32616	spe	0.693633	0.734253		3.258	-0.60613	down0.5	NaN	0		NaN	0		NaN	0		NaN	0		NaN	0
Zfp37	A0A1Y7VJF3;Q6P3Z4;A0A1Y7VLM5;P17141;A0A1Y7VJ69;E9PWP1;Q3UF22;A0A1B0GR71;Q80W31	A0A1Y7VJF3;Q6P3Z4;A0A1Y7VLM5;P17141;A0A1Y7VJ69	Zinc finger protein 37	16	13	31.5	26	62.62	0	38.125	3014700000	122	4.56513	1.70062	spe	2.39872	1.19539	spe	3.53366	1.47255	spe	0.179015	0.0614443		1.33106	-0.872462	down0.5	NaN	0		NaN	0		NaN	0		NaN	0		NaN	0
Hist1h1a	P43275	P43275	Histone H1.1	9	9	38.5	38.5	21.785	0	133.26	15393000000	217	5.97197	3.31973	spe	10.6382	3.1749	spe	6.38518	4.09613	spe	0.0469934	0.0237999		2.26742	-0.537251	down0.5	NaN	0		NaN	0		NaN	0		NaN	0		NaN	0
Mdk	P12025	P12025	Midkine	7	7	52.1	52.1	15.434	0	125.95	10143000000	158	4.27382	3.58405	spe	2.51355	1.32333	spe	1.89988	2.51057	spe	1.49789	0.679677	up0.5	5.32472	-2.83104	down1	NaN	0		NaN	0		NaN	0		NaN	0		NaN	0
Srsf1	Q6PDM2;H7BX95;F7AI47	Q6PDM2;H7BX95	Serine/arginine-rich splicing factor 1	10	10	48.4	48.4	27.744	0	36.809	6431600000	247	3.257	2.56365	spe	1.60925	1.02584	spe	2.22845	1.68353	spe	1.56089	1.042	up1	2.62896	-1.01868	down1	0.342935	0.360032		0.0725298	-0.144293		0.538368	0.467085		0.202231	-0.305555		1.0031	-1.2204
Mrpl18	Q9CQL5	Q9CQL5	39S ribosomal protein L18, mitochondrial	4	4	20	20	20.677	0	11.42	7281800000	98	6.64657	2.49589	spe	6.85339	2.94432	spe	3.32305	2.3539	spe	0.650112	0.483946		1.3702	0.258113	up0.2	NaN	0		NaN	0		NaN	0		NaN	0		NaN	0
Serbp1	Q9CY58	Q9CY58	Plasminogen activator inhibitor 1 RNA-binding protein	25	3	54.5	3.7	44.714	0	323.31	146730000000	1214	8.32047	4.7661	spe	17.037	5.26511	spe	9.21903	5.30184	spe	0.947336	-0.300681		1.37297	0.279424	up0.2	0.430066	0.296956		1.52203	0.586479		1.79314	0.609728		0.0221006	0.0170482		0.128502	0.0903047
Dhx36	Q8VHK9	Q8VHK9	ATP-dependent RNA helicase DHX36	11	10	9.5	8.6	113.88	0	87.724	5809700000	103	4.86087	2.67596	spe	8.56197	2.64554	spe	5.09808	2.71414	spe	0.230641	0.0476383		1.55501	0.222714	up0.2	NaN	0		NaN	0		NaN	0		NaN	0		NaN	0
Larp1	Z4YJT3;Q6ZQ58	Z4YJT3;Q6ZQ58	La-related protein 1	28	28	39.5	39.5	121.15	0	225.31	28997000000	496	6.05321	4.72604	spe	10.8974	5.25096	spe	9.61707	4.78502	spe	0.496115	-0.166795		1.39201	0.266211	up0.2	NaN	0		NaN	0		NaN	0		NaN	0		NaN	0
Zfr	O88532;F6V459;D3Z5G4;F6QJP7	O88532	Zinc finger RNA-binding protein	46	46	43.8	43.8	116.86	0	323.31	104030000000	1176	9.25613	6.73069	spe	16.141	6.91008	spe	9.97002	6.56925	spe	0.110148	0.0341845		2.28172	0.380985	up0.3	1.2873	1.22963		NaN	0		0.893192	0.768187		0.220574	0.352582		0.509035	-0.590597
Gadd45gip1	Q9CR59	Q9CR59	Growth arrest and DNA damage-inducible proteins-interacting protein 1	10	10	30.6	30.6	25.82	0	38.408	15645000000	184	6.61851	3.39659	spe	10.7465	3.89518	spe	6.87227	3.43044	spe	1.29845	-0.13881		1.90258	0.490124	up0.3	NaN	0		NaN	0		NaN	0		NaN	0		NaN	0
Habp4	Q9JKS5;E9QKB2;A0A1Y7VNT1	Q9JKS5;E9QKB2;A0A1Y7VNT1	Intracellular hyaluronan-binding protein 4	21	21	53.5	53.5	45.924	0	98.022	22452000000	436	6.07539	3.59231	spe	17.206	4.51614	spe	7.42909	4.60725	spe	0.64687	-0.264424		1.53393	0.338196	up0.3	0.317146	0.511731		3.15255	0.889619		NaN	0		0.149465	-0.251478		0.538062	0.713793
Ict1	Q8R035;A2A6T4;D6RHR8	Q8R035;A2A6T4	Peptidyl-tRNA hydrolase ICT1, mitochondrial	10	10	49.5	49.5	23.477	0	34.698	6550200000	149	2.63226	1.59947	spe	6.29158	2.16833	spe	3.54874	2.17364	spe	0.69206	0.296015		1.97341	0.4646	up0.3	NaN	0		NaN	0		NaN	0		NaN	0		NaN	0
Mrpl22	Q8BU88	Q8BU88	39S ribosomal protein L22, mitochondrial	11	11	40.3	40.3	23.805	0	40.655	11909000000	192	3.68759	2.36763	spe	10.8825	2.89996	spe	5.24609	2.7697	spe	0.885422	-0.130354		1.55082	0.370853	up0.3	NaN	0		NaN	0		NaN	0		NaN	0		NaN	0
Hnrnpc	Q9Z204;A0A2I3BRM6;A0A2I3BQH3;A0A2I3BQW7	Q9Z204	Heterogeneous nuclear ribonucleoproteins C1/C2	17	17	45.7	45.7	34.384	0	175.49	63890000000	432	6.65495	3.89986	spe	9.02439	4.59802	spe	9.09897	4.32619	spe	0.316573	0.105848		1.58297	0.529577	up0.5	0.392882	-0.83783		0.860023	-1.37147		0.102608	-0.341226		0.0305634	0.109053		0.330113	0.861768
Mrpl23	O35972;A0A1B0GQZ1;A0A1B0GSZ9	O35972;A0A1B0GQZ1;A0A1B0GSZ9	39S ribosomal protein L23, mitochondrial	3	3	29.5	29.5	17.121	0	156.03	4384500000	84	2.20487	1.22065	spe	8.02916	2.45022	spe	2.7683	1.87453	spe	0.124342	0.137939		2.07408	0.888285	up0.5	NaN	0		NaN	0		NaN	0		NaN	0		NaN	0
Mrpl47	Q8K2Y7	Q8K2Y7	39S ribosomal protein L47, mitochondrial	12	12	40.1	40.1	29.725	0	59.591	12001000000	182	5.23412	2.79915	spe	8.30141	3.36476	spe	3.25709	2.70907	spe	0.129858	0.134468		1.50598	0.628269	up0.5	NaN	0		NaN	0		NaN	0		NaN	0		NaN	0
Mrps15	Q9DC71	Q9DC71	28S ribosomal protein S15, mitochondrial	10	10	37.6	37.6	29.463	0	42.624	4314500000	133	3.05452	1.57618	spe	4.21225	1.97218	spe	1.85228	1.18176	spe	1.78675	0.593102	up0.5	0.107295	-0.0575112		NaN	0		NaN	0		NaN	0		NaN	0		NaN	0
Rps21	Q9CQR2	Q9CQR2	40S ribosomal protein S21	9	9	77.1	77.1	9.1413	0	216.19	22233000000	398	4.41293	3.72518	spe	5.54359	3.28378	spe	3.96733	2.92284	spe	2.70628	0.509127	up0.5	0.116107	0.0430928		0.403175	-0.742918		2.42481	0.917086		1.73246	-0.792684		0.265225	-0.523361		0.721011	1.14871
Agl	A0A0G2JGI9;F8VPN4;F6XXE6;F7CSZ6;E0CYU6	A0A0G2JGI9;F8VPN4;F6XXE6		10	10	9.9	9.9	145.13	0	40.427	3938300000	108	2.85947	1.46431	spe	5.53206	1.68845	spe	3.00979	1.48338	spe	1.88899	0.877156	up0.5	0.616372	-0.110894		NaN	0		NaN	0		NaN	0		NaN	0		NaN	0
Hnrnpm	Q9D0E1;B8JK33;B8JK32;F6W322;A0A3Q4EH91;F7C9U3;A0A3Q4L2X3;G3X924;Q91VC4	Q9D0E1;B8JK33;B8JK32	Heterogeneous nuclear ribonucleoprotein M	45	45	61.6	61.6	77.648	0	323.31	194040000000	1940	4.82965	4.34062	spe	14.3827	4.09403	spe	4.91687	5.13024	spe	1.19231	-0.535774		0.710727	0.297751		1.03936	0.666055		1.30217	0.345462		3.65025	0.737261		0.156805	0.145403		0.241385	-0.211937
Hnrnpf	Q9Z2X1;J3QM80;J3QMT0;J3QNH2;J3QMV8;J3QP45	Q9Z2X1;J3QM80;J3QMT0	Heterogeneous nuclear ribonucleoprotein F;Heterogeneous nuclear ribonucleoprotein F, N-terminally processed	7	7	19.5	19.5	45.729	0	19.372	4095300000	95	6.00163	1.86016	spe	6.77212	2.02098	spe	4.50867	2.19275	spe	0.436838	-0.139808		0.593234	-0.170424		NaN	0		NaN	0		NaN	0		NaN	0		NaN	0
Syngap1	A0A2R8VHH2;J3QQ18;F6SEU4;A0A0A6YVS6;A0A0J9YVH8;A0A0J9YUM2;A0A2R8VH83;A0A140T8K9;A0A338P799;A0A0J9YUZ2;A0A0J9YUZ5;A0A0J9YV63;A0A0J9YUY7	A0A2R8VHH2;J3QQ18;F6SEU4;A0A0A6YVS6;A0A0J9YVH8;A0A0J9YUM2;A0A2R8VH83;A0A140T8K9;A0A338P799	Ras/Rap GTPase-activating protein SynGAP	43	41	39.7	38.2	144.57	0	323.31	23039000000	739	5.58688	3.57139	spe	9.50475	3.29362	spe	3.87367	3.162	spe	1.09629	-0.27485		0.41534	0.222635		0.462756	0.401762		0.743785	-0.296743		3.17038	0.432569		0.0137431	0.0124296		0.954257	-0.552455
Caprin1	Q60865;A2BH47;F6YP03	Q60865	Caprin-1	11	11	16.8	16.8	78.168	0	257.72	15417000000	250	6.14749	4.08942	spe	12.2833	4.06548	spe	5.08747	3.58418	spe	0.162525	-0.0578229		0.416254	-0.116784		NaN	0		NaN	0		NaN	0		NaN	0		NaN	0
Larp7;Gm12666	Q05CL8;A2AMD0	Q05CL8;A2AMD0	La-related protein 7	19	19	37	37	64.802	0	82.559	14148000000	260	6.05782	3.60755	spe	14.728	4.05812	spe	7.24752	3.99983	spe	0.408785	0.10687		0.567924	0.107039		NaN	0		NaN	0		NaN	0		NaN	0		NaN	0
Mrps27	Q8BK72;A0A338P7I7	Q8BK72	28S ribosomal protein S27, mitochondrial	10	10	23.9	23.9	47.778	0	43.809	5663400000	148	7.26472	2.52784	spe	5.30967	1.97407	spe	4.77683	1.97058	spe	1.19631	0.324027		0.869766	-0.171914		NaN	0		NaN	0		NaN	0		NaN	0		NaN	0
Mrps5	Q99N87;B2FDG7	Q99N87	28S ribosomal protein S5, mitochondrial	12	12	28.5	28.5	48.206	0	31.428	9398900000	183	4.6805	2.87744	spe	7.85477	3.05656	spe	4.91926	2.71533	spe	0.341961	0.119712		1.23233	0.225377		NaN	0		NaN	0		NaN	0		NaN	0		NaN	0
Ctcf	Q61164;A2APF3	Q61164	Transcriptional repressor CTCF	19	19	31	31	83.745	0	53.865	11791000000	272	3.8014	3.25563	spe	12.4113	3.55984	spe	5.45439	3.39481	spe	0.457196	0.0844863		0.247067	0.0621505		NaN	0		NaN	0		NaN	0		NaN	0		NaN	0
Mrps34	Q9JIK9	Q9JIK9	28S ribosomal protein S34, mitochondrial	12	12	58.7	58.7	25.826	0	90.564	18743000000	287	5.57334	3.44353	spe	12.0909	4.29429	spe	6.27758	3.81612	spe	0.63004	0.255614		0.79446	0.16992		NaN	0		NaN	0		NaN	0		NaN	0		NaN	0
Mrpl2	Q9D773;B1B1D8;B1B1D7	Q9D773;B1B1D8	39S ribosomal protein L2, mitochondrial	16	16	57.5	57.5	33.34	0	186.66	23285000000	345	6.20765	3.64416	spe	11.2715	4.55613	spe	6.35711	4.12318	spe	0.961088	-0.160396		1.15337	0.483942		NaN	0		NaN	0		NaN	0		NaN	0		NaN	0
Mrps30	Q9D0G0	Q9D0G0	28S ribosomal protein S30, mitochondrial	19	19	42.5	42.5	49.939	0	174.44	33677000000	373	8.18202	4.94266	spe	14.8376	5.21733	spe	7.75046	4.50672	spe	1.10207	0.249056		1.16032	0.204053		NaN	0		NaN	0		NaN	0		NaN	0		NaN	0
Csrp1	P97315	P97315	Cysteine and glycine-rich protein 1	9	9	64.8	64.8	20.583	0	129.91	17517000000	251	2.28405	2.16696	spe	4.86705	3.17033	spe	1.74	2.31128	spe	1.12316	0.406338		0.0205608	-0.00834041		NaN	0		NaN	0		NaN	0		NaN	0		NaN	0
Mrpl28	Q9D1B9;A0A494BBN2;F6U4U1;A0A494BB47	Q9D1B9;A0A494BBN2;F6U4U1;A0A494BB47	39S ribosomal protein L28, mitochondrial	14	14	40.9	40.9	30.169	0	43.127	9801400000	204	7.57519	2.89421	spe	8.32045	3.34839	spe	3.56427	2.18452	spe	0.439082	0.311538		1.1497	0.409666		NaN	0		NaN	0		NaN	0		NaN	0		NaN	0
Mrpl38	Q8K2M0	Q8K2M0	39S ribosomal protein L38, mitochondrial	13	13	23.4	23.4	45.029	0	26.736	4851200000	147	3.50612	1.94709	spe	2.17038	1.57168	spe	3.97025	1.97091	spe	0.370382	0.199976		0.235269	-0.323046		NaN	0		NaN	0		NaN	0		NaN	0		NaN	0
Mrps26	Q80ZS3	Q80ZS3	28S ribosomal protein S26, mitochondrial	11	11	52	52	23.443	0	121.43	12108000000	220	7.05035	3.14378	spe	10.8447	3.42653	spe	5.55715	3.21783	spe	0.81924	0.335778		0.631582	0.120482		NaN	0		NaN	0		NaN	0		NaN	0		NaN	0
Mrpl24	Q9CQ06;A0A0A6YXP0	Q9CQ06	39S ribosomal protein L24, mitochondrial	14	14	58.3	58.3	24.944	0	83.782	24331000000	301	6.35983	4.12363	spe	11.6173	4.62449	spe	3.54542	3.75085	spe	0.491353	0.586441		1.09642	0.50853		NaN	0		NaN	0		NaN	0		NaN	0		NaN	0
Rpf2	Q9JJ80;S4R1Y5;G3X926;S4R2H5;S4R2R2	Q9JJ80;S4R1Y5;G3X926;S4R2H5	Ribosome production factor 2 homolog	6	6	22.9	22.9	35.363	0	31.654	4583400000	120	2.07943	1.31694	spe	8.10467	1.54753	spe	5.10814	2.5246	spe	1.06643	-0.358662		0.616286	0.172256		NaN	0		NaN	0		NaN	0		NaN	0		NaN	0
Zfr2	E9Q5M4;F6VRB4	E9Q5M4		27	27	36.5	36.5	94.974	0	246.54	16686000000	401	5.76565	4.00592	spe	9.77955	3.78372	spe	6.79732	4.58122	spe	1.24663	-0.348635		0.69063	0.141679		NaN	0		NaN	0		NaN	0		NaN	0		NaN	0
Prpf19	Q99KP6	Q99KP6	Pre-mRNA-processing factor 19	13	13	33.7	33.7	55.238	0	155.36	9424000000	143	6.62328	3.05699	spe	9.36017	3.28777	spe	7.11103	3.3077	spe	1.10644	0.32374		1.28983	-0.214255		NaN	0		NaN	0		NaN	0		NaN	0		NaN	0
Agap2	Q3UHD9;A0A5F8MPB7	Q3UHD9;A0A5F8MPB7	Arf-GAP with GTPase, ANK repeat and PH domain-containing protein 2	33	32	31.1	30.4	124.51	0	211.49	14741000000	505	6.87685	3.05633	spe	10.0284	3.53998	spe	2.70126	2.82043	spe	0.268581	0.418918		0.542575	0.207722		0.0755677	-0.0519489		0.37612	0.146148		2.21702	0.421527		1.24071	-0.510802		0.151077	0.102208
Rps3	P62908;D3YV43;A0A140LI77	P62908;D3YV43;A0A140LI77	40S ribosomal protein S3	37	37	89.3	89.3	26.674	0	323.31	457870000000	1369	10.6134	9.01718	spe	19.5614	8.89538	spe	10.5648	9.28056	spe	0.0947733	0.0345542		0.309604	-0.0763551		1.52685	0.318031		0.0388022	-0.0321398		0.317086	-0.207348		1.12441	0.461779		0.546059	-0.314079
Dhx9	A0A087WPL5;E9QNN1;O70133;Q3UR42;A0A0R4J2C3;A0A087WRT3	A0A087WPL5;E9QNN1;O70133;Q3UR42	ATP-dependent RNA helicase A	41	41	30.2	30.2	149.62	0	235.12	36606000000	551	8.61546	4.01962	spe	10.9879	4.44509	spe	5.72102	3.93233	spe	0.0274268	0.0179574		0.852574	0.304453		0.979257	1.17766		0.367566	0.215953		0.000755314	0.00137774		0.570505	0.927289		0.693387	-0.897718
Myo5a	D3YZ62;D3Z4J3;Q99104;F6TDE5;B8JK05;F6Z2S4;G5E8G6;G3X9Y9;P21271;E9Q1F5;D6RFU0;A0A1L1SUF0;F6SV01;D3Z135;F7DF36	D3YZ62;D3Z4J3;Q99104	Unconventional myosin-Va	69	68	35.5	35.1	212.33	0	323.31	37981000000	1470	4.07764	2.5469	spe	6.74281	2.62641	spe	3.74379	1.89528	spe	0.152965	0.0864588		1.10222	0.48986		0.470414	-0.238957		1.44855	-0.529194		0.0493025	-0.041887		0.00455199	0.00429916		0.720118	-0.33564
Cirbp	P60824;K4DI65;D3YU80	P60824;K4DI65	Cold-inducible RNA-binding protein	9	9	58.1	58.1	18.607	0	32.507	6668900000	174	4.69076	2.5081	spe	8.27347	2.36956	spe	4.11039	2.19158	spe	0.603232	-0.149219		0.983825	-0.162829		0.878049	1.282		0.397655	0.501185		0.0875609	-0.172322		0.404858	0.681183		0.552752	-0.791702
Ddx17	Q501J6;Q3U741;Q3TU25	Q501J6;Q3U741;Q3TU25	Probable ATP-dependent RNA helicase DDX17	16	16	27.7	27.7	72.399	0	241.54	20905000000	374	5.69847	3.45208	spe	11.8942	4.1367	spe	6.9685	3.75164	spe	0.122767	0.0823081		0.15475	0.0692225		0.0977342	0.182871		0.897632	1.05914		0.100911	-0.198181		0.138618	0.303964		0.0182066	0.0352033
Hnrnpdl	D3YTQ3;F6VQH5;F6ZKM7;Q9D3U4	D3YTQ3;F6VQH5		15	5	38.3	16.4	46.27	0	156.68	21693000000	284	6.38221	3.6685	spe	11.6864	4.00283	spe	7.43278	4.41377	spe	0.186667	0.0584672		1.13247	0.268934		NaN	0		NaN	0		0.12713	0.155121		NaN	0		NaN	0
Snd1	Q78PY7;Q3TJ56;E9Q3E9	Q78PY7;Q3TJ56	Staphylococcal nuclease domain-containing protein 1	14	14	18.6	18.6	102.09	0	95.631	6345100000	176	6.61035	2.61447	spe	9.09837	2.76313	spe	5.22275	2.40101	spe	0.744989	0.288379		0.786248	-0.234693		NaN	0		NaN	0		0.150593	0.216288		NaN	0		NaN	0
Chtop	E9PW20;Q9CY57;D3YZA1;D3Z7T7	E9PW20;Q9CY57;D3YZA1;D3Z7T7	Chromatin target of PRMT1 protein	8	8	40.9	40.9	22.106	0	177.09	47367000000	449	3.65916	2.29998	spe	4.11819	2.38234	spe	3.807	2.29108	spe	0.178979	0.0663233		1.00429	-0.210014		0.0590463	-0.0564814		0.148949	0.34685		0.169352	0.101168		0.145351	-0.125293		0.192436	-0.161522
Rps5	Q91V55;P97461;D3YYM6;D3Z1S8	Q91V55;P97461;D3YYM6;D3Z1S8	40S ribosomal protein S5;40S ribosomal protein S5, N-terminally processed	16	16	58.3	58.3	22.876	0	323.31	205340000000	811	10.5169	7.59532	spe	17.0578	8.03844	spe	8.5612	8.18777	spe	0.437684	0.120907		0.0892161	-0.0328652		1.13039	0.82012		1.25598	1.48861		0.256587	0.347244		0.449055	0.594336		0.156983	-0.210271
Syncrip	Q7TMK9;G3V018	Q7TMK9;G3V018	Heterogeneous nuclear ribonucleoprotein Q	31	5	44.5	4.7	69.632	0	323.31	89219000000	804	10.0569	6.80415	spe	14.5876	6.20258	spe	7.62885	5.76023	spe	0.488386	0.239022		1.56639	0.152639		0.335571	0.294051		0.0395932	-0.0376352		0.421578	0.326974		0.234711	-0.241265		0.221897	0.210398
Rps27a	P62983;A0A0A6YW67;E9Q9J0;E9Q4P0;E9Q5F6;Q5SX22;P0CG49;P0CG50	P62983	Ubiquitin-40S ribosomal protein S27a;Ubiquitin;40S ribosomal protein S27a	16	11	72.4	41	17.951	0	323.31	402460000000	858	6.31738	7.23271	spe	9.38602	7.16967	spe	4.89822	6.71242	spe	0.486624	-0.268914		0.404259	0.234193		0.0935075	0.115346		2.75031	0.758716		0.459989	0.701663		0.0847581	-0.102726		0.364217	-0.256621
Ank2	S4R2F3;Q8C8R3;S4R2R5;S4R1J9;S4R1I1;S4R2D6;S4R1U2;S4R1M4;S4R1B7;S4R241;A0A571BDG9;A0A1D5RLB2;F7D1P5	S4R2F3;Q8C8R3;S4R2R5	Ankyrin-2	85	42	25.6	13.3	429.1	0	323.31	51244000000	1678	6.17965	1.59808	spe	9.61502	2.16533	spe	3.18338	1.68568	spe	0.0868432	-0.0343463		0.438129	0.143318		0.102065	-0.0346273		0.808443	0.350492		0.6617	0.106882		0.846476	-0.105253		1.12198	-0.16151
Pitpnm2	E9PYJ7;Q6ZPQ6;A0A0G2JFQ8;E0CXR4	E9PYJ7;Q6ZPQ6	Membrane-associated phosphatidylinositol transfer protein 2	17	17	15	15	147.62	0	137.93	7277600000	216	3.69727	2.03097	spe	6.49995	2.05343	spe	4.59136	2.48515	spe	0.0035379	-0.0026722		0.0826292	0.0236401		0.328467	0.561837		0.530725	0.896177		0.699706	0.759527		0.505172	0.797595		0.038789	0.0908632
Prrc2c	S4R294;S4R2J9;A0A0A0MQ79;Q3TLH4;S4R2L9;S4R209;S4R2E2	S4R294;S4R2J9;A0A0A0MQ79;Q3TLH4	Protein PRRC2C	16	15	6.5	6.2	298.11	0	30.205	4050300000	124	5.70136	1.79207	spe	4.70781	1.76175	spe	4.26002	2.71157	spe	0.217091	0.0788383		0.29969	0.0808262		NaN	0		NaN	0		1.1253	0.731508		0.175041	-0.184212		NaN	0
Map6	Q7TSJ2;A0A140LIT9;D3Z6W1	Q7TSJ2;A0A140LIT9;D3Z6W1	Microtubule-associated protein 6	69	69	84.5	84.5	96.449	0	323.31	148840000000	2313	5.89442	1.05871	spe	8.81154	1.11547	spe	5.80075	1.35465	spe	0.333917	0.0908511		0.427301	-0.0812087		0.138285	0.0771793		1.71628	-0.19205		1.13657	0.34789		0.0168038	0.0103		0.171426	-0.0872189
Stau1	A2A5R8;Q9DBE7;A2A5S3;Q9Z108;V9GX87	A2A5R8;Q9DBE7;A2A5S3;Q9Z108;V9GX87	Double-stranded RNA-binding protein Staufen homolog 1	17	17	40	40	53.746	0	128.29	6038800000	173	3.58682	1.74301	spe	6.59417	2.07314	spe	3.04285	2.60767	spe	0.165431	0.159842		0.629631	-0.243566		NaN	0		NaN	0		1.16439	0.880177		0.0969551	0.121539		NaN	0
Csde1	Q91W50;Q8JZN2;A0A0G2JF72;A0A0G2JDJ7;A0A0G2JE62	Q91W50;Q8JZN2;A0A0G2JF72	Cold shock domain-containing protein E1	21	21	26.3	26.3	88.79	0	157.18	18958000000	427	6.99679	3.85844	spe	11.4199	4.41988	spe	8.10435	4.55105	spe	0.157859	-0.0554778		0.0278121	-0.0119459		0.614594	0.609132		NaN	0		1.25331	1.21822		0.223883	-0.362959		0.0409171	-0.0608241
Alyref	O08583;G3X9I4;Q9JJW6	O08583	THO complex subunit 4	11	11	46.3	46.3	26.94	0	323.31	172080000000	886	7.98344	2.76093	spe	9.68261	2.39128	spe	7.77013	2.5075	spe	0.639512	0.228465		0.802646	-0.220868		2.03609	-0.640139		0.0285289	-0.0152543		1.34058	-0.337208		0.312564	-0.157225		0.776262	0.2908
Rps18;Gm10260	P62270;F6YVP7;A0A1Y7VKY1;S4R1N6;A0A3Q4EGP3	P62270;F6YVP7;A0A1Y7VKY1;S4R1N6	40S ribosomal protein S18	32	32	84.9	84.9	17.718	0	323.31	1168100000000	1876	10.6821	5.60146	spe	21.9387	6.11867	spe	11.9049	6.04923	spe	0.426396	-0.113692		2.05163	0.144072		1.37055	0.386629		1.75478	0.431149		1.37648	0.334456		0.653398	0.165695		0.734517	-0.214459
Sf3b2	Q3UJB0;A0A494B9S9	Q3UJB0		19	19	27.4	27.4	98.197	0	105.93	6428900000	175	5.33048	2.37039	spe	7.17353	2.76759	spe	3.74314	2.21834	spe	0.0437924	-0.0144548		0.540591	-0.110293		1.11622	1.16455		1.29823	0.876214		1.59242	0.987929		0.173305	-0.29249		0.0183578	-0.0329281
Dclk2	A0A0A6YX71;A0A0A6YX33;A0A0A6YWI6	A0A0A6YX71;A0A0A6YX33;A0A0A6YWI6		17	3	23.8	3.8	78.052	0	97.884	9049100000	412	3.51327	2.25102	spe	10.116	2.33917	spe	2.37574	2.1694	spe	0.922093	-0.290357		0.470286	0.141509		0.234736	0.121299		1.16787	-0.736161		1.99924	0.534547		0.485476	-0.254241		0.765134	-0.597038
Clasp2	E9Q8N5;Q08EB6;Q8BRT1;Q08EB5;F7DCH5;A0A1L1SRY3;Q8BSE7;A0A1L1ST22	E9Q8N5;Q08EB6;Q8BRT1;Q08EB5;F7DCH5	CLIP-associating protein 2	22	22	18.4	18.4	140.72	0	122.27	8834100000	430	6.21518	2.41884	spe	5.21903	2.30017	spe	3.99933	2.67288	spe	0.496295	-0.232899		0.278205	0.135193		0.027166	0.0272462		3.15932	-0.878848		2.29303	0.605201		0.468069	-0.344956		0.774237	-0.515143
Tubb2b	Q9CWF2	Q9CWF2	Tubulin beta-2B chain	2	2	3.6	3.6	49.953	0	117.99	24931000000	230	6.58064	3.94297	spe	3.44555	2.70768	spe	4.1616	3.41567	spe	0.410763	0.474133		0.26522	0.0833071		0.728796	-0.549677		0.410975	-0.128343		2.33018	-0.375437		0.150584	0.148027		0.149394	0.150077
Farp1	F8VPU2;E9Q805	F8VPU2	FERM, RhoGEF and pleckstrin domain-containing protein 1	12	12	13.9	13.9	118.87	0	67.777	25653000000	335	2.00595	2.0441	spe	5.00889	2.84547	spe	4.02672	1.57625	spe	0.0710391	-0.0431274		1.1087	-0.211846		0.45886	0.339522		0.319717	0.784745		3.72989	0.754603		0.0212899	0.0209729		0.669259	-0.850176
Ap2m1	P84091;Q3TWV4;A0A338P798;A0A338P6T4	P84091;Q3TWV4	AP-2 complex subunit mu	31	31	61.4	61.4	49.654	0	323.31	122040000000	1166	3.17572	2.95898	spe	11.9691	2.80136	spe	4.62832	2.48498	spe	0.480344	0.227009		0.120496	0.0253125		0.63742	0.407553		0.139502	0.124925		4.34711	0.722694		0.773423	-0.375621		0.351522	-0.19388
Macf1	Q9QXZ0;E9PVY8;B1ARU4;E9QA63;A0A0A0MQA6;A0A571BF93;E9QNP1;F7ACR9;A0A571BGC6;F6Q750;B1ARU1;F6YKN8;F6RCJ3;F6RL59;F6SHS0;F6XCT0;A0A0A0MQH5;A0A286YD76	Q9QXZ0;E9PVY8;B1ARU4;E9QA63;A0A0A0MQA6;A0A571BF93;E9QNP1;F7ACR9;A0A571BGC6;F6Q750;B1ARU1	Microtubule-actin cross-linking factor 1	20	20	3.4	3.4	831.87	0	214.91	10232000000	217	4.80165	3.3647	spe	9.64222	3.68036	spe	7.83109	3.16798	spe	0.102376	-0.0379515		0.0857488	-0.0242506		0.462809	0.366832		0.007336	0.0114616		NaN	0		0.461128	0.441233		0.0274076	0.0385478
Rps28	G3UYV7;P62858	G3UYV7;P62858	40S ribosomal protein S28	8	8	75	75	6.3442	0	84.071	13052000000	257	6.75155	3.38385	spe	13.81	4.0022	spe	7.07529	3.64419	spe	0.0522731	-0.0206467		0.759726	0.185598		1.17749	1.18795		0.0463073	-0.0680447		NaN	0		0.418787	0.339506		0.569619	-0.544064
Rsl1d1	Q8BVY0;A0A2R8VHW2	Q8BVY0	Ribosomal L1 domain-containing protein 1	18	18	31.9	31.9	50.421	0	221.86	16374000000	333	5.98169	3.9108	spe	14.1453	3.99934	spe	7.68512	3.94839	spe	0.0448754	0.021533		0.105092	-0.0330664		NaN	0		0.0793661	-0.0786549		NaN	0		NaN	0		0.530631	0.414361
Rps29	P62274	P62274	40S ribosomal protein S29	6	6	60.7	60.7	6.6767	0	48.496	155440000000	281	7.59375	6.64572	spe	13.8128	7.57184	spe	9.79938	7.52212	spe	0.63732	-0.199977		1.18132	0.213052		NaN	0		0.720343	0.931255		NaN	0		NaN	0		0.707249	0.776785
Rpl37	Q9D823	Q9D823	60S ribosomal protein L37	13	13	66	66	11.078	0	29.918	60744000000	296	9.19738	6.10673	spe	12.9281	5.71124	spe	7.18735	6.33698	spe	0.626959	-0.219522		0.0476826	-0.0185881		NaN	0		1.11253	1.09054		NaN	0		NaN	0		0.884199	0.931284
Fmr1	E9QAT0;D3Z6U8;E9QNF5;Q6AXB7;P35922;E9QAS9;E9QAS8;A0A0G2JGH0	E9QAT0;D3Z6U8;E9QNF5;Q6AXB7;P35922;E9QAS9;E9QAS8	Fragile X mental retardation protein 1 homolog	14	14	23.1	23.1	66.169	0	98.483	6403400000	200	4.63251	2.29215	spe	2.22284	1.67388	spe	4.45987	2.63808	spe	0.215491	-0.096838		0.83297	-0.93532		0.714694	1.07352		NaN	0		NaN	0		0.659529	0.924949		0.530574	-0.776185
Znf326	A0A0R4J098;O88291;D3YXQ7;D6RG92	A0A0R4J098;O88291	DBIRD complex subunit ZNF326	12	12	23.4	23.4	65.166	0	81.269	4547700000	139	2.83959	1.52634	spe	3.63182	1.66708	spe	3.17841	1.51743	spe	0.50826	0.217148		0.0289012	0.032338		1.55354	0.96104		NaN	0		NaN	0		0.561717	0.444492		0.364397	-0.37961
Mrpl45	Q9D0Q7;F6QAU7	Q9D0Q7	39S ribosomal protein L45, mitochondrial	12	12	46.7	46.7	35.41	0	62.355	8427700000	116	1.88863	1.86837	spe	6.51332	3.13194	spe	2.08001	1.83768	spe	0.109866	-0.207971		1.24777	1.14586		NaN	0		NaN	0		NaN	0		NaN	0		NaN	0
Abcf1	Q6P542	Q6P542	ATP-binding cassette sub-family F member 1	9	9	15.1	15.1	94.944	0	117.1	3555600000	87	4.68698	1.69251	spe	2.51899	1.32114	spe	2.41221	1.49531	spe	0.663129	0.4314		0.96185	-0.6705		NaN	0		NaN	0		NaN	0		NaN	0		NaN	0
Mrpl48	A0A140LHT6;E9QPQ8;Q8JZS9;A0A140LI38;A0A140LHD4	A0A140LHT6;E9QPQ8;Q8JZS9	39S ribosomal protein L48, mitochondrial	5	5	32.7	32.7	12.954	0	26.477	8512500000	143	4.47619	2.38623	spe	9.40484	2.89065	spe	2.47131	2.10505	spe	0.510059	0.400127		0.283242	0.0645645		NaN	0		NaN	0		NaN	0		NaN	0		NaN	0
Pnmal2	G3X9N3	G3X9N3		8	8	14.1	14.1	71.755	0	72.16	4047500000	124	3.26683	2.03327	spe	9.10217	2.04264	spe	2.63492	1.76504	spe	0.38821	0.244086		0.298518	0.088622		NaN	0		NaN	0		NaN	0		NaN	0		NaN	0
Mrpl12	Q9DB15	Q9DB15	39S ribosomal protein L12, mitochondrial	8	8	48.3	48.3	21.708	0	59.841	5213700000	112	3.83733	2.01648	spe	1.66924	1.31091	spe	2.71345	1.85682	spe	0.0196759	0.0167437		0.626007	-0.676529		NaN	0		NaN	0		NaN	0		NaN	0		NaN	0
Mrpl1	Q99N96;Q9D3F3	Q99N96;Q9D3F3	39S ribosomal protein L1, mitochondrial	10	10	28.3	28.3	37.596	0	51.808	4080300000	94	2.91876	1.41264	spe	1.55587	1.28061	spe	2.78658	1.88572	spe	0.0325528	0.0296415		0.177653	-0.277723		NaN	0		NaN	0		NaN	0		NaN	0		NaN	0
Luc7l	Q9CYI4;A0A0R4J047;D3Z765;F6QU81;D6RGP6	Q9CYI4;A0A0R4J047;D3Z765	Putative RNA-binding protein Luc7-like 1	8	8	24.3	24.3	43.934	0	41.83	6653600000	139	3.96428	2.20577	spe	10.9441	2.99679	spe	2.84394	2.4357	spe	0.0947183	0.118183		0.26598	0.0980892		NaN	0		NaN	0		NaN	0		NaN	0		NaN	0
Fyttd1	Q91Z49;D3Z591	Q91Z49	UAP56-interacting factor	10	10	38.8	38.8	35.887	0	67.309	5289400000	103	1.58327	1.3872	spe	9.92499	2.38954	spe	2.96574	2.01762	spe	0.266823	-0.240285		0.551348	0.348353		NaN	0		NaN	0		NaN	0		NaN	0		NaN	0
Spon1	Q8VCC9;Q3UYD7	Q8VCC9	Spondin-1	8	8	12.4	12.4	90.82	0	42.838	2835100000	94	3.34309	1.30594	spe	2.99892	1.3687	spe	2.97159	1.50911	spe	0.518967	-0.17533		0.0695098	0.0592871		NaN	0		NaN	0		NaN	0		NaN	0		NaN	0
Cenpv	Q9CXS4;F6SS03	Q9CXS4	Centromere protein V	9	9	38.5	38.5	27.541	0	103.95	5419300000	111	3.50101	1.70656	spe	3.12222	1.95728	spe	3.0756	2.35557	spe	0.697993	0.533462		0.995769	-0.981372		NaN	0		NaN	0		NaN	0		NaN	0		NaN	0
Mrpl15	Q9CPR5;A0A0A6YVP4;F8WHN1	Q9CPR5;A0A0A6YVP4	39S ribosomal protein L15, mitochondrial	10	10	31.2	31.2	33.541	0	34.583	14184000000	149	4.54674	2.45359	spe	9.38776	3.96452	spe	3.14385	2.95712	spe	0.28994	0.385557		1.087	0.520879		NaN	0		NaN	0		NaN	0		NaN	0		NaN	0
Mrps22	Q9CXW2	Q9CXW2	28S ribosomal protein S22, mitochondrial	12	12	28.4	28.4	41.192	0	52.624	15616000000	244	8.62577	3.71425	spe	12.6423	4.41384	spe	3.18831	3.23062	spe	0.497518	0.632277		0.154778	0.0313709		NaN	0		NaN	0		NaN	0		NaN	0		NaN	0
Mrpl13	Q9D1P0;F7CXG9;G5E909	Q9D1P0;F7CXG9	39S ribosomal protein L13, mitochondrial	6	6	42.1	42.1	20.677	0	42.393	8040600000	117	5.31745	2.565	spe	7.42538	2.92943	spe	3.84673	2.41658	spe	0.514479	0.376553		1.19606	0.455857		NaN	0		NaN	0		NaN	0		NaN	0		NaN	0
Dhx57	Q6P5D3	Q6P5D3	Putative ATP-dependent RNA helicase DHX57	9	9	8.6	8.6	155.76	0	308.97	6496900000	146	6.38816	2.18573	spe	7.80071	2.45766	spe	3.85068	2.68379	spe	0.0726681	-0.0452137		0.0785235	-0.0295935		NaN	0		NaN	0		NaN	0		NaN	0		NaN	0
Mrpl55	Q9CZ83	Q9CZ83	39S ribosomal protein L55, mitochondrial	10	10	48	48	15.121	0	145.94	5789000000	101	3.51088	1.9721	spe	2.62917	1.95091	spe	4.04843	2.68712	spe	0.121309	-0.156591		0.0305019	0.0584974		NaN	0		NaN	0		NaN	0		NaN	0		NaN	0
Rrs1	Q9CYH6	Q9CYH6	Ribosome biogenesis regulatory protein homolog	15	15	42.7	42.7	41.551	0	79.328	7696800000	202	4.12794	2.76885	spe	9.62807	2.63738	spe	4.10155	2.7552	spe	0.362483	0.316094		0.449161	0.0819161		NaN	0		NaN	0		NaN	0		NaN	0		NaN	0
Raly	A2AU61;A2AU62;Q64012;A2AU60	A2AU61;A2AU62;Q64012;A2AU60	RNA-binding protein Raly	13	13	57.3	57.3	23.12	0	24.096	4667000000	117	3.69648	1.58728	spe	3.53507	1.67347	spe	4.8467	1.73418	spe	0.902737	-0.222214		0.140978	-0.147209		NaN	0		NaN	0		NaN	0		NaN	0		NaN	0
Mrps18b	Q99N84;G3UYQ9;G3UYX8;G3UX79	Q99N84;G3UYQ9;G3UYX8;G3UX79	28S ribosomal protein S18b, mitochondrial	8	8	25.6	25.6	28.702	0	56.337	9247800000	214	6.45548	2.73787	spe	9.52857	3.17306	spe	5.01866	2.76738	spe	0.503037	-0.101689		2.77795	0.190376		NaN	0		NaN	0		NaN	0		NaN	0		NaN	0
Mrpl46	Q9EQI8	Q9EQI8	39S ribosomal protein L46, mitochondrial	12	12	39.9	39.9	32.131	0	55.555	19452000000	249	5.73997	3.81632	spe	9.42369	4.26158	spe	5.1511	4.30811	spe	2.07717	-0.150013		0.552588	-0.0668701		NaN	0		NaN	0		NaN	0		NaN	0		NaN	0
Hnrnpul1	Q8VDM6	Q8VDM6	Heterogeneous nuclear ribonucleoprotein U-like protein 1	8	8	10.9	10.9	96.001	0	35.536	4201800000	121	2.2916	1.7323	spe	4.78417	1.74334	spe	5.16084	2.23685	spe	0.898932	-0.239821		0.940914	0.147758		NaN	0		NaN	0		NaN	0		NaN	0		NaN	0
Znf22	Q9ERU3	Q9ERU3	Zinc finger protein 22	12	12	43.9	43.9	27.294	0	94.963	12445000000	213	6.48534	3.54872	spe	11.0129	3.56336	spe	5.18272	3.57327	spe	0.516279	-0.137384		0.442644	-0.110121		NaN	0		NaN	0		NaN	0		NaN	0		NaN	0
Mrpl27	Q99N92	Q99N92	39S ribosomal protein L27, mitochondrial	6	6	52.7	52.7	15.944	0	29.953	14397000000	173	4.97533	2.53211	spe	10.7946	3.19171	spe	5.21618	2.80342	spe	0.00054667	-0.000214895		0.562585	0.231641		NaN	0		NaN	0		NaN	0		NaN	0		NaN	0
Lyar	Q08288;D3Z7N3;D3Z345;D6RDT2;D3Z009;D3YU83;D3Z5X8	Q08288	Cell growth-regulating nucleolar protein	8	8	26	26	43.735	0	35.511	3747700000	123	4.05224	1.91527	spe	7.13036	1.7524	spe	5.31567	1.86822	spe	0.107781	-0.0577129		0.34871	-0.124379		NaN	0		NaN	0		NaN	0		NaN	0		NaN	0
Gtpbp1	O08582;A0A2R8W6Z1;A0A2R8W725;A0A2R8VHC2;A0A2R8VKJ2;A0A2R8VI47	O08582	GTP-binding protein 1	14	14	25.6	25.6	72.3	0	119.06	7563400000	153	7.21839	2.41827	spe	11.8718	3.03663	spe	5.71507	2.65486	spe	0.166924	0.0571982		0.000567855	0.00016488		NaN	0		NaN	0		NaN	0		NaN	0		NaN	0
Mrpl40	D3Z7C0;Q9Z2Q5	D3Z7C0;Q9Z2Q5	39S ribosomal protein L40, mitochondrial	9	9	48.8	48.8	19.378	0	138.23	21268000000	269	7.6906	3.72704	spe	12.5425	4.49829	spe	6.33277	4.62886	spe	0.611714	-0.20945		0.644594	0.137001		NaN	0		NaN	0		NaN	0		NaN	0		NaN	0
U2af1	Q9D883;G3UW94;A0A494B947;E9Q5Y2;E9PUZ3;E9Q1I7;Q8BGJ9;E9PWX6;A0A494BA95;E9PWM2;A0A494B9X9;E9Q809;F8WH71;E9Q5J3;E9PWA1;A0A140LII6	Q9D883;G3UW94;A0A494B947	Splicing factor U2AF 35 kDa subunit	9	9	37.7	37.7	27.815	0	97.608	16007000000	164	5.79836	3.71843	spe	10.5311	3.99894	spe	6.33509	4.53323	spe	0.369288	-0.133253		0.33993	-0.0750229		NaN	0		NaN	0		NaN	0		NaN	0		NaN	0
Hdlbp	Q8VDJ3;A0A087WP83;A0A087WS92;A0A087WQY9;A0A087WPC5;A0A087WPH2	Q8VDJ3;A0A087WP83	Vigilin	22	22	20.7	20.7	141.74	0	172.42	13229000000	232	5.55782	3.3261	spe	8.84444	3.45367	spe	6.51678	3.67303	spe	0.0936595	0.0190137		0.188438	-0.0362902		NaN	0		NaN	0		NaN	0		NaN	0		NaN	0
Kxd1;Uba52	E9QNP0;P62984	E9QNP0;P62984	Ubiquitin-60S ribosomal protein L40;Ubiquitin;60S ribosomal protein L40	3	3	8.6	8.6	26.856	0	12.341	14598000000	140	7.07245	3.71062	spe	10.2428	3.92253	spe	6.55096	4.32275	spe	0.22618	-0.112048		0.605466	-0.18566		NaN	0		NaN	0		NaN	0		NaN	0		NaN	0
Mrps18a	Q99N85;Q5U5I3;D3Z603	Q99N85;Q5U5I3;D3Z603	28S ribosomal protein S18a, mitochondrial	5	5	31.1	31.1	22.321	0	16.758	7893800000	98	5.05985	2.48681	spe	6.98082	2.89627	spe	7.31548	3.19877	spe	1.17868	-0.164294		0.779298	0.271721		NaN	0		NaN	0		NaN	0		NaN	0		NaN	0
Wibg	Q8CHP5	Q8CHP5	Partner of Y14 and mago	12	12	69	69	22.689	0	211.04	29500000000	273	6.67261	4.06977	spe	11.4401	4.82007	spe	7.52564	4.29368	spe	0.348914	-0.205094		0.885713	0.334197		NaN	0		NaN	0		NaN	0		NaN	0		NaN	0
Nop58	Q6DFW4;A0A087WQ46;A0A0A0MQ76;A0A087WSU5;A0A087WP00;A0A087WSL8	Q6DFW4;A0A087WQ46;A0A0A0MQ76	Nucleolar protein 58	9	9	20.5	20.5	60.342	0	100.89	9482300000	145	4.47815	2.95466	spe	4.25457	2.66689	spe	7.76217	3.43993	spe	0.188678	0.057875		0.955313	-0.964209		NaN	0		NaN	0		NaN	0		NaN	0		NaN	0
Znf771	Q8BJ90	Q8BJ90	Zinc finger protein 771	12	12	47	47	35.767	0	31.91	7781200000	233	3.20465	2.68449	spe	9.73583	3.28703	spe	7.91324	3.0708	spe	0.47671	-0.19261		0.307831	0.096478		NaN	0		NaN	0		NaN	0		NaN	0		NaN	0
Nop16	Q9CPT5;D3Z7M5;D6RDE0	Q9CPT5;D3Z7M5	Nucleolar protein 16	12	12	56.2	56.2	21.139	0	87.959	9791000000	174	9.63709	3.77166	spe	10.5789	3.20161	spe	9.6711	2.9905	spe	1.06814	0.132223		0.714461	-0.106853		NaN	0		NaN	0		NaN	0		NaN	0		NaN	0
Ilf3	Q9Z1X4	Q9Z1X4	Interleukin enhancer-binding factor 3	33	2	44.9	7.8	96.02	0	323.31	66319000000	709	7.7612	4.74209	spe	14.7892	6.15503	spe	10.1321	6.15308	spe	0.572247	-0.140047		0.642515	0.157227		NaN	0		NaN	0		NaN	0		NaN	0		NaN	0
Luc7l2	Q7TNC4;E9Q715;Q05CX5	Q7TNC4;E9Q715;Q05CX5	Putative RNA-binding protein Luc7-like 2	17	10	40.6	23.7	46.582	0	228.69	28327000000	464	1.69376	2.7143	spe	0.219931	0.299335		1.29618	1.70363	spe	0.167832	-0.131217		1.27069	-0.57661		0.0172798	-0.00687949		0.494717	-0.192364		0.379644	0.189338		2.6968	-0.393735	down0.3	0.761262	0.207991
Map4	E9PZ43;A0A0G2JDN7	E9PZ43;A0A0G2JDN7	Microtubule-associated protein	32	11	39.1	16.2	97.795	0	168.86	40500000000	1025	4.81733	1.15276	spe	3.80424	0.941244		3.01202	1.24757	spe	0.381888	0.142626		1.60039	-0.283697	down0.2	1.98529	0.533742		0.475203	-0.257261		1.12655	0.722082		0.64718	-0.277381		0.277296	0.132922
Prkra	Q9WTX2	Q9WTX2	Interferon-inducible double-stranded RNA-dependent protein kinase activator A	14	14	40.3	40.3	34.371	0	58.92	5911100000	143	4.55641	2.31762	spe	1.20233	0.771226		6.59795	3.07717	spe	2.72306	-0.548626	down0.5	2.75699	-1.55073	down1	NaN	0		NaN	0		NaN	0		NaN	0		NaN	0
Rpl5	P47962;D3YYV8	P47962	60S ribosomal protein L5	15	15	41.4	41.4	34.4	0	71.47	4551700000	120	4.37554	2.81715	spe	0.298544	0.398954		1.45134	1.36792	spe	1.50085	1.47815	up1	2.0001	-2.17227	down1	NaN	0		NaN	0		NaN	0		NaN	0		NaN	0
Puf60	Q3UEB3	Q3UEB3	Poly(U)-binding-splicing factor PUF60	9	9	24.3	24.3	60.248	0	64.548	3619400000	77	3.12927	2.09937	spe	1.20197	0.982725		1.46796	1.36685	spe	1.97254	1.53846	up1	1.91406	-1.68827	down1	NaN	0		NaN	0		NaN	0		NaN	0		NaN	0
Glyr1	D3YYT1;Q922P9	D3YYT1;Q922P9	Putative oxidoreductase GLYR1	14	14	30.1	30.1	60.435	0	97.478	3775500000	100	4.49318	1.79986	spe	0.0252542	-0.0386217		1.5951	1.55698	spe	0.365232	0.463018		1.85061	-1.70227	down1	NaN	0		NaN	0		NaN	0		NaN	0		NaN	0
Fbll1	Q80WS3	Q80WS3	rRNA/tRNA 2-O-methyltransferase fibrillarin-like protein 1	11	11	33.8	33.8	33.338	0	38.494	4099300000	105	2.86868	1.85763	spe	0.808729	0.72171		3.50446	1.86365	spe	0.914454	0.488103		2.63292	-1.99613	down1	NaN	0		NaN	0		NaN	0		NaN	0		NaN	0
Strbp	Q91WM1;A2BH83;A2BH82	Q91WM1	Spermatid perinuclear RNA-binding protein	6	6	10.6	10.6	73.704	0	11.89	3753800000	94	3.13193	1.83598	spe	1.60171	0.986284		1.97477	1.5279	spe	0.280801	0.235404		0.630633	-0.552428		NaN	0		NaN	0		NaN	0		NaN	0		NaN	0
Hdgfrp3	Q9JMG7	Q9JMG7	Hepatoma-derived growth factor-related protein 3	4	4	13.9	13.9	22.43	0	56.285	2062100000	67	2.33632	1.3245	spe	1.67668	0.979184		2.04854	1.4463	spe	0.977697	0.15671		0.855216	-0.588676		NaN	0		NaN	0		NaN	0		NaN	0		NaN	0
Nap1l1	Q3TF41;Q8BSH9;P28656	Q3TF41;Q8BSH9;P28656	Nucleosome assembly protein 1-like 1	6	4	17.7	14.7	42.732	0	27.048	2054000000	68	4.02286	1.1276	spe	1.15183	0.704143		3.55331	1.37167	spe	0.371212	0.109584		1.19546	-0.819983		NaN	0		NaN	0		NaN	0		NaN	0		NaN	0
Mrps12	O35680;E9PUY1	O35680;E9PUY1	28S ribosomal protein S12, mitochondrial	4	4	38.8	38.8	15.437	0	7.2528	2047500000	74	2.57125	1.12016	spe	1.61978	0.825581		4.13522	1.25057	spe	0.252128	-0.139		0.341688	-0.188902		NaN	0		NaN	0		NaN	0		NaN	0		NaN	0
Slc25a12	Q8BH59;V9GXX9	Q8BH59	Calcium-binding mitochondrial carrier protein Aralar1	19	16	29.5	26.1	74.569	0	130.61	17672000000	494	4.12568	2.88072	spe	2.35477	2.35838	spe	0.0893586	0.159784		0.631959	0.620249		0.0754589	0.0277978		0.94228	0.186865		0.907428	-0.242312		1.46704	0.412966		0.0353945	-0.0117162		1.87918	-0.394951	down0.3
Eif4a1;Eif4a2	P60843;Q8BTU6	P60843;Q8BTU6	Eukaryotic initiation factor 4A-I	6	2	19	7.4	46.153	0	21.151	5526500000	112	5.11772	2.92503	spe	9.46898	2.2959	spe	0.632892	0.964544		1.00022	1.18676		2.16859	-0.338939	down0.3	NaN	0		NaN	0		NaN	0		NaN	0		NaN	0
Srsf10	Q9R0U0;Q3TFP0	Q9R0U0;Q3TFP0	Serine/arginine-rich splicing factor 10	8	5	29.4	20.6	31.3	0	30.84	5705400000	111	4.29111	1.6612	spe	7.89722	2.62719	spe	1.20206	1.28634		0.499237	0.581937		4.22266	0.328504	up0.3	NaN	0		NaN	0		0.782172	0.621127		0.409332	-0.321218		NaN	0
Mrpl32	Q9DCI9	Q9DCI9	39S ribosomal protein L32, mitochondrial	4	4	25.7	25.7	21.733	0	12.309	2996400000	59	2.71443	1.1706	spe	2.47936	1.50323	spe	0.959401	0.853608		0.999655	0.801595		0.0326978	-0.0494542		NaN	0		NaN	0		NaN	0		NaN	0		NaN	0
Rpl22l1	Q9D7S7	Q9D7S7	60S ribosomal protein L22-like 1	3	3	27	27	14.467	0	15.265	5790400000	173	5.91249	2.60078	spe	2.38431	1.58761	spe	0.787827	0.927635		1.06464	1.09032		0.577902	-0.644138		0.276103	0.584696		1.19642	1.13944		0.336565	0.258055		0.963522	-1.03933		0.527554	0.691689
Exog	Q8C163;A0A1L1SS05;A0A1L1SUE2;E9PZS5	Q8C163;A0A1L1SS05	Nuclease EXOG, mitochondrial	8	8	30.7	30.7	41.383	0	55.873	5265500000	98	6.49615	2.23022	spe	8.85749	3.0522	spe	0.690012	1.03555		1.06246	1.38462		1.07813	0.167624		NaN	0		NaN	0		NaN	0		NaN	0		NaN	0
Mrpl3	Q99N95;D3Z456;F6W7C7;A0A1L1SU47	Q99N95;D3Z456;F6W7C7	39S ribosomal protein L3, mitochondrial	11	11	40.5	40.5	39.109	0	323.31	6058000000	93	3.58599	2.31159	spe	5.56842	2.70565	spe	1.13976	1.1984		1.03861	1.0389		0.577662	0.477712		NaN	0		NaN	0		NaN	0		NaN	0		NaN	0
Cnbp	P53996;A0A0N4SVS6	P53996;A0A0N4SVS6	Cellular nucleic acid-binding protein	5	5	35.4	35.4	19.592	0	23.423	3147100000	61	1.7384	1.6457	spe	2.75553	1.43031	spe	0.299913	0.492942		0.600775	0.999125		0.230802	-0.324519		NaN	0		NaN	0		NaN	0		NaN	0		NaN	0
Mrpl35	Q9CQL6	Q9CQL6	39S ribosomal protein L35, mitochondrial	4	4	22.3	22.3	21.501	0	13.611	4374300000	74	2.05341	1.37623	spe	4.28002	1.97392	spe	0.776457	1.01686		0.491722	0.708926		0.516997	0.485277		NaN	0		NaN	0		NaN	0		NaN	0		NaN	0
Eef1a1	P10126;D3Z3I8;D3YZ68	P10126	Elongation factor 1-alpha 1	7	7	19.5	19.5	50.113	0	96.916	6501500000	147	5.09108	2.88004	spe	8.02721	2.87424	spe	0.929826	1.5562		0.401462	0.698929		0.0434559	-0.0295164		NaN	0		NaN	0		NaN	0		NaN	0		NaN	0
Fam120c	Q8C3F2	Q8C3F2	Constitutive coactivator of PPAR-gamma-like protein 2	15	15	16.1	16.1	119.72	0	43.27	4859800000	149	4.78831	2.04268	spe	7.67799	2.23551	spe	1.14814	1.32946		0.335167	0.427512		0.318302	0.100781		NaN	0		NaN	0		NaN	0		NaN	0		NaN	0
Kiaa1107;A830010M20Rik	A0A1D5RL96;Q80TK0;D3YUW2;Q3TEG0;F7CG54	A0A1D5RL96;Q80TK0;D3YUW2;Q3TEG0	Uncharacterized protein KIAA1107	13	13	9.7	9.7	190.84	0	24.603	5058300000	67	4.99251	2.58736	spe	0.573293	0.682304		0.505737	0.925804		1.11245	1.49656		2.04975	-2.21382	down1	NaN	0		NaN	0		NaN	0		NaN	0		NaN	0
Rph3a	P47708;A0A0J9YV12;P70169	P47708	Rabphilin-3A	13	13	27.2	27.2	75.488	0	162.4	5129700000	224	2.58717	1.38896	spe	1.36219	-1.09974		0.0788558	-0.117835		0.377067	0.403992		3.28082	-1.98186	down1	0.58629	-0.744441		0.569785	0.509216		3.37054	0.340479		1.18274	-1.27182		0.806473	0.949195
Rpl38	Q9JJI8	Q9JJI8	60S ribosomal protein L38	4	4	50	50	8.2038	0	42.982	5109100000	134	1.67967	1.78358	spe	NaN	0		0.738037	1.1304		0.21841	0.46335		1.8265	-1.54291	down1	0.769963	0.870067		1.03725	0.896628		0.294938	-0.154106		0.404098	0.430854		0.503952	-0.606905
Nemf	Q8CCP0;A0A1Y7VM23	Q8CCP0	Nuclear export mediator factor Nemf	9	9	8	8	121.19	0	30.2	3041400000	92	2.31495	1.49963	spe	1.35756	0.763297		0.791457	0.824226		0.970173	0.948887		2.31071	-1.29444	down1	NaN	0		NaN	0		NaN	0		NaN	0		NaN	0
Rplp1	P47955	P47955	60S acidic ribosomal protein P1	5	5	99.1	99.1	11.475	0	223.92	3942300000	73	3.07747	2.03095	spe	0.469998	0.554311		1.02223	1.32492		0.953981	1.35073		1.48052	-1.50647	down1	NaN	0		NaN	0		NaN	0		NaN	0		NaN	0
Pabpn1;Gm20521	G3UY42;Q8CCS6;G3UX74;D3YUB9;D3Z5F7	G3UY42;Q8CCS6;G3UX74;D3YUB9;D3Z5F7	Polyadenylate-binding protein 2	2	1	8.5	5	34.003	0	18.747	2097700000	51	4.59374	1.47049	spe	0.576803	0.518936		1.15135	0.895824		0.807405	0.512439		1.37461	-1.06426	down1	NaN	0		NaN	0		NaN	0		NaN	0		NaN	0
Mrps23	Q8VE22;Q3TI14;F7ARZ1;A7M7Q8;Q5SXC9	Q8VE22;Q3TI14;F7ARZ1;A7M7Q8;Q5SXC9	28S ribosomal protein S23, mitochondrial	9	9	51.4	51.4	20.348	0	65.937	2865900000	78	2.31906	1.37616	spe	1.45242	0.920332		1.18926	0.95709		1.09832	0.694277		0.200676	-0.203851		NaN	0		NaN	0		NaN	0		NaN	0		NaN	0
Tuba1b	P05213;A0A2R8VHF3	P05213	Tubulin alpha-1B chain	9	0	16	0	50.151	0	265.32	293440000000	675	4.43808	1.68334	spe	0.860218	0.777257		0.662334	1.6883		0.249388	-0.279016		0.276021	0.162725		0.0772243	0.0867004		0.555568	0.362122		0.043051	0.181078		1.2332	0.833971		0.358841	0.30418
Tubb2a	Q7TMM9	Q7TMM9	Tubulin beta-2A chain	14	2	33.5	3.6	49.906	0	323.31	785820000000	1862	3.88674	1.30575	spe	3.44112	0.96262		1.19526	0.745263		0.505882	0.217134		1.06206	0.171542		0.523779	-0.456867		1.54906	0.312437		0.919188	-0.344559		0.136662	-0.161871		0.469931	0.419764
Camk2g	Q923T9	Q923T9	Calcium/calmodulin-dependent protein kinase type II subunit gamma	7	0	14	0	59.606	0	37.931	2920300000	140	2.81874	1.02975	spe	1.2319	0.884303		0.130711	-0.191699		0.986436	0.961685		1.22746	-0.981769		NaN	0		NaN	0		NaN	0		NaN	0		NaN	0
Ccar1	Q8CH18	Q8CH18	Cell division cycle and apoptosis regulator protein 1	5	5	4.9	4.9	132.06	0	9.9463	1685000000	60	2.7949	1.03742	spe	0.293193	0.222223		0.344203	0.420944		0.581867	0.537545		0.815983	-0.56566		NaN	0		NaN	0		NaN	0		NaN	0		NaN	0
Bsn	O88737;V9GX98	O88737;V9GX98	Protein bassoon	72	71	21.9	21.6	418.84	0	323.31	24772000000	1127	6.67751	1.48026	spe	9.11384	1.35723	spe	4.86663	1.74646	spe	0.825521	0.163582		1.50543	-0.197219	down0.2	0.473307	0.189552		2.45179	-0.747452		0.0773766	-0.0353953		1.26279	-0.362793		0.53683	-0.196395
Ythdf2	Q91YT7;E9PW90	Q91YT7	YTH domain-containing family protein 2	5	3	9.8	5.9	62.279	0	20.96	2200700000	75	2.07939	1.18755	spe	6.28463	1.56734	spe	2.2779	1.38939	spe	0.481853	-0.161722		2.43855	0.305122	up0.3	NaN	0		NaN	0		NaN	0		NaN	0		NaN	0
Dstn	Q9R0P5	Q9R0P5	Destrin	7	7	41.8	41.8	18.521	0	48.893	6429000000	141	1.42424	1.40236	spe	1.45382	1.37277	spe	5.70354	2.03167	spe	0.06529	-0.0655753		0.0577355	-0.0603895		NaN	0		NaN	0		NaN	0		NaN	0		NaN	0
Tfam	P40630;A0A0R4J1N9;D3Z0F3	P40630;A0A0R4J1N9;D3Z0F3	Transcription factor A, mitochondrial	8	8	33.7	33.7	27.987	0	46.693	2471800000	76	4.34634	1.86379	spe	1.83364	1.1808	spe	2.83141	1.67942	spe	0.396136	0.244811		0.909546	-0.621607		NaN	0		NaN	0		0.935276	0.709007		0.339824	-0.275528		NaN	0
Kbtbd11	Q8BNW9	Q8BNW9	Kelch repeat and BTB domain-containing protein 11	13	13	25.9	25.9	67.945	0	83.973	4919700000	252	2.08475	1.44056	spe	1.81882	1.1798	spe	2.76697	1.7868	spe	0.271558	0.179736		0.445197	-0.246329		1.42079	0.487024		0.161192	-0.261334		2.515	0.458359		0.25222	-0.0826648		0.449906	-0.604924
Cpne6	Q9Z140;Q3UYN2;E9QA77;A0A0R4J1D0;A0A0R4J0J1;Q8BT60;P59108;Q1RLL3;Q9DC53;Q8JZW4	Q9Z140;Q3UYN2	Copine-6	17	16	33.9	33.9	61.78	0	72.051	8562900000	332	1.58035	1.03209	spe	0.396613	0.369633		1.29503	1.38787	spe	0.359576	0.29079		2.0829	-0.503183	down0.5	1.21022	-0.921419		0.0757561	-0.122323		2.97373	-1.47361		0.0674135	0.0786473		0.0348254	-0.0583719
Ebna1bp2	Q9D903;A2ACZ1	Q9D903;A2ACZ1	Probable rRNA-processing protein EBP2	5	5	18.3	18.3	34.702	0	24.835	2247800000	65	2.66964	1.06865	spe	0.679444	0.560374		4.83416	1.53781	spe	1.26145	-0.237238		0.924354	-0.764398		NaN	0		NaN	0		NaN	0		NaN	0		NaN	0
Ndufa4	Q62425;A0A0N4SVQ1	Q62425;A0A0N4SVQ1	Cytochrome c oxidase subunit NDUFA4	10	10	65.9	65.9	9.3267	0	57.839	26113000000	355	3.18509	3.35663	spe	2.64924	2.55279	spe	0.157776	0.504679		0.642219	1.15092		0.17076	-0.0962728		0.606514	-0.269615		0.746992	-0.284369		0.924101	-0.503769		0.696699	0.348104		1.34703	-0.275974	down0.2
Prkce	P16054	P16054	Protein kinase C epsilon type	6	6	11.4	11.4	83.56	0	15.694	2530500000	92	1.45785	0.995565	spe	2.19376	1.12605	spe	1.50026	0.963163		0.353566	0.0996602		0.389688	-0.289039		0.841236	0.616794		NaN	0		0.564942	0.523685		NaN	0		NaN	0
Ncdn	Q9Z0E0	Q9Z0E0	Neurochondrin	10	10	15.4	15.4	78.894	0	216.93	14200000000	377	1.88096	1.90163	spe	1.45588	1.22256	spe	0.607801	-0.52048		0.860136	0.664424		0.495846	-0.149064		1.96219	0.769672		1.84862	0.780275		0.648375	0.400773		0.24963	0.209229		0.216165	-0.110324
Gnb2	P62880;D3Z1M1;E9QKR0;D3Z1T4;D3YZX3;E9PWM7;P29387;A0A0A6YVN9;V9GWY1	P62880;D3Z1M1;E9QKR0;D3Z1T4;D3YZX3	Guanine nucleotide-binding protein G(I)/G(S)/G(T) subunit beta-2	5	5	18.8	18.8	37.331	0	53.641	4943100000	97	1.91255	2.00789	spe	4.10142	2.2054	spe	0.27622	0.600546		0.426402	0.865993		0.243413	0.419763		NaN	0		NaN	0		NaN	0		NaN	0		NaN	0
Phyhip	Q8K0S0;E0CXJ1;F7D3N3;Q8BGT8;F6U6Z2	Q8K0S0;E0CXJ1	Phytanoyl-CoA hydroxylase-interacting protein	7	7	25.5	25.5	37.554	0	21.38	5122400000	105	4.35221	2.28351	spe	4.77198	2.01517	spe	0.983897	1.36569		0.582185	0.611538		0.552519	-0.431882		NaN	0		NaN	0		NaN	0		NaN	0		NaN	0
Pdhb	Q9D051	Q9D051	Pyruvate dehydrogenase E1 component subunit beta, mitochondrial	14	14	39.3	39.3	38.937	0	240.56	30461000000	656	2.50421	1.66874	spe	0.304346	0.0737924		0.0681803	-0.145552		1.1692	0.834527		0.164649	-0.0862698		0.173395	-0.077522		1.36401	-0.37964		3.94822	-0.893201		3.80292	0.459394	up0.3	1.78421	-0.2253	down0.2
Tnr	Q8BYI9;A0A0A6YWD9	Q8BYI9	Tenascin-R	14	14	13.3	13.3	149.59	0	89.595	8541600000	423	2.03971	1.60015	spe	0.872637	0.226558		0.447006	0.50785		1.77835	1.06914	up1	1.57367	-0.49692	down0.5	2.78085	-0.474351		6.00825	-0.758382		2.48671	-0.673163		0.276257	-0.0920331		1.65291	-0.298779	down0.3
Gnb1	P62874;H3BKR2;H3BLF7;Q61011	P62874;H3BKR2;H3BLF7	Guanine nucleotide-binding protein G(I)/G(S)/G(T) subunit beta-1	9	6	27.6	18.5	37.377	0	243.72	8138000000	216	1.40903	1.28452	spe	0.332374	0.374261		1.12698	-0.751795		0.602992	0.303629		1.28424	-0.377818		0.441021	0.762626		0.01678	-0.0390679		0.672788	-1.29618		2.26759	1.78004	up1	1.59989	-1.38671	down1
Ywhah	P68510	P68510	14-3-3 protein eta	7	7	31.3	31.3	28.211	0	55.371	19597000000	315	1.58093	2.19874	spe	5.04937	-0.779018		0.0543814	0.15697		0.927038	1.00061		0.245512	0.0672152		1.40917	0.45336		1.8396	-1.76886		0.332548	-0.887137		1.08234	1.60741		1.5388	-1.50085	down1
Nrgn	P60761	P60761	Neurogranin;NEUG(55-78)	3	3	60.3	60.3	7.4963	0	27.681	23857000000	194	4.09722	3.15391	spe	0.353531	0.402964		0.925936	2.0221		0.371662	0.782357		0.386353	0.327706		0.0748358	0.239765		0.925416	1.93409		0.269642	0.689306		1.68982	-2.68696	down1	1.04376	2.16818
Clu	Q06890;E9Q9B8;E9PUU2;E9PXG5;E9Q8Y5;E9Q2G2	Q06890;E9Q9B8;E9PUU2;E9PXG5;E9Q8Y5	Clusterin;Clusterin beta chain;Clusterin alpha chain	13	13	24.3	24.3	51.655	0	87.882	3425300000	138	6.34328	2.59702	spe	0.657813	0.492319		0.354712	0.484668		1.53059	1.37732	up1	4.337	-2.17585	down1	1.96969	-1.45854		1.65067	-1.35231		0.0620977	-0.0836767		1.37836	1.27797	up1	0.121429	-0.206232
Glud1	P26443;F7CFA5	P26443	Glutamate dehydrogenase 1, mitochondrial	18	18	36.2	36.2	61.336	0	206.62	11274000000	465	1.43522	1.25254	spe	1.76322	-0.420621		0.943605	-0.446984		0.98939	0.318329		0.98288	-0.389576		0.0785813	0.0585658		0.240588	0.41109		1.54022	-1.54378		1.31301	1.4324	up1	0.263828	-0.173786
Mdh1	P14152;A0A5F8MPN8;B1ATQ3	P14152;A0A5F8MPN8	Malate dehydrogenase, cytoplasmic	13	13	39.2	39.2	36.511	0	102.5	10425000000	249	1.5121	1.80187	spe	1.25511	-0.937624		0.166785	-0.459153		0.515033	0.712639		0.294766	-0.367252		0.793753	0.848557		0.0757956	0.162037		3.34711	-2.88595		2.9679	2.51022	up1	0.271433	-0.448058
Uqcrc1	Q9CZ13;A0A0A6YWX6;A0A0A6YW82;Q9CXT8	Q9CZ13	Cytochrome b-c1 complex subunit 1, mitochondrial	12	12	27.7	27.7	52.851	0	68.168	6793800000	230	1.41653	1.25975	spe	0.355445	0.483473		1.43063	-1.61215		1.9876	1.83982	up1	3.21495	-0.363076	down0.3	0.0587617	-0.138351		1.03159	-1.48826		0.291172	-0.560766		0.291788	0.36313		0.352926	-0.479481
Hspa8	P63017;Q504P4;D3Z5E2	P63017;Q504P4	Heat shock cognate 71 kDa protein	36	23	49.2	30.3	70.87	0	323.31	103500000000	1650	1.58957	1.1587	spe	2.13957	-0.250383		0.45841	0.369046		0.587016	0.159255		2.95003	-0.40864	down0.3	4.19243	-0.444533		2.60348	-0.637693		1.45929	-0.623658		0.9926	0.255113		1.32289	-0.193505
Eif2s3x;Eif2s3y	Q9Z0N1;A2AAW9;Q9Z0N2	Q9Z0N1;A2AAW9;Q9Z0N2	Eukaryotic translation initiation factor 2 subunit 3, X-linked;Eukaryotic translation initiation factor 2 subunit 3, Y-linked	5	5	11.4	11.4	51.065	0	9.3457	1617700000	60	5.10634	1.26654	spe	NaN	0		0.0493937	0.052749		1.68995	0.922719	up0.5	2.05385	-1.23457	down1	NaN	0		NaN	0		NaN	0		NaN	0		NaN	0
Hspa5	P20029	P20029	78 kDa glucose-regulated protein	20	20	35.1	35.1	72.421	0	206.02	4759600000	255	1.97005	2.15072	spe	0.187122	0.189028		0.0292186	-0.0526247		1.84672	2.49128	up1	2.68827	-2.19779	down1	3.43146	-0.683797		2.08926	-2.05748		1.04099	-1.2461		0.454428	0.637426		1.2609	-1.36613
Bcas2	Q9D287;D6RGA5	Q9D287	Pre-mRNA-splicing factor SPF27	4	4	20.9	20.9	26.131	0	52.356	2857700000	47	4.25426	1.73254	spe	0.310352	0.337611		0.486994	0.616676		1.80264	1.51373	up1	2.14204	-1.43751	down1	NaN	0		NaN	0		NaN	0		NaN	0		NaN	0
Pip5k1c	F8WHW6;O70161;E0CYP4;F7C0X9;P70181;F6SMP3	F8WHW6;O70161	Phosphatidylinositol 4-phosphate 5-kinase type-1 gamma	15	13	24.9	21.8	75.515	0	81.939	4120800000	290	1.44266	1.29751	spe	1.99909	-1.54392		0.0370249	0.0839437		0.314372	0.529073		2.03629	-1.83287	down1	0.653756	0.350519		0.496063	0.307562		2.27512	0.696066		0.562416	-0.241641		0.250445	0.194858
Farsb	Q9WUA2;A0A087WS80;A0A087WPV4;A0A087WQ15	Q9WUA2;A0A087WS80	Phenylalanine--tRNA ligase beta subunit	9	9	16.5	16.5	65.696	0	16.054	2156700000	54	1.78016	1.05499	spe	NaN	0		0.856888	0.901415		0.563644	0.663925		3.43063	-1.59876	down1	NaN	0		NaN	0		NaN	0		NaN	0		NaN	0
Rplp2	P99027;A0A5F8MPY2	P99027;A0A5F8MPY2	60S acidic ribosomal protein P2	8	8	81.7	81.7	11.651	0	44.575	3623500000	55	2.87063	1.7608	spe	NaN	0		0.971319	1.09852		0.250777	0.386859		2.47102	-1.77819	down1	NaN	0		NaN	0		NaN	0		NaN	0		NaN	0
Pfkl	P12382;A0A1W2P6Q4	P12382	ATP-dependent 6-phosphofructokinase, liver type	14	14	21.5	21.5	85.359	0	247.78	9822300000	258	5.54556	2.93471	spe	1.05236	1.58191		0.105669	0.208405		3.16334	2.85282	up1	0.375832	-0.735237		0.124173	0.17291		2.04004	0.350024		3.09327	0.490802		0.448419	-0.518014		0.330813	0.405372
Eif5a;Eif5a2	A0A0A0MQM0;P63242;Q8BGY2	A0A0A0MQM0;P63242;Q8BGY2	Eukaryotic translation initiation factor 5A;Eukaryotic translation initiation factor 5A-1;Eukaryotic translation initiation factor 5A-2	4	4	27.5	27.5	16.302	0	19.903	1739700000	45	2.18528	1.53068	spe	1.0323	0.610667		0.0363476	-0.0516666		1.23115	1.20119		1.19747	-0.86091		NaN	0		NaN	0		NaN	0		NaN	0		NaN	0
Wasf1	Q8R5H6	Q8R5H6	Wiskott-Aldrich syndrome protein family member 1	10	9	21.6	19.9	61.508	0	36.556	5831100000	258	1.44524	1.27605	spe	0.368539	0.39397		0.264165	-0.343612		0.818428	0.67457		0.0114622	-0.00448608		0.207521	0.398209		0.655978	0.887246		0.0965469	-0.0466245		0.915977	-0.6658		0.716645	0.517561
Tubb4b	P68372;G3UZR1	P68372	Tubulin beta-4B chain	34	2	70.8	3.6	49.83	0	323.31	1273500000000	4676	4.59759	1.18769	spe	6.84546	0.974379		2.18077	0.660035		0.275401	0.08334		0.535067	0.092453		0.646141	0.261029		2.57393	0.678964		0.51059	0.0729907		0.183799	0.0955458		0.408043	0.187966
Aak1	Q3UHJ0;A0A571BDM4;A0A571BEI2	Q3UHJ0	AP2-associated protein kinase 1	13	13	21.6	21.6	103.35	0	248.68	10978000000	438	1.64636	1.24936	spe	1.90577	0.909328		0.544865	0.884274		0.321566	0.288554		0.395693	0.141337		1.42382	0.559279		0.963334	-0.438931		0.634062	-0.28117		0.421172	0.147156		0.585236	-0.226726
Tardbp	Q921F2;A0A087WRZ5;Q8R0B4;Q8BLD4;Q6VYI5;Q6VYI4;A0A087WR97;A0A087WRP4;H3BJV1;A0A087WSH7;A0A087WQA5;A0A087WS74;A0A087WSE4	Q921F2;A0A087WRZ5;Q8R0B4;Q8BLD4;Q6VYI5;Q6VYI4;A0A087WR97;A0A087WRP4;H3BJV1;A0A087WSH7;A0A087WQA5	TAR DNA-binding protein 43	7	7	14.3	14.3	44.547	0	193.61	8813400000	337	1.49025	1.06817	spe	0.461166	0.498608		0.703865	0.553532		0.0413935	0.0113246		0.723567	0.125685		0.347068	-0.169264		2.06353	-0.845125		0.654858	0.17405		0.0662037	-0.0417436		0.530904	-0.318105
Ppia	P17742;A0A1L1SST0;V9GX31	P17742;A0A1L1SST0	Peptidyl-prolyl cis-trans isomerase A;Peptidyl-prolyl cis-trans isomerase A, N-terminally processed	15	13	74.4	67.1	17.971	0	209.19	26997000000	570	1.52985	2.20027	spe	0.127492	0.0728217		0.765936	-1.08887		0.91103	1.10821		0.497383	-0.276042		0.435512	0.793316		0.357835	0.934891		0.905029	-1.31134		0.590908	1.04842		0.0444038	0.0859722
Atp5b	P56480	P56480	ATP synthase subunit beta, mitochondrial	25	25	54.8	54.8	56.3	0	323.31	134240000000	1519	1.93209	1.06713	spe	0.606881	0.24328		0.0977154	0.0954056		0.731503	0.365072		0.0332848	-0.0175429		0.526237	-0.48691		0.708777	0.232275		5.56476	-1.26957		0.266971	0.27864		0.422968	0.407619
Mp68	P56379;A0A1Y7VLP0	P56379	6.8 kDa mitochondrial proteolipid	4	4	37.9	37.9	6.6979	0	10.219	3169100000	140	1.76401	1.06284	spe	1.31766	0.771151		0.10294	-0.150901		0.803159	0.713071		0.688564	-0.532663		NaN	0		NaN	0		NaN	0		NaN	0		NaN	0
Cxcl14	Q9WUQ5;Q6AXC2	Q9WUQ5;Q6AXC2	C-X-C motif chemokine 14	2	2	18.2	18.2	11.716	0.0021978	3.3695	1439300000	47	1.71103	1.12646	spe	0.876076	0.565051		0.777986	0.709639		0.279638	0.234903		1.14038	-0.736379		NaN	0		NaN	0		NaN	0		NaN	0		NaN	0
Hagh	E9PYA3;A0A0R4J052;G5E8T9;Q99KB8;E9Q2H8	E9PYA3;A0A0R4J052;G5E8T9;Q99KB8;E9Q2H8	Hydroxyacylglutathione hydrolase, mitochondrial	2	2	11.8	11.8	26	0	14.11	851580000	48	NaN	0		NaN	0		NaN	0		NaN	0		NaN	0		0.923892	1.23077		2.1271	1.91341	spe	1.42302	1.77409	spe	0.190079	0.414852		0.771279	0.881835
Ptrf	O54724	O54724	Polymerase I and transcript release factor	13	13	38.3	38.3	43.953	0	309.46	14625000000	406	0.0682525	0.0347169		0.254056	0.0555829		1.18399	0.379642		0.337887	-0.095986		0.965392	0.179698		0.708126	0.738868		1.60529	1.09624	spe	2.51855	1.67482	spe	0.585635	-0.739698		0.454587	0.591885
Sdhb	Q9CQA3	Q9CQA3	Succinate dehydrogenase [ubiquinone] iron-sulfur subunit, mitochondrial	7	7	24.5	24.5	31.814	0	11.471	2597600000	146	0.121478	-0.132387		0.112411	0.125559		NaN	0		0.723902	0.591679		0.313016	-0.264035		0.0147618	0.0275971		2.96977	1.75538	spe	4.30337	2.33884	spe	0.149898	-0.248394		0.534192	0.707587
Dclk1	Q9JLM8;Q8CCN4	Q9JLM8	Serine/threonine-protein kinase DCLK1	23	2	37.3	4.8	84.152	0	317.61	24072000000	671	0.583185	0.275384		1.5583	1.22846	spe	1.63832	1.67623	spe	0.128018	-0.0503756		0.588014	-0.134222		0.0696668	0.0790278		0.946305	0.901609		5.02252	1.02934	spe	1.05263	-0.580963		0.113149	-0.0957578
Prdx1	B1AXW5;B1AXW6;P35700;B1AXW4	B1AXW5;B1AXW6;P35700;B1AXW4	Peroxiredoxin-1	12	12	55	55	18.87	0	36.022	3698100000	187	0.41047	0.736153		1.09214	1.03474		2.66873	2.18144	spe	0.563444	-1.07035		0.0436674	0.109957		3.63421	0.695533		1.51231	0.403861		1.34598	1.22064	spe	3.02433	0.575597	up0.5	1.75631	-0.440491	down0.3
Ccdc177	Q3UHB8	Q3UHB8	Coiled-coil domain-containing protein 177	21	21	29.3	29.3	79.856	0	93.855	5681800000	344	0.25581	0.371332		6.82534	1.87	spe	0.696721	0.700501		0.645868	-0.796567		2.17601	1.38654	up1	0.439333	0.237953		0.109584	-0.0334746		3.87425	1.00026	spe	2.33225	-0.515051	down0.5	0.714824	-0.193141
Pdha1	P35486;P35487	P35486	Pyruvate dehydrogenase E1 component subunit alpha, somatic form, mitochondrial	32	32	52.8	52.8	43.231	0	175.52	107100000000	1650	4.71784	-1.15038		5.95736	-1.12764		4.97758	-1.25361		0.877077	0.28598		0.00238885	0.00110923		6.33071	0.663599		3.18963	0.852471		4.79776	1.255	spe	2.51912	-0.316731	down0.3	0.581113	0.167729
Iscu	Q9D7P6;D3Z7W0;D3Z0K9	Q9D7P6;D3Z7W0;D3Z0K9	Iron-sulfur cluster assembly enzyme ISCU, mitochondrial	3	3	16.1	16.1	18.098	0	4.596	380280000	42	NaN	0		NaN	0		NaN	0		NaN	0		NaN	0		NaN	0		1.29395	0.910007		3.05821	2.33756	spe	2.44583	-1.74858	down1	1.08301	0.688875
Dlgap3	B1AS06;Q6PFD5	B1AS06;Q6PFD5	Disks large-associated protein 3	4	4	4.9	4.9	104.67	0	58.084	361970000	59	NaN	0		NaN	0		NaN	0		NaN	0		NaN	0		1.03827	0.853127		0.0675707	-0.0960035		5.54856	1.70695	spe	1.19422	-0.267573		0.200982	-0.19164
Rin1	Q921Q7;A0A2C9F2A2;A0A286YCR5	Q921Q7;A0A2C9F2A2	Ras and Rab interactor 1	3	3	5	5	83.013	0	6.2428	168450000	50	NaN	0		NaN	0		NaN	0		NaN	0		NaN	0		NaN	0		0.415789	0.27199		2.83033	1.27785	spe	1.10572	-0.868526		0.0346273	0.0448627
Grm5	E9QMC2;Q3UVX5	E9QMC2;Q3UVX5	Metabotropic glutamate receptor 5	9	9	9.6	9.6	128.27	0	17.015	440280000	57	NaN	0		NaN	0		NaN	0		NaN	0		NaN	0		0.574911	0.854755		1.20575	0.837323		2.10362	1.71535	spe	1.25334	-1.23736		0.210394	-0.344156
Eif3a	P23116;A0A494B9I0	P23116	Eukaryotic translation initiation factor 3 subunit A	11	11	8.9	8.9	161.93	0	20.535	917640000	119	0.742568	-0.832453		0.406966	-0.313395		0.15188	0.207042		0.4017	-0.487419		0.00240144	-0.00306712		1.60737	0.607736		0.314406	0.212271		2.11392	1.2471	spe	0.105397	-0.0922705		0.259216	-0.155482
Efnb3	O35393	O35393	Ephrin-B3	2	2	7.9	7.9	35.884	0	8.1036	349960000	47	NaN	0		NaN	0		NaN	0		NaN	0		NaN	0		0.489891	0.638302		1.99452	-0.710964		2.16019	1.42472	spe	0.447978	-0.345258		0.0415533	-0.0358518
Gpr158	Q8C419	Q8C419	Probable G-protein coupled receptor 158	11	11	11.4	11.4	134.42	0	20.622	600460000	64	NaN	0		NaN	0		NaN	0		NaN	0		NaN	0		0.611445	0.873511		0.0758027	-0.123761		2.6469	2.04214	spe	0.758249	-0.632057		0.511338	-0.530171
Dsg1b;Dsg1a;Dsg1c	Q7TSF1;Q61495;Q7TSF0	Q7TSF1;Q61495;Q7TSF0	Desmoglein-1-beta;Desmoglein-1-alpha;Desmoglein-1-gamma	3	3	3.7	3.7	114.45	0	9.8586	500360000	31	NaN	0		NaN	0		1.00712	-0.970206		NaN	0		NaN	0		1.10592	1.02553		0.481952	0.703809		3.15505	2.12977	spe	0.477953	-0.591322		0.00657436	-0.0124025
Sars	A2AFS0;Q8C483;P26638;A2AFS1	A2AFS0;Q8C483;P26638;A2AFS1	Serine--tRNA ligase, cytoplasmic	6	6	14.8	14.8	40.163	0	11.676	2804300000	171	1.01768	0.605655		0.111215	0.131138		1.90229	1.50293	spe	0.439759	0.174713		0.524695	-0.557156		0.316471	0.101416		2.44592	1.61035	spe	2.51235	-1.03222		1.43723	0.631667	up0.5	0.858685	0.256365
Bdh1	Q80XN0;D3Z2Y8	Q80XN0;D3Z2Y8	D-beta-hydroxybutyrate dehydrogenase, mitochondrial	4	4	16.6	16.6	38.299	0	42.24	2815400000	112	1.17188	0.704202		1.3699	0.903579		3.27266	1.8748	spe	3.3381	-0.458368	down0.3	0.393082	-0.345219		0.529752	0.817429		1.80389	1.34655	spe	0.32857	-0.431089		1.41554	1.46426	up1	0.0418376	-0.0729469
Dusp3	B1AQF4;Q9D7X3;Q3V2Y9;H3BKD1;H3BKL8	B1AQF4;Q9D7X3;Q3V2Y9;H3BKD1;H3BKL8	Dual specificity protein phosphatase 3	4	4	23.3	23.3	23.223	0	130.53	1487300000	93	1.12177	0.855683		0.836987	-0.5625		NaN	0		0.803782	0.538572		2.32181	-0.975239	down0.5	0.169198	-0.285618		2.70547	1.64403	spe	3.88283	-1.17231		0.408725	-0.299133		1.69028	1.06475	up1
Mbp	A0A498WGS3;P04370	A0A498WGS3;P04370	Myelin basic protein	20	20	72	72	16.537	0	323.31	5187700000000	6410	2.14118	-0.685865		0.961781	-0.170711		0.0185307	-0.0128543		0.611887	-0.205327		2.16478	0.445553	up0.3	0.345872	0.317647		3.64484	1.36608	spe	2.09548	0.8313		0.806503	-0.580706		1.80597	1.1754	up1
Shisa7	Q8C3Q5;F6T9T6	Q8C3Q5;F6T9T6	Protein shisa-7	11	11	19.4	19.4	58.333	0	28.274	1314700000	160	0.131649	-0.157281		0.12954	-0.112306		0.33847	0.393669		0.00753323	-0.0120039		0.144402	0.173972		0.896077	-0.918738		1.61084	1.27047	spe	1.43721	0.42924		1.17832	-1.14367		1.43442	1.31028	up1
Gnai2	P08752;A0A0A6YWA9;Q9DC51;A0A0A6YXN0;A0A0A6YXC2;A2AE32;P20612;Q3V3I2;P50149;F6QPU5	P08752;A0A0A6YWA9	Guanine nucleotide-binding protein G(i) subunit alpha-2	5	3	16.1	13	40.489	0	47.237	2347400000	90	NaN	0		0.29386	0.277415		0.937686	-0.912459		NaN	0		0.383034	0.479462		0.127187	0.225428		2.22317	1.13062	spe	NaN	0		0.171525	-0.260677		1.42011	1.37985	up1
Rapgef2	A0A0A6YWG7;E9QNQ4;Q8CHG7	A0A0A6YWG7;E9QNQ4;Q8CHG7	Rap guanine nucleotide exchange factor 2	13	13	12	12	184.11	0	99.439	2035600000	141	0.0934765	0.162641		0.151148	0.187408		0.24488	0.271886		0.115745	0.209331		0.112482	0.210343		0.256072	0.222161		2.83456	1.2516	spe	0.210336	0.0788736		1.36231	-0.51795	down0.5	1.20121	0.446451
Synpo	Q8CC35;E9Q3E2	Q8CC35;E9Q3E2	Synaptopodin	19	19	31.3	31.3	99.55	0	162.59	1675900000	133	NaN	0		NaN	0		NaN	0		NaN	0		NaN	0		0.883164	0.590553		1.71586	2.33938	spe	0.00311156	-0.00568485		1.38118	0.924618	up0.5	0.416661	-0.534438
Mag	P20917;Q3ZB60;A0A087WRD6	P20917;Q3ZB60;A0A087WRD6	Myelin-associated glycoprotein	2	2	5.4	5.4	69.387	0	24.696	1267300000	71	NaN	0		NaN	0		NaN	0		NaN	0		NaN	0		0.901248	1.29263		2.40225	1.63129	spe	0.377331	-0.343459		2.21233	1.95052	up1	0.0530046	-0.0902367
Atp5i	Q06185;Q8BTB6	Q06185	ATP synthase subunit e, mitochondrial	6	6	74.6	74.6	8.2355	0	83.925	13742000000	152	1.38916	-2.27466		1.35943	-2.07811		0.0599991	-0.198136		1.21597	-1.96469		0.476175	0.879403		1.13823	2.74535		1.53268	3.34133	spe	0.710857	-1.74492		0.439646	1.34335		0.133056	0.452361
Nipsnap1	O55125;Q5SVG6	O55125;Q5SVG6	Protein NipSnap homolog 1	9	9	29.9	29.9	33.363	0	43.688	5044200000	215	0.056549	0.15136		0.112396	0.159404		NaN	0		1.04749	1.42752		0.398046	-0.729923		0.548682	-0.856268		1.40999	1.79205	spe	0.419138	0.0916592		0.867692	-1.21217		0.822275	1.18533
Rab3c	P62823;Q9CXS2;A0A286YDR2	P62823;Q9CXS2;A0A286YDR2	Ras-related protein Rab-3C	4	4	20.3	20.3	25.872	0	12.503	792310000	82	NaN	0		NaN	0		0.0194244	0.0259781		NaN	0		NaN	0		0.516959	0.628878		2.14831	1.66942	spe	0.817295	0.850431		0.79725	-0.642683		1.0001	0.8254
Atp5o	Q9DB20;A0A338P776;F6XVM5;F7D3P8;A0A338P7G3	Q9DB20;A0A338P776	ATP synthase subunit O, mitochondrial	15	15	56.8	56.8	23.363	0	102.42	30101000000	570	0.501367	0.143322		0.359367	0.0977531		0.399694	-0.659985		0.292507	0.511897		0.227056	-0.0872166		0.629862	-0.532688		1.52997	2.43309	spe	1.70079	-0.623517		0.217103	-0.233669		1.19608	0.88218
Atp5h	Q9DCX2;B1ASE2	Q9DCX2;B1ASE2	ATP synthase subunit d, mitochondrial	8	8	56.5	56.5	18.749	0	38.953	7075000000	287	0.974868	1.15464		1.19895	-0.763104		0.0420954	-0.0897188		0.480244	0.693268		0.783883	-0.715099		0.0843899	0.11088		3.26579	2.10328	spe	0.454536	-0.887122		1.15241	1.42133		0.558663	0.485376
Ndufb4	Q9CQC7	Q9CQC7	NADH dehydrogenase [ubiquinone] 1 beta subcomplex subunit 4	6	6	44.2	44.2	15.081	0	20.645	1233000000	122	2.55318	-2.0513		2.82282	-1.9432		1.37578	-0.964798		NaN	0		NaN	0		0.927473	1.14621		1.60418	1.44814	spe	0.759038	-0.777484		1.00936	1.11171		0.132656	-0.258744
C1qa	P98086	P98086	Complement C1q subcomponent subunit A	6	6	20	20	25.974	0	31.41	4154900000	167	8.58744	-4.26503		1.65445	-1.61349		3.00502	-2.72827		NaN	0		NaN	0		0.818534	-1.28851		1.35822	1.20522	spe	2.97646	-2.07009		1.15175	1.8926		0.526492	0.916564
Ass1	P16460	P16460	Argininosuccinate synthase	8	8	17.5	17.5	46.584	0	40.21	1774400000	118	NaN	0		NaN	0		NaN	0		NaN	0		NaN	0		0.726113	-0.731088		1.68069	1.94168	spe	0.0698323	-0.111006		0.117423	0.184044		0.639486	0.696856
Pdxk	Q8K183	Q8K183	Pyridoxal kinase	3	3	12.5	12.5	35.015	0	7.5213	289670000	33	NaN	0		NaN	0		NaN	0		NaN	0		NaN	0		1.06434	0.900377		1.87162	1.26672	spe	0.481184	0.462298		0.918671	0.894629		0.683486	0.669053
Ermn	Q5EBJ4	Q5EBJ4	Ermin	6	6	23.1	23.1	32.148	0	27.147	1689900000	107	NaN	0		0.867193	-0.618846		NaN	0		NaN	0		NaN	0		0.848893	1.2427		4.52226	2.21046	spe	0.513295	0.751277		0.457884	0.668374		0.659361	0.705977
Eif3d	O70194;A0A2R8VK20	O70194;A0A2R8VK20	Eukaryotic translation initiation factor 3 subunit D	4	4	11.7	11.7	63.988	0	54.308	3135200000	122	0.230853	-0.267954		0.800604	0.869307		0.0425722	0.0725362		0.0992218	0.188889		1.04378	1.33259		0.587056	0.545554		1.8192	1.53294	spe	0.662719	0.838382		0.00477863	0.00797272		0.719062	0.626137
Fus	Q8CFQ9;P56959;G3UXT7;G3UZD2;Q91VQ2;F6QCI0;Q8BQ46	Q8CFQ9;P56959;G3UXT7	RNA-binding protein FUS	8	8	18.8	18.8	52.601	0	38.866	2946200000	100	NaN	0		NaN	0		NaN	0		NaN	0		NaN	0		0.169192	0.504751		3.78921	2.93229	spe	1.06007	-1.67604		0.120271	0.348905		0.791742	1.44735
Atp1b1	P14094;A0A0A6YX05	P14094	Sodium/potassium-transporting ATPase subunit beta-1	15	15	32.2	32.2	35.194	0	107.43	17939000000	485	0.451154	0.802711		4.81115	-0.878694		1.51334	-0.722496		0.00214658	-0.00175031		0.124533	-0.0453364		0.589933	-0.949908		1.3652	2.18343	spe	1.24735	-0.475777		0.471627	-0.799156		0.698862	1.08943
Cnrip1	Q5M8N0;F7C0H6	Q5M8N0;F7C0H6	CB1 cannabinoid receptor-interacting protein 1	3	3	23.2	23.2	18.612	0	21.492	1970400000	101	NaN	0		0.47468	-0.389871		0.00518412	-0.0102005		NaN	0		NaN	0		0.231176	-0.353371		3.48449	1.41042	spe	1.38503	-0.842197		0.106087	-0.182662		0.993646	0.998048
[truncated: 543 more rows]

## Sheet: Table S1C
p1_WT1	p1_WT2	p1_WT3	p2_WT1	p2_WT2	p2_WT3	p3_WT1	p3_WT2	p3_WT3	p4_WT1	p4_WT2	p4_WT3	p1_AD1	p1_AD2	p1_AD3	p1_AD4	p2_AD1	p2_AD2	p2_AD3	p2_AD4	p3_AD1	p3_AD2	p3_AD3	p3_AD4	p4_AD1	p4_AD2	p4_AD3	p4_AD4	p1_AD_tr1	p1_AD_tr2	p1_AD_tr3	p1_AD_tr4	p2_AD_tr1	p2_AD_tr2	p2_AD_tr3	p2_AD_tr4	p3_AD_tr1	p3_AD_tr2	p3_AD_tr3	p3_AD_tr4	p4_AD_tr1	p4_AD_tr2	p4_AD_tr3	p4_AD_tr4	-Log p-value 4R_AD/WT	log2 4R_AD/WT	AD/wt	-Log p-value 4R_AD-tr/AD	log2 4R_AD-tr/AD	AD-tr/AD
[truncated: 8,418 more rows]
[truncated: 16 more columns]

[truncated: 2 more sheets: Table S1D, Table S1E]
